# Supplementary material for: Insufficiency of 40S ribosomal proteins, RPS26 and RPS25, negatively affects biosynthesis of polyglycine-containing proteins in fragile-X associated conditions
Source: eLife. 2025 May 16;13:RP98631. doi: 10.7554/eLife.98631 (PMC12084008; doi:10.7554/eLife.98631)
Supplement: Supplementary file 1. — Table S1 (.xlsx file) List of siRNA used in the study. Table S2 (.xlsx file) List of primary antibodies used in the study. Table S3 (.xlsx file) Unfiltered list of proteins identified in MS2-based screening, as binding to FMR1-RNA and GC-rich RNA baits. Table S4 (.xlsx file) Results of Gene ontology analysis performed on proteins bound to FMR1 RNA . Table S5 (.xlsx file) Statistical analysis of filtered Label Free Quantification of MS2-based data (FMR1 RNA vs GC-rich RNA). Related to Figure 1B. Table S6 (.xlsx file) Unfiltered list of proteins identified in SILAC-MS analysis of cells with knocked down RPS26 level (siRPS26, heavy-labelled) and cells treated with control siRNA (siCtrl, light-label). Normalized ratio of heavy/light signals and intensities for detected proteins are given. Table S7 (.xlsx file) Statistical analysis of filtered SILAC-MS data. Related to Figure 4A. Table S8 (.xlsx file) Results of Gene ontology analysis performed on selected group of proteins (negative and positive responders) identified in SILAC-MS data. Table S9 (.xlsx file) Results of WebLogo analysis; frequencies of individual nucleotide at positions in the 20-nucleotide upstream or downstream to the start codon determined for transcripts groups (negative, positive responders and background). Table S10 (.xlsx file) Lists of k-mers (hexamers) identified in 5’UTRs of negative and positive responders. [file elife-98631-supp1.xlsx]

## Sheet: Table S1 
siRNA	Company	Catalog number
siCtrl (single)	ThermoFisher Scientific	4390847
siCtrl (pool)	Dharmacon (Horizon)	D-001810-10-05
siDHX15	ThermoFisher Scientific	s4029
siDHX9	Dharmacon (Horizon)	J 009950 06 0002
siHSPH1	ThermoFisher Scientific	s21240
siLUC7L3	ThermoFisher Scientific	s226749
siMYBBP1A	SantaCruz Biotechnology	sc-93603
siNAF1	ThermoFisher Scientific	s230739
siNOP58	ThermoFisher Scientific	s28389
siRPS25	Dharmacon (Horizon)	L-013629-00-0005
siRPS26_I	ThermoFisher Scientific	s229469
siRPS26_II	ThermoFisher Scientific	s196618
siTSR2	ThermoFisher Scientific	s40259

## Sheet: Table S2 
Antibody againt	Dilution	Company	Catalog number
9FM (anti FMRpolyG)	1/1000	Merck	MABN1788
EIF3J	1/1000	Proteintech	10439-1-AP
EIF5	1/1000	Proteintech	11155-1-AP
FMRP	1/1000	Abcam	ab17722
FUS	1/3000	home made	-
GFP	1/5000	SantaCruz Biotechnology	sc-9996 HRP
Histon 3	1/500	Abcam	ab176840
ILF3	1/1000	Proteintech	19887-1-AP
PCBP2	1/1000	Proteintech	15070-1-AP
PDCD4	1/1000	Proteintech	12587-1-AP
RACK1	1/1000	SantaCruz Biotechnology	sc-17754
RPS15	1/1000	Antikoerper	ABIN2786563
RPS25	1/1000	Abcam	ab254671
RPS26	1/1000	Abcam	ab104050
RPS6	1/5000	Abcam	ab70227
SAM68	1/2000	SantaCruz Biotechnology	sc-333
Suz12	1/1000	Abcam	ab12073
TSR2	1/1000	Thermo Fisher Scientific	PA5-56491
Vinculin	1/5000	SantaCruz Biotechnology	sc-73614 HRP

## Sheet: Table S3 
Majority protein IDs	Protein names	Gene names	Fasta headers	Number of proteins	FMR1 RNA 1A Razor + unique peptides	FMR1 RNA 1B Razor + unique peptides	FMR1 RNA 2A Razor + unique peptides	FMR1 RNA 2B Razor + unique peptides	FMR1 RNA 3A Razor + unique peptides	FMR1 RNA 3B Razor + unique peptides	GC-rich RNA 1A Razor + unique peptides	GC-rich RNA 1B Razor + unique peptides	GC-rich RNA 2 Razor + unique peptides	GC-rich RNA 3 Razor + unique peptides	Score	Intensity	Intensity FMR1 RNA 1A	Intensity FMR1 RNA 1B	Intensity FMR1 RNA 2A	Intensity FMR1 RNA 2B	Intensity FMR1 RNA 3A	Intensity FMR1 RNA 3B	Intensity GC-rich RNA 1A	Intensity GC-rich RNA 1B	Intensity GC-rich RNA 2	Intensity GC-rich RNA 3
Q9BVP2	Guanine nucleotide-binding protein-like 3	GNL3	sp|Q9BVP2|GNL3_HUMAN Guanine nucleotide-binding protein-like 3 OS=Homo sapiens OX=9606 GN=GNL3 PE=1 SV=2	1	3	3	3	3	3	3	3	3	3	2	323.31	511460000	39209000	24915000	38494000	29266000	65772000	53915000	38373000	20337000	38050000	26791000
Q9BVA1;Q13885	Tubulin beta-2B chain;Tubulin beta-2A chain	TUBB2B;TUBB2A	sp|Q9BVA1|TBB2B_HUMAN Tubulin beta-2B chain OS=Homo sapiens OX=9606 GN=TUBB2B PE=1 SV=1;sp|Q13885|TBB2A_HUMAN Tubulin beta-2A chain OS=Homo sapiens OX=9606 GN=TUBB2A PE=1 SV=1	2	5	5	5	5	5	5	4	4	4	3	323.31	1.573e+09	123020000	204080000	153310000	226310000	102700000	120640000	85303000	113260000	169860000	19974000
Q96RQ3;E9PHF7;G5E9X5;F5GYT8;E9PG35	Methylcrotonoyl-CoA carboxylase subunit alpha, mitochondrial	MCCC1	sp|Q96RQ3|MCCA_HUMAN Methylcrotonoyl-CoA carboxylase subunit alpha, mitochondrial OS=Homo sapiens OX=9606 GN=MCCC1 PE=1 SV=3;tr|E9PHF7|E9PHF7_HUMAN Methylcrotonoyl-CoA carboxylase subunit alpha, mitochondrial OS=Homo sapiens OX=9606 GN=MCCC1 PE=1 SV=1;tr|G	6	5	6	7	6	6	6	8	3	5	9	323.31	6.5947e+09	234450000	240680000	345410000	585640000	1.0517e+09	506890000	362620000	743830000	269750000	397750000
Q96GW1;A0A1W2PRR1;P14625	Endoplasmin	HSP90B1	tr|Q96GW1|Q96GW1_HUMAN Endoplasmin OS=Homo sapiens OX=9606 GN=HSP90B1 PE=1 SV=1;tr|A0A1W2PRR1|A0A1W2PRR1_HUMAN Endoplasmin OS=Homo sapiens OX=9606 GN=HSP90B1 PE=1 SV=1;sp|P14625|ENPL_HUMAN Endoplasmin OS=Homo sapiens OX=9606 GN=HSP90B1 PE=1 SV=1	3	0	0	0	0	0	0	0	0	1	1	323.31	48258000	0	0	0	0	0	0	0	0	3962800	14509000
Q8NE71;H0YGW7;A0A0G2JIC2	ATP-binding cassette sub-family F member 1	ABCF1	sp|Q8NE71|ABCF1_HUMAN ATP-binding cassette sub-family F member 1 OS=Homo sapiens OX=9606 GN=ABCF1 PE=1 SV=2;tr|H0YGW7|H0YGW7_HUMAN ATP-binding cassette sub-family F member 1 (Fragment) OS=Homo sapiens OX=9606 GN=ABCF1 PE=1 SV=1;tr|A0A0G2JIC2|A0A0G2JIC2_HUM	4	3	2	3	2	5	1	4	1	1	5	323.31	516400000	35159000	22317000	52973000	25825000	86527000	40419000	42469000	21163000	23952000	52554000
Q71U36;F8VQQ4	Tubulin alpha-1A chain	TUBA1A	sp|Q71U36|TBA1A_HUMAN Tubulin alpha-1A chain OS=Homo sapiens OX=9606 GN=TUBA1A PE=1 SV=1;tr|F8VQQ4|F8VQQ4_HUMAN Tubulin alpha chain (Fragment) OS=Homo sapiens OX=9606 GN=TUBA1A PE=1 SV=1	2	6	5	7	4	4	3	5	3	5	5	323.31	2.0787e+09	263990000	180830000	289610000	161850000	261300000	116960000	172100000	88612000	104200000	143860000
Q2NL82;I3L1Q5	Pre-rRNA-processing protein TSR1 homolog	TSR1	sp|Q2NL82|TSR1_HUMAN Pre-rRNA-processing protein TSR1 homolog OS=Homo sapiens OX=9606 GN=TSR1 PE=1 SV=1;tr|I3L1Q5|I3L1Q5_HUMAN Pre-rRNA-processing protein TSR1 homolog OS=Homo sapiens OX=9606 GN=TSR1 PE=1 SV=2	2	4	3	3	2	3	2	2	2	2	1	323.31	180080000	15162000	12743000	16788000	8468400	25720000	11424000	6077000	7598000	11445000	8592900
Q13085	Acetyl-CoA carboxylase 1;Biotin carboxylase	ACACA	sp|Q13085|ACACA_HUMAN Acetyl-CoA carboxylase 1 OS=Homo sapiens OX=9606 GN=ACACA PE=1 SV=2	10	56	43	51	37	66	53	59	29	44	55	323.31	58339000000	4464800000	3.6406e+09	3.1317e+09	2352000000	8728900000	6.4728e+09	4.054e+09	3.1314e+09	5065100000	2711500000
P78371;F5GWF6;F8VQ14	T-complex protein 1 subunit beta	CCT2	sp|P78371|TCPB_HUMAN T-complex protein 1 subunit beta OS=Homo sapiens OX=9606 GN=CCT2 PE=1 SV=4;tr|F5GWF6|F5GWF6_HUMAN T-complex protein 1 subunit beta OS=Homo sapiens OX=9606 GN=CCT2 PE=1 SV=2;tr|F8VQ14|F8VQ14_HUMAN T-complex protein 1 subunit beta OS=Hom	3	4	3	3	2	2	1	2	1	1	2	323.31	235230000	63208000	35413000	31378000	13507000	13808000	4830500	22186000	8278800	10906000	9615700
P68133;P68032;A6NL76;P63267;P62736	Actin, alpha skeletal muscle;Actin, alpha cardiac muscle 1;Actin, gamma-enteric smooth muscle;Actin, aortic smooth muscle	ACTA1;ACTC1;ACTG2;ACTA2	sp|P68133|ACTS_HUMAN Actin, alpha skeletal muscle OS=Homo sapiens OX=9606 GN=ACTA1 PE=1 SV=1;sp|P68032|ACTC_HUMAN Actin, alpha cardiac muscle 1 OS=Homo sapiens OX=9606 GN=ACTC1 PE=1 SV=1;tr|A6NL76|A6NL76_HUMAN Actin, alpha skeletal muscle OS=Homo sapiens O	10	0	1	2	1	0	1	1	1	2	0	323.31	466000000	0	14082000	7139400	21613000	0	18820000	10031000	75942000	299630000	0
P35527;CON__P35527;K7EQQ3	Keratin, type I cytoskeletal 9	KRT9	sp|P35527|K1C9_HUMAN Keratin, type I cytoskeletal 9 OS=Homo sapiens OX=9606 GN=KRT9 PE=1 SV=3;;tr|K7EQQ3|K7EQQ3_HUMAN Keratin, type I cytoskeletal 9 OS=Homo sapiens OX=9606 GN=KRT9 PE=1 SV=1	3	4	2	8	5	6	4	5	2	3	11	323.31	2382700000	18990000	22162000	107840000	106800000	521320000	243770000	328780000	115570000	165630000	196210000
P35232;C9JW96	Prohibitin	PHB	sp|P35232|PHB_HUMAN Prohibitin OS=Homo sapiens OX=9606 GN=PHB PE=1 SV=1;tr|C9JW96|C9JW96_HUMAN Prohibitin (Fragment) OS=Homo sapiens OX=9606 GN=PHB PE=1 SV=2	6	3	3	3	2	2	1	2	1	1	3	323.31	226760000	44156000	38135000	46914000	21597000	9596300	2932400	23632000	3589900	4451700	5982300
P31943;G8JLB6;E9PCY7;D6RIU0;H0YB39;D6RBM0;E7EN40	Heterogeneous nuclear ribonucleoprotein H;Heterogeneous nuclear ribonucleoprotein H, N-terminally processed	HNRNPH1	sp|P31943|HNRH1_HUMAN Heterogeneous nuclear ribonucleoprotein H OS=Homo sapiens OX=9606 GN=HNRNPH1 PE=1 SV=4;tr|G8JLB6|G8JLB6_HUMAN Heterogeneous nuclear ribonucleoprotein H OS=Homo sapiens OX=9606 GN=HNRNPH1 PE=1 SV=1;tr|E9PCY7|E9PCY7_HUMAN Heterogeneous	23	0	0	1	2	0	0	0	0	2	4	323.31	89471000	0	0	2994600	5878500	0	0	0	0	6702800	22787000
P25705;K7EK77	ATP synthase subunit alpha, mitochondrial	ATP5A1	sp|P25705|ATPA_HUMAN ATP synthase subunit alpha, mitochondrial OS=Homo sapiens OX=9606 GN=ATP5F1A PE=1 SV=1;tr|K7EK77|K7EK77_HUMAN ATP synthase subunit alpha, mitochondrial (Fragment) OS=Homo sapiens OX=9606 GN=ATP5F1A PE=1 SV=1	7	0	2	0	0	1	0	0	0	2	2	323.31	47219000	0	2977900	0	0	4476600	0	0	0	7929000	7210500
P13645;CON__P13645	Keratin, type I cytoskeletal 10	KRT10	sp|P13645|K1C10_HUMAN Keratin, type I cytoskeletal 10 OS=Homo sapiens OX=9606 GN=KRT10 PE=1 SV=6;	25	3	2	5	7	8	4	9	3	3	17	323.31	4589300000	25568000	25712000	264480000	256600000	682480000	178030000	879120000	307310000	135430000	584650000
P12268;H0Y4R1;E7ETK5	Inosine-5-monophosphate dehydrogenase 2	IMPDH2	sp|P12268|IMDH2_HUMAN Inosine-5-monophosphate dehydrogenase 2 OS=Homo sapiens OX=9606 GN=IMPDH2 PE=1 SV=2;tr|H0Y4R1|H0Y4R1_HUMAN Inosine-5-monophosphate dehydrogenase 2 (Fragment) OS=Homo sapiens OX=9606 GN=IMPDH2 PE=1 SV=1;tr|E7ETK5|E7ETK5_HUMAN Inosine	3	1	1	1	1	0	0	1	0	1	1	323.31	45849000	10822000	9014600	6873300	4169000	0	0	2775400	0	5672000	3430500
P11498	Pyruvate carboxylase, mitochondrial	PC	sp|P11498|PYC_HUMAN Pyruvate carboxylase, mitochondrial OS=Homo sapiens OX=9606 GN=PC PE=1 SV=2	5	18	15	19	13	22	14	21	12	17	23	323.31	46298000000	2.999e+09	2765100000	3.3712e+09	2426600000	5183500000	2422900000	2.9628e+09	2.9428e+09	7.6738e+09	1.9977e+09
P10809	60 kDa heat shock protein, mitochondrial	HSPD1	sp|P10809|CH60_HUMAN 60 kDa heat shock protein, mitochondrial OS=Homo sapiens OX=9606 GN=HSPD1 PE=1 SV=2	4	3	3	2	1	1	1	1	1	2	4	323.31	295490000	15445000	27953000	15715000	7285700	16555000	10257000	17298000	11268000	28748000	35076000
P0CG48;F5H265;Q96C32;Q5PY61;J3QKN0;F5GXK7;F5H747;A0A2R8Y422;F5H388;J3QS39;B4DV12;M0R2S1;F5H2Z3;F5GYU3;F5H6Q2;M0R1M6;J3QTR3;P62979;P62987;P0CG47;Q49A90;M0R1V7	Polyubiquitin-C;Ubiquitin;Ubiquitin-40S ribosomal protein S27a;Ubiquitin;40S ribosomal protein S27a;Ubiquitin-60S ribosomal protein L40;Ubiquitin;60S ribosomal protein L40;Polyubiquitin-B;Ubiquitin	UBC;UBB;UBA52;RPS27A	sp|P0CG48|UBC_HUMAN Polyubiquitin-C OS=Homo sapiens OX=9606 GN=UBC PE=1 SV=3;tr|F5H265|F5H265_HUMAN Polyubiquitin-C (Fragment) OS=Homo sapiens OX=9606 GN=UBC PE=1 SV=1;tr|Q96C32|Q96C32_HUMAN Polyubiquitin-C OS=Homo sapiens OX=9606 GN=UBC PE=1 SV=1;tr|Q5PY6	22	0	0	0	0	0	0	0	0	0	2	323.31	54692000	0	0	0	0	0	0	0	0	0	38771000
P07737;K7EJ44;I3L3D5	Profilin-1	PFN1	sp|P07737|PROF1_HUMAN Profilin-1 OS=Homo sapiens OX=9606 GN=PFN1 PE=1 SV=2;tr|K7EJ44|K7EJ44_HUMAN Profilin OS=Homo sapiens OX=9606 GN=PFN1 PE=1 SV=1;tr|I3L3D5|I3L3D5_HUMAN Profilin (Fragment) OS=Homo sapiens OX=9606 GN=PFN1 PE=1 SV=1	3	1	1	2	1	2	1	1	0	1	1	323.31	56442000	4564000	2944000	6724000	1928000	9147100	2416200	6213400	0	1571600	7752000
P06748	Nucleophosmin	NPM1	sp|P06748|NPM_HUMAN Nucleophosmin OS=Homo sapiens OX=9606 GN=NPM1 PE=1 SV=2	2	3	2	2	2	2	2	2	2	2	3	323.31	419290000	31456000	38593000	39911000	41540000	28866000	26797000	27027000	32264000	30223000	32797000
P05165;A0A1B0GU58;A0A1B0GWI4;A0A1B0GWA1;A0A1B0GUX9	Propionyl-CoA carboxylase alpha chain, mitochondrial	PCCA	sp|P05165|PCCA_HUMAN Propionyl-CoA carboxylase alpha chain, mitochondrial OS=Homo sapiens OX=9606 GN=PCCA PE=1 SV=4;tr|A0A1B0GU58|A0A1B0GU58_HUMAN Propionyl-CoA carboxylase alpha chain, mitochondrial (Fragment) OS=Homo sapiens OX=9606 GN=PCCA PE=1 SV=1;tr|	11	7	5	8	5	10	6	8	3	6	11	323.31	3.0205e+09	154290000	147940000	187020000	205810000	428860000	253920000	257860000	170840000	352800000	240820000
P04406;E7EUT5	Glyceraldehyde-3-phosphate dehydrogenase	GAPDH	sp|P04406|G3P_HUMAN Glyceraldehyde-3-phosphate dehydrogenase OS=Homo sapiens OX=9606 GN=GAPDH PE=1 SV=3;tr|E7EUT5|E7EUT5_HUMAN Glyceraldehyde-3-phosphate dehydrogenase OS=Homo sapiens OX=9606 GN=GAPDH PE=1 SV=1	2	2	3	4	2	2	3	4	3	4	3	323.31	1.9282e+09	75310000	342640000	111640000	128980000	68451000	74506000	91082000	187550000	231480000	85598000
P03612			sp|P03612|CAPSD_BPMS2 Capsid protein OS=Escherichia phage MS2 OX=329852 PE=1 SV=2	1	1	1	1	1	2	1	1	1	1	1	323.31	1303300000	61309000	5638400	79215000	8089500	362800000	69992000	99651000	2725700	12543000	123360000
P02538;CON__P02538;P48668;CON__P04259;CON__P48668;O95678;CON__O95678	Keratin, type II cytoskeletal 6A;Keratin, type II cytoskeletal 6C;Keratin, type II cytoskeletal 75	KRT6A;KRT6C;KRT75	sp|P02538|K2C6A_HUMAN Keratin, type II cytoskeletal 6A OS=Homo sapiens OX=9606 GN=KRT6A PE=1 SV=3;;sp|P48668|K2C6C_HUMAN Keratin, type II cytoskeletal 6C OS=Homo sapiens OX=9606 GN=KRT6C PE=1 SV=3;;;sp|O95678|K2C75_HUMAN Keratin, type II cytoskeletal 75 OS	23	1	1	1	1	1	1	1	0	1	3	323.31	351810000	1914700	1395400	16063000	6455500	23155000	16181000	26180000	0	18167000	119170000
P02533;CON__P02533;CON__Q6IFX2	Keratin, type I cytoskeletal 14	KRT14	sp|P02533|K1C14_HUMAN Keratin, type I cytoskeletal 14 OS=Homo sapiens OX=9606 GN=KRT14 PE=1 SV=4;;	3	0	0	1	0	1	1	2	0	0	2	323.31	251300000	0	0	14834000	0	21400000	3551200	35295000	0	0	72814000
O75367;B4DJC3	Core histone macro-H2A.1;Histone H2A	H2AFY	sp|O75367|H2AY_HUMAN Core histone macro-H2A.1 OS=Homo sapiens OX=9606 GN=MACROH2A1 PE=1 SV=4;tr|B4DJC3|B4DJC3_HUMAN Histone H2A OS=Homo sapiens OX=9606 GN=MACROH2A1 PE=1 SV=1	4	2	2	2	2	3	3	2	1	2	2	323.31	384090000	18833000	2181300	43890000	26837000	36883000	67294000	35909000	16443000	38572000	67555000
O00763	Acetyl-CoA carboxylase 2;Biotin carboxylase	ACACB	sp|O00763|ACACB_HUMAN Acetyl-CoA carboxylase 2 OS=Homo sapiens OX=9606 GN=ACACB PE=1 SV=3	5	5	7	4	6	7	4	3	5	6	5	323.31	440700000	29028000	40981000	23265000	31997000	53499000	34968000	16907000	29433000	56413000	27904000
M0R268;P09012	U1 small nuclear ribonucleoprotein A	SNRPA	tr|M0R268|M0R268_HUMAN U1 small nuclear ribonucleoprotein A (Fragment) OS=Homo sapiens OX=9606 GN=SNRPA PE=1 SV=1;sp|P09012|SNRPA_HUMAN U1 small nuclear ribonucleoprotein A OS=Homo sapiens OX=9606 GN=SNRPA PE=1 SV=3	2	0	0	0	0	0	0	0	0	0	1	323.31	7298300	0	0	0	0	0	0	0	0	0	2608700
J3KPS3;P04075;H3BR68;H3BQN4;H3BU78	Fructose-bisphosphate aldolase;Fructose-bisphosphate aldolase A	ALDOA	tr|J3KPS3|J3KPS3_HUMAN Fructose-bisphosphate aldolase OS=Homo sapiens OX=9606 GN=ALDOA PE=1 SV=1;sp|P04075|ALDOA_HUMAN Fructose-bisphosphate aldolase A OS=Homo sapiens OX=9606 GN=ALDOA PE=1 SV=2;tr|H3BR68|H3BR68_HUMAN Fructose-bisphosphate aldolase A (Frag	7	2	3	2	2	2	2	2	1	4	4	323.31	493940000	13156000	40850000	41436000	33655000	34271000	23040000	60735000	5323200	27415000	66571000
H0YLA2;P37108	Signal recognition particle 14 kDa protein	SRP14	tr|H0YLA2|H0YLA2_HUMAN Signal recognition particle 14 kDa protein OS=Homo sapiens OX=9606 GN=SRP14 PE=1 SV=1;sp|P37108|SRP14_HUMAN Signal recognition particle 14 kDa protein OS=Homo sapiens OX=9606 GN=SRP14 PE=1 SV=2	2	1	1	1	1	1	1	1	1	1	1	323.31	203540000	12723000	13623000	11465000	10002000	39316000	19140000	10790000	7416200	17217000	12456000
F8VZY9;P05783	Keratin, type I cytoskeletal 18	KRT18	tr|F8VZY9|F8VZY9_HUMAN Keratin, type I cytoskeletal 18 OS=Homo sapiens OX=9606 GN=KRT18 PE=1 SV=1;sp|P05783|K1C18_HUMAN Keratin, type I cytoskeletal 18 OS=Homo sapiens OX=9606 GN=KRT18 PE=1 SV=2	2	0	0	0	0	0	0	0	0	1	2	323.31	66377000	0	0	0	0	0	0	0	0	4610700	13295000
E5RIF1;D6RG00;H0YBX6;I3L0A0;Q15819;Q13404	Ubiquitin-conjugating enzyme E2 variant 2;Ubiquitin-conjugating enzyme E2 variant 1	UBE2V2;UBE2V1;TMEM189-UBE2V1	tr|E5RIF1|E5RIF1_HUMAN Ubiquitin-conjugating enzyme E2 variant 2 (Fragment) OS=Homo sapiens OX=9606 GN=UBE2V2 PE=4 SV=1;tr|D6RG00|D6RG00_HUMAN HCG2018358, isoform CRA_d OS=Homo sapiens OX=9606 GN=UBE2V1 PE=4 SV=2;tr|H0YBX6|H0YBX6_HUMAN Ubiquitin-conjugatin	6	0	0	0	0	0	0	0	0	0	0	323.31	7952300	0	0	0	0	0	0	0	0	0	0
D6RFI1;D6R9W4;Q16643	Drebrin	DBN1	tr|D6RFI1|D6RFI1_HUMAN Drebrin (Fragment) OS=Homo sapiens OX=9606 GN=DBN1 PE=1 SV=1;tr|D6R9W4|D6R9W4_HUMAN Drebrin (Fragment) OS=Homo sapiens OX=9606 GN=DBN1 PE=1 SV=1;sp|Q16643|DREB_HUMAN Drebrin OS=Homo sapiens OX=9606 GN=DBN1 PE=1 SV=4	4	0	0	0	0	0	0	1	1	3	0	323.31	61528000	0	0	0	0	0	0	3167300	2016100	56345000	0
D6RB09;D6RG13;D6RAT0;P61247;D6RGE0;D6RI02;D6RED7;D6RAS7;H0Y8L7;E9PFI5	40S ribosomal protein S3a	RPS3A	tr|D6RB09|D6RB09_HUMAN 40S ribosomal protein S3a (Fragment) OS=Homo sapiens OX=9606 GN=RPS3A PE=1 SV=8;tr|D6RG13|D6RG13_HUMAN 40S ribosomal protein S3a (Fragment) OS=Homo sapiens OX=9606 GN=RPS3A PE=1 SV=1;tr|D6RAT0|D6RAT0_HUMAN 40S ribosomal protein S3a O	12	1	1	0	0	1	1	1	0	0	0	323.31	95088000	1788600	3014800	0	0	13925000	14091000	9145000	0	0	0
CON__Streptavidin				1	6	9	6	6	6	7	6	5	7	6	323.31	119800000000	7.0859e+09	1101300000	9455800000	1169600000	16612000000	19834000000	9845600000	8763000000	23807000000	9983300000
CON__Q04695;Q04695;F5GWP8;K7EPJ9	Keratin, type I cytoskeletal 17	KRT17	;sp|Q04695|K1C17_HUMAN Keratin, type I cytoskeletal 17 OS=Homo sapiens OX=9606 GN=KRT17 PE=1 SV=2;tr|F5GWP8|F5GWP8_HUMAN Keratin, type I cytoskeletal 17 OS=Homo sapiens OX=9606 GN=KRT17 PE=1 SV=2;tr|K7EPJ9|K7EPJ9_HUMAN Keratin, type I cytoskeletal 17 (Frag	5	0	0	1	0	1	0	1	0	1	5	323.31	134900000	0	0	3288500	0	1848500	0	8538700	0	0	67320000
CON__P35908v2;CON__P35908;P35908	Keratin, type II cytoskeletal 2 epidermal	KRT2	;;sp|P35908|K22E_HUMAN Keratin, type II cytoskeletal 2 epidermal OS=Homo sapiens OX=9606 GN=KRT2 PE=1 SV=2	10	2	3	7	3	5	5	8	4	4	8	323.31	4.2423e+09	35704000	38492000	331790000	225160000	390460000	193670000	648280000	308980000	304970000	722650000
CON__P12763				1	0	1	0	0	0	0	0	0	1	1	323.31	161920000	0	0	0	0	0	0	0	0	15622000	77409000
CON__P04264;P04264	Keratin, type II cytoskeletal 1	KRT1	;sp|P04264|K2C1_HUMAN Keratin, type II cytoskeletal 1 OS=Homo sapiens OX=9606 GN=KRT1 PE=1 SV=6	2	4	3	11	9	10	6	9	4	6	17	323.31	23592000000	239600000	404690000	1.9916e+09	2177500000	2.1259e+09	1379500000	2632200000	1.8988e+09	2189600000	2649000000
CON__P00761				1	6	11	7	9	7	9	7	8	8	7	323.31	21646000000	631360000	1352200000	964810000	1357900000	3.1781e+09	1.5969e+09	2858700000	2436900000	576550000	2767400000
C9J4Z3;P61513	60S ribosomal protein L37a	RPL37A	tr|C9J4Z3|C9J4Z3_HUMAN 60S ribosomal protein L37a OS=Homo sapiens OX=9606 GN=RPL37A PE=1 SV=1;sp|P61513|RL37A_HUMAN 60S ribosomal protein L37a OS=Homo sapiens OX=9606 GN=RPL37A PE=1 SV=2	2	0	0	0	0	0	0	0	0	1	1	323.31	20705000	0	0	0	0	0	0	0	0	984050	6726700
A2A3R7;A2A3R5;P62753	40S ribosomal protein S6	RPS6	tr|A2A3R7|A2A3R7_HUMAN 40S ribosomal protein S6 OS=Homo sapiens OX=9606 GN=RPS6 PE=1 SV=1;tr|A2A3R5|A2A3R5_HUMAN 40S ribosomal protein S6 OS=Homo sapiens OX=9606 GN=RPS6 PE=1 SV=1;sp|P62753|RS6_HUMAN 40S ribosomal protein S6 OS=Homo sapiens OX=9606 GN=RPS6	3	1	1	1	1	1	0	1	0	1	1	323.31	149080000	14479000	3695000	6149700	3916600	47588000	0	22526000	0	2726100	18672000
A0A2R8Y793;P63261;P60709;I3L4N8;I3L3I0;I3L1U9	Actin, cytoplasmic 2;Actin, cytoplasmic 2, N-terminally processed;Actin, cytoplasmic 1;Actin, cytoplasmic 1, N-terminally processed	ACTG1;ACTB	tr|A0A2R8Y793|A0A2R8Y793_HUMAN Actin, cytoplasmic 1 (Fragment) OS=Homo sapiens OX=9606 GN=ACTB PE=1 SV=1;sp|P63261|ACTG_HUMAN Actin, cytoplasmic 2 OS=Homo sapiens OX=9606 GN=ACTG1 PE=1 SV=1;sp|P60709|ACTB_HUMAN Actin, cytoplasmic 1 OS=Homo sapiens OX=9606	21	3	4	4	4	3	4	4	3	6	3	323.31	768840000	11208000	44602000	37199000	28975000	19454000	43741000	72592000	68482000	319520000	30242000
A0A2R8Y6G6;P06733	Alpha-enolase	ENO1	tr|A0A2R8Y6G6|A0A2R8Y6G6_HUMAN Alpha-enolase OS=Homo sapiens OX=9606 GN=ENO1 PE=1 SV=1;sp|P06733|ENOA_HUMAN Alpha-enolase OS=Homo sapiens OX=9606 GN=ENO1 PE=1 SV=2	13	2	2	3	2	2	2	1	1	3	5	323.31	297510000	1344100	9214400	6369000	3279900	1149500	2577500	2649600	2904300	18422000	87832000
A0A087X0X3;P52272	Heterogeneous nuclear ribonucleoprotein M	HNRNPM	tr|A0A087X0X3|A0A087X0X3_HUMAN Heterogeneous nuclear ribonucleoprotein M OS=Homo sapiens OX=9606 GN=HNRNPM PE=1 SV=1;sp|P52272|HNRPM_HUMAN Heterogeneous nuclear ribonucleoprotein M OS=Homo sapiens OX=9606 GN=HNRNPM PE=1 SV=3	10	1	1	2	2	2	1	0	1	2	2	323.31	109370000	0	2384200	3365900	19292000	31983000	1589400	0	8021300	9827400	11759000
U3KQK0;Q99880;Q99879;Q99877;Q93079;Q8N257;Q5QNW6;Q16778;P62807;P58876;P57053;P33778;P23527;P06899;O60814	Histone H2B;Histone H2B type 1-L;Histone H2B type 1-M;Histone H2B type 1-N;Histone H2B type 1-H;Histone H2B type 3-B;Histone H2B type 2-F;Histone H2B type 2-E;Histone H2B type 1-C/E/F/G/I;Histone H2B type 1-D;Histone H2B type F-S;Histone H2B type 1-B;Histone H2B type 1-O;Histone H2B type 1-J;Histone H2B type 1-K	HIST1H2BN;HIST1H2BL;HIST1H2BM;HIST1H2BH;HIST3H2BB;HIST2H2BF;HIST2H2BE;HIST1H2BC;HIST1H2BD;H2BFS;HIST1H2BB;HIST1H2BO;HIST1H2BJ;HIST1H2BK	tr|U3KQK0|U3KQK0_HUMAN Histone H2B OS=Homo sapiens OX=9606 GN=H2BC15 PE=1 SV=1;sp|Q99880|H2B1L_HUMAN Histone H2B type 1-L OS=Homo sapiens OX=9606 GN=H2BC13 PE=1 SV=3;sp|Q99879|H2B1M_HUMAN Histone H2B type 1-M OS=Homo sapiens OX=9606 GN=H2BC14 PE=1 SV=3;sp|	15	1	1	1	1	1	1	1	1	1	1	305.48	625410000	21000000	1485200	26610000	275880000	16561000	87532000	2651200	3255200	114840000	9537000
P08779;CON__P08779	Keratin, type I cytoskeletal 16	KRT16	sp|P08779|K1C16_HUMAN Keratin, type I cytoskeletal 16 OS=Homo sapiens OX=9606 GN=KRT16 PE=1 SV=4;	3	0	0	0	0	1	0	0	0	0	4	289.74	83772000	0	0	0	0	5238800	0	0	0	0	51198000
A0A2R8YD40;A0A2U3TZM0;A0A2R8YDJ9;A0A2R8Y5J0;A0A2R8Y4X2;A0A2R8YFK9;A0A2R8Y425;A0A2R8YDW2;A0A2R8YFD8;F5GWX5;A0A2R8Y212;A0A2R8Y521;A0A0C4DGG9;Q14839;A0A2R8YER1;A0A2R8Y8C1;A0A2R8Y445;A0A2R8Y8B3;A0A2R8Y685;A0A2R8Y5Z7	Chromodomain-helicase-DNA-binding protein 4	CHD4	tr|A0A2R8YD40|A0A2R8YD40_HUMAN Chromodomain-helicase-DNA-binding protein 4 (Fragment) OS=Homo sapiens OX=9606 GN=CHD4 PE=1 SV=1;tr|A0A2U3TZM0|A0A2U3TZM0_HUMAN Chromodomain-helicase-DNA-binding protein 4 OS=Homo sapiens OX=9606 GN=CHD4 PE=1 SV=1;tr|A0A2R8YD	30	3	3	4	4	4	4	2	1	5	3	286.44	337940000	13170000	23794000	35259000	36219000	50672000	45449000	12905000	6939100	30820000	18820000
P11021	78 kDa glucose-regulated protein	HSPA5	sp|P11021|BIP_HUMAN Endoplasmic reticulum chaperone BiP OS=Homo sapiens OX=9606 GN=HSPA5 PE=1 SV=2	1	2	2	2	0	1	0	1	0	1	1	274.8	43144000	3587600	2265200	4955900	0	2471100	0	1901700	0	1360600	5061700
Q92777	Synapsin-2	SYN2	sp|Q92777|SYN2_HUMAN Synapsin-2 OS=Homo sapiens OX=9606 GN=SYN2 PE=2 SV=4	1	0	1	0	0	0	0	0	0	1	0	257.64	29310000	0	4084900	0	0	0	0	0	0	6242200	0
P21796;C9JI87	Voltage-dependent anion-selective channel protein 1	VDAC1	sp|P21796|VDAC1_HUMAN Voltage-dependent anion-selective channel protein 1 OS=Homo sapiens OX=9606 GN=VDAC1 PE=1 SV=2;tr|C9JI87|C9JI87_HUMAN Voltage-dependent anion-selective channel protein 1 (Fragment) OS=Homo sapiens OX=9606 GN=VDAC1 PE=1 SV=6	2	0	2	0	0	0	0	0	0	2	1	243.43	76151000	0	2836900	0	0	0	0	0	0	8347100	14883000
P01036	Cystatin-S	CST4	sp|P01036|CYTS_HUMAN Cystatin-S OS=Homo sapiens OX=9606 GN=CST4 PE=1 SV=3	1	0	0	0	0	0	0	0	0	0	2	241.47	28059000	0	0	0	0	0	0	0	0	0	21313000
CON__P13647;P13647	Keratin, type II cytoskeletal 5	KRT5	;sp|P13647|K2C5_HUMAN Keratin, type II cytoskeletal 5 OS=Homo sapiens OX=9606 GN=KRT5 PE=1 SV=3	5	0	0	3	2	2	2	2	1	2	4	237.04	248130000	0	0	14028000	4982600	12979000	8519200	21330000	4334900	18618000	96840000
P38646	Stress-70 protein, mitochondrial	HSPA9	sp|P38646|GRP75_HUMAN Stress-70 protein, mitochondrial OS=Homo sapiens OX=9606 GN=HSPA9 PE=1 SV=2	4	3	3	4	1	2	1	2	1	2	3	233.19	146010000	22571000	17193000	16945000	9487300	11468000	7570800	11459000	5689400	13310000	11373000
A0A087WUT6;O60841	Eukaryotic translation initiation factor 5B	EIF5B	tr|A0A087WUT6|A0A087WUT6_HUMAN Eukaryotic translation initiation factor 5B OS=Homo sapiens OX=9606 GN=EIF5B PE=1 SV=1;sp|O60841|IF2P_HUMAN Eukaryotic translation initiation factor 5B OS=Homo sapiens OX=9606 GN=EIF5B PE=1 SV=4	2	3	2	2	2	3	3	2	2	2	2	231.8	393140000	31123000	54585000	10178000	4973000	93733000	52570000	5769200	13515000	32411000	12186000
Q5VTE0;P68104;A0A087WVQ9;A0A087WV01	Putative elongation factor 1-alpha-like 3;Elongation factor 1-alpha 1;Elongation factor 1-alpha	EEF1A1P5;EEF1A1	sp|Q5VTE0|EF1A3_HUMAN Putative elongation factor 1-alpha-like 3 OS=Homo sapiens OX=9606 GN=EEF1A1P5 PE=5 SV=1;sp|P68104|EF1A1_HUMAN Elongation factor 1-alpha 1 OS=Homo sapiens OX=9606 GN=EEF1A1 PE=1 SV=1;tr|A0A087WVQ9|A0A087WVQ9_HUMAN Elongation factor 1-a	6	4	1	4	1	3	1	2	0	3	5	229.11	215120000	41896000	2965100	30900000	0	16624000	4602200	20262000	0	5595700	38207000
P52597	Heterogeneous nuclear ribonucleoprotein F;Heterogeneous nuclear ribonucleoprotein F, N-terminally processed	HNRNPF	sp|P52597|HNRPF_HUMAN Heterogeneous nuclear ribonucleoprotein F OS=Homo sapiens OX=9606 GN=HNRNPF PE=1 SV=3	2	0	0	0	1	0	0	0	0	1	1	223.43	33273000	0	0	0	3054600	0	0	0	0	3089700	7087700
P13010	X-ray repair cross-complementing protein 5	XRCC5	sp|P13010|XRCC5_HUMAN X-ray repair cross-complementing protein 5 OS=Homo sapiens OX=9606 GN=XRCC5 PE=1 SV=3	1	0	0	0	0	0	0	0	0	1	1	222.39	39855000	0	0	0	0	0	0	0	0	5740800	8544200
Q14684	Ribosomal RNA processing protein 1 homolog B	RRP1B	sp|Q14684|RRP1B_HUMAN Ribosomal RNA processing protein 1 homolog B OS=Homo sapiens OX=9606 GN=RRP1B PE=1 SV=3	1	3	2	3	2	4	3	3	2	2	2	219.23	1103800000	127680000	142590000	93136000	86537000	180090000	128880000	71510000	53210000	70148000	39763000
J3KTN0;J3QLN6;J3QR64;J3KSZ0;J3KTB5;J3QL43;J3QS69;J3KT12;E7EQG2;P60842;Q14240	Eukaryotic initiation factor 4A-I;Eukaryotic initiation factor 4A-II;Eukaryotic initiation factor 4A-II, N-terminally processed	EIF4A1;EIF4A2	tr|J3KTN0|J3KTN0_HUMAN Eukaryotic initiation factor 4A-I (Fragment) OS=Homo sapiens OX=9606 GN=EIF4A1 PE=1 SV=1;tr|J3QLN6|J3QLN6_HUMAN Eukaryotic initiation factor 4A-I (Fragment) OS=Homo sapiens OX=9606 GN=EIF4A1 PE=1 SV=1;tr|J3QR64|J3QR64_HUMAN Eukaryoti	11	1	1	1	1	1	1	1	1	1	1	215.52	345670000	51593000	29422000	43635000	34505000	36467000	24643000	22421000	17289000	27831000	10931000
A0A0A0MR02;P45880	Voltage-dependent anion-selective channel protein 2	VDAC2	tr|A0A0A0MR02|A0A0A0MR02_HUMAN Voltage-dependent anion-selective channel protein 2 (Fragment) OS=Homo sapiens OX=9606 GN=VDAC2 PE=1 SV=1;sp|P45880|VDAC2_HUMAN Voltage-dependent anion-selective channel protein 2 OS=Homo sapiens OX=9606 GN=VDAC2 PE=1 SV=2	2	0	0	0	0	0	0	0	0	1	1	212.76	34404000	0	0	0	0	0	0	0	0	2163500	12496000
P07196	Neurofilament light polypeptide	NEFL	sp|P07196|NFL_HUMAN Neurofilament light polypeptide OS=Homo sapiens OX=9606 GN=NEFL PE=1 SV=3	1	0	1	0	1	0	0	0	0	1	0	212.59	34049000	0	2261400	0	1703900	0	0	0	0	9227200	0
P07900	Heat shock protein HSP 90-alpha	HSP90AA1	sp|P07900|HS90A_HUMAN Heat shock protein HSP 90-alpha OS=Homo sapiens OX=9606 GN=HSP90AA1 PE=1 SV=5	5	0	0	1	0	1	0	1	0	2	1	211.97	24711000	0	0	0	0	8235200	0	3821900	0	6608400	1777400
P14618;B4DNK4	Pyruvate kinase PKM;Pyruvate kinase	PKM	sp|P14618|KPYM_HUMAN Pyruvate kinase PKM OS=Homo sapiens OX=9606 GN=PKM PE=1 SV=4;tr|B4DNK4|B4DNK4_HUMAN Pyruvate kinase OS=Homo sapiens OX=9606 GN=PKM PE=1 SV=1	3	2	4	4	2	3	3	3	2	3	4	206.09	325490000	12309000	25192000	22248000	25876000	22935000	22992000	27610000	29799000	25087000	33129000
A0A0G2JIW1;P0DMV9;P0DMV8;V9GZ37	Heat shock 70 kDa protein 1B;Heat shock 70 kDa protein 1A	HSPA1B;HSPA1A	tr|A0A0G2JIW1|A0A0G2JIW1_HUMAN Heat shock 70 kDa protein 1B OS=Homo sapiens OX=9606 GN=HSPA1B PE=1 SV=1;sp|P0DMV9|HS71B_HUMAN Heat shock 70 kDa protein 1B OS=Homo sapiens OX=9606 GN=HSPA1B PE=1 SV=1;sp|P0DMV8|HS71A_HUMAN Heat shock 70 kDa protein 1A OS=Hom	6	7	6	5	4	4	3	5	2	5	5	180.33	393820000	47969000	51673000	56315000	42180000	53804000	13620000	33603000	17034000	33929000	17222000
H7C1L2;Q15459	Splicing factor 3A subunit 1	SF3A1	tr|H7C1L2|H7C1L2_HUMAN Splicing factor 3A subunit 1 (Fragment) OS=Homo sapiens OX=9606 GN=SF3A1 PE=1 SV=1;sp|Q15459|SF3A1_HUMAN Splicing factor 3A subunit 1 OS=Homo sapiens OX=9606 GN=SF3A1 PE=1 SV=1	2	0	0	0	0	0	0	0	0	0	0	180.28	2719200	0	0	0	0	0	0	0	0	0	0
CON__P34955				1	0	0	0	0	0	0	0	0	0	2	175.88	34837000	0	0	0	0	0	0	0	0	0	12021000
P38432	Coilin	COIL	sp|P38432|COIL_HUMAN Coilin OS=Homo sapiens OX=9606 GN=COIL PE=1 SV=1	1	0	0	2	2	2	2	0	0	0	1	174.76	105610000	0	0	31787000	22985000	25541000	21330000	0	0	0	2447300
A0A087WUI2;P22626	Heterogeneous nuclear ribonucleoproteins A2/B1	HNRNPA2B1	tr|A0A087WUI2|A0A087WUI2_HUMAN Heterogeneous nuclear ribonucleoproteins A2/B1 OS=Homo sapiens OX=9606 GN=HNRNPA2B1 PE=1 SV=1;sp|P22626|ROA2_HUMAN Heterogeneous nuclear ribonucleoproteins A2/B1 OS=Homo sapiens OX=9606 GN=HNRNPA2B1 PE=1 SV=2	2	1	1	2	1	1	1	2	1	1	1	153.62	139020000	4021500	4190700	14460000	15045000	14396000	12364000	10141000	8728600	11484000	13406000
P00558;P07205	Phosphoglycerate kinase 1;Phosphoglycerate kinase 2	PGK1;PGK2	sp|P00558|PGK1_HUMAN Phosphoglycerate kinase 1 OS=Homo sapiens OX=9606 GN=PGK1 PE=1 SV=3;sp|P07205|PGK2_HUMAN Phosphoglycerate kinase 2 OS=Homo sapiens OX=9606 GN=PGK2 PE=1 SV=3	2	0	0	0	0	0	0	0	0	1	1	143.07	44203000	0	0	0	0	0	0	0	0	2779000	10306000
E9PPZ7;E9PMD4;Q08945	FACT complex subunit SSRP1	SSRP1	tr|E9PPZ7|E9PPZ7_HUMAN FACT complex subunit SSRP1 (Fragment) OS=Homo sapiens OX=9606 GN=SSRP1 PE=1 SV=2;tr|E9PMD4|E9PMD4_HUMAN FACT complex subunit SSRP1 (Fragment) OS=Homo sapiens OX=9606 GN=SSRP1 PE=1 SV=2;sp|Q08945|SSRP1_HUMAN FACT complex subunit SSRP1	3	0	0	0	0	0	0	0	0	0	0	140.76	2878200	0	0	0	0	0	0	0	0	0	0
G3V1A4;E9PK25;P23528;E9PQB7;E9PP50	Cofilin-1	CFL1	tr|G3V1A4|G3V1A4_HUMAN Cofilin 1 (Non-muscle), isoform CRA_a OS=Homo sapiens OX=9606 GN=CFL1 PE=1 SV=1;tr|E9PK25|E9PK25_HUMAN Cofilin-1 OS=Homo sapiens OX=9606 GN=CFL1 PE=1 SV=1;sp|P23528|COF1_HUMAN Cofilin-1 OS=Homo sapiens OX=9606 GN=CFL1 PE=1 SV=3;tr|E9	8	0	1	1	1	0	0	1	0	1	2	138.11	27437000	0	2674100	3563200	0	0	0	3407300	0	0	6691100
CON__P02662				1	2	2	3	2	2	2	1	2	2	3	135.56	1086200000	66729000	56568000	101740000	116580000	113050000	46615000	49545000	66247000	56435000	86898000
E9PDR0;C9JQS9;P05166;E7ETT4;E7EUY3;E7ETT1;E7EX59;F8WBI9;E9PEC3;E7ENC1	Propionyl-CoA carboxylase beta chain, mitochondrial	PCCB	tr|E9PDR0|E9PDR0_HUMAN Propionyl-CoA carboxylase beta chain, mitochondrial OS=Homo sapiens OX=9606 GN=PCCB PE=1 SV=1;tr|C9JQS9|C9JQS9_HUMAN Propionyl-CoA carboxylase beta chain, mitochondrial OS=Homo sapiens OX=9606 GN=PCCB PE=1 SV=1;sp|P05166|PCCB_HUMAN P	14	3	3	7	3	6	4	6	3	4	6	128.96	565810000	21815000	26791000	48217000	23110000	47226000	32766000	50714000	33456000	39513000	112860000
J3QSY6;P16615	Sarcoplasmic/endoplasmic reticulum calcium ATPase 2	ATP2A2	tr|J3QSY6|J3QSY6_HUMAN Sarcoplasmic/endoplasmic reticulum calcium ATPase 2 OS=Homo sapiens OX=9606 GN=ATP2A2 PE=1 SV=1;sp|P16615|AT2A2_HUMAN Sarcoplasmic/endoplasmic reticulum calcium ATPase 2 OS=Homo sapiens OX=9606 GN=ATP2A2 PE=1 SV=1	2	0	0	0	0	0	0	0	0	0	0	128.74	13580000	0	0	0	0	0	0	0	0	0	0
P49327;A0A0U1RQF0	Fatty acid synthase;[Acyl-carrier-protein] S-acetyltransferase;[Acyl-carrier-protein] S-malonyltransferase;3-oxoacyl-[acyl-carrier-protein] synthase;3-oxoacyl-[acyl-carrier-protein] reductase;3-hydroxyacyl-[acyl-carrier-protein] dehydratase;Enoyl-[acyl-carrier-protein] reductase;Oleoyl-[acyl-carrier-protein] hydrolase	FASN	sp|P49327|FAS_HUMAN Fatty acid synthase OS=Homo sapiens OX=9606 GN=FASN PE=1 SV=3;tr|A0A0U1RQF0|A0A0U1RQF0_HUMAN Fatty acid synthase OS=Homo sapiens OX=9606 GN=FASN PE=1 SV=1	4	5	6	7	2	4	2	3	2	3	3	128.16	247140000	19655000	29853000	20940000	4188300	15067000	7813800	11324000	5981400	8437200	10706000
P09874	Poly [ADP-ribose] polymerase 1	PARP1	sp|P09874|PARP1_HUMAN Poly [ADP-ribose] polymerase 1 OS=Homo sapiens OX=9606 GN=PARP1 PE=1 SV=4	1	2	2	2	2	3	2	1	2	2	1	123.57	312870000	16615000	25505000	24725000	20816000	54771000	46091000	13881000	3880300	17111000	15359000
Q9UQ35	Serine/arginine repetitive matrix protein 2	SRRM2	sp|Q9UQ35|SRRM2_HUMAN Serine/arginine repetitive matrix protein 2 OS=Homo sapiens OX=9606 GN=SRRM2 PE=1 SV=2	3	2	2	3	3	4	2	2	0	0	2	115.57	261980000	15027000	12346000	40646000	53725000	60211000	52597000	11588000	0	0	13484000
P08238	Heat shock protein HSP 90-beta	HSP90AB1	sp|P08238|HS90B_HUMAN Heat shock protein HSP 90-beta OS=Homo sapiens OX=9606 GN=HSP90AB1 PE=1 SV=4	2	3	5	1	2	0	0	0	0	2	3	115.08	92644000	10024000	13763000	666030	774340	0	0	0	0	8816800	20660000
A0A087WYC1;P34932;A0A087WTS8	Heat shock 70 kDa protein 4	HSPA4	tr|A0A087WYC1|A0A087WYC1_HUMAN Heat shock 70 kDa protein 4 OS=Homo sapiens OX=9606 GN=HSPA4 PE=1 SV=1;sp|P34932|HSP74_HUMAN Heat shock 70 kDa protein 4 OS=Homo sapiens OX=9606 GN=HSPA4 PE=1 SV=4;tr|A0A087WTS8|A0A087WTS8_HUMAN Heat shock 70 kDa protein 4 OS	6	2	2	2	1	2	0	2	1	1	0	114.27	27192000	5850900	4905800	1237900	0	3315500	0	4764700	2461800	934350	0
CON__Q6ISB0;CON__Q9NSB2;Q9NSB2	Keratin, type II cuticular Hb4	KRT84	;;sp|Q9NSB2|KRT84_HUMAN Keratin, type II cuticular Hb4 OS=Homo sapiens OX=9606 GN=KRT84 PE=2 SV=2	3	0	0	0	0	2	1	0	0	0	0	108.91	29092000	0	0	0	0	23423000	2356000	0	0	0	0
Q5T6H3;Q5T6H2;Q9NQW7	Xaa-Pro aminopeptidase 1	XPNPEP1	tr|Q5T6H3|Q5T6H3_HUMAN Xaa-Pro aminopeptidase 1 (Fragment) OS=Homo sapiens OX=9606 GN=XPNPEP1 PE=1 SV=1;tr|Q5T6H2|Q5T6H2_HUMAN Xaa-Pro aminopeptidase 1 (Fragment) OS=Homo sapiens OX=9606 GN=XPNPEP1 PE=1 SV=1;sp|Q9NQW7|XPP1_HUMAN Xaa-Pro aminopeptidase 1 OS	3	0	0	0	0	0	0	0	0	0	0	107.93	0	0	0	0	0	0	0	0	0	0	0
Q5T6W2;P61978	Heterogeneous nuclear ribonucleoprotein K	HNRNPK	tr|Q5T6W2|Q5T6W2_HUMAN Heterogeneous nuclear ribonucleoprotein K (Fragment) OS=Homo sapiens OX=9606 GN=HNRNPK PE=1 SV=1;sp|P61978|HNRPK_HUMAN Heterogeneous nuclear ribonucleoprotein K OS=Homo sapiens OX=9606 GN=HNRNPK PE=1 SV=1	2	1	1	1	1	1	1	1	0	2	1	104.78	95587000	6803800	2309300	14488000	9829000	14074000	4910600	5844900	0	5575500	6421200
P14174	Macrophage migration inhibitory factor	MIF	sp|P14174|MIF_HUMAN Macrophage migration inhibitory factor OS=Homo sapiens OX=9606 GN=MIF PE=1 SV=4	1	1	0	1	0	1	0	1	0	0	1	100.79	17490000	2721900	0	2094000	0	0	0	2483000	0	0	649840
H0YHG0;F8VZQ9;P82979	SAP domain-containing ribonucleoprotein	SARNP	tr|H0YHG0|H0YHG0_HUMAN Uncharacterized protein (Fragment) OS=Homo sapiens OX=9606 PE=1 SV=1;tr|F8VZQ9|F8VZQ9_HUMAN SAP domain-containing ribonucleoprotein OS=Homo sapiens OX=9606 GN=SARNP PE=1 SV=1;sp|P82979|SARNP_HUMAN SAP domain-containing ribonucleoprot	3	0	0	0	0	0	0	0	0	0	0	99.002	8905900	0	0	0	0	0	0	0	0	0	0
P12277;G3V4N7	Creatine kinase B-type	CKB	sp|P12277|KCRB_HUMAN Creatine kinase B-type OS=Homo sapiens OX=9606 GN=CKB PE=1 SV=1;tr|G3V4N7|G3V4N7_HUMAN Creatine kinase B-type (Fragment) OS=Homo sapiens OX=9606 GN=CKB PE=1 SV=1	4	1	1	2	2	2	0	2	1	3	1	94.419	49903000	1417400	2536400	7590900	9884200	7690800	0	5670200	2650800	10169000	0
Q00266;P31153	S-adenosylmethionine synthase isoform type-1;S-adenosylmethionine synthase isoform type-2	MAT1A;MAT2A	sp|Q00266|METK1_HUMAN S-adenosylmethionine synthase isoform type-1 OS=Homo sapiens OX=9606 GN=MAT1A PE=1 SV=2;sp|P31153|METK2_HUMAN S-adenosylmethionine synthase isoform type-2 OS=Homo sapiens OX=9606 GN=MAT2A PE=1 SV=1	2	2	0	1	0	1	0	1	0	0	1	93.895	68571000	29478000	0	11857000	0	11006000	0	6138100	0	0	4454900
A0A1C7CYX9;Q16555	Dihydropyrimidinase-related protein 2	DPYSL2	tr|A0A1C7CYX9|A0A1C7CYX9_HUMAN Dihydropyrimidinase-related protein 2 OS=Homo sapiens OX=9606 GN=DPYSL2 PE=1 SV=1;sp|Q16555|DPYL2_HUMAN Dihydropyrimidinase-related protein 2 OS=Homo sapiens OX=9606 GN=DPYSL2 PE=1 SV=1	5	0	0	0	0	0	0	0	0	1	0	92.85	17834000	0	0	0	0	0	0	0	0	2285800	0
A0A0B4J1R6;P29401	Transketolase	TKT	tr|A0A0B4J1R6|A0A0B4J1R6_HUMAN Transketolase OS=Homo sapiens OX=9606 GN=TKT PE=1 SV=1;sp|P29401|TKT_HUMAN Transketolase OS=Homo sapiens OX=9606 GN=TKT PE=1 SV=3	2	0	0	0	0	0	0	0	0	0	1	91.142	59375000	0	0	0	0	0	0	0	0	0	4876200
G3V2K7;P49755	Transmembrane emp24 domain-containing protein 10	TMED10	tr|G3V2K7|G3V2K7_HUMAN Transmembrane emp24 domain-containing protein 10 OS=Homo sapiens OX=9606 GN=TMED10 PE=1 SV=1;sp|P49755|TMEDA_HUMAN Transmembrane emp24 domain-containing protein 10 OS=Homo sapiens OX=9606 GN=TMED10 PE=1 SV=2	2	0	0	0	0	0	0	0	0	0	1	89.205	7302600	0	0	0	0	0	0	0	0	0	2989100
CON__P05787;P05787;F8VUG2;F8W1U3	Keratin, type II cytoskeletal 8	KRT8	;sp|P05787|K2C8_HUMAN Keratin, type II cytoskeletal 8 OS=Homo sapiens OX=9606 GN=KRT8 PE=1 SV=7;tr|F8VUG2|F8VUG2_HUMAN Keratin, type II cytoskeletal 8 (Fragment) OS=Homo sapiens OX=9606 GN=KRT8 PE=1 SV=1;tr|F8W1U3|F8W1U3_HUMAN Keratin, type II cytoskeletal	7	0	0	0	0	0	0	0	0	2	1	86.621	21609000	0	0	0	0	0	0	0	0	4338900	13051000
O15067;J3KT98	Phosphoribosylformylglycinamidine synthase	PFAS	sp|O15067|PUR4_HUMAN Phosphoribosylformylglycinamidine synthase OS=Homo sapiens OX=9606 GN=PFAS PE=1 SV=4;tr|J3KT98|J3KT98_HUMAN Phosphoribosylformylglycinamidine synthase (Fragment) OS=Homo sapiens OX=9606 GN=PFAS PE=1 SV=8	2	0	1	0	0	0	0	0	1	0	0	84.692	5844400	0	2621600	0	0	0	0	0	1549500	0	0
M0R116;A0A2R8YEY8;A0A0A0MT26;P13637	Sodium/potassium-transporting ATPase subunit alpha-3	ATP1A3	tr|M0R116|M0R116_HUMAN Sodium/potassium-transporting ATPase subunit alpha OS=Homo sapiens OX=9606 GN=ATP1A3 PE=1 SV=1;tr|A0A2R8YEY8|A0A2R8YEY8_HUMAN Sodium/potassium-transporting ATPase subunit alpha OS=Homo sapiens OX=9606 PE=3 SV=1;tr|A0A0A0MT26|A0A0A0MT	5	0	0	0	0	0	0	0	0	3	0	82.63	19319000	0	0	0	0	0	0	0	0	5462300	0
P0C0S8;P04908;A0A0U1RR32;A0A0U1RRH7;Q99878;H0YFX9;Q16777;Q96KK5;Q9BTM1;Q93077;Q7L7L0;Q6FI13;P20671;Q71UI9;P0C0S5;C9J0D1;A0A494C189;Q96QV6;A0A3B3IS11;P16104;C9J386	Histone H2A type 1;Histone H2A type 1-B/E;Histone H2A type 1-J;Histone H2A;Histone H2A type 2-C;Histone H2A type 1-H;Histone H2A.J;Histone H2A type 1-C;Histone H2A type 3;Histone H2A type 2-A;Histone H2A type 1-D;Histone H2A.V;Histone H2A.Z;Histone H2A type 1-A;Histone H2AX	HIST1H2AG;HIST1H2AB;HIST1H2AJ;H2AFJ;HIST2H2AC;HIST1H2AH;HIST1H2AC;HIST3H2A;HIST2H2AA3;HIST1H2AD;H2AFV;H2AFZ;HIST1H2AA;H2AFX	sp|P0C0S8|H2A1_HUMAN Histone H2A type 1 OS=Homo sapiens OX=9606 GN=H2AC11 PE=1 SV=2;sp|P04908|H2A1B_HUMAN Histone H2A type 1-B/E OS=Homo sapiens OX=9606 GN=H2AC4 PE=1 SV=2;tr|A0A0U1RR32|A0A0U1RR32_HUMAN Histone H2A OS=Homo sapiens OX=9606 GN=hCG_2039566 PE	21	1	0	1	1	1	1	0	0	0	2	81.134	112550000	7018600	0	15497000	0	39718000	13304000	0	0	0	10993000
A0A024RAC6;Q14241	Transcription elongation factor B polypeptide 3	TCEB3	tr|A0A024RAC6|A0A024RAC6_HUMAN Elongin-A OS=Homo sapiens OX=9606 GN=ELOA PE=1 SV=1;sp|Q14241|ELOA1_HUMAN Elongin-A OS=Homo sapiens OX=9606 GN=ELOA PE=1 SV=2	2	2	2	1	1	3	1	1	0	1	0	80.794	104640000	12688000	15693000	5916200	4698400	33122000	13720000	4533100	0	8524600	0
P06576;H0YH81;F8W0P7	ATP synthase subunit beta, mitochondrial;ATP synthase subunit beta	ATP5B	sp|P06576|ATPB_HUMAN ATP synthase subunit beta, mitochondrial OS=Homo sapiens OX=9606 GN=ATP5F1B PE=1 SV=3;tr|H0YH81|H0YH81_HUMAN ATP synthase subunit beta (Fragment) OS=Homo sapiens OX=9606 GN=ATP5F1B PE=1 SV=1;tr|F8W0P7|F8W0P7_HUMAN ATP synthase subunit	5	3	1	3	1	1	0	1	0	2	1	76.042	54236000	7398500	1261900	10712000	3509900	0	0	1071900	0	10284000	901650
P35579	Myosin-9	MYH9	sp|P35579|MYH9_HUMAN Myosin-9 OS=Homo sapiens OX=9606 GN=MYH9 PE=1 SV=4	2	2	2	2	2	1	1	0	0	4	0	73.287	59573000	6684200	5640100	6820400	4053300	3449100	4727100	0	0	22405000	0
P18583;J3QSZ5;H7C1M2	Protein SON	SON	sp|P18583|SON_HUMAN Protein SON OS=Homo sapiens OX=9606 GN=SON PE=1 SV=4;tr|J3QSZ5|J3QSZ5_HUMAN Protein SON OS=Homo sapiens OX=9606 GN=SON PE=1 SV=1;tr|H7C1M2|H7C1M2_HUMAN Protein SON (Fragment) OS=Homo sapiens OX=9606 GN=SON PE=1 SV=1	6	1	0	1	1	1	1	1	0	0	1	73.249	41617000	4921600	0	0	3814900	13186000	0	8141400	0	0	11552000
A0A1X7SBZ2;A0A5H1ZRQ2;A0A1W2PQ51;Q92841	Probable ATP-dependent RNA helicase DDX17	DDX17	tr|A0A1X7SBZ2|A0A1X7SBZ2_HUMAN Probable ATP-dependent RNA helicase DDX17 OS=Homo sapiens OX=9606 GN=DDX17 PE=1 SV=1;tr|A0A5H1ZRQ2|A0A5H1ZRQ2_HUMAN Probable ATP-dependent RNA helicase DDX17 OS=Homo sapiens OX=9606 GN=DDX17 PE=1 SV=1;tr|A0A1W2PQ51|A0A1W2PQ51	7	3	2	4	3	4	2	2	1	1	1	72.92	199960000	11250000	7779000	37884000	36136000	38276000	35114000	6383400	2362600	3459300	4084700
Q99832	T-complex protein 1 subunit eta	CCT7	sp|Q99832|TCPH_HUMAN T-complex protein 1 subunit eta OS=Homo sapiens OX=9606 GN=CCT7 PE=1 SV=2	2	2	1	0	1	0	0	0	0	1	0	68.546	25712000	1155100	4141100	0	2540600	0	0	0	0	2726000	0
CON__ENSEMBL:ENSBTAP00000018574				1	0	0	0	0	0	0	0	0	1	1	67.448	18742000	0	0	0	0	0	0	0	0	2159100	5344800
P55795	Heterogeneous nuclear ribonucleoprotein H2	HNRNPH2	sp|P55795|HNRH2_HUMAN Heterogeneous nuclear ribonucleoprotein H2 OS=Homo sapiens OX=9606 GN=HNRNPH2 PE=1 SV=1	1	0	0	0	0	0	0	0	0	1	1	66.972	22762000	0	0	0	0	0	0	0	0	5802100	1861300
P14923	Junction plakoglobin	JUP	sp|P14923|PLAK_HUMAN Junction plakoglobin OS=Homo sapiens OX=9606 GN=JUP PE=1 SV=3	16	0	0	0	1	1	1	0	1	1	3	66.449	43313000	0	0	0	1855200	3143900	1860700	0	2446500	2857500	12885000
Q5JP53;P07437;A0A0B4J269	Tubulin beta chain	TUBB;TUBB3	tr|Q5JP53|Q5JP53_HUMAN Tubulin beta chain OS=Homo sapiens OX=9606 GN=TUBB PE=1 SV=1;sp|P07437|TBB5_HUMAN Tubulin beta chain OS=Homo sapiens OX=9606 GN=TUBB PE=1 SV=2;tr|A0A0B4J269|A0A0B4J269_HUMAN G_PROTEIN_RECEP_F1_2 domain-containing protein OS=Homo sapi	3	1	1	1	1	1	0	1	0	1	1	66.337	105780000	12901000	16540000	11413000	14963000	5898900	0	6413200	0	6790100	7292100
G5E9G0;P39023;H7C3M2;B5MCW2;H7C422	60S ribosomal protein L3	RPL3	tr|G5E9G0|G5E9G0_HUMAN 60S ribosomal protein L3 OS=Homo sapiens OX=9606 GN=RPL3 PE=1 SV=1;sp|P39023|RL3_HUMAN 60S ribosomal protein L3 OS=Homo sapiens OX=9606 GN=RPL3 PE=1 SV=2;tr|H7C3M2|H7C3M2_HUMAN 60S ribosomal protein L3 (Fragment) OS=Homo sapiens OX=9	5	3	1	1	1	2	1	1	1	2	1	65.072	236540000	17750000	20601000	8966300	7795600	35428000	14325000	19847000	7837100	21926000	9844500
H0YA55;D6RHD5;B7WNR0;A0A0C4DGB6;CON__P02768-1;P02768;C9JKR2	Serum albumin	ALB	tr|H0YA55|H0YA55_HUMAN Serum albumin (Fragment) OS=Homo sapiens OX=9606 GN=ALB PE=1 SV=1;tr|D6RHD5|D6RHD5_HUMAN Serum albumin OS=Homo sapiens OX=9606 GN=ALB PE=1 SV=1;tr|B7WNR0|B7WNR0_HUMAN Serum albumin OS=Homo sapiens OX=9606 GN=ALB PE=1 SV=1;tr|A0A0C4DG	9	1	0	1	1	1	2	1	2	2	1	64.799	90909000	6257300	0	0	1716400	3599700	11055000	0	9753800	40904000	634110
X6R2L4;M0R0Y3;Q9Y230	RuvB-like 2	RUVBL2	tr|X6R2L4|X6R2L4_HUMAN RuvB-like helicase OS=Homo sapiens OX=9606 GN=RUVBL2 PE=1 SV=1;tr|M0R0Y3|M0R0Y3_HUMAN RuvB-like helicase OS=Homo sapiens OX=9606 GN=RUVBL2 PE=1 SV=1;sp|Q9Y230|RUVB2_HUMAN RuvB-like 2 OS=Homo sapiens OX=9606 GN=RUVBL2 PE=1 SV=3	3	0	0	0	0	0	0	0	0	0	0	62.113	1224600	0	0	0	0	0	0	0	0	0	0
P62820;E9PLD0;E7END7	Ras-related protein Rab-1A	RAB1A;RAB1B	sp|P62820|RAB1A_HUMAN Ras-related protein Rab-1A OS=Homo sapiens OX=9606 GN=RAB1A PE=1 SV=3;tr|E9PLD0|E9PLD0_HUMAN Ras-related protein Rab-1B OS=Homo sapiens OX=9606 GN=RAB1B PE=1 SV=1;tr|E7END7|E7END7_HUMAN Ras-related protein Rab-1A OS=Homo sapiens OX=96	3	1	0	1	0	0	0	0	0	0	1	61.701	23502000	11998000	0	3809400	0	0	0	0	0	0	2215600
P28074	Proteasome subunit beta type-5	PSMB5	sp|P28074|PSB5_HUMAN Proteasome subunit beta type-5 OS=Homo sapiens OX=9606 GN=PSMB5 PE=1 SV=3	1	0	0	0	0	0	0	0	0	0	1	61.363	1541000	0	0	0	0	0	0	0	0	0	0
I3L397;I3L504;P63241;F8WCJ1;C9J7B5;C9J4W5;Q9GZV4;Q6IS14	Eukaryotic translation initiation factor 5A;Eukaryotic translation initiation factor 5A-1;Eukaryotic translation initiation factor 5A-2;Eukaryotic translation initiation factor 5A-1-like	EIF5A;EIF5A2;EIF5AL1	tr|I3L397|I3L397_HUMAN Eukaryotic translation initiation factor 5A (Fragment) OS=Homo sapiens OX=9606 GN=EIF5A PE=1 SV=8;tr|I3L504|I3L504_HUMAN Eukaryotic translation initiation factor 5A-1 OS=Homo sapiens OX=9606 GN=EIF5A PE=1 SV=1;sp|P63241|IF5A1_HUMAN E	8	2	0	1	1	1	1	1	0	1	1	61.029	128460000	14174000	0	7582300	18811000	17316000	2029400	11762000	0	8769700	5062700
H0YJC4;G3V5Z7;P60900	Proteasome subunit alpha type;Proteasome subunit alpha type-6	PSMA6	tr|H0YJC4|H0YJC4_HUMAN Proteasome subunit alpha type-6 (Fragment) OS=Homo sapiens OX=9606 GN=PSMA6 PE=1 SV=1;tr|G3V5Z7|G3V5Z7_HUMAN Proteasome subunit alpha type OS=Homo sapiens OX=9606 GN=PSMA6 PE=1 SV=1;sp|P60900|PSA6_HUMAN Proteasome subunit alpha type-	3	0	1	0	0	0	0	0	0	0	0	60.941	13059000	0	1485900	0	0	0	0	0	0	0	0
Q9Y5S9	RNA-binding protein 8A	RBM8A	sp|Q9Y5S9|RBM8A_HUMAN RNA-binding protein 8A OS=Homo sapiens OX=9606 GN=RBM8A PE=1 SV=1	1	0	0	0	0	0	0	0	0	0	0	59.658	8844400	0	0	0	0	0	0	0	0	0	0
B4DJF2;I3L3T1;K7EIT4;P62258	14-3-3 protein epsilon	YWHAE	tr|B4DJF2|B4DJF2_HUMAN 14-3-3 protein epsilon OS=Homo sapiens OX=9606 GN=YWHAE PE=1 SV=1;tr|I3L3T1|I3L3T1_HUMAN 14-3-3 protein epsilon OS=Homo sapiens OX=9606 GN=YWHAE PE=1 SV=1;tr|K7EIT4|K7EIT4_HUMAN 14-3-3 protein epsilon (Fragment) OS=Homo sapiens OX=96	4	0	0	0	0	0	0	0	0	0	1	58.165	4031500	0	0	0	0	0	0	0	0	0	1930600
Q9P258	Protein RCC2	RCC2	sp|Q9P258|RCC2_HUMAN Protein RCC2 OS=Homo sapiens OX=9606 GN=RCC2 PE=1 SV=2	1	0	2	0	0	0	1	0	0	0	2	57.127	27650000	0	6763400	0	0	0	1688700	0	0	0	5385400
E7EN95;O75369	Filamin-B	FLNB	tr|E7EN95|E7EN95_HUMAN Filamin-B OS=Homo sapiens OX=9606 GN=FLNB PE=1 SV=1;sp|O75369|FLNB_HUMAN Filamin-B OS=Homo sapiens OX=9606 GN=FLNB PE=1 SV=2	2	0	0	0	0	0	0	0	0	0	3	56.925	36240000	0	0	0	0	0	0	0	0	0	10371000
P22314	Ubiquitin-like modifier-activating enzyme 1	UBA1	sp|P22314|UBA1_HUMAN Ubiquitin-like modifier-activating enzyme 1 OS=Homo sapiens OX=9606 GN=UBA1 PE=1 SV=3	7	1	0	0	0	0	0	0	0	0	1	55.478	25651000	10371000	0	0	0	0	0	0	0	0	2116900
Q8IY81	pre-rRNA processing protein FTSJ3	FTSJ3	sp|Q8IY81|SPB1_HUMAN pre-rRNA 2-O-ribose RNA methyltransferase FTSJ3 OS=Homo sapiens OX=9606 GN=FTSJ3 PE=1 SV=2	1	1	1	1	1	1	1	1	1	1	1	55.076	73283000	5891200	2742200	8433600	2883600	12118000	5923100	11209000	2475400	3623100	8654200
P15924	Desmoplakin	DSP	sp|P15924|DESP_HUMAN Desmoplakin OS=Homo sapiens OX=9606 GN=DSP PE=1 SV=3	1	0	0	1	1	1	3	2	1	1	3	54.476	65494000	0	0	2821900	2443200	6400400	11884000	1001800	4082000	7021600	4901900
CON__Q3SX09				1	0	0	0	0	0	0	0	1	0	1	54.037	3457500	0	0	0	0	0	0	0	0	0	0
P31942	Heterogeneous nuclear ribonucleoprotein H3	HNRNPH3	sp|P31942|HNRH3_HUMAN Heterogeneous nuclear ribonucleoprotein H3 OS=Homo sapiens OX=9606 GN=HNRNPH3 PE=1 SV=2	1	0	0	0	0	0	0	0	0	1	1	54.011	26809000	0	0	0	0	0	0	0	0	2283400	7882700
P30101	Protein disulfide-isomerase A3	PDIA3	sp|P30101|PDIA3_HUMAN Protein disulfide-isomerase A3 OS=Homo sapiens OX=9606 GN=PDIA3 PE=1 SV=4	1	1	1	1	1	1	1	1	0	0	1	52.744	103440000	13205000	16832000	8869800	12435000	10377000	12349000	6845700	0	0	4408800
F8VZ49;F8W6I7;Q32P51;P09651;F8VTQ5;F8W646	Heterogeneous nuclear ribonucleoprotein A1-like 2;Heterogeneous nuclear ribonucleoprotein A1;Heterogeneous nuclear ribonucleoprotein A1, N-terminally processed	HNRNPA1;HNRNPA1L2	tr|F8VZ49|F8VZ49_HUMAN Heterogeneous nuclear ribonucleoprotein A1 (Fragment) OS=Homo sapiens OX=9606 GN=HNRNPA1 PE=1 SV=1;tr|F8W6I7|F8W6I7_HUMAN Heterogeneous nuclear ribonucleoprotein A1 OS=Homo sapiens OX=9606 GN=HNRNPA1 PE=1 SV=2;sp|Q32P51|RA1L2_HUMAN H	9	1	1	3	2	1	1	2	1	1	2	50.663	126600000	4255100	4015500	22539000	10553000	10708000	7301800	18346000	3826200	4456000	20921000
A0A087WVQ6;Q00610	Clathrin heavy chain;Clathrin heavy chain 1	CLTC	tr|A0A087WVQ6|A0A087WVQ6_HUMAN Clathrin heavy chain OS=Homo sapiens OX=9606 GN=CLTC PE=1 SV=1;sp|Q00610|CLH1_HUMAN Clathrin heavy chain 1 OS=Homo sapiens OX=9606 GN=CLTC PE=1 SV=5	7	4	3	1	0	0	0	0	0	0	0	50.002	40157000	13599000	14496000	807300	0	0	0	0	0	0	0
K7EMA7;H7BY10;K7ERT8;A8MUS3;P62750;K7EJV9	60S ribosomal protein L23a	RPL23A	tr|K7EMA7|K7EMA7_HUMAN 60S ribosomal protein L23a OS=Homo sapiens OX=9606 GN=RPL23A PE=1 SV=1;tr|H7BY10|H7BY10_HUMAN 60S ribosomal protein L23a (Fragment) OS=Homo sapiens OX=9606 GN=RPL23A PE=1 SV=1;tr|K7ERT8|K7ERT8_HUMAN 60S ribosomal protein L23a (Fragme	6	1	1	1	0	1	0	0	1	1	1	49.889	60485000	17628000	17015000	457380	0	692940	0	0	6811900	9497800	1314300
Q96SB4;H3BLV9	SRSF protein kinase 1	SRPK1	sp|Q96SB4|SRPK1_HUMAN SRSF protein kinase 1 OS=Homo sapiens OX=9606 GN=SRPK1 PE=1 SV=2;tr|H3BLV9|H3BLV9_HUMAN SRSF protein kinase 1 (Fragment) OS=Homo sapiens OX=9606 GN=SRPK1 PE=1 SV=1	3	1	2	2	0	2	1	0	0	1	0	49.869	79899000	5432900	12336000	6358400	0	18198000	17271000	0	0	4388400	0
Q07065	Cytoskeleton-associated protein 4	CKAP4	sp|Q07065|CKAP4_HUMAN Cytoskeleton-associated protein 4 OS=Homo sapiens OX=9606 GN=CKAP4 PE=1 SV=2	1	1	1	1	0	1	1	0	0	0	0	49.487	19181000	2803800	4058900	3176500	0	3194400	4172500	0	0	0	0
J3QR48;Q14974	Importin subunit beta-1	KPNB1	tr|J3QR48|J3QR48_HUMAN Importin subunit beta-1 (Fragment) OS=Homo sapiens OX=9606 GN=KPNB1 PE=1 SV=8;sp|Q14974|IMB1_HUMAN Importin subunit beta-1 OS=Homo sapiens OX=9606 GN=KPNB1 PE=1 SV=2	2	1	0	0	0	0	0	0	0	0	0	49.487	18959000	18959000	0	0	0	0	0	0	0	0	0
A0A3B3IS06;E7ETY2;Q13428;A0A2R8Y4M7;A0A2R8Y857;H0Y8Y7	Treacle protein	TCOF1	tr|A0A3B3IS06|A0A3B3IS06_HUMAN Treacle protein (Fragment) OS=Homo sapiens OX=9606 GN=TCOF1 PE=1 SV=1;tr|E7ETY2|E7ETY2_HUMAN Treacle protein OS=Homo sapiens OX=9606 GN=TCOF1 PE=1 SV=1;sp|Q13428|TCOF_HUMAN Treacle protein OS=Homo sapiens OX=9606 GN=TCOF1 PE=	6	1	1	1	1	2	0	2	1	1	1	49.272	79851000	2316000	10300000	14933000	3892600	7393700	0	16428000	10850000	1493700	6535300
Q5RI18;A0A1W2PP35;A0A1W2PPS1;Q00839;A0A1W2PRI6;A0A1W2PRZ7;A0A1W2PQ74;A0A1W2PQL0;A0A1W2PP34;A0A1W2PPL4;A0A1W2PPH7;A0A1X7SBS1	Heterogeneous nuclear ribonucleoprotein U	HNRNPU	tr|Q5RI18|Q5RI18_HUMAN Heterogeneous nuclear ribonucleoprotein U OS=Homo sapiens OX=9606 GN=HNRNPU PE=1 SV=9;tr|A0A1W2PP35|A0A1W2PP35_HUMAN Heterogeneous nuclear ribonucleoprotein U (Fragment) OS=Homo sapiens OX=9606 GN=HNRNPU PE=1 SV=1;tr|A0A1W2PPS1|A0A1W	12	1	1	1	1	1	2	1	1	1	1	49.234	209970000	7713400	13102000	13934000	17116000	32714000	26000000	8202300	11104000	22110000	7569900
B4DUR8;P49368	T-complex protein 1 subunit gamma	CCT3	tr|B4DUR8|B4DUR8_HUMAN T-complex protein 1 subunit gamma OS=Homo sapiens OX=9606 GN=CCT3 PE=1 SV=1;sp|P49368|TCPG_HUMAN T-complex protein 1 subunit gamma OS=Homo sapiens OX=9606 GN=CCT3 PE=1 SV=4	5	3	1	2	2	1	0	2	0	1	0	48.411	38689000	15680000	2690200	6802700	1495200	3154400	0	4768900	0	2083000	0
P31930	Cytochrome b-c1 complex subunit 1, mitochondrial	UQCRC1	sp|P31930|QCR1_HUMAN Cytochrome b-c1 complex subunit 1, mitochondrial OS=Homo sapiens OX=9606 GN=UQCRC1 PE=1 SV=3	1	0	0	0	0	0	0	0	0	1	1	47.973	9061500	0	0	0	0	0	0	0	0	0	0
P01833	Polymeric immunoglobulin receptor;Secretory component	PIGR	sp|P01833|PIGR_HUMAN Polymeric immunoglobulin receptor OS=Homo sapiens OX=9606 GN=PIGR PE=1 SV=4	1	0	0	0	0	0	0	0	0	0	3	47.753	19563000	0	0	0	0	0	0	0	0	0	18149000
Q9BZE4	Nucleolar GTP-binding protein 1	GTPBP4	sp|Q9BZE4|NOG1_HUMAN Nucleolar GTP-binding protein 1 OS=Homo sapiens OX=9606 GN=GTPBP4 PE=1 SV=3	1	2	1	2	2	3	2	0	0	2	1	47.402	95499000	4947200	4040000	11267000	5459700	33143000	11340000	0	0	5341000	4378000
C9J9K3;A0A0C4DG17;P08865	40S ribosomal protein SA	RPSA	tr|C9J9K3|C9J9K3_HUMAN 40S ribosomal protein SA (Fragment) OS=Homo sapiens OX=9606 GN=RPSA PE=1 SV=8;tr|A0A0C4DG17|A0A0C4DG17_HUMAN 40S ribosomal protein SA OS=Homo sapiens OX=9606 GN=RPSA PE=1 SV=1;sp|P08865|RSSA_HUMAN 40S ribosomal protein SA OS=Homo sap	4	1	2	1	2	1	0	0	1	1	0	46.767	25407000	1063200	4643000	2213400	7285900	2050600	0	0	0	0	0
G3V5X6;G3V3K6;G3V251;G3V4W0;B4DY08;B2R5W2;G3V4C1;B4DSU6;G3V555;G3V575;G3V576;G3V2Q1;P07910	Heterogeneous nuclear ribonucleoproteins C1/C2	HNRNPC	tr|G3V5X6|G3V5X6_HUMAN Heterogeneous nuclear ribonucleoproteins C1/C2 (Fragment) OS=Homo sapiens OX=9606 GN=HNRNPC PE=1 SV=1;tr|G3V3K6|G3V3K6_HUMAN Heterogeneous nuclear ribonucleoproteins C1/C2 (Fragment) OS=Homo sapiens OX=9606 GN=HNRNPC PE=1 SV=1;tr|G3V	15	0	0	1	0	0	0	0	0	1	3	45.596	20999000	0	0	1998900	0	0	0	0	0	1256400	7669700
M0QZ52;Q96HY3;P0DP25;P0DP24;P0DP23;A0A590UK56;E7EMB3		CALM3;CALM2	tr|M0QZ52|M0QZ52_HUMAN Calmodulin OS=Homo sapiens OX=9606 GN=CALM1 PE=1 SV=1;tr|Q96HY3|Q96HY3_HUMAN Calmodulin OS=Homo sapiens OX=9606 GN=CALM2 PE=1 SV=1;sp|P0DP25|CALM3_HUMAN Calmodulin-3 OS=Homo sapiens OX=9606 GN=CALM3 PE=1 SV=1;sp|P0DP24|CALM2_HUMAN Ca	7	0	0	0	0	0	0	0	0	0	0	44.492	17380000	0	0	0	0	0	0	0	0	0	0
O75643;A0A494C1A5	U5 small nuclear ribonucleoprotein 200 kDa helicase	SNRNP200	sp|O75643|U520_HUMAN U5 small nuclear ribonucleoprotein 200 kDa helicase OS=Homo sapiens OX=9606 GN=SNRNP200 PE=1 SV=2;tr|A0A494C1A5|A0A494C1A5_HUMAN U5 small nuclear ribonucleoprotein 200 kDa helicase (Fragment) OS=Homo sapiens OX=9606 GN=SNRNP200 PE=1 SV	2	0	1	2	3	0	3	0	0	2	0	44.443	34209000	0	4294900	8466700	6618600	0	7371900	0	0	3853200	0
J3KPU7;I3L2F2;I3L4T8;I3L1Y4;I3L3U9;J3QSV6;O76021	Ribosomal L1 domain-containing protein 1	RSL1D1	tr|J3KPU7|J3KPU7_HUMAN Ribosomal L1 domain-containing protein 1 OS=Homo sapiens OX=9606 GN=RSL1D1 PE=1 SV=1;tr|I3L2F2|I3L2F2_HUMAN Ribosomal L1 domain-containing protein 1 OS=Homo sapiens OX=9606 GN=RSL1D1 PE=1 SV=1;tr|I3L4T8|I3L4T8_HUMAN Ribosomal L1 doma	7	0	0	0	0	0	0	0	0	0	0	44.271	1521100	0	0	0	0	0	0	0	0	0	0
O60832;H7C2Q9;H7C2Q2;H7C0M1;C9IYT0	H/ACA ribonucleoprotein complex subunit 4	DKC1	sp|O60832|DKC1_HUMAN H/ACA ribonucleoprotein complex subunit DKC1 OS=Homo sapiens OX=9606 GN=DKC1 PE=1 SV=3;tr|H7C2Q9|H7C2Q9_HUMAN H/ACA ribonucleoprotein complex subunit DKC1 (Fragment) OS=Homo sapiens OX=9606 GN=DKC1 PE=1 SV=1;tr|H7C2Q2|H7C2Q2_HUMAN H/AC	5	0	1	0	0	0	0	0	0	2	0	44.128	13829000	0	1377800	0	0	0	0	0	0	7304200	0
O60231;A0A140T947;Q5SQH5	Putative pre-mRNA-splicing factor ATP-dependent RNA helicase DHX16	DHX16	sp|O60231|DHX16_HUMAN Pre-mRNA-splicing factor ATP-dependent RNA helicase DHX16 OS=Homo sapiens OX=9606 GN=DHX16 PE=1 SV=2;tr|A0A140T947|A0A140T947_HUMAN Pre-mRNA-splicing factor ATP-dependent RNA helicase DHX16 (Fragment) OS=Homo sapiens OX=9606 GN=DHX16	5	1	2	2	0	2	2	1	0	2	1	43.038	30511000	2883500	4216000	6166200	0	6277200	7408000	1502000	0	0	2057800
O15371;B0QYA8;B0QYA6;B0QYA5	Eukaryotic translation initiation factor 3 subunit D	EIF3D	sp|O15371|EIF3D_HUMAN Eukaryotic translation initiation factor 3 subunit D OS=Homo sapiens OX=9606 GN=EIF3D PE=1 SV=1;tr|B0QYA8|B0QYA8_HUMAN Eukaryotic translation initiation factor 3 subunit D (Fragment) OS=Homo sapiens OX=9606 GN=EIF3D PE=1 SV=1;tr|B0QYA	4	1	1	0	0	0	0	0	0	0	0	42.681	5807700	1715100	2307200	0	0	0	0	0	0	0	0
P23246	Splicing factor, proline- and glutamine-rich	SFPQ	sp|P23246|SFPQ_HUMAN Splicing factor, proline- and glutamine-rich OS=Homo sapiens OX=9606 GN=SFPQ PE=1 SV=2	2	1	1	2	2	2	0	2	0	1	0	42.097	75849000	3684700	3767800	14697000	12084000	14829000	0	10333000	0	4959000	0
P04745;Q5T085;P19961	Alpha-amylase 1;Alpha-amylase;Alpha-amylase 2B	AMY1A;AMY1B;AMY2B	sp|P04745|AMY1_HUMAN Alpha-amylase 1 OS=Homo sapiens OX=9606 GN=AMY1A PE=1 SV=2;tr|Q5T085|Q5T085_HUMAN Alpha-amylase 1 (Fragment) OS=Homo sapiens OX=9606 GN=AMY1A PE=1 SV=1;sp|P19961|AMY2B_HUMAN Alpha-amylase 2B OS=Homo sapiens OX=9606 GN=AMY2B PE=1 SV=1	5	0	0	1	1	0	0	0	0	0	3	41.795	52921000	0	0	3189900	2644900	0	0	0	0	0	35656000
H7BZ72;Q9Y2X3	Nucleolar protein 58	NOP58	tr|H7BZ72|H7BZ72_HUMAN Nucleolar protein 58 (Fragment) OS=Homo sapiens OX=9606 GN=NOP58 PE=1 SV=1;sp|Q9Y2X3|NOP58_HUMAN Nucleolar protein 58 OS=Homo sapiens OX=9606 GN=NOP58 PE=1 SV=1	2	1	0	2	0	2	2	0	0	0	0	41.151	45302000	1492700	0	5956300	0	18252000	19601000	0	0	0	0
A0A3B3IS95;A0A5F9ZHM4;P07195;F5H793;C9J7H8;A8MW50	L-lactate dehydrogenase B chain;L-lactate dehydrogenase	LDHB	tr|A0A3B3IS95|A0A3B3IS95_HUMAN L-lactate dehydrogenase OS=Homo sapiens OX=9606 PE=3 SV=1;tr|A0A5F9ZHM4|A0A5F9ZHM4_HUMAN L-lactate dehydrogenase OS=Homo sapiens OX=9606 GN=LDHB PE=1 SV=1;sp|P07195|LDHB_HUMAN L-lactate dehydrogenase B chain OS=Homo sapiens O	6	0	0	1	0	0	0	0	0	0	0	40.557	7033700	0	0	1048500	0	0	0	0	0	0	0
F5H018;B5MDF5;J3KQE5;P62826;H0YFC6;B4DV51	GTP-binding nuclear protein Ran	RAN	tr|F5H018|F5H018_HUMAN GTP-binding nuclear protein Ran (Fragment) OS=Homo sapiens OX=9606 GN=RAN PE=1 SV=8;tr|B5MDF5|B5MDF5_HUMAN GTP-binding nuclear protein Ran OS=Homo sapiens OX=9606 GN=RAN PE=1 SV=1;tr|J3KQE5|J3KQE5_HUMAN GTP-binding nuclear protein Ra	6	1	1	1	1	1	1	1	1	1	0	39.788	414430000	47954000	42008000	36199000	47024000	40745000	5199500	23877000	24881000	46753000	0
B7Z4L4;P04843	Dolichyl-diphosphooligosaccharide--protein glycosyltransferase subunit 1	RPN1	tr|B7Z4L4|B7Z4L4_HUMAN Dolichyl-diphosphooligosaccharide--protein glycosyltransferase subunit 1 OS=Homo sapiens OX=9606 GN=RPN1 PE=1 SV=1;sp|P04843|RPN1_HUMAN Dolichyl-diphosphooligosaccharide--protein glycosyltransferase subunit 1 OS=Homo sapiens OX=9606	2	0	1	0	0	0	0	0	0	0	1	39.779	7236300	0	680850	0	0	0	0	0	0	0	1733000
A0A0U1RQR6;H7C106;F8W914;Q9NQC3	Reticulon;Reticulon-4	RTN4	tr|A0A0U1RQR6|A0A0U1RQR6_HUMAN Reticulon (Fragment) OS=Homo sapiens OX=9606 GN=RTN4 PE=1 SV=1;tr|H7C106|H7C106_HUMAN Reticulon (Fragment) OS=Homo sapiens OX=9606 GN=RTN4 PE=1 SV=1;tr|F8W914|F8W914_HUMAN Reticulon OS=Homo sapiens OX=9606 GN=RTN4 PE=1 SV=1;s	4	0	0	0	0	0	0	0	0	0	0	39.463	6061200	0	0	0	0	0	0	0	0	0	0
J3KPX7;Q99623;F5H2D2;F5H0C5;F5H3X6;F5GY37	Prohibitin-2	PHB2	tr|J3KPX7|J3KPX7_HUMAN Prohibitin OS=Homo sapiens OX=9606 GN=PHB2 PE=1 SV=2;sp|Q99623|PHB2_HUMAN Prohibitin-2 OS=Homo sapiens OX=9606 GN=PHB2 PE=1 SV=2;tr|F5H2D2|F5H2D2_HUMAN Prohibitin OS=Homo sapiens OX=9606 GN=PHB2 PE=1 SV=1;tr|F5H0C5|F5H0C5_HUMAN Prohi	6	1	1	1	1	0	0	0	0	0	0	39.191	24374000	5571700	5791500	4528600	2294500	0	0	0	0	0	0
H0YEN5;P15880;I3L404;E9PM36;E9PQD7	40S ribosomal protein S2	RPS2	tr|H0YEN5|H0YEN5_HUMAN 40S ribosomal protein S2 (Fragment) OS=Homo sapiens OX=9606 GN=RPS2 PE=1 SV=1;sp|P15880|RS2_HUMAN 40S ribosomal protein S2 OS=Homo sapiens OX=9606 GN=RPS2 PE=1 SV=2;tr|I3L404|I3L404_HUMAN 40S ribosomal protein S2 (Fragment) OS=Homo s	7	2	2	1	0	1	1	1	1	1	1	39.144	60250000	6456600	2328900	3877500	0	5290300	2321000	2111400	0	2467800	8546000
Q9H0A0;A0A087WV29	N-acetyltransferase 10	NAT10	sp|Q9H0A0|NAT10_HUMAN RNA cytidine acetyltransferase OS=Homo sapiens OX=9606 GN=NAT10 PE=1 SV=2;tr|A0A087WV29|A0A087WV29_HUMAN RNA cytidine acetyltransferase OS=Homo sapiens OX=9606 GN=NAT10 PE=1 SV=1	3	1	1	1	0	4	2	1	1	0	0	39.124	34460000	12102000	0	1043300	0	8998900	5448500	1914200	1811800	0	0
P12814;H9KV75;P35609;G3V2W4;A0A494C1A0;G3V2N5	Alpha-actinin-1;Alpha-actinin-2	ACTN1;ACTN2	sp|P12814|ACTN1_HUMAN Alpha-actinin-1 OS=Homo sapiens OX=9606 GN=ACTN1 PE=1 SV=2;tr|H9KV75|H9KV75_HUMAN Alpha-actinin-1 OS=Homo sapiens OX=9606 GN=ACTN1 PE=1 SV=1;sp|P35609|ACTN2_HUMAN Alpha-actinin-2 OS=Homo sapiens OX=9606 GN=ACTN2 PE=1 SV=1;tr|G3V2W4|G3	17	0	2	0	0	0	0	1	1	3	0	38.773	29044000	0	2945400	0	0	0	0	2289000	2257800	20143000	0
Q32Q12;E7ERL0;J3KPD9;P22392;P15531	Nucleoside diphosphate kinase;Nucleoside diphosphate kinase B;Nucleoside diphosphate kinase A	NME1-NME2;NME1;NME2	tr|Q32Q12|Q32Q12_HUMAN Nucleoside diphosphate kinase OS=Homo sapiens OX=9606 GN=NME1-NME2 PE=1 SV=1;tr|E7ERL0|E7ERL0_HUMAN Nucleoside diphosphate kinase A OS=Homo sapiens OX=9606 GN=NME1 PE=1 SV=1;tr|J3KPD9|J3KPD9_HUMAN NME1-NME2 readthrough OS=Homo sapien	5	1	1	2	1	1	1	0	1	1	0	38.378	90219000	4052800	4971600	18610000	8115600	7861800	4159200	0	5340300	4806700	0
C9JPH9;C9JFC0;A0A0A0MSB2;Q16658	Fascin	FSCN1	tr|C9JPH9|C9JPH9_HUMAN Fascin (Fragment) OS=Homo sapiens OX=9606 GN=FSCN1 PE=1 SV=1;tr|C9JFC0|C9JFC0_HUMAN Fascin (Fragment) OS=Homo sapiens OX=9606 GN=FSCN1 PE=1 SV=1;tr|A0A0A0MSB2|A0A0A0MSB2_HUMAN Fascin (Fragment) OS=Homo sapiens OX=9606 GN=FSCN1 PE=1 S	4	0	0	0	0	0	0	0	0	0	1	37.443	2385100	0	0	0	0	0	0	0	0	0	769100
F8VZJ2;F8W0W4;H0YHX9;Q13765;E9PAV3;F8W1N5;F8VZ58;F8VNW4;Q9BZK3	Nascent polypeptide-associated complex subunit alpha;Nascent polypeptide-associated complex subunit alpha, muscle-specific form;Putative nascent polypeptide-associated complex subunit alpha-like protein	NACA;NACAP1	tr|F8VZJ2|F8VZJ2_HUMAN Nascent polypeptide-associated complex subunit alpha OS=Homo sapiens OX=9606 GN=NACA PE=1 SV=1;tr|F8W0W4|F8W0W4_HUMAN Nascent polypeptide-associated complex subunit alpha (Fragment) OS=Homo sapiens OX=9606 GN=NACA PE=1 SV=1;tr|H0YHX9	9	0	0	1	0	0	0	1	0	0	0	37.07	8114800	0	0	2643100	0	0	0	4183400	0	0	0
Q13263	Transcription intermediary factor 1-beta	TRIM28	sp|Q13263|TIF1B_HUMAN Transcription intermediary factor 1-beta OS=Homo sapiens OX=9606 GN=TRIM28 PE=1 SV=5	4	0	0	0	0	1	0	0	0	0	1	36.658	4566600	0	0	0	0	1591400	0	0	0	0	2025600
A6NLN1;A0A0U1RRM4;P26599;K7ELW5;K7ES59;K7EKJ7;K7EK45	Polypyrimidine tract-binding protein 1	PTBP1	tr|A6NLN1|A6NLN1_HUMAN Polypyrimidine tract binding protein 1, isoform CRA_b OS=Homo sapiens OX=9606 GN=PTBP1 PE=1 SV=4;tr|A0A0U1RRM4|A0A0U1RRM4_HUMAN Polypyrimidine tract-binding protein 1 OS=Homo sapiens OX=9606 GN=PTBP1 PE=1 SV=1;sp|P26599|PTBP1_HUMAN P	7	1	2	2	2	2	1	1	1	2	2	35.537	121130000	3749800	11440000	13868000	11304000	13676000	6751000	8551600	5386200	10004000	5504400
P46783;Q9NQ39	40S ribosomal protein S10;Putative 40S ribosomal protein S10-like	RPS10;RPS10P5	sp|P46783|RS10_HUMAN 40S ribosomal protein S10 OS=Homo sapiens OX=9606 GN=RPS10 PE=1 SV=1;sp|Q9NQ39|RS10L_HUMAN Putative 40S ribosomal protein S10-like OS=Homo sapiens OX=9606 GN=RPS10P5 PE=5 SV=1	2	0	0	0	0	0	0	0	0	0	1	35.362	3061600	0	0	0	0	0	0	0	0	0	1007100
P63104;H0YB80;B0AZS6;B7Z2E6	14-3-3 protein zeta/delta	YWHAZ	sp|P63104|1433Z_HUMAN 14-3-3 protein zeta/delta OS=Homo sapiens OX=9606 GN=YWHAZ PE=1 SV=1;tr|H0YB80|H0YB80_HUMAN 14-3-3 protein zeta/delta (Fragment) OS=Homo sapiens OX=9606 GN=YWHAZ PE=1 SV=1;tr|B0AZS6|B0AZS6_HUMAN 14-3-3 protein zeta/delta OS=Homo sapie	21	0	1	0	0	0	0	0	0	0	0	35.242	13368000	0	808440	0	0	0	0	0	0	0	0
P51532;A0A2R8Y526;Q9HBD4;A0A2R8Y4P4;A0A2R8Y7S2;A0A2R8YGG3;A0A2R8YG32;A0A2R8Y440;A0A2R8Y7F3;A0A2R8Y6N0;A0A2R8YF80;A0A2R8Y7Y7;A0A2R8YF58;A0A2R8Y6V2;A0A2R8Y523;A0A2R8Y5K3;K7EQF0;A0A2R8YFK5;A0A0A0MT49;A0A2R8Y4C5;A0A2R8YDA1;A0A0U1RRG6;A0A0U1RQZ9;F6VDE0;P51531	Transcription activator BRG1;Probable global transcription activator SNF2L2	SMARCA4;SMARCA2	sp|P51532|SMCA4_HUMAN Transcription activator BRG1 OS=Homo sapiens OX=9606 GN=SMARCA4 PE=1 SV=2;tr|A0A2R8Y526|A0A2R8Y526_HUMAN Transcription activator BRG1 (Fragment) OS=Homo sapiens OX=9606 GN=SMARCA4 PE=1 SV=1;tr|Q9HBD4|Q9HBD4_HUMAN SMARCA4 isoform 2 OS=	26	1	1	4	2	2	2	0	2	1	1	35.026	59663000	1530500	2165900	8679600	12299000	7839200	12400000	0	1737100	4825900	2401000
P13639	Elongation factor 2	EEF2	sp|P13639|EF2_HUMAN Elongation factor 2 OS=Homo sapiens OX=9606 GN=EEF2 PE=1 SV=4	1	1	1	1	1	1	1	1	1	1	1	34.488	116550000	9398500	10324000	15588000	4660900	10026000	4919300	9803800	4144500	7420100	17829000
P53396	ATP-citrate synthase	ACLY	sp|P53396|ACLY_HUMAN ATP-citrate synthase OS=Homo sapiens OX=9606 GN=ACLY PE=1 SV=3	1	3	3	1	1	1	0	2	0	0	0	34.301	33161000	12229000	7435900	1997900	4487400	2102600	0	3543200	0	0	0
P11387	DNA topoisomerase 1	TOP1	sp|P11387|TOP1_HUMAN DNA topoisomerase 1 OS=Homo sapiens OX=9606 GN=TOP1 PE=1 SV=2	1	1	1	1	0	1	1	1	0	0	0	33.904	41779000	2747200	9660800	2435000	0	4046000	3605000	2179800	0	0	0
CON__Q7RTT2;CON__Q8N1N4-2;Q8N1N4	Keratin, type II cytoskeletal 78	KRT78	;;sp|Q8N1N4|K2C78_HUMAN Keratin, type II cytoskeletal 78 OS=Homo sapiens OX=9606 GN=KRT78 PE=1 SV=2	3	1	1	1	1	1	1	1	1	1	1	33.87	142320000	2333200	2379200	13066000	9050800	10136000	8688300	18950000	13849000	11803000	14367000
P30041	Peroxiredoxin-6	PRDX6	sp|P30041|PRDX6_HUMAN Peroxiredoxin-6 OS=Homo sapiens OX=9606 GN=PRDX6 PE=1 SV=3	1	2	0	2	2	1	3	0	1	1	0	33.49	62723000	5960800	0	12871000	6222700	4318500	8131100	0	8040100	2897600	0
A0A3B3IRL2;O75629	Protein CREG1	CREG1	tr|A0A3B3IRL2|A0A3B3IRL2_HUMAN Cellular repressor of E1A-stimulated genes 1, isoform CRA_a OS=Homo sapiens OX=9606 GN=CREG1 PE=1 SV=1;sp|O75629|CREG1_HUMAN Protein CREG1 OS=Homo sapiens OX=9606 GN=CREG1 PE=1 SV=1	2	0	1	1	1	1	1	1	1	1	1	33.37	98666000	0	3474900	14241000	16171000	12346000	7948000	8268900	6361300	6566600	3558700
Q99714;Q5H928	3-hydroxyacyl-CoA dehydrogenase type-2	HSD17B10	sp|Q99714|HCD2_HUMAN 3-hydroxyacyl-CoA dehydrogenase type-2 OS=Homo sapiens OX=9606 GN=HSD17B10 PE=1 SV=3;tr|Q5H928|Q5H928_HUMAN 3-hydroxyacyl-CoA dehydrogenase type-2 OS=Homo sapiens OX=9606 GN=HSD17B10 PE=1 SV=1	2	2	2	2	1	1	1	1	0	1	2	33.087	61700000	6304600	4679100	8208400	2809800	3490000	2454500	2740400	0	2532600	6493500
Q07021;I3L3Q7;I3L3B0	Complement component 1 Q subcomponent-binding protein, mitochondrial	C1QBP	sp|Q07021|C1QBP_HUMAN Complement component 1 Q subcomponent-binding protein, mitochondrial OS=Homo sapiens OX=9606 GN=C1QBP PE=1 SV=1;tr|I3L3Q7|I3L3Q7_HUMAN Complement component 1 Q subcomponent-binding protein, mitochondrial (Fragment) OS=Homo sapiens OX=	3	1	1	0	1	1	0	0	0	0	1	32.079	9594100	2962500	1903500	0	0	1737700	0	0	0	0	2074300
F8W7C6;A0A087WV22;X1WI28;P27635	60S ribosomal protein L10	RPL10	tr|F8W7C6|F8W7C6_HUMAN 60S ribosomal protein L10 OS=Homo sapiens OX=9606 GN=RPL10 PE=1 SV=2;tr|A0A087WV22|A0A087WV22_HUMAN 60S ribosomal protein L10 OS=Homo sapiens OX=9606 GN=RPL10 PE=1 SV=1;tr|X1WI28|X1WI28_HUMAN 60S ribosomal protein L10 (Fragment) OS=H	4	2	1	1	1	2	1	0	0	1	2	31.957	65299000	4775100	6111700	3799800	2177600	18616000	8236900	0	0	4008500	7425300
P19338;H7BY16	Nucleolin	NCL	sp|P19338|NUCL_HUMAN Nucleolin OS=Homo sapiens OX=9606 GN=NCL PE=1 SV=3;tr|H7BY16|H7BY16_HUMAN Nucleolin (Fragment) OS=Homo sapiens OX=9606 GN=NCL PE=1 SV=8	2	1	1	2	1	2	2	1	1	2	1	31.777	60156000	2458200	2760700	9110300	3597700	11062000	7831000	2121200	1867500	6402500	0
CON__P02754				1	1	1	1	1	1	1	1	1	1	1	31.754	183700000	7196800	8592600	16528000	22385000	11607000	18567000	17492000	15171000	13941000	13846000
Q5JXB7;Q02809	Procollagen-lysine,2-oxoglutarate 5-dioxygenase 1	PLOD1	tr|Q5JXB7|Q5JXB7_HUMAN Procollagen-lysine,2-oxoglutarate 5-dioxygenase 1 (Fragment) OS=Homo sapiens OX=9606 GN=PLOD1 PE=1 SV=1;sp|Q02809|PLOD1_HUMAN Procollagen-lysine,2-oxoglutarate 5-dioxygenase 1 OS=Homo sapiens OX=9606 GN=PLOD1 PE=1 SV=2	2	0	0	0	0	0	0	0	0	0	0	31.64	1129400	0	0	0	0	0	0	0	0	0	0
E7EQB2;E7ER44;P02788	Lactotransferrin;Lactoferricin-H;Kaliocin-1;Lactoferroxin-A;Lactoferroxin-B;Lactoferroxin-C	LTF	tr|E7EQB2|E7EQB2_HUMAN Lactotransferrin (Fragment) OS=Homo sapiens OX=9606 GN=LTF PE=1 SV=1;tr|E7ER44|E7ER44_HUMAN Lactotransferrin OS=Homo sapiens OX=9606 GN=LTF PE=1 SV=1;sp|P02788|TRFL_HUMAN Lactotransferrin OS=Homo sapiens OX=9606 GN=LTF PE=1 SV=6	3	0	0	0	0	0	0	0	0	0	1	31.426	4571300	0	0	0	0	0	0	0	0	0	4571300
A0A087WTR3;A0A087WZS4;A0A087WVU1;A0A0D9SF98;A0A087WWJ5;A0A0D9SF30;H7BYX6;A0A087WTE4;A0A087WTF6;A0A087WX77;A0A087WWD4;A0A087WV75;P13591	Neural cell adhesion molecule 1	NCAM1	tr|A0A087WTR3|A0A087WTR3_HUMAN Neural cell adhesion molecule 1 (Fragment) OS=Homo sapiens OX=9606 GN=NCAM1 PE=1 SV=1;tr|A0A087WZS4|A0A087WZS4_HUMAN Neural cell adhesion molecule 1 (Fragment) OS=Homo sapiens OX=9606 GN=NCAM1 PE=1 SV=6;tr|A0A087WVU1|A0A087WV	13	0	0	0	0	0	0	0	0	0	0	31.424	9015100	0	0	0	0	0	0	0	0	0	0
P27694	Replication protein A 70 kDa DNA-binding subunit;Replication protein A 70 kDa DNA-binding subunit, N-terminally processed	RPA1	sp|P27694|RFA1_HUMAN Replication protein A 70 kDa DNA-binding subunit OS=Homo sapiens OX=9606 GN=RPA1 PE=1 SV=2	1	0	1	1	1	1	0	1	1	0	1	30.24	14210000	0	1699200	0	3197700	0	0	0	1624500	0	4069100
P31327;Q5R211	Carbamoyl-phosphate synthase [ammonia], mitochondrial	CPS1	sp|P31327|CPSM_HUMAN Carbamoyl-phosphate synthase [ammonia], mitochondrial OS=Homo sapiens OX=9606 GN=CPS1 PE=1 SV=2;tr|Q5R211|Q5R211_HUMAN Carbamoyl-phosphate synthase [ammonia], mitochondrial OS=Homo sapiens OX=9606 GN=CPS1 PE=1 SV=1	3	0	0	0	0	0	0	0	0	0	0	30.204	3150800	0	0	0	0	0	0	0	0	0	0
O60506;F6UXX1;B7Z645	Heterogeneous nuclear ribonucleoprotein Q	SYNCRIP	sp|O60506|HNRPQ_HUMAN Heterogeneous nuclear ribonucleoprotein Q OS=Homo sapiens OX=9606 GN=SYNCRIP PE=1 SV=2;tr|F6UXX1|F6UXX1_HUMAN Heterogeneous nuclear ribonucleoprotein Q (Fragment) OS=Homo sapiens OX=9606 GN=SYNCRIP PE=1 SV=1;tr|B7Z645|B7Z645_HUMAN Het	3	1	0	1	0	0	1	0	0	0	1	30.11	6175000	1059500	0	0	0	0	0	0	0	0	1721000
P0DPH8;P0DPH7;Q6PEY2	Tubulin alpha-3E chain	TUBA3E	sp|P0DPH8|TBA3D_HUMAN Tubulin alpha-3D chain OS=Homo sapiens OX=9606 GN=TUBA3D PE=1 SV=1;sp|P0DPH7|TBA3C_HUMAN Tubulin alpha-3C chain OS=Homo sapiens OX=9606 GN=TUBA3C PE=1 SV=1;sp|Q6PEY2|TBA3E_HUMAN Tubulin alpha-3E chain OS=Homo sapiens OX=9606 GN=TUBA3E	5	1	0	0	0	0	0	0	0	0	0	29.982	13142000	13142000	0	0	0	0	0	0	0	0	0
O00571;A0A0D9SFB3;A0A2R8Y645;A0A2R8Y4A4;A0A2U3TZJ9;A0A2R8YFS5;A0A2R8YFR4;A0A0D9SG12;A0A2R8YCW1;A0A2R8YF78;A0A2R8Y5G6;A0A2R8Y7T2;A0A2R8YDT5;A0A0D9SF53;O15523;F6S8Q4;A0A2R8YDH3	ATP-dependent RNA helicase DDX3X;ATP-dependent RNA helicase DDX3Y	DDX3X;DDX3Y	sp|O00571|DDX3X_HUMAN ATP-dependent RNA helicase DDX3X OS=Homo sapiens OX=9606 GN=DDX3X PE=1 SV=3;tr|A0A0D9SFB3|A0A0D9SFB3_HUMAN ATP-dependent RNA helicase DDX3X OS=Homo sapiens OX=9606 GN=DDX3X PE=1 SV=1;tr|A0A2R8Y645|A0A2R8Y645_HUMAN ATP-dependent RNA he	19	1	1	2	1	2	1	0	0	0	0	29.885	34708000	4104700	3677000	7867400	10630000	4133900	0	0	0	0	0
P52907;P47755	F-actin-capping protein subunit alpha-1;F-actin-capping protein subunit alpha-2	CAPZA1;CAPZA2	sp|P52907|CAZA1_HUMAN F-actin-capping protein subunit alpha-1 OS=Homo sapiens OX=9606 GN=CAPZA1 PE=1 SV=3;sp|P47755|CAZA2_HUMAN F-actin-capping protein subunit alpha-2 OS=Homo sapiens OX=9606 GN=CAPZA2 PE=1 SV=3	2	0	0	0	0	0	0	0	0	0	0	29.333	4489500	0	0	0	0	0	0	0	0	0	0
B0YJC4;P08670;A0A1B0GTT5	Vimentin	VIM	tr|B0YJC4|B0YJC4_HUMAN Vimentin OS=Homo sapiens OX=9606 GN=VIM PE=1 SV=1;sp|P08670|VIME_HUMAN Vimentin OS=Homo sapiens OX=9606 GN=VIM PE=1 SV=4;tr|A0A1B0GTT5|A0A1B0GTT5_HUMAN Vimentin (Fragment) OS=Homo sapiens OX=9606 GN=VIM PE=1 SV=1	5	1	0	1	1	0	1	0	1	1	2	29.1	76346000	3151000	0	9600700	4911200	0	2034300	0	3331300	21553000	10895000
P12956;B1AHC9	X-ray repair cross-complementing protein 6	XRCC6	sp|P12956|XRCC6_HUMAN X-ray repair cross-complementing protein 6 OS=Homo sapiens OX=9606 GN=XRCC6 PE=1 SV=2;tr|B1AHC9|B1AHC9_HUMAN X-ray repair cross-complementing protein 6 OS=Homo sapiens OX=9606 GN=XRCC6 PE=1 SV=1	2	1	1	0	1	0	0	0	1	1	1	28.742	37645000	3882100	7973900	0	7652800	0	0	0	3376000	6097100	910080
A0A0D9SF54;A0A0D9SGF6;Q13813;A0A5F9ZHC3;A0A0D9SFF6	Spectrin alpha chain, non-erythrocytic 1	SPTAN1	tr|A0A0D9SF54|A0A0D9SF54_HUMAN Spectrin alpha chain, non-erythrocytic 1 OS=Homo sapiens OX=9606 GN=SPTAN1 PE=1 SV=1;tr|A0A0D9SGF6|A0A0D9SGF6_HUMAN Spectrin alpha chain, non-erythrocytic 1 OS=Homo sapiens OX=9606 GN=SPTAN1 PE=1 SV=1;sp|Q13813|SPTN1_HUMAN Sp	5	0	0	0	0	0	0	0	0	1	0	28.472	3781600	0	0	0	0	0	0	0	0	1871000	0
A0A087WUZ3;Q01082	Spectrin beta chain, non-erythrocytic 1	SPTBN1	tr|A0A087WUZ3|A0A087WUZ3_HUMAN Spectrin beta chain OS=Homo sapiens OX=9606 GN=SPTBN1 PE=1 SV=1;sp|Q01082|SPTB2_HUMAN Spectrin beta chain, non-erythrocytic 1 OS=Homo sapiens OX=9606 GN=SPTBN1 PE=1 SV=2	2	0	0	0	0	1	0	0	1	3	0	28.254	78475000	0	0	0	0	49030000	0	0	2230500	25651000	0
A0A494C128;O00567;H0Y653;H0YDU4	Nucleolar protein 56	NOP56	tr|A0A494C128|A0A494C128_HUMAN Nucleolar protein 56 OS=Homo sapiens OX=9606 GN=NOP56 PE=1 SV=1;sp|O00567|NOP56_HUMAN Nucleolar protein 56 OS=Homo sapiens OX=9606 GN=NOP56 PE=1 SV=4;tr|H0Y653|H0Y653_HUMAN Nucleolar protein 56 (Fragment) OS=Homo sapiens OX=9	5	2	0	2	1	4	2	1	1	2	0	27.543	94074000	6168800	0	13087000	3972200	20255000	20692000	3328900	3873200	12105000	0
Q08211	ATP-dependent RNA helicase A	DHX9	sp|Q08211|DHX9_HUMAN ATP-dependent RNA helicase A OS=Homo sapiens OX=9606 GN=DHX9 PE=1 SV=4	1	0	1	1	1	0	1	0	0	0	0	27.219	13899000	0	2055400	0	3004900	0	4041900	0	0	0	0
A0A0J9YXZ5;P46940;H0YLE8	Ras GTPase-activating-like protein IQGAP1	IQGAP1	tr|A0A0J9YXZ5|A0A0J9YXZ5_HUMAN Ras GTPase-activating-like protein IQGAP1 OS=Homo sapiens OX=9606 GN=IQGAP1 PE=1 SV=1;sp|P46940|IQGA1_HUMAN Ras GTPase-activating-like protein IQGAP1 OS=Homo sapiens OX=9606 GN=IQGAP1 PE=1 SV=1;tr|H0YLE8|H0YLE8_HUMAN Ras GTPa	4	1	0	1	0	1	1	1	1	2	0	27.148	48448000	5519000	0	0	0	3638900	3118700	2530200	2623500	25367000	0
P35580	Myosin-10	MYH10	sp|P35580|MYH10_HUMAN Myosin-10 OS=Homo sapiens OX=9606 GN=MYH10 PE=1 SV=3	2	0	0	0	0	0	1	0	0	3	0	26.823	17475000	0	0	0	0	0	1444500	0	0	16030000	0
H3BNT7;H3BTM8;P51665;H3BQV2	26S proteasome non-ATPase regulatory subunit 7	PSMD7	tr|H3BNT7|H3BNT7_HUMAN 26S proteasome non-ATPase regulatory subunit 7 OS=Homo sapiens OX=9606 GN=PSMD7 PE=1 SV=1;tr|H3BTM8|H3BTM8_HUMAN 26S proteasome non-ATPase regulatory subunit 7 OS=Homo sapiens OX=9606 GN=PSMD7 PE=1 SV=1;sp|P51665|PSMD7_HUMAN 26S prot	4	2	0	0	0	0	1	0	0	0	0	26.788	9350700	4733700	0	0	0	0	0	0	0	0	0
P05455	Lupus La protein	SSB	sp|P05455|LA_HUMAN Lupus La protein OS=Homo sapiens OX=9606 GN=SSB PE=1 SV=2	3	0	0	0	2	0	1	0	0	0	0	26.634	8114700	0	0	0	2072100	0	4266500	0	0	0	0
Q14498;G3V546;A0A0U1RQW2;G3V5Z6;H0YJJ3;A0A0U1RQH7;G3XAP0;H0Y4X3;G3XAC6;Q86U06	RNA-binding protein 39;Probable RNA-binding protein 23	RBM39;RBM23	sp|Q14498|RBM39_HUMAN RNA-binding protein 39 OS=Homo sapiens OX=9606 GN=RBM39 PE=1 SV=2;tr|G3V546|G3V546_HUMAN Probable RNA-binding protein 23 (Fragment) OS=Homo sapiens OX=9606 GN=RBM23 PE=1 SV=8;tr|A0A0U1RQW2|A0A0U1RQW2_HUMAN RNA-binding protein 39 (Frag	10	1	1	1	1	2	1	1	0	0	1	26.57	119780000	6308400	10206000	6957700	12525000	34417000	5409200	11475000	0	0	5958900
J3KT29;P62829;C9JD32;B9ZVP7	60S ribosomal protein L23	RPL23	tr|J3KT29|J3KT29_HUMAN 60S ribosomal protein L23 OS=Homo sapiens OX=9606 GN=RPL23 PE=1 SV=1;sp|P62829|RL23_HUMAN 60S ribosomal protein L23 OS=Homo sapiens OX=9606 GN=RPL23 PE=1 SV=1;tr|C9JD32|C9JD32_HUMAN 60S ribosomal protein L23 (Fragment) OS=Homo sapien	5	2	2	1	0	1	2	0	0	2	1	26.378	47679000	5463700	3058300	2945100	0	7989500	4236900	0	0	2236100	3304700
P60174;U3KQF3;U3KPZ0	Triosephosphate isomerase	TPI1	sp|P60174|TPIS_HUMAN Triosephosphate isomerase OS=Homo sapiens OX=9606 GN=TPI1 PE=1 SV=3;tr|U3KQF3|U3KQF3_HUMAN Triosephosphate isomerase (Fragment) OS=Homo sapiens OX=9606 GN=TPI1 PE=1 SV=1;tr|U3KPZ0|U3KPZ0_HUMAN Triosephosphate isomerase (Fragment) OS=Ho	3	0	0	1	0	1	0	0	0	0	1	25.906	16168000	0	0	3061100	0	2128600	0	0	0	0	2145000
P34897;G3V4W5;G3V540;G3V5L0;G3V2Y4;H0YIZ0	Serine hydroxymethyltransferase, mitochondrial;Serine hydroxymethyltransferase	SHMT2	sp|P34897|GLYM_HUMAN Serine hydroxymethyltransferase, mitochondrial OS=Homo sapiens OX=9606 GN=SHMT2 PE=1 SV=3;tr|G3V4W5|G3V4W5_HUMAN Serine hydroxymethyltransferase, mitochondrial (Fragment) OS=Homo sapiens OX=9606 GN=SHMT2 PE=1 SV=1;tr|G3V540|G3V540_HUMA	9	1	2	4	2	0	1	2	0	2	0	25.653	56410000	3827100	4827000	12270000	6218300	0	2210200	5745000	0	6931300	0
Q8N1F7;H3BV15;H3BMX0;H3BP95;H3BM93;H3BVG0	Nuclear pore complex protein Nup93	NUP93	sp|Q8N1F7|NUP93_HUMAN Nuclear pore complex protein Nup93 OS=Homo sapiens OX=9606 GN=NUP93 PE=1 SV=2;tr|H3BV15|H3BV15_HUMAN Nuclear pore complex protein Nup93 (Fragment) OS=Homo sapiens OX=9606 GN=NUP93 PE=1 SV=1;tr|H3BMX0|H3BMX0_HUMAN Nuclear pore complex	6	1	0	2	0	0	0	0	0	0	0	25.522	7626400	3866000	0	3760400	0	0	0	0	0	0	0
M0QYU1;P13807	Glycogen [starch] synthase, muscle	GYS1	tr|M0QYU1|M0QYU1_HUMAN Glycogen [starch] synthase (Fragment) OS=Homo sapiens OX=9606 GN=GYS1 PE=1 SV=1;sp|P13807|GYS1_HUMAN Glycogen [starch] synthase, muscle OS=Homo sapiens OX=9606 GN=GYS1 PE=1 SV=2	2	1	0	0	1	1	1	0	1	1	0	25.275	11198000	0	0	0	1194200	2209700	0	0	1624800	2382500	0
P15311;E7EQR4	Ezrin	EZR	sp|P15311|EZRI_HUMAN Ezrin OS=Homo sapiens OX=9606 GN=EZR PE=1 SV=4;tr|E7EQR4|E7EQR4_HUMAN Ezrin OS=Homo sapiens OX=9606 GN=EZR PE=1 SV=3	3	0	1	0	2	1	0	0	0	2	1	24.902	54658000	0	2698400	0	7961200	6903800	0	0	0	13261000	13921000
CON__P02769				1	1	0	0	1	0	1	1	0	2	2	24.77	18763000	1840800	0	0	376880	0	1910000	3763500	0	3660300	5730800
P12882;Q9UKX3;P13535;Q9UKX2	Myosin-1;Myosin-13;Myosin-8;Myosin-2	MYH1;MYH13;MYH8;MYH2	sp|P12882|MYH1_HUMAN Myosin-1 OS=Homo sapiens OX=9606 GN=MYH1 PE=1 SV=3;sp|Q9UKX3|MYH13_HUMAN Myosin-13 OS=Homo sapiens OX=9606 GN=MYH13 PE=2 SV=2;sp|P13535|MYH8_HUMAN Myosin-8 OS=Homo sapiens OX=9606 GN=MYH8 PE=1 SV=3;sp|Q9UKX2|MYH2_HUMAN Myosin-2 OS=Homo	8	0	0	2	2	0	0	0	0	0	0	24.15	31073000	0	0	5232100	25841000	0	0	0	0	0	0
O14617;A0A2R8Y4J3;A0A2R8Y611	AP-3 complex subunit delta-1	AP3D1	sp|O14617|AP3D1_HUMAN AP-3 complex subunit delta-1 OS=Homo sapiens OX=9606 GN=AP3D1 PE=1 SV=1;tr|A0A2R8Y4J3|A0A2R8Y4J3_HUMAN AP-3 complex subunit delta-1 (Fragment) OS=Homo sapiens OX=9606 GN=AP3D1 PE=1 SV=1;tr|A0A2R8Y611|A0A2R8Y611_HUMAN AP-3 complex subu	5	1	1	1	0	2	2	1	0	1	2	23.845	50698000	3687600	5973200	3635700	0	8065700	6028000	1213100	0	2843300	6892000
P62304	Small nuclear ribonucleoprotein E	SNRPE	sp|P62304|RUXE_HUMAN Small nuclear ribonucleoprotein E OS=Homo sapiens OX=9606 GN=SNRPE PE=1 SV=1	1	1	1	1	1	1	0	0	0	1	1	23.466	24168000	3071700	1379400	8286600	2363600	4917200	0	0	0	0	4149500
CON__Q0V8M9				1	0	0	0	0	0	0	0	0	0	0	23.397	3605300	0	0	0	0	0	0	0	0	0	0
P68371;P04350;Q5ST81	Tubulin beta-4B chain;Tubulin beta-4A chain	TUBB4B;TUBB4A;TUBB	sp|P68371|TBB4B_HUMAN Tubulin beta-4B chain OS=Homo sapiens OX=9606 GN=TUBB4B PE=1 SV=1;sp|P04350|TBB4A_HUMAN Tubulin beta-4A chain OS=Homo sapiens OX=9606 GN=TUBB4A PE=1 SV=2;tr|Q5ST81|Q5ST81_HUMAN Tubulin beta chain OS=Homo sapiens OX=9606 GN=TUBB PE=1 S	18	1	1	0	0	0	0	0	0	1	0	23.394	35818000	3183400	7091200	0	0	0	0	0	0	7682500	0
A0A087WXQ8;A0A087WY10;A0A087WUL2;P49720	Proteasome subunit beta type-3	PSMB3	tr|A0A087WXQ8|A0A087WXQ8_HUMAN Proteasome subunit beta type-3 OS=Homo sapiens OX=9606 GN=PSMB3 PE=1 SV=1;tr|A0A087WY10|A0A087WY10_HUMAN Proteasome subunit beta type-3 OS=Homo sapiens OX=9606 GN=PSMB3 PE=1 SV=1;tr|A0A087WUL2|A0A087WUL2_HUMAN Proteasome subu	4	0	0	1	0	1	0	1	0	0	0	23.393	22214000	0	0	3030300	0	4974600	0	5003600	0	0	0
G3V154;F2Z2T0;Q3YEC7;H0Y7H6	Rab-like protein 6	RABL6	tr|G3V154|G3V154_HUMAN Chromosome 9 open reading frame 86, isoform CRA_d OS=Homo sapiens OX=9606 GN=RABL6 PE=1 SV=1;tr|F2Z2T0|F2Z2T0_HUMAN Rab-like protein 6 OS=Homo sapiens OX=9606 GN=RABL6 PE=1 SV=1;sp|Q3YEC7|RABL6_HUMAN Rab-like protein 6 OS=Homo sapien	4	0	2	1	0	1	0	0	0	1	0	23.236	15235000	0	3325100	2224500	0	7669400	0	0	0	2015900	0
P05023	Sodium/potassium-transporting ATPase subunit alpha-1	ATP1A1	sp|P05023|AT1A1_HUMAN Sodium/potassium-transporting ATPase subunit alpha-1 OS=Homo sapiens OX=9606 GN=ATP1A1 PE=1 SV=1	1	0	0	0	0	0	0	0	0	1	0	23.227	4221800	0	0	0	0	0	0	0	0	1194600	0
A0A0D9SEI8;H0Y449;P67809;Q9Y2T7;P16989	Nuclease-sensitive element-binding protein 1;Y-box-binding protein 2;Y-box-binding protein 3	YBX3;YBX1;YBX2	tr|A0A0D9SEI8|A0A0D9SEI8_HUMAN Y-box-binding protein 3 (Fragment) OS=Homo sapiens OX=9606 GN=YBX3 PE=1 SV=1;tr|H0Y449|H0Y449_HUMAN Y-box-binding protein 1 (Fragment) OS=Homo sapiens OX=9606 GN=YBX1 PE=1 SV=1;sp|P67809|YBOX1_HUMAN Y-box-binding protein 1 OS	5	0	0	0	0	0	0	0	0	0	0	22.711	1808900	0	0	0	0	0	0	0	0	0	0
B4DVF8;M0QYL7;M0R1W6;M0QXS5;A0A3B3ITJ4;P14866	Heterogeneous nuclear ribonucleoprotein L	HNRNPL	tr|B4DVF8|B4DVF8_HUMAN Heterogeneous nuclear ribonucleoprotein L OS=Homo sapiens OX=9606 GN=HNRNPL PE=1 SV=1;tr|M0QYL7|M0QYL7_HUMAN Heterogeneous nuclear ribonucleoprotein L (Fragment) OS=Homo sapiens OX=9606 GN=HNRNPL PE=1 SV=1;tr|M0R1W6|M0R1W6_HUMAN Hete	6	0	0	0	0	0	0	0	0	0	0	22.547	1217000	0	0	0	0	0	0	0	0	0	0
A0A494C1T2;V9GZ78;V9GYY3;A0A384N5Y3;F5H2F4;P11586	C-1-tetrahydrofolate synthase, cytoplasmic;Methylenetetrahydrofolate dehydrogenase;Methenyltetrahydrofolate cyclohydrolase;Formyltetrahydrofolate synthetase;C-1-tetrahydrofolate synthase, cytoplasmic, N-terminally processed	MTHFD1	tr|A0A494C1T2|A0A494C1T2_HUMAN C-1-tetrahydrofolate synthase, cytoplasmic (Fragment) OS=Homo sapiens OX=9606 GN=MTHFD1 PE=1 SV=1;tr|V9GZ78|V9GZ78_HUMAN C-1-tetrahydrofolate synthase, cytoplasmic OS=Homo sapiens OX=9606 GN=MTHFD1 PE=1 SV=2;tr|V9GYY3|V9GYY3_	6	0	0	0	0	0	0	0	0	0	2	22.429	13925000	0	0	0	0	0	0	0	0	0	4769700
CON__Q3T052				1	0	0	0	0	0	0	0	0	0	1	22.324	2472200	0	0	0	0	0	0	0	0	0	665510
A6NIW5;P32119	Peroxiredoxin-2	PRDX2	tr|A6NIW5|A6NIW5_HUMAN Peroxiredoxin 2, isoform CRA_a OS=Homo sapiens OX=9606 GN=PRDX2 PE=1 SV=2;sp|P32119|PRDX2_HUMAN Peroxiredoxin-2 OS=Homo sapiens OX=9606 GN=PRDX2 PE=1 SV=5	2	1	1	1	1	1	1	1	1	1	0	22.197	40354000	2370200	1724400	5688900	5127700	3723400	3064800	3699500	1975900	5251300	0
P17987;F5H282;E7EQR6	T-complex protein 1 subunit alpha	TCP1	sp|P17987|TCPA_HUMAN T-complex protein 1 subunit alpha OS=Homo sapiens OX=9606 GN=TCP1 PE=1 SV=1;tr|F5H282|F5H282_HUMAN T-complex protein 1 subunit alpha OS=Homo sapiens OX=9606 GN=TCP1 PE=1 SV=1;tr|E7EQR6|E7EQR6_HUMAN T-complex protein 1 subunit alpha OS=	8	3	1	0	0	0	0	1	0	0	1	22.142	8387600	3707100	0	0	0	0	0	1417900	0	0	1908800
Q12789	General transcription factor 3C polypeptide 1	GTF3C1	sp|Q12789|TF3C1_HUMAN General transcription factor 3C polypeptide 1 OS=Homo sapiens OX=9606 GN=GTF3C1 PE=1 SV=4	1	1	0	0	2	0	1	0	0	1	0	21.969	5689000	703700	0	0	2059200	0	0	0	0	1199400	0
Q92614;A0A0D9SFK2;H0YEV9	Unconventional myosin-XVIIIa	MYO18A	sp|Q92614|MY18A_HUMAN Unconventional myosin-XVIIIa OS=Homo sapiens OX=9606 GN=MYO18A PE=1 SV=3;tr|A0A0D9SFK2|A0A0D9SFK2_HUMAN Unconventional myosin-XVIIIa OS=Homo sapiens OX=9606 GN=MYO18A PE=1 SV=1;tr|H0YEV9|H0YEV9_HUMAN Unconventional myosin-XVIIIa (Frag	3	0	0	0	0	1	0	0	0	2	0	21.592	36267000	0	0	0	0	4797500	0	0	0	31470000	0
J3KSP2;J3KT73;J3QL01;P63173	60S ribosomal protein L38	RPL38	tr|J3KSP2|J3KSP2_HUMAN 60S ribosomal protein L38 (Fragment) OS=Homo sapiens OX=9606 GN=RPL38 PE=1 SV=1;tr|J3KT73|J3KT73_HUMAN 60S ribosomal protein L38 OS=Homo sapiens OX=9606 GN=RPL38 PE=1 SV=1;tr|J3QL01|J3QL01_HUMAN 60S ribosomal protein L38 OS=Homo sapi	4	2	0	0	0	2	1	1	0	0	1	21.427	136070000	8789900	0	0	0	52831000	6544900	7966700	0	0	11460000
P26641	Elongation factor 1-gamma	EEF1G	sp|P26641|EF1G_HUMAN Elongation factor 1-gamma OS=Homo sapiens OX=9606 GN=EEF1G PE=1 SV=3	1	2	3	1	1	0	1	0	0	1	0	21.41	79223000	7085000	34196000	4463100	3542000	0	2425500	0	0	15094000	0
I3L4Q1;K7EMZ9;A0A140TA76;Q8ND56	Protein LSM14 homolog A	LSM14A	tr|I3L4Q1|I3L4Q1_HUMAN Protein LSM14 homolog A OS=Homo sapiens OX=9606 GN=LSM14A PE=1 SV=1;tr|K7EMZ9|K7EMZ9_HUMAN Protein LSM14 homolog A (Fragment) OS=Homo sapiens OX=9606 GN=LSM14A PE=1 SV=2;tr|A0A140TA76|A0A140TA76_HUMAN Protein LSM14 homolog A (Fragmen	4	0	0	0	0	0	0	0	0	0	0	20.979	0	0	0	0	0	0	0	0	0	0	0
Q5SY16	Polynucleotide 5-hydroxyl-kinase NOL9	NOL9	sp|Q5SY16|NOL9_HUMAN Polynucleotide 5-hydroxyl-kinase NOL9 OS=Homo sapiens OX=9606 GN=NOL9 PE=1 SV=1	1	2	1	1	0	2	2	0	0	1	0	20.976	44220000	4496600	2969200	3303400	0	9506300	10942000	0	0	2542300	0
CON__Q7Z794;Q7Z794	Keratin, type II cytoskeletal 1b	KRT77	;sp|Q7Z794|K2C1B_HUMAN Keratin, type II cytoskeletal 1b OS=Homo sapiens OX=9606 GN=KRT77 PE=1 SV=3	2	0	0	0	0	0	0	0	0	0	3	20.973	19361000	0	0	0	0	0	0	0	0	0	17013000
A0A5F9ZH78;A0A5F9ZGN6;P05089	Arginase-1	ARG1	tr|A0A5F9ZH78|A0A5F9ZH78_HUMAN Arginase-1 OS=Homo sapiens OX=9606 GN=ARG1 PE=1 SV=1;tr|A0A5F9ZGN6|A0A5F9ZGN6_HUMAN Arginase OS=Homo sapiens OX=9606 GN=ARG1 PE=1 SV=1;sp|P05089|ARGI1_HUMAN Arginase-1 OS=Homo sapiens OX=9606 GN=ARG1 PE=1 SV=2	3	0	0	1	1	1	1	1	0	1	1	20.887	37063000	0	0	3384000	7953800	1414800	3890900	2606900	0	3057900	3546500
P50991	T-complex protein 1 subunit delta	CCT4	sp|P50991|TCPD_HUMAN T-complex protein 1 subunit delta OS=Homo sapiens OX=9606 GN=CCT4 PE=1 SV=4	1	1	0	0	0	0	0	0	0	0	0	20.824	3325700	970700	0	0	0	0	0	0	0	0	0
H7C452;Q9NVP1	ATP-dependent RNA helicase DDX18	DDX18	tr|H7C452|H7C452_HUMAN ATP-dependent RNA helicase DDX18 (Fragment) OS=Homo sapiens OX=9606 GN=DDX18 PE=1 SV=1;sp|Q9NVP1|DDX18_HUMAN ATP-dependent RNA helicase DDX18 OS=Homo sapiens OX=9606 GN=DDX18 PE=1 SV=2	2	2	0	1	0	3	1	2	0	0	1	20.775	31573000	6121300	0	1721600	0	13890000	1322700	1100700	0	0	4804600
P62805	Histone H4	HIST1H4A	sp|P62805|H4_HUMAN Histone H4 OS=Homo sapiens OX=9606 GN=H4C1 PE=1 SV=2	1	1	1	1	1	2	1	1	1	1	2	20.689	224700000	5276700	5443700	22433000	11628000	48469000	26255000	11244000	3012900	16596000	21074000
P18085;F5H0C7;C9JPM4;C9J1Z8;C9JAK5;F5H423;P84085;P84077;P61204	ADP-ribosylation factor 4;ADP-ribosylation factor 5;ADP-ribosylation factor 1;ADP-ribosylation factor 3	ARF4;ARF3;ARF5;ARF1	sp|P18085|ARF4_HUMAN ADP-ribosylation factor 4 OS=Homo sapiens OX=9606 GN=ARF4 PE=1 SV=3;tr|F5H0C7|F5H0C7_HUMAN ADP-ribosylation factor 3 (Fragment) OS=Homo sapiens OX=9606 GN=ARF3 PE=1 SV=1;tr|C9JPM4|C9JPM4_HUMAN ADP-ribosylation factor 4 (Fragment) OS=Ho	10	1	1	1	0	0	0	0	0	0	0	20.628	25227000	11581000	1331100	8754100	0	0	0	0	0	0	0
CON__P19013;P19013;CON__Q6NXH9;CON__Q32MB2;Q86Y46	Keratin, type II cytoskeletal 4;Keratin, type II cytoskeletal 73	KRT4;KRT73	;sp|P19013|K2C4_HUMAN Keratin, type II cytoskeletal 4 OS=Homo sapiens OX=9606 GN=KRT4 PE=1 SV=5;;;sp|Q86Y46|K2C73_HUMAN Keratin, type II cytoskeletal 73 OS=Homo sapiens OX=9606 GN=KRT73 PE=1 SV=1	6	0	0	0	0	0	0	1	1	0	1	20.477	92890000	0	0	0	0	0	0	13782000	10616000	0	16726000
P62081;B5MCP9;A0A2R8Y623	40S ribosomal protein S7	RPS7	sp|P62081|RS7_HUMAN 40S ribosomal protein S7 OS=Homo sapiens OX=9606 GN=RPS7 PE=1 SV=1;tr|B5MCP9|B5MCP9_HUMAN 40S ribosomal protein S7 OS=Homo sapiens OX=9606 GN=RPS7 PE=1 SV=1;tr|A0A2R8Y623|A0A2R8Y623_HUMAN 40S ribosomal protein S7 (Fragment) OS=Homo sapi	3	2	0	1	0	1	0	0	0	0	1	20.399	97587000	16656000	0	3277600	0	17660000	0	0	0	0	3903800
K7ESE8;J3KSD8;Q13867;K7ES02	Bleomycin hydrolase	BLMH	tr|K7ESE8|K7ESE8_HUMAN Bleomycin hydrolase (Fragment) OS=Homo sapiens OX=9606 GN=BLMH PE=1 SV=1;tr|J3KSD8|J3KSD8_HUMAN Bleomycin hydrolase (Fragment) OS=Homo sapiens OX=9606 GN=BLMH PE=1 SV=8;sp|Q13867|BLMH_HUMAN Bleomycin hydrolase OS=Homo sapiens OX=9606	4	0	0	1	0	1	0	3	0	0	2	20.329	41327000	0	0	3511300	0	8975700	0	11356000	0	0	11024000
Q7L7X3	Serine/threonine-protein kinase TAO1	TAOK1	sp|Q7L7X3|TAOK1_HUMAN Serine/threonine-protein kinase TAO1 OS=Homo sapiens OX=9606 GN=TAOK1 PE=1 SV=1	1	2	1	1	1	2	2	1	1	1	1	20.259	93843000	4661600	3432900	4730500	2842400	16541000	15157000	17352000	6022400	5432700	2790900
P61221;D6R9I9	ATP-binding cassette sub-family E member 1	ABCE1	sp|P61221|ABCE1_HUMAN ATP-binding cassette sub-family E member 1 OS=Homo sapiens OX=9606 GN=ABCE1 PE=1 SV=1;tr|D6R9I9|D6R9I9_HUMAN ATP-binding cassette sub-family E member 1 OS=Homo sapiens OX=9606 GN=ABCE1 PE=1 SV=1	2	1	2	0	1	3	0	2	0	1	0	20.217	25968000	2143900	2391000	0	1720400	9134000	0	4608900	0	5969900	0
P31944	Caspase-14;Caspase-14 subunit p17, mature form;Caspase-14 subunit p10, mature form;Caspase-14 subunit p20, intermediate form;Caspase-14 subunit p8, intermediate form	CASP14	sp|P31944|CASPE_HUMAN Caspase-14 OS=Homo sapiens OX=9606 GN=CASP14 PE=1 SV=2	1	0	1	2	2	2	1	2	1	2	0	20.203	99235000	0	1722100	11042000	10070000	14934000	11118000	7931900	6602000	15971000	0
P07954	Fumarate hydratase, mitochondrial	FH	sp|P07954|FUMH_HUMAN Fumarate hydratase, mitochondrial OS=Homo sapiens OX=9606 GN=FH PE=1 SV=3	1	0	0	0	0	0	0	0	0	0	1	20.096	8514600	0	0	0	0	0	0	0	0	0	2166500
C9JRH2;C9J3R0;C9JMJ4;C9JQZ4;C9JW69;P18754	Regulator of chromosome condensation	RCC1	tr|C9JRH2|C9JRH2_HUMAN Regulator of chromosome condensation (Fragment) OS=Homo sapiens OX=9606 GN=RCC1 PE=1 SV=1;tr|C9J3R0|C9J3R0_HUMAN Regulator of chromosome condensation (Fragment) OS=Homo sapiens OX=9606 GN=RCC1 PE=1 SV=9;tr|C9JMJ4|C9JMJ4_HUMAN Regulat	6	1	0	0	0	1	0	0	0	0	1	20.094	12566000	1326700	0	0	0	2592300	0	0	0	0	2751900
Q9NX58	Cell growth-regulating nucleolar protein	LYAR	sp|Q9NX58|LYAR_HUMAN Cell growth-regulating nucleolar protein OS=Homo sapiens OX=9606 GN=LYAR PE=1 SV=2	1	2	1	1	1	2	1	1	0	0	2	19.84	56889000	3919600	1133500	3388900	848350	18152000	5524100	2887300	0	0	3260300
CON__P01966				2	0	1	0	1	0	0	0	1	0	0	19.803	2317600	0	0	0	0	0	0	0	0	0	0
A0A0C4DGN4;Q96DA0;I3L1H9;I3L3X0	Zymogen granule protein 16 homolog B	ZG16B	tr|A0A0C4DGN4|A0A0C4DGN4_HUMAN Zymogen granule protein 16 homolog B OS=Homo sapiens OX=9606 GN=ZG16B PE=1 SV=1;sp|Q96DA0|ZG16B_HUMAN Zymogen granule protein 16 homolog B OS=Homo sapiens OX=9606 GN=ZG16B PE=1 SV=3;tr|I3L1H9|I3L1H9_HUMAN Zymogen granule prot	4	0	0	0	0	0	0	0	0	0	2	19.786	21214000	0	0	0	0	0	0	0	0	0	19147000
P62140;E9PMD7;F8VYE8;F8W0W8;P36873;P62136	Serine/threonine-protein phosphatase PP1-beta catalytic subunit;Serine/threonine-protein phosphatase;Serine/threonine-protein phosphatase PP1-gamma catalytic subunit;Serine/threonine-protein phosphatase PP1-alpha catalytic subunit	PPP1CB;PPP1CA;PPP1CC	sp|P62140|PP1B_HUMAN Serine/threonine-protein phosphatase PP1-beta catalytic subunit OS=Homo sapiens OX=9606 GN=PPP1CB PE=1 SV=3;tr|E9PMD7|E9PMD7_HUMAN Serine/threonine-protein phosphatase (Fragment) OS=Homo sapiens OX=9606 GN=PPP1CA PE=1 SV=1;tr|F8VYE8|F8	6	1	0	1	0	1	1	0	0	0	1	19.373	3668900	249550	0	934060	0	1011600	187120	0	0	0	0
P50990	T-complex protein 1 subunit theta	CCT8	sp|P50990|TCPQ_HUMAN T-complex protein 1 subunit theta OS=Homo sapiens OX=9606 GN=CCT8 PE=1 SV=4	3	3	1	1	1	0	0	1	0	1	1	19.227	22793000	9427600	2696200	1392600	1312800	0	0	4966000	0	1523800	1474100
E9PJ21;A0A087WWI4;K7EQK2;A0A087X054;A0A494C039;Q9Y4L1	Hypoxia up-regulated protein 1	HYOU1	tr|E9PJ21|E9PJ21_HUMAN Hypoxia up-regulated protein 1 (Fragment) OS=Homo sapiens OX=9606 GN=HYOU1 PE=1 SV=1;tr|A0A087WWI4|A0A087WWI4_HUMAN Hypoxia up-regulated protein 1 OS=Homo sapiens OX=9606 GN=HYOU1 PE=1 SV=1;tr|K7EQK2|K7EQK2_HUMAN Hypoxia up-regulated	6	0	0	0	0	0	0	0	0	0	0	18.763	1445000	0	0	0	0	0	0	0	0	0	0
Q02413	Desmoglein-1	DSG1	sp|Q02413|DSG1_HUMAN Desmoglein-1 OS=Homo sapiens OX=9606 GN=DSG1 PE=1 SV=2	1	0	0	1	0	0	0	0	0	0	1	18.669	23589000	0	0	1115400	0	0	0	0	0	0	2285000
P09228	Cystatin-SA	CST2	sp|P09228|CYTT_HUMAN Cystatin-SA OS=Homo sapiens OX=9606 GN=CST2 PE=1 SV=1	1	0	0	0	0	0	0	0	0	0	1	18.584	2928200	0	0	0	0	0	0	0	0	0	2928200
CON__Q29443;CON__Q0IIK2			;	2	0	0	0	0	0	0	0	0	0	0	18.552	2005800	0	0	0	0	0	0	0	0	0	0
P46821	Microtubule-associated protein 1B;MAP1B heavy chain;MAP1 light chain LC1	MAP1B	sp|P46821|MAP1B_HUMAN Microtubule-associated protein 1B OS=Homo sapiens OX=9606 GN=MAP1B PE=1 SV=2	1	0	0	1	0	0	0	0	0	0	0	18.539	0	0	0	0	0	0	0	0	0	0	0
Q9UHV9	Prefoldin subunit 2	PFDN2	sp|Q9UHV9|PFD2_HUMAN Prefoldin subunit 2 OS=Homo sapiens OX=9606 GN=PFDN2 PE=1 SV=1	1	0	0	0	0	0	0	0	0	0	0	18.519	1265800	0	0	0	0	0	0	0	0	0	0
K7EJM5;A0A087WX29;A0A0A0N0M3;K7EN94;B1AKP7;G3V162;A0A087X260;A0A087WYY0;Q13148;K7EJ99;A0A0A0MSV7;A0A087WXQ5;A0A087WV68;A0A1W2PNU8	TAR DNA-binding protein 43	TARDBP;TDP43	tr|K7EJM5|K7EJM5_HUMAN TAR DNA-binding protein 43 (Fragment) OS=Homo sapiens OX=9606 GN=TARDBP PE=1 SV=1;tr|A0A087WX29|A0A087WX29_HUMAN TAR DNA-binding protein 43 (Fragment) OS=Homo sapiens OX=9606 GN=TARDBP PE=1 SV=1;tr|A0A0A0N0M3|A0A0A0N0M3_HUMAN TAR DNA	14	1	2	2	2	1	0	0	0	1	0	18.497	29892000	2413000	4792100	7150200	5297200	2405700	0	0	0	1522600	0
Q5JR95;P62241	40S ribosomal protein S8	RPS8	tr|Q5JR95|Q5JR95_HUMAN 40S ribosomal protein S8 OS=Homo sapiens OX=9606 GN=RPS8 PE=1 SV=1;sp|P62241|RS8_HUMAN 40S ribosomal protein S8 OS=Homo sapiens OX=9606 GN=RPS8 PE=1 SV=2	2	2	0	2	0	2	0	1	0	0	1	18.452	14351000	1625200	0	2830300	0	1971700	0	1693200	0	0	2867700
A0A1B0GVZ8			tr|A0A1B0GVZ8|A0A1B0GVZ8_HUMAN Histone-lysine N-methyltransferase EHMT1 (Fragment) OS=Homo sapiens OX=9606 GN=EHMT1 PE=1 SV=1	1	1	0	0	1	1	1	0	0	0	0	18.323	0	0	0	0	0	0	0	0	0	0	0
Q01780	Exosome component 10	EXOSC10	sp|Q01780|EXOSX_HUMAN Exosome component 10 OS=Homo sapiens OX=9606 GN=EXOSC10 PE=1 SV=2	2	0	1	2	2	0	2	0	1	1	1	17.829	52102000	0	3542900	7735600	5159700	0	6592500	0	3594000	5467400	2586800
Q02790	Peptidyl-prolyl cis-trans isomerase FKBP4;Peptidyl-prolyl cis-trans isomerase FKBP4, N-terminally processed	FKBP4	sp|Q02790|FKBP4_HUMAN Peptidyl-prolyl cis-trans isomerase FKBP4 OS=Homo sapiens OX=9606 GN=FKBP4 PE=1 SV=3	2	2	0	0	0	1	0	0	0	0	1	17.698	11163000	2945300	0	0	0	2218500	0	0	0	0	3036400
A0A494BZV2;Q6WCQ1;J3KSK7	Myosin phosphatase Rho-interacting protein	MPRIP	tr|A0A494BZV2|A0A494BZV2_HUMAN Myosin phosphatase Rho-interacting protein OS=Homo sapiens OX=9606 GN=MPRIP PE=1 SV=1;sp|Q6WCQ1|MPRIP_HUMAN Myosin phosphatase Rho-interacting protein OS=Homo sapiens OX=9606 GN=MPRIP PE=1 SV=3;tr|J3KSK7|J3KSK7_HUMAN Myosin p	7	0	0	0	0	0	0	0	0	3	0	17.503	3210000	0	0	0	0	0	0	0	0	3210000	0
A0A0C4DG89;Q7L014	Probable ATP-dependent RNA helicase DDX46	DDX46	tr|A0A0C4DG89|A0A0C4DG89_HUMAN Probable ATP-dependent RNA helicase DDX46 OS=Homo sapiens OX=9606 GN=DDX46 PE=1 SV=1;sp|Q7L014|DDX46_HUMAN Probable ATP-dependent RNA helicase DDX46 OS=Homo sapiens OX=9606 GN=DDX46 PE=1 SV=2	3	0	0	0	0	2	0	0	0	0	0	17.463	2427900	0	0	0	0	1688300	0	0	0	0	0
A0A2R8Y8A0;E7ETK0;A0A2R8Y849;A0A2R8YD14;P62847	40S ribosomal protein S24	RPS24	tr|A0A2R8Y8A0|A0A2R8Y8A0_HUMAN 40S ribosomal protein S24 (Fragment) OS=Homo sapiens OX=9606 GN=RPS24 PE=1 SV=1;tr|E7ETK0|E7ETK0_HUMAN 40S ribosomal protein S24 OS=Homo sapiens OX=9606 GN=RPS24 PE=1 SV=1;tr|A0A2R8Y849|A0A2R8Y849_HUMAN 40S ribosomal protein	5	1	1	1	1	1	1	1	1	1	1	17.254	101630000	7888400	7204900	6999700	5830200	7298100	5075700	9956100	8240200	9305300	5661900
P51991	Heterogeneous nuclear ribonucleoprotein A3	HNRNPA3	sp|P51991|ROA3_HUMAN Heterogeneous nuclear ribonucleoprotein A3 OS=Homo sapiens OX=9606 GN=HNRNPA3 PE=1 SV=2	1	0	0	1	1	0	0	0	0	0	0	17.098	11704000	0	0	5369000	6335100	0	0	0	0	0	0
P09382	Galectin-1	LGALS1	sp|P09382|LEG1_HUMAN Galectin-1 OS=Homo sapiens OX=9606 GN=LGALS1 PE=1 SV=2	1	0	0	0	0	0	0	0	0	0	1	17.067	10186000	0	0	0	0	0	0	0	0	0	3762800
E9PN89;E9PKE3;P11142;E9PI65;E9PLF4;P54652	Heat shock cognate 71 kDa protein;Heat shock-related 70 kDa protein 2	HSPA8;HSPA2	tr|E9PN89|E9PN89_HUMAN Heat shock cognate 71 kDa protein (Fragment) OS=Homo sapiens OX=9606 GN=HSPA8 PE=1 SV=1;tr|E9PKE3|E9PKE3_HUMAN Heat shock cognate 71 kDa protein OS=Homo sapiens OX=9606 GN=HSPA8 PE=1 SV=1;sp|P11142|HSP7C_HUMAN Heat shock cognate 71 k	13	1	0	0	0	0	0	0	0	0	0	17.066	1403000	1239500	0	0	0	0	0	0	0	0	0
P30050	60S ribosomal protein L12	RPL12	sp|P30050|RL12_HUMAN 60S ribosomal protein L12 OS=Homo sapiens OX=9606 GN=RPL12 PE=1 SV=1	1	1	1	1	1	1	1	1	0	1	1	17.012	58687000	3714600	7201000	4156100	3829000	8515700	4312700	3862300	0	11193000	2782100
P49736;H0Y8E6	DNA replication licensing factor MCM2	MCM2	sp|P49736|MCM2_HUMAN DNA replication licensing factor MCM2 OS=Homo sapiens OX=9606 GN=MCM2 PE=1 SV=4;tr|H0Y8E6|H0Y8E6_HUMAN DNA helicase (Fragment) OS=Homo sapiens OX=9606 GN=MCM2 PE=1 SV=1	2	0	1	0	0	0	0	0	0	0	0	16.797	2941400	0	1212500	0	0	0	0	0	0	0	0
Q8NC51	Plasminogen activator inhibitor 1 RNA-binding protein	SERBP1	sp|Q8NC51|PAIRB_HUMAN Plasminogen activator inhibitor 1 RNA-binding protein OS=Homo sapiens OX=9606 GN=SERBP1 PE=1 SV=2	1	1	1	1	1	1	1	0	1	1	1	16.79	60618000	6069500	5861400	9596900	5177500	6361200	4380500	0	3378900	5069700	4566900
G3V5R3;G3V3A4;Q13573	SNW domain-containing protein 1	SNW1	tr|G3V5R3|G3V5R3_HUMAN SNW domain-containing protein 1 (Fragment) OS=Homo sapiens OX=9606 GN=SNW1 PE=1 SV=1;tr|G3V3A4|G3V3A4_HUMAN SNW domain-containing protein 1 OS=Homo sapiens OX=9606 GN=SNW1 PE=1 SV=1;sp|Q13573|SNW1_HUMAN SNW domain-containing protein	3	1	1	1	1	1	1	0	1	1	1	16.728	38201000	4134200	4243400	4385300	3410100	4332000	2603900	0	2657900	3020600	2819700
Q5JYR4;Q5JYR7;P04844	Dolichyl-diphosphooligosaccharide--protein glycosyltransferase subunit 2	RPN2	tr|Q5JYR4|Q5JYR4_HUMAN Dolichyl-diphosphooligosaccharide--protein glycosyltransferase subunit 2 (Fragment) OS=Homo sapiens OX=9606 GN=RPN2 PE=1 SV=8;tr|Q5JYR7|Q5JYR7_HUMAN Dolichyl-diphosphooligosaccharide--protein glycosyltransferase subunit 2 (Fragment)	3	0	0	0	0	0	0	0	0	0	0	16.599	1754900	0	0	0	0	0	0	0	0	0	0
A0A087WY09;Q15361	Transcription termination factor 1	TTF1	tr|A0A087WY09|A0A087WY09_HUMAN Transcription termination factor 1 OS=Homo sapiens OX=9606 GN=TTF1 PE=1 SV=1;sp|Q15361|TTF1_HUMAN Transcription termination factor 1 OS=Homo sapiens OX=9606 GN=TTF1 PE=1 SV=3	2	1	1	1	0	1	0	0	0	1	1	16.525	16606000	0	2026300	0	0	4541200	0	0	0	1822400	2422900
Q9NZI8	Insulin-like growth factor 2 mRNA-binding protein 1	IGF2BP1	sp|Q9NZI8|IF2B1_HUMAN Insulin-like growth factor 2 mRNA-binding protein 1 OS=Homo sapiens OX=9606 GN=IGF2BP1 PE=1 SV=2	1	1	1	1	1	1	1	0	0	1	0	16.313	18511000	1216400	1487300	2168100	2786800	2381300	2283900	0	0	968720	0
Q96Q89	Kinesin-like protein KIF20B	KIF20B	sp|Q96Q89|KI20B_HUMAN Kinesin-like protein KIF20B OS=Homo sapiens OX=9606 GN=KIF20B PE=1 SV=3	1	0	1	0	1	0	0	0	1	1	0	15.898	5261700	0	2580500	0	0	0	0	0	2681200	0	0
P52209;K7EMN2;K7EM49;K7ELN9	6-phosphogluconate dehydrogenase, decarboxylating	PGD	sp|P52209|6PGD_HUMAN 6-phosphogluconate dehydrogenase, decarboxylating OS=Homo sapiens OX=9606 GN=PGD PE=1 SV=3;tr|K7EMN2|K7EMN2_HUMAN 6-phosphogluconate dehydrogenase, decarboxylating (Fragment) OS=Homo sapiens OX=9606 GN=PGD PE=1 SV=1;tr|K7EM49|K7EM49_HU	4	2	1	0	0	0	0	0	0	0	0	15.793	3925000	2076500	1848500	0	0	0	0	0	0	0	0
F8VRJ2;H0YHC3;F8W020;F8W118;F8VXI6;F8VUX1;F8VY35;F8VV59;B7Z9C2;F8W0J6;F5H4R6;H0YIV4;P55209	Nucleosome assembly protein 1-like 1	NAP1L1	tr|F8VRJ2|F8VRJ2_HUMAN Nucleosome assembly protein 1-like 1 (Fragment) OS=Homo sapiens OX=9606 GN=NAP1L1 PE=1 SV=1;tr|H0YHC3|H0YHC3_HUMAN Nucleosome assembly protein 1-like 1 (Fragment) OS=Homo sapiens OX=9606 GN=NAP1L1 PE=1 SV=1;tr|F8W020|F8W020_HUMAN Nuc	13	1	1	1	1	1	1	1	0	1	1	15.761	50466000	4994800	2834300	6364400	7560600	5652000	4184900	3807300	0	1959500	2798900
P62701	40S ribosomal protein S4, X isoform	RPS4X	sp|P62701|RS4X_HUMAN 40S ribosomal protein S4, X isoform OS=Homo sapiens OX=9606 GN=RPS4X PE=1 SV=2	1	1	1	0	0	1	1	0	0	0	1	15.735	19233000	2842800	1945900	0	0	5097900	2504500	0	0	0	674250
H3BMC9;Q1ED39	Lysine-rich nucleolar protein 1	KNOP1	tr|H3BMC9|H3BMC9_HUMAN Lysine-rich nucleolar protein 1 (Fragment) OS=Homo sapiens OX=9606 GN=KNOP1 PE=1 SV=1;sp|Q1ED39|KNOP1_HUMAN Lysine-rich nucleolar protein 1 OS=Homo sapiens OX=9606 GN=KNOP1 PE=1 SV=1	2	1	1	1	1	1	1	0	0	1	0	15.701	13060000	0	940390	0	839980	3091300	2477100	0	0	1611300	0
P26639	Threonine--tRNA ligase, cytoplasmic	TARS	sp|P26639|SYTC_HUMAN Threonine--tRNA ligase 1, cytoplasmic OS=Homo sapiens OX=9606 GN=TARS1 PE=1 SV=3	1	1	0	0	0	0	0	0	0	1	0	15.55	4539900	1413400	0	0	0	0	0	0	0	771880	0
P12273	Prolactin-inducible protein	PIP	sp|P12273|PIP_HUMAN Prolactin-inducible protein OS=Homo sapiens OX=9606 GN=PIP PE=1 SV=1	1	0	0	2	1	1	1	0	0	0	1	15.515	42956000	0	0	6295100	5766400	5409900	4325000	0	0	0	6158200
Q9UMS4	Pre-mRNA-processing factor 19	PRPF19	sp|Q9UMS4|PRP19_HUMAN Pre-mRNA-processing factor 19 OS=Homo sapiens OX=9606 GN=PRPF19 PE=1 SV=1	1	0	0	0	0	0	0	0	0	0	0	15.269	4045300	0	0	0	0	0	0	0	0	0	0
K7ELA4;B5MD17;J3KS05;Q13185;P83916	Chromobox protein homolog 3;Chromobox protein homolog 1	CBX1;CBX3	tr|K7ELA4|K7ELA4_HUMAN Chromobox protein homolog 1 OS=Homo sapiens OX=9606 GN=CBX1 PE=1 SV=1;tr|B5MD17|B5MD17_HUMAN Chromobox protein homolog 1 (Fragment) OS=Homo sapiens OX=9606 GN=CBX1 PE=1 SV=1;tr|J3KS05|J3KS05_HUMAN Chromobox protein homolog 1 (Fragmen	5	0	0	0	0	0	0	0	0	0	0	15.242	6035100	0	0	0	0	0	0	0	0	0	0
P60201;B1B1G1;B1B1G2;B1B1G3;B1B1G4;B1B1G6	Myelin proteolipid protein	PLP1	sp|P60201|MYPR_HUMAN Myelin proteolipid protein OS=Homo sapiens OX=9606 GN=PLP1 PE=1 SV=2;tr|B1B1G1|B1B1G1_HUMAN Myelin proteolipid protein (Fragment) OS=Homo sapiens OX=9606 GN=PLP1 PE=1 SV=1;tr|B1B1G2|B1B1G2_HUMAN Myelin proteolipid protein (Fragment) OS	6	0	1	0	1	0	1	0	1	2	0	15.192	21613000	0	3342800	0	3639600	0	2968000	0	2303300	4732100	0
CON__Q9TRI1				1	0	0	0	0	0	0	0	0	0	0	15.077	4173400	0	0	0	0	0	0	0	0	0	0
Q08554	Desmocollin-1	DSC1	sp|Q08554|DSC1_HUMAN Desmocollin-1 OS=Homo sapiens OX=9606 GN=DSC1 PE=1 SV=2	1	0	0	1	1	1	1	2	1	1	1	15.012	27113000	0	0	2026600	1526600	1771200	2445300	5639700	1772700	1860900	2769200
P00505	Aspartate aminotransferase, mitochondrial	GOT2	sp|P00505|AATM_HUMAN Aspartate aminotransferase, mitochondrial OS=Homo sapiens OX=9606 GN=GOT2 PE=1 SV=3	1	0	0	0	0	0	0	0	0	0	0	14.738	2146000	0	0	0	0	0	0	0	0	0	0
J3KTA4;P17844	Probable ATP-dependent RNA helicase DDX5	DDX5	tr|J3KTA4|J3KTA4_HUMAN Probable ATP-dependent RNA helicase DDX5 OS=Homo sapiens OX=9606 GN=DDX5 PE=1 SV=1;sp|P17844|DDX5_HUMAN Probable ATP-dependent RNA helicase DDX5 OS=Homo sapiens OX=9606 GN=DDX5 PE=1 SV=1	4	1	1	1	0	2	2	1	1	1	0	14.692	84235000	5668500	4664300	13951000	0	17504000	13452000	2938000	3628000	5994300	0
F8WEI3;F8WDT8;G3V0G3;Q9NY93	Probable ATP-dependent RNA helicase DDX56	DDX56	tr|F8WEI3|F8WEI3_HUMAN Probable ATP-dependent RNA helicase DDX56 OS=Homo sapiens OX=9606 GN=DDX56 PE=1 SV=1;tr|F8WDT8|F8WDT8_HUMAN Probable ATP-dependent RNA helicase DDX56 OS=Homo sapiens OX=9606 GN=DDX56 PE=1 SV=1;tr|G3V0G3|G3V0G3_HUMAN DEAD (Asp-Glu-Ala	4	2	0	1	0	1	0	0	0	0	2	14.623	20528000	3600700	0	2286500	0	6640700	0	0	0	0	6765800
F5H6N1;P61326;Q96A72	Protein mago nashi homolog;Protein mago nashi homolog 2	MAGOHB;MAGOH	tr|F5H6N1|F5H6N1_HUMAN Protein mago nashi homolog 2 OS=Homo sapiens OX=9606 GN=MAGOHB PE=1 SV=1;sp|P61326|MGN_HUMAN Protein mago nashi homolog OS=Homo sapiens OX=9606 GN=MAGOH PE=1 SV=1;sp|Q96A72|MGN2_HUMAN Protein mago nashi homolog 2 OS=Homo sapiens OX=9	3	0	0	0	1	0	1	0	0	0	0	14.621	2613200	0	0	0	1015900	0	1597300	0	0	0	0
P35251;H0Y8U4	Replication factor C subunit 1	RFC1	sp|P35251|RFC1_HUMAN Replication factor C subunit 1 OS=Homo sapiens OX=9606 GN=RFC1 PE=1 SV=4;tr|H0Y8U4|H0Y8U4_HUMAN Replication factor C subunit 1 (Fragment) OS=Homo sapiens OX=9606 GN=RFC1 PE=1 SV=1	2	0	0	0	0	1	1	0	0	0	0	14.592	9506400	0	0	0	0	2359900	1282400	0	0	0	0
Q9UQ80;F8VR77	Proliferation-associated protein 2G4	PA2G4	sp|Q9UQ80|PA2G4_HUMAN Proliferation-associated protein 2G4 OS=Homo sapiens OX=9606 GN=PA2G4 PE=1 SV=3;tr|F8VR77|F8VR77_HUMAN Proliferation-associated protein 2G4 OS=Homo sapiens OX=9606 GN=PA2G4 PE=1 SV=1	2	0	0	1	0	1	0	1	0	0	1	14.459	19433000	0	0	1294500	0	2535700	0	6021900	0	0	2632200
M0R0P1;M0R299;M0QXL5;M0R2Q4;P22087	rRNA 2-O-methyltransferase fibrillarin	FBL	tr|M0R0P1|M0R0P1_HUMAN rRNA 2-O-methyltransferase fibrillarin (Fragment) OS=Homo sapiens OX=9606 GN=FBL PE=1 SV=1;tr|M0R299|M0R299_HUMAN rRNA 2-O-methyltransferase fibrillarin (Fragment) OS=Homo sapiens OX=9606 GN=FBL PE=1 SV=1;tr|M0QXL5|M0QXL5_HUMAN rRN	5	0	1	1	1	1	1	0	0	1	0	14.432	37384000	0	3977000	4052200	3053700	6126100	7954900	0	0	5441900	0
P50454;H0YEP8;E9PQ34;E9PJH8;E9PIG2;E9PRS3;E9PKH2;E9PNX1;E9PK86;E9PMI5;E9PR70;E9PPV6	Serpin H1	SERPINH1	sp|P50454|SERPH_HUMAN Serpin H1 OS=Homo sapiens OX=9606 GN=SERPINH1 PE=1 SV=2;tr|H0YEP8|H0YEP8_HUMAN Serpin H1 (Fragment) OS=Homo sapiens OX=9606 GN=SERPINH1 PE=1 SV=1;tr|E9PQ34|E9PQ34_HUMAN Serpin H1 (Fragment) OS=Homo sapiens OX=9606 GN=SERPINH1 PE=1 SV=	12	2	0	1	1	1	0	1	0	0	0	14.23	14784000	6146200	0	1844700	1192700	1660900	0	2092800	0	0	0
O43143	Pre-mRNA-splicing factor ATP-dependent RNA helicase DHX15	DHX15	sp|O43143|DHX15_HUMAN Pre-mRNA-splicing factor ATP-dependent RNA helicase DHX15 OS=Homo sapiens OX=9606 GN=DHX15 PE=1 SV=2	1	0	1	0	1	1	1	0	0	0	0	14.222	9750200	0	1141200	0	0	3875700	1956000	0	0	0	0
P55072	Transitional endoplasmic reticulum ATPase	VCP	sp|P55072|TERA_HUMAN Transitional endoplasmic reticulum ATPase OS=Homo sapiens OX=9606 GN=VCP PE=1 SV=4	1	0	0	0	0	1	0	0	0	0	0	14.205	757290	0	0	0	0	0	0	0	0	0	0
H0YDS9;E9PRH9;H0YF33;Q5T624;P49321	Nuclear autoantigenic sperm protein	NASP	tr|H0YDS9|H0YDS9_HUMAN Nuclear autoantigenic sperm protein (Fragment) OS=Homo sapiens OX=9606 GN=NASP PE=1 SV=1;tr|E9PRH9|E9PRH9_HUMAN Nuclear autoantigenic sperm protein (Fragment) OS=Homo sapiens OX=9606 GN=NASP PE=1 SV=1;tr|H0YF33|H0YF33_HUMAN Nuclear a	5	0	0	0	0	0	0	0	0	0	0	14.154	4482200	0	0	0	0	0	0	0	0	0	0
Q13523;H0YDJ3	Serine/threonine-protein kinase PRP4 homolog	PRPF4B	sp|Q13523|PRP4B_HUMAN Serine/threonine-protein kinase PRP4 homolog OS=Homo sapiens OX=9606 GN=PRPF4B PE=1 SV=3;tr|H0YDJ3|H0YDJ3_HUMAN Serine/threonine-protein kinase PRP4 homolog (Fragment) OS=Homo sapiens OX=9606 GN=PRPF4B PE=1 SV=1	2	2	2	1	1	1	1	1	1	1	2	14.103	75728000	9663800	9949100	5866700	6235300	10423000	6510900	4916600	5154700	4264500	4791400
Q15084	Protein disulfide-isomerase A6	PDIA6	sp|Q15084|PDIA6_HUMAN Protein disulfide-isomerase A6 OS=Homo sapiens OX=9606 GN=PDIA6 PE=1 SV=1	1	1	1	1	1	0	1	0	0	1	0	14.101	12940000	3594700	3392800	0	1457200	0	1313900	0	0	1516800	0
P81605	Dermcidin;Survival-promoting peptide;DCD-1	DCD	sp|P81605|DCD_HUMAN Dermcidin OS=Homo sapiens OX=9606 GN=DCD PE=1 SV=2	1	0	0	2	1	1	0	0	0	0	0	14.074	33214000	0	0	20832000	4289900	2778600	0	0	0	0	0
K7ES11;Q9C0C9	E2/E3 hybrid ubiquitin-protein ligase UBE2O	UBE2O	tr|K7ES11|K7ES11_HUMAN (E3-independent) E2 ubiquitin-conjugating enzyme (Fragment) OS=Homo sapiens OX=9606 GN=UBE2O PE=1 SV=1;sp|Q9C0C9|UBE2O_HUMAN (E3-independent) E2 ubiquitin-conjugating enzyme OS=Homo sapiens OX=9606 GN=UBE2O PE=1 SV=3	2	0	1	1	0	0	0	0	0	1	0	13.978	10909000	0	3507500	1968800	0	0	0	0	0	1776500	0
CON__ENSEMBL:ENSBTAP00000024146				1	0	0	0	0	0	0	0	0	0	0	13.882	6132800	0	0	0	0	0	0	0	0	0	0
E9PL69;P23921	Ribonucleoside-diphosphate reductase large subunit	RRM1	tr|E9PL69|E9PL69_HUMAN Ribonucleoside-diphosphate reductase large subunit OS=Homo sapiens OX=9606 GN=RRM1 PE=1 SV=1;sp|P23921|RIR1_HUMAN Ribonucleoside-diphosphate reductase large subunit OS=Homo sapiens OX=9606 GN=RRM1 PE=1 SV=1	2	0	1	0	0	0	0	0	0	0	1	13.872	6253100	0	4412700	0	0	0	0	0	0	0	0
H7C3V5;G3V0E5;P02786	Transferrin receptor protein 1;Transferrin receptor protein 1, serum form	TFRC	tr|H7C3V5|H7C3V5_HUMAN Transferrin receptor protein 1 (Fragment) OS=Homo sapiens OX=9606 GN=TFRC PE=1 SV=1;tr|G3V0E5|G3V0E5_HUMAN Transferrin receptor (P90, CD71), isoform CRA_c OS=Homo sapiens OX=9606 GN=TFRC PE=1 SV=1;sp|P02786|TFR1_HUMAN Transferrin rec	3	0	1	0	0	0	0	0	0	0	1	13.764	2398100	0	0	0	0	0	0	0	0	0	1193900
P62244;I3L3P7;I3L246;H3BN98	40S ribosomal protein S15a	RPS15A	sp|P62244|RS15A_HUMAN 40S ribosomal protein S15a OS=Homo sapiens OX=9606 GN=RPS15A PE=1 SV=2;tr|I3L3P7|I3L3P7_HUMAN 40S ribosomal protein S15a OS=Homo sapiens OX=9606 GN=RPS15A PE=1 SV=1;tr|I3L246|I3L246_HUMAN 40S ribosomal protein S15a OS=Homo sapiens OX=	4	1	1	1	0	1	1	2	0	2	1	13.708	42325000	4944200	3770400	3681800	0	7401200	1572800	5485200	0	2401200	1978100
CON__Q3LI72;Q3LI72	Keratin-associated protein 19-5	KRTAP19-5	;sp|Q3LI72|KR195_HUMAN Keratin-associated protein 19-5 OS=Homo sapiens OX=9606 GN=KRTAP19-5 PE=1 SV=1	2	0	0	0	0	1	1	0	0	0	0	13.688	4644600	0	0	0	0	2457100	2187400	0	0	0	0
A0A0A6YYJ8;Q9Y383	Putative RNA-binding protein Luc7-like 2	LUC7L2	tr|A0A0A6YYJ8|A0A0A6YYJ8_HUMAN Putative RNA-binding protein Luc7-like 2 OS=Homo sapiens OX=9606 GN=LUC7L2 PE=4 SV=1;sp|Q9Y383|LC7L2_HUMAN Putative RNA-binding protein Luc7-like 2 OS=Homo sapiens OX=9606 GN=LUC7L2 PE=1 SV=2	2	0	0	1	0	0	0	0	0	0	1	13.51	693930	0	0	0	0	0	0	0	0	0	693930
J3KRB3;A0A087WWH0;J3QS96;A0A087WXM6;J3QQT2;J3QLC8;J3KRX5;A0A0A0MRF8;A0A0A6YYL6;P18621;A0A087WY81	60S ribosomal protein L17	RPL17;RPL17-C18orf32	tr|J3KRB3|J3KRB3_HUMAN 60S ribosomal protein L17 (Fragment) OS=Homo sapiens OX=9606 GN=RPL17 PE=1 SV=3;tr|A0A087WWH0|A0A087WWH0_HUMAN 60S ribosomal protein L17 (Fragment) OS=Homo sapiens OX=9606 GN=RPL17 PE=1 SV=6;tr|J3QS96|J3QS96_HUMAN 60S ribosomal prote	11	0	0	0	0	1	0	0	0	0	1	13.437	12351000	0	0	0	0	0	0	0	0	0	4470100
P31151;Q86SG5	Protein S100-A7;Protein S100-A7A	S100A7;S100A7A	sp|P31151|S10A7_HUMAN Protein S100-A7 OS=Homo sapiens OX=9606 GN=S100A7 PE=1 SV=4;sp|Q86SG5|S1A7A_HUMAN Protein S100-A7A OS=Homo sapiens OX=9606 GN=S100A7A PE=1 SV=3	2	0	0	1	1	1	1	1	1	1	2	13.42	319820000	0	0	69952000	25865000	12089000	6841400	46500000	9040200	8928300	30380000
CON__Q3ZBS7;P04004	Vitronectin;Vitronectin V65 subunit;Vitronectin V10 subunit;Somatomedin-B	VTN	;sp|P04004|VTNC_HUMAN Vitronectin OS=Homo sapiens OX=9606 GN=VTN PE=1 SV=1	2	1	0	0	1	0	1	0	0	0	1	13.179	10897000	2793500	0	0	3202100	0	2246100	0	0	0	1126000
H0YK49;H0YL12;H0YNX6;P13804;H0YKF0;H0YLU7	Electron transfer flavoprotein subunit alpha, mitochondrial	ETFA	tr|H0YK49|H0YK49_HUMAN Electron transfer flavoprotein subunit alpha OS=Homo sapiens OX=9606 GN=ETFA PE=1 SV=1;tr|H0YL12|H0YL12_HUMAN Electron transfer flavoprotein subunit alpha, mitochondrial (Fragment) OS=Homo sapiens OX=9606 GN=ETFA PE=1 SV=8;tr|H0YNX6|	6	0	0	1	0	0	0	0	0	0	0	13.153	5705300	0	0	1887300	0	0	0	0	0	0	0
P33993;C9J8M6	DNA replication licensing factor MCM7	MCM7	sp|P33993|MCM7_HUMAN DNA replication licensing factor MCM7 OS=Homo sapiens OX=9606 GN=MCM7 PE=1 SV=4;tr|C9J8M6|C9J8M6_HUMAN DNA replication licensing factor MCM7 (Fragment) OS=Homo sapiens OX=9606 GN=MCM7 PE=1 SV=1	2	2	1	0	0	0	0	0	0	0	0	13.104	6611400	5351500	1260000	0	0	0	0	0	0	0	0
Q9UG63	ATP-binding cassette sub-family F member 2	ABCF2	sp|Q9UG63|ABCF2_HUMAN ATP-binding cassette sub-family F member 2 OS=Homo sapiens OX=9606 GN=ABCF2 PE=1 SV=2	1	1	1	0	0	1	0	0	0	0	0	13.016	9914600	702220	3331700	0	0	2690300	0	0	0	0	0
F8VPD4;P27708	CAD protein;Glutamine-dependent carbamoyl-phosphate synthase;Aspartate carbamoyltransferase;Dihydroorotase	CAD	tr|F8VPD4|F8VPD4_HUMAN CAD protein OS=Homo sapiens OX=9606 GN=CAD PE=1 SV=1;sp|P27708|PYR1_HUMAN CAD protein OS=Homo sapiens OX=9606 GN=CAD PE=1 SV=3	2	1	0	1	0	1	0	0	0	0	0	13.008	8023800	3932400	0	1087900	0	1217900	0	0	0	0	0
A0A3B3IRI2;P17812;A0A3B3ITB8;B4E1E0;A0A3B3IRQ8;A0A3B3ITF6	CTP synthase 1;CTP synthase	CTPS1	tr|A0A3B3IRI2|A0A3B3IRI2_HUMAN CTP synthase OS=Homo sapiens OX=9606 GN=CTPS1 PE=1 SV=1;sp|P17812|PYRG1_HUMAN CTP synthase 1 OS=Homo sapiens OX=9606 GN=CTPS1 PE=1 SV=2;tr|A0A3B3ITB8|A0A3B3ITB8_HUMAN CTP synthase 1 OS=Homo sapiens OX=9606 GN=CTPS1 PE=1 SV=1;	6	2	2	1	1	1	0	0	0	0	0	12.932	28392000	5222300	10674000	2927300	3295000	3182200	0	0	0	0	0
H0YEX5;E9PPJ0;Q13435	Splicing factor 3B subunit 2	SF3B2	tr|H0YEX5|H0YEX5_HUMAN Splicing factor 3B subunit 2 (Fragment) OS=Homo sapiens OX=9606 GN=SF3B2 PE=1 SV=1;tr|E9PPJ0|E9PPJ0_HUMAN Splicing factor 3B subunit 2 OS=Homo sapiens OX=9606 GN=SF3B2 PE=1 SV=1;sp|Q13435|SF3B2_HUMAN Splicing factor 3B subunit 2 OS=H	3	0	0	0	0	0	0	0	0	0	0	12.824	1495300	0	0	0	0	0	0	0	0	0	0
Q99459	Cell division cycle 5-like protein	CDC5L	sp|Q99459|CDC5L_HUMAN Cell division cycle 5-like protein OS=Homo sapiens OX=9606 GN=CDC5L PE=1 SV=2	1	1	1	1	1	2	1	0	1	0	1	12.795	21207000	2424900	1499600	2253000	2315200	5107900	2339100	0	1993900	0	2113000
P07355;A6NMY6;H0YN28;H0YL33;H0YM50;H0YN42	Annexin A2;Putative annexin A2-like protein;Annexin	ANXA2;ANXA2P2	sp|P07355|ANXA2_HUMAN Annexin A2 OS=Homo sapiens OX=9606 GN=ANXA2 PE=1 SV=2;sp|A6NMY6|AXA2L_HUMAN Putative annexin A2-like protein OS=Homo sapiens OX=9606 GN=ANXA2P2 PE=5 SV=2;tr|H0YN28|H0YN28_HUMAN Annexin (Fragment) OS=Homo sapiens OX=9606 GN=ANXA2 PE=1	6	0	0	1	1	1	1	1	0	1	2	12.762	19078000	0	0	2067400	1686200	1748200	1042300	1840800	0	1461700	4180800
F5H3C5;F5H4R2;F5GYZ5;P04179	Superoxide dismutase [Mn], mitochondrial	SOD2	tr|F5H3C5|F5H3C5_HUMAN Superoxide dismutase (Fragment) OS=Homo sapiens OX=9606 GN=SOD2 PE=1 SV=1;tr|F5H4R2|F5H4R2_HUMAN Superoxide dismutase (Fragment) OS=Homo sapiens OX=9606 GN=SOD2 PE=1 SV=1;tr|F5GYZ5|F5GYZ5_HUMAN Superoxide dismutase (Fragment) OS=Homo	4	0	0	0	0	0	0	0	0	0	0	12.647	4494900	0	0	0	0	0	0	0	0	0	0
K7ENG2;P26368	Splicing factor U2AF 65 kDa subunit	U2AF2	tr|K7ENG2|K7ENG2_HUMAN U2 snRNP auxiliary factor large subunit OS=Homo sapiens OX=9606 GN=U2AF2 PE=1 SV=1;sp|P26368|U2AF2_HUMAN Splicing factor U2AF 65 kDa subunit OS=Homo sapiens OX=9606 GN=U2AF2 PE=1 SV=4	2	0	0	1	1	1	0	0	0	0	0	12.527	11760000	0	0	4665200	2210700	4883900	0	0	0	0	0
P49773	Histidine triad nucleotide-binding protein 1	HINT1	sp|P49773|HINT1_HUMAN Histidine triad nucleotide-binding protein 1 OS=Homo sapiens OX=9606 GN=HINT1 PE=1 SV=2	1	0	0	0	0	0	0	0	0	0	1	12.474	20354000	0	0	0	0	0	0	0	0	0	5594400
E7EX53;A0A2R8Y738;A0A2R8YEM3;E7EQV9;P61313;E7ENU7	Ribosomal protein L15;60S ribosomal protein L15	RPL15	tr|E7EX53|E7EX53_HUMAN Ribosomal protein L15 (Fragment) OS=Homo sapiens OX=9606 GN=RPL15 PE=1 SV=1;tr|A0A2R8Y738|A0A2R8Y738_HUMAN Ribosomal protein L15 (Fragment) OS=Homo sapiens OX=9606 GN=RPL15 PE=1 SV=1;tr|A0A2R8YEM3|A0A2R8YEM3_HUMAN Ribosomal protein L	6	0	0	0	0	0	0	0	0	1	0	12.456	4314000	0	0	0	0	0	0	0	0	1001200	0
Q9BR76	Coronin-1B	CORO1B	sp|Q9BR76|COR1B_HUMAN Coronin-1B OS=Homo sapiens OX=9606 GN=CORO1B PE=1 SV=1	1	0	0	0	0	0	0	0	0	1	0	12.447	2673600	0	0	0	0	0	0	0	0	2673600	0
Q9NP55	BPI fold-containing family A member 1	BPIFA1	sp|Q9NP55|BPIA1_HUMAN BPI fold-containing family A member 1 OS=Homo sapiens OX=9606 GN=BPIFA1 PE=1 SV=1	1	0	0	0	0	0	0	1	0	0	1	12.377	14969000	0	0	0	0	0	0	2076000	0	0	10117000
P62191	26S protease regulatory subunit 4	PSMC1	sp|P62191|PRS4_HUMAN 26S proteasome regulatory subunit 4 OS=Homo sapiens OX=9606 GN=PSMC1 PE=1 SV=1	1	1	2	0	0	1	0	0	0	0	0	12.334	13158000	1431600	4350800	0	0	2733000	0	0	0	0	0
E7ER27;A0A2R8Y7L2;G5E9S2;E7ET17;A0A2R8YD50;E7EWE5;P51659;A0A2R8Y7W2;E7EPL9	Peroxisomal multifunctional enzyme type 2;(3R)-hydroxyacyl-CoA dehydrogenase;Enoyl-CoA hydratase 2	HSD17B4	tr|E7ER27|E7ER27_HUMAN Peroxisomal multifunctional enzyme type 2 OS=Homo sapiens OX=9606 GN=HSD17B4 PE=1 SV=3;tr|A0A2R8Y7L2|A0A2R8Y7L2_HUMAN Peroxisomal multifunctional enzyme type 2 OS=Homo sapiens OX=9606 GN=HSD17B4 PE=1 SV=1;tr|G5E9S2|G5E9S2_HUMAN Hydro	9	2	1	0	1	0	0	0	0	0	0	12.247	8182800	3693300	1820000	0	1412700	0	0	0	0	0	0
O14776;G3V220	Transcription elongation regulator 1	TCERG1	sp|O14776|TCRG1_HUMAN Transcription elongation regulator 1 OS=Homo sapiens OX=9606 GN=TCERG1 PE=1 SV=2;tr|G3V220|G3V220_HUMAN Transcription elongation regulator 1 OS=Homo sapiens OX=9606 GN=TCERG1 PE=1 SV=1	2	1	0	1	0	1	0	1	0	0	1	12.225	13317000	883370	0	2018300	0	2845300	0	2578200	0	0	2794600
H0Y9Q1;P28838	Cytosol aminopeptidase	LAP3	tr|H0Y9Q1|H0Y9Q1_HUMAN Cytosol aminopeptidase (Fragment) OS=Homo sapiens OX=9606 GN=LAP3 PE=1 SV=8;sp|P28838|AMPL_HUMAN Cytosol aminopeptidase OS=Homo sapiens OX=9606 GN=LAP3 PE=1 SV=3	2	0	0	0	0	0	0	0	0	0	1	12.213	16846000	0	0	0	0	0	0	0	0	0	7193000
P05198;G3V4T5;H0YJS4	Eukaryotic translation initiation factor 2 subunit 1	EIF2S1	sp|P05198|IF2A_HUMAN Eukaryotic translation initiation factor 2 subunit 1 OS=Homo sapiens OX=9606 GN=EIF2S1 PE=1 SV=3;tr|G3V4T5|G3V4T5_HUMAN Eukaryotic translation initiation factor 2 subunit 1 (Fragment) OS=Homo sapiens OX=9606 GN=EIF2S1 PE=1 SV=1;tr|H0YJ	3	1	1	1	0	0	0	0	0	0	0	12.188	4550600	2429900	2120700	0	0	0	0	0	0	0	0
P54136	Arginine--tRNA ligase, cytoplasmic	RARS	sp|P54136|SYRC_HUMAN Arginine--tRNA ligase, cytoplasmic OS=Homo sapiens OX=9606 GN=RARS1 PE=1 SV=2	1	1	2	1	1	1	1	1	1	1	1	12.176	32080000	5441800	4191700	3894800	3372500	2982100	1915200	3152600	1576900	2266200	1359100
A0A087WVV1;P49721	Proteasome subunit beta type-2	PSMB2	tr|A0A087WVV1|A0A087WVV1_HUMAN Proteasome subunit beta type-2 OS=Homo sapiens OX=9606 GN=PSMB2 PE=1 SV=1;sp|P49721|PSB2_HUMAN Proteasome subunit beta type-2 OS=Homo sapiens OX=9606 GN=PSMB2 PE=1 SV=1	2	1	0	1	1	1	1	0	1	2	1	12.173	25399000	1457900	0	4580600	1914500	5181400	1727300	0	0	4797400	2461500
A0A1B0GWA2;A0A2R8YEL0;O00116	Alkyldihydroxyacetonephosphate synthase, peroxisomal	AGPS	tr|A0A1B0GWA2|A0A1B0GWA2_HUMAN Alkylglycerone-phosphate synthase (Fragment) OS=Homo sapiens OX=9606 GN=AGPS PE=1 SV=1;tr|A0A2R8YEL0|A0A2R8YEL0_HUMAN Alkylglycerone-phosphate synthase (Fragment) OS=Homo sapiens OX=9606 GN=AGPS PE=1 SV=1;sp|O00116|ADAS_HUMAN	3	0	0	0	0	0	0	0	0	0	0	12.121	4144500	0	0	0	0	0	0	0	0	0	0
Q5JTH9	RRP12-like protein	RRP12	sp|Q5JTH9|RRP12_HUMAN RRP12-like protein OS=Homo sapiens OX=9606 GN=RRP12 PE=1 SV=2	1	0	0	2	0	2	1	0	0	1	0	12.087	17550000	0	0	3809100	0	11804000	0	0	0	818830	0
Q8TDN6	Ribosome biogenesis protein BRX1 homolog	BRIX1	sp|Q8TDN6|BRX1_HUMAN Ribosome biogenesis protein BRX1 homolog OS=Homo sapiens OX=9606 GN=BRIX1 PE=1 SV=2	1	0	0	0	0	1	0	0	0	0	1	12.073	22705000	0	0	0	0	15057000	0	0	0	0	1492700
Q9BQ39;A0A087WVC1	ATP-dependent RNA helicase DDX50	DDX50	sp|Q9BQ39|DDX50_HUMAN ATP-dependent RNA helicase DDX50 OS=Homo sapiens OX=9606 GN=DDX50 PE=1 SV=1;tr|A0A087WVC1|A0A087WVC1_HUMAN ATP-dependent RNA helicase DDX50 OS=Homo sapiens OX=9606 GN=DDX50 PE=1 SV=1	2	0	1	1	1	2	1	0	0	1	0	12.059	27796000	0	2899600	4508000	3807800	7397900	2735900	0	0	2948900	0
CON__Q14525;CON__Q9UE12;CON__Q15323;Q14525;Q15323;CON__O76011;CON__Q6NTB9;CON__O76009;CON__Q8IUT8;A0A140TA69;A0A140TA62;O76009;O76011	Keratin, type I cuticular Ha3-II;Keratin, type I cuticular Ha1;Keratin, type I cuticular Ha3-I;Keratin, type I cuticular Ha4	KRT33B;KRT31;KRT33A;KRT34	;;;sp|Q14525|KT33B_HUMAN Keratin, type I cuticular Ha3-II OS=Homo sapiens OX=9606 GN=KRT33B PE=1 SV=3;sp|Q15323|K1H1_HUMAN Keratin, type I cuticular Ha1 OS=Homo sapiens OX=9606 GN=KRT31 PE=1 SV=3;;;;;tr|A0A140TA69|A0A140TA69_HUMAN Keratin, type I cuticular	13	0	0	0	0	2	0	0	0	0	0	11.998	5522800	0	0	0	0	5522800	0	0	0	0	0
CON__Q3SZH5				1	0	0	0	0	0	0	0	0	0	1	11.968	8778900	0	0	0	0	0	0	0	0	0	2977300
Q9Y265;H7C4I3;H7C4G5;E7ETR0	RuvB-like 1	RUVBL1	sp|Q9Y265|RUVB1_HUMAN RuvB-like 1 OS=Homo sapiens OX=9606 GN=RUVBL1 PE=1 SV=1;tr|H7C4I3|H7C4I3_HUMAN RuvB-like helicase (Fragment) OS=Homo sapiens OX=9606 GN=RUVBL1 PE=1 SV=1;tr|H7C4G5|H7C4G5_HUMAN RuvB-like helicase (Fragment) OS=Homo sapiens OX=9606 GN=R	4	0	0	0	0	1	1	0	0	0	0	11.832	1510600	0	0	0	0	0	788180	0	0	0	0
P28066	Proteasome subunit alpha type-5	PSMA5	sp|P28066|PSA5_HUMAN Proteasome subunit alpha type-5 OS=Homo sapiens OX=9606 GN=PSMA5 PE=1 SV=3	1	1	1	1	0	1	1	0	0	0	1	11.83	17845000	2192400	1613600	3241100	0	3751500	2070200	0	0	0	2275800
CON__ENSEMBL:ENSBTAP00000037665				1	0	0	0	0	0	0	0	0	0	1	11.802	2043300	0	0	0	0	0	0	0	0	0	759060
F5H5J4;F5H6W8;F5GXH2;F5GYU2;F5GXY2;P00338	L-lactate dehydrogenase A chain	LDHA	tr|F5H5J4|F5H5J4_HUMAN L-lactate dehydrogenase A chain OS=Homo sapiens OX=9606 GN=LDHA PE=1 SV=1;tr|F5H6W8|F5H6W8_HUMAN L-lactate dehydrogenase A chain OS=Homo sapiens OX=9606 GN=LDHA PE=1 SV=1;tr|F5GXH2|F5GXH2_HUMAN L-lactate dehydrogenase A chain (Fragme	6	0	0	0	0	0	0	0	0	0	0	11.769	5724800	0	0	0	0	0	0	0	0	0	0
F5GY32;F5H1S9;G8JLB3;Q9Y606;F5H168;F8W9U5;F5H1B2;F5GXL3	tRNA pseudouridine synthase;tRNA pseudouridine synthase A, mitochondrial	PUS1	tr|F5GY32|F5GY32_HUMAN tRNA pseudouridine synthase A (Fragment) OS=Homo sapiens OX=9606 GN=PUS1 PE=1 SV=2;tr|F5H1S9|F5H1S9_HUMAN tRNA pseudouridine synthase A OS=Homo sapiens OX=9606 GN=PUS1 PE=1 SV=1;tr|G8JLB3|G8JLB3_HUMAN tRNA pseudouridine synthase A (F	8	1	0	1	1	0	0	0	0	0	0	11.652	4149800	880860	0	0	959350	0	0	0	0	0	0
E9PL19;E9PMU7;E9PN18;A0A0J9YVR6;E9PQ56;A0A0J9YWM1;H0YEM1;A0A0J9YYL3;A0A0J9YXJ8;A0A0J9YVP6;A0A0J9YXX5;Q9UHX1	Poly(U)-binding-splicing factor PUF60	PUF60	tr|E9PL19|E9PL19_HUMAN Poly(U)-binding-splicing factor PUF60 (Fragment) OS=Homo sapiens OX=9606 GN=PUF60 PE=1 SV=1;tr|E9PMU7|E9PMU7_HUMAN Poly(U)-binding-splicing factor PUF60 (Fragment) OS=Homo sapiens OX=9606 GN=PUF60 PE=1 SV=1;tr|E9PN18|E9PN18_HUMAN Pol	12	1	0	1	1	0	1	1	1	1	0	11.647	15589000	2886300	0	1917800	4082500	0	1560800	1105900	2096500	1939000	0
CON__Q2UVX4				1	0	0	0	0	0	0	0	0	0	0	11.613	1952200	0	0	0	0	0	0	0	0	0	0
P23526	Adenosylhomocysteinase	AHCY	sp|P23526|SAHH_HUMAN Adenosylhomocysteinase OS=Homo sapiens OX=9606 GN=AHCY PE=1 SV=4	1	0	0	0	0	0	0	0	0	0	0	11.489	3552900	0	0	0	0	0	0	0	0	0	0
O75342;A0A3B3IRK2	Arachidonate 12-lipoxygenase, 12R-type	ALOX12B	sp|O75342|LX12B_HUMAN Arachidonate 12-lipoxygenase, 12R-type OS=Homo sapiens OX=9606 GN=ALOX12B PE=1 SV=1;tr|A0A3B3IRK2|A0A3B3IRK2_HUMAN Arachidonate 12-lipoxygenase, 12R-type (Fragment) OS=Homo sapiens OX=9606 GN=ALOX12B PE=1 SV=1	2	0	0	1	0	1	0	0	0	0	0	11.48	5132000	0	0	2257100	0	1797200	0	0	0	0	0
P22102	Trifunctional purine biosynthetic protein adenosine-3;Phosphoribosylamine--glycine ligase;Phosphoribosylformylglycinamidine cyclo-ligase;Phosphoribosylglycinamide formyltransferase	GART	sp|P22102|PUR2_HUMAN Trifunctional purine biosynthetic protein adenosine-3 OS=Homo sapiens OX=9606 GN=GART PE=1 SV=1	1	1	0	1	0	0	0	0	0	0	0	11.467	1977600	658420	0	0	0	0	0	0	0	0	0
P11908;B7ZB02;A6NMS2;H7C540;D3YTJ7;B1ALA9;A0A0B4J207;A0A2R8Y7H4;P60891;P21108	Ribose-phosphate pyrophosphokinase 2;Ribose-phosphate pyrophosphokinase 1;Ribose-phosphate pyrophosphokinase 3	PRPS2;PRPS1;PRPS1L1	sp|P11908|PRPS2_HUMAN Ribose-phosphate pyrophosphokinase 2 OS=Homo sapiens OX=9606 GN=PRPS2 PE=1 SV=2;tr|B7ZB02|B7ZB02_HUMAN Ribose-phosphate pyrophosphokinase 1 OS=Homo sapiens OX=9606 GN=PRPS1 PE=1 SV=1;tr|A6NMS2|A6NMS2_HUMAN Ribose-phosphate pyrophospho	10	1	0	1	0	0	0	0	0	0	0	11.395	2276100	950290	0	1066000	0	0	0	0	0	0	0
H7C1S2;P31939	Bifunctional purine biosynthesis protein PURH;Phosphoribosylaminoimidazolecarboxamide formyltransferase;IMP cyclohydrolase	ATIC	tr|H7C1S2|H7C1S2_HUMAN Bifunctional purine biosynthesis protein PURH (Fragment) OS=Homo sapiens OX=9606 GN=ATIC PE=1 SV=1;sp|P31939|PUR9_HUMAN Bifunctional purine biosynthesis protein ATIC OS=Homo sapiens OX=9606 GN=ATIC PE=1 SV=3	2	0	2	0	0	0	0	0	0	0	0	11.305	3066300	0	3066300	0	0	0	0	0	0	0	0
K7EL68;Q16543	Hsp90 co-chaperone Cdc37;Hsp90 co-chaperone Cdc37, N-terminally processed	CDC37	tr|K7EL68|K7EL68_HUMAN Hsp90 co-chaperone Cdc37 (Fragment) OS=Homo sapiens OX=9606 GN=CDC37 PE=1 SV=1;sp|Q16543|CDC37_HUMAN Hsp90 co-chaperone Cdc37 OS=Homo sapiens OX=9606 GN=CDC37 PE=1 SV=1	2	0	0	0	0	0	0	0	0	0	0	11.255	3381300	0	0	0	0	0	0	0	0	0	0
Q9HCM4	Band 4.1-like protein 5	EPB41L5	sp|Q9HCM4|E41L5_HUMAN Band 4.1-like protein 5 OS=Homo sapiens OX=9606 GN=EPB41L5 PE=1 SV=3	1	0	0	0	0	0	2	0	0	1	0	11.242	7087700	0	0	0	0	0	4391900	0	0	2695800	0
A0A1B0GVU9;P47897;A0A1B0GTT3;A0A0U1RQM8;A0A0U1RRI9;A0A0U1RQE9;A0A0U1RQQ5;C9J165;A0A0U1RQT0;B4DDN1	Glutamine--tRNA ligase	QARS	tr|A0A1B0GVU9|A0A1B0GVU9_HUMAN Glutamine--tRNA ligase (Fragment) OS=Homo sapiens OX=9606 GN=QARS1 PE=1 SV=1;sp|P47897|SYQ_HUMAN Glutamine--tRNA ligase OS=Homo sapiens OX=9606 GN=QARS1 PE=1 SV=1;tr|A0A1B0GTT3|A0A1B0GTT3_HUMAN Glutamine--tRNA ligase (Fragmen	10	2	0	0	1	0	0	0	0	1	0	11.193	6146900	3559100	0	0	856290	0	0	0	0	689000	0
E5RHJ4;Q8N163;G3V119;H0YB24	Cell cycle and apoptosis regulator protein 2	CCAR2	tr|E5RHJ4|E5RHJ4_HUMAN Cell cycle and apoptosis regulator protein 2 (Fragment) OS=Homo sapiens OX=9606 GN=CCAR2 PE=1 SV=1;sp|Q8N163|CCAR2_HUMAN Cell cycle and apoptosis regulator protein 2 OS=Homo sapiens OX=9606 GN=CCAR2 PE=1 SV=2;tr|G3V119|G3V119_HUMAN C	4	1	0	1	0	0	0	0	0	0	0	11.19	3143400	590530	0	1490200	0	0	0	0	0	0	0
Q8WU90	Zinc finger CCCH domain-containing protein 15	ZC3H15	sp|Q8WU90|ZC3HF_HUMAN Zinc finger CCCH domain-containing protein 15 OS=Homo sapiens OX=9606 GN=ZC3H15 PE=1 SV=1	1	0	1	1	0	0	0	0	0	1	0	11.129	2986600	0	751010	747250	0	0	0	0	0	1488400	0
A0A140T9Y7;Q08J23	tRNA (cytosine(34)-C(5))-methyltransferase	NSUN2	tr|A0A140T9Y7|A0A140T9Y7_HUMAN RNA cytosine C(5)-methyltransferase NSUN2 OS=Homo sapiens OX=9606 GN=NSUN2 PE=1 SV=1;sp|Q08J23|NSUN2_HUMAN RNA cytosine C(5)-methyltransferase NSUN2 OS=Homo sapiens OX=9606 GN=NSUN2 PE=1 SV=2	2	0	0	1	0	0	0	0	0	0	0	11.071	2978300	0	0	2549000	0	0	0	0	0	0	0
Q96QE3;A0A075B754	ATPase family AAA domain-containing protein 5	ATAD5	sp|Q96QE3|ATAD5_HUMAN ATPase family AAA domain-containing protein 5 OS=Homo sapiens OX=9606 GN=ATAD5 PE=1 SV=4;tr|A0A075B754|A0A075B754_HUMAN ATPase family AAA domain-containing protein 5 OS=Homo sapiens OX=9606 GN=ATAD5 PE=1 SV=1	2	0	2	1	0	0	1	0	0	0	0	11.033	31906000	0	30270000	0	0	0	1636600	0	0	0	0
F8VUA6;F8VYV2;A0A075B7A0;G3V203;H0YHA7;J3QQ67;Q07020	60S ribosomal protein L18	RPL18	tr|F8VUA6|F8VUA6_HUMAN 60S ribosomal protein L18 (Fragment) OS=Homo sapiens OX=9606 GN=RPL18 PE=1 SV=1;tr|F8VYV2|F8VYV2_HUMAN 60S ribosomal protein L18 OS=Homo sapiens OX=9606 GN=RPL18 PE=1 SV=1;tr|A0A075B7A0|A0A075B7A0_HUMAN 60S ribosomal protein L18 OS=H	7	0	0	0	0	0	0	0	0	0	0	11.004	936250	0	0	0	0	0	0	0	0	0	0
P63244;D6RHH4;J3KPE3;D6RAU2;E9PD14;D6RFZ9;D6R9L0;H0Y8W2;D6RAC2;H0YAM7;D6R9Z1;D6RDI0;D6RGK8;D6RFX4;D6RBD0;D6R909;D6RHJ5;D6REE5;H0YAF8	Guanine nucleotide-binding protein subunit beta-2-like 1;Guanine nucleotide-binding protein subunit beta-2-like 1, N-terminally processed	GNB2L1	sp|P63244|RACK1_HUMAN Receptor of activated protein C kinase 1 OS=Homo sapiens OX=9606 GN=RACK1 PE=1 SV=3;tr|D6RHH4|D6RHH4_HUMAN Receptor of-activated protein C kinase 1 OS=Homo sapiens OX=9606 GN=RACK1 PE=1 SV=1;tr|J3KPE3|J3KPE3_HUMAN Receptor of-activate	19	0	0	0	0	0	0	0	0	0	0	10.872	1644900	0	0	0	0	0	0	0	0	0	0
H0Y9C7;P20933	N(4)-(beta-N-acetylglucosaminyl)-L-asparaginase;Glycosylasparaginase alpha chain;Glycosylasparaginase beta chain	AGA	tr|H0Y9C7|H0Y9C7_HUMAN N(4)-(beta-N-acetylglucosaminyl)-L-asparaginase (Fragment) OS=Homo sapiens OX=9606 GN=AGA PE=1 SV=8;sp|P20933|ASPG_HUMAN N(4)-(beta-N-acetylglucosaminyl)-L-asparaginase OS=Homo sapiens OX=9606 GN=AGA PE=1 SV=2	2	0	0	1	0	0	0	0	0	0	0	10.022	2079100	0	0	2079100	0	0	0	0	0	0	0
F8VRU1;F8VYE9;F8VSC7;F8VP89;F8VX11;E7EX17;P23588	Eukaryotic translation initiation factor 4B	EIF4B	tr|F8VRU1|F8VRU1_HUMAN Eukaryotic translation initiation factor 4B OS=Homo sapiens OX=9606 GN=EIF4B PE=1 SV=1;tr|F8VYE9|F8VYE9_HUMAN Eukaryotic translation initiation factor 4B OS=Homo sapiens OX=9606 GN=EIF4B PE=1 SV=1;tr|F8VSC7|F8VSC7_HUMAN Eukaryotic tr	7	0	0	0	0	0	0	0	0	0	0	9.8202	2212700	0	0	0	0	0	0	0	0	0	0
K7ENW7;P26358	DNA (cytosine-5)-methyltransferase 1	DNMT1	tr|K7ENW7|K7ENW7_HUMAN DNA (cytosine-5)-methyltransferase 1 (Fragment) OS=Homo sapiens OX=9606 GN=DNMT1 PE=1 SV=1;sp|P26358|DNMT1_HUMAN DNA (cytosine-5)-methyltransferase 1 OS=Homo sapiens OX=9606 GN=DNMT1 PE=1 SV=2	2	1	1	1	0	1	0	1	0	0	0	9.7557	19066000	3150600	0	2766800	0	6056500	0	3311100	0	0	0
Q9UBG3	Cornulin	CRNN	sp|Q9UBG3|CRNN_HUMAN Cornulin OS=Homo sapiens OX=9606 GN=CRNN PE=1 SV=1	1	0	0	0	0	0	0	0	0	0	1	9.7067	11695000	0	0	0	0	0	0	0	0	0	6486600
A0A0C4DFS8;P43490	Nicotinamide phosphoribosyltransferase	NAMPT	tr|A0A0C4DFS8|A0A0C4DFS8_HUMAN Nicotinamide phosphoribosyltransferase OS=Homo sapiens OX=9606 GN=NAMPT PE=1 SV=1;sp|P43490|NAMPT_HUMAN Nicotinamide phosphoribosyltransferase OS=Homo sapiens OX=9606 GN=NAMPT PE=1 SV=1	2	0	0	0	0	0	0	0	0	0	1	9.6484	1189600	0	0	0	0	0	0	0	0	0	0
P40227	T-complex protein 1 subunit zeta	CCT6A	sp|P40227|TCPZ_HUMAN T-complex protein 1 subunit zeta OS=Homo sapiens OX=9606 GN=CCT6A PE=1 SV=3	1	0	0	0	0	0	0	0	0	0	0	9.6168	0	0	0	0	0	0	0	0	0	0	0
F5GY55;Q16531	DNA damage-binding protein 1	DDB1	tr|F5GY55|F5GY55_HUMAN DNA damage-binding protein 1 OS=Homo sapiens OX=9606 GN=DDB1 PE=1 SV=1;sp|Q16531|DDB1_HUMAN DNA damage-binding protein 1 OS=Homo sapiens OX=9606 GN=DDB1 PE=1 SV=1	2	0	0	0	0	0	0	0	0	0	0	9.6005	539900	0	0	0	0	0	0	0	0	0	0
Q6PCB5	Round spermatid basic protein 1-like protein	RSBN1L	sp|Q6PCB5|RSBNL_HUMAN Lysine-specific demethylase RSBN1L OS=Homo sapiens OX=9606 GN=RSBN1L PE=1 SV=2	1	1	1	1	1	1	1	1	1	1	1	9.5826	73704000	6413500	5973000	6415300	6642300	9945300	7846200	7116400	3387500	5149100	5879500
F8WD96;C9JH19;H7C469;A0A1B0GW44;A0A1B0GVP3;A0A1B0GV23;A0A1B0GVD5;A0A1B0GWE8;A0A1B0GU92;A0A1B0GU03;P07339	Cathepsin D;Cathepsin D light chain;Cathepsin D heavy chain	CTSD	tr|F8WD96|F8WD96_HUMAN Cathepsin D OS=Homo sapiens OX=9606 GN=CTSD PE=1 SV=1;tr|C9JH19|C9JH19_HUMAN Cathepsin D (Fragment) OS=Homo sapiens OX=9606 GN=CTSD PE=1 SV=1;tr|H7C469|H7C469_HUMAN Peptidase A1 domain-containing protein (Fragment) OS=Homo sapiens OX	11	0	0	1	1	0	1	0	0	0	1	9.5111	15413000	0	0	5646900	4095100	0	2913300	0	0	0	2757700
K7ENY4;P51148	Ras-related protein Rab-5C	RAB5C	tr|K7ENY4|K7ENY4_HUMAN Ras-related protein Rab-5C (Fragment) OS=Homo sapiens OX=9606 GN=RAB5C PE=1 SV=1;sp|P51148|RAB5C_HUMAN Ras-related protein Rab-5C OS=Homo sapiens OX=9606 GN=RAB5C PE=1 SV=2	2	0	0	0	0	0	0	0	0	0	0	9.3655	4056800	0	0	0	0	0	0	0	0	0	0
A0A0B4J2C3;Q5W0H4;P13693	Translationally-controlled tumor protein	TPT1	tr|A0A0B4J2C3|A0A0B4J2C3_HUMAN Translationally-controlled tumor protein OS=Homo sapiens OX=9606 GN=TPT1 PE=1 SV=1;tr|Q5W0H4|Q5W0H4_HUMAN Translationally-controlled tumor protein OS=Homo sapiens OX=9606 GN=TPT1 PE=1 SV=1;sp|P13693|TCTP_HUMAN Translationally	3	1	0	0	0	0	0	0	0	0	0	9.3417	686660	686660	0	0	0	0	0	0	0	0	0
K7EJD0;O60664	Perilipin-3	PLIN3	tr|K7EJD0|K7EJD0_HUMAN Perilipin-3 (Fragment) OS=Homo sapiens OX=9606 GN=PLIN3 PE=1 SV=1;sp|O60664|PLIN3_HUMAN Perilipin-3 OS=Homo sapiens OX=9606 GN=PLIN3 PE=1 SV=3	2	0	0	0	0	0	0	0	0	0	0	9.3379	668060	0	0	0	0	0	0	0	0	0	0
I3L3H2;P38919	Eukaryotic initiation factor 4A-III;Eukaryotic initiation factor 4A-III, N-terminally processed	EIF4A3	tr|I3L3H2|I3L3H2_HUMAN Eukaryotic initiation factor 4A-III OS=Homo sapiens OX=9606 GN=EIF4A3 PE=1 SV=2;sp|P38919|IF4A3_HUMAN Eukaryotic initiation factor 4A-III OS=Homo sapiens OX=9606 GN=EIF4A3 PE=1 SV=4	2	1	0	1	0	1	1	1	0	0	0	9.2405	11758000	1917000	0	2789900	0	3312100	1555000	2183600	0	0	0
H7C2W9;C9JU56;B7Z4E3;B7Z4C8;P62899	60S ribosomal protein L31	RPL31	tr|H7C2W9|H7C2W9_HUMAN 60S ribosomal protein L31 (Fragment) OS=Homo sapiens OX=9606 GN=RPL31 PE=1 SV=1;tr|C9JU56|C9JU56_HUMAN 60S ribosomal protein L31 (Fragment) OS=Homo sapiens OX=9606 GN=RPL31 PE=1 SV=1;tr|B7Z4E3|B7Z4E3_HUMAN 60S ribosomal protein L31 O	5	1	1	1	1	1	1	1	0	1	1	9.0578	57956000	5908100	2268000	4092800	2550700	9600300	4114100	4290400	0	2027600	5905200
Q5T3N0;Q5T3N1;P04083	Annexin;Annexin A1	ANXA1	tr|Q5T3N0|Q5T3N0_HUMAN Annexin (Fragment) OS=Homo sapiens OX=9606 GN=ANXA1 PE=1 SV=1;tr|Q5T3N1|Q5T3N1_HUMAN Annexin (Fragment) OS=Homo sapiens OX=9606 GN=ANXA1 PE=1 SV=1;sp|P04083|ANXA1_HUMAN Annexin A1 OS=Homo sapiens OX=9606 GN=ANXA1 PE=1 SV=2	3	0	0	0	0	0	0	0	0	0	1	9.0425	3836600	0	0	0	0	0	0	0	0	0	3836600
F2Z2C0;Q9Y2L1	Exosome complex exonuclease RRP44	DIS3	tr|F2Z2C0|F2Z2C0_HUMAN Exosome complex exonuclease RRP44 OS=Homo sapiens OX=9606 GN=DIS3 PE=1 SV=1;sp|Q9Y2L1|RRP44_HUMAN Exosome complex exonuclease RRP44 OS=Homo sapiens OX=9606 GN=DIS3 PE=1 SV=2	2	0	0	1	1	0	0	0	0	1	0	9.0265	5035200	0	0	3608700	1426500	0	0	0	0	0	0
Q14676	Mediator of DNA damage checkpoint protein 1	MDC1	sp|Q14676|MDC1_HUMAN Mediator of DNA damage checkpoint protein 1 OS=Homo sapiens OX=9606 GN=MDC1 PE=1 SV=3	1	0	0	1	0	1	0	0	0	0	0	8.9313	6828800	0	0	1698200	0	2573500	0	0	0	0	0
O00232	26S proteasome non-ATPase regulatory subunit 12	PSMD12	sp|O00232|PSD12_HUMAN 26S proteasome non-ATPase regulatory subunit 12 OS=Homo sapiens OX=9606 GN=PSMD12 PE=1 SV=3	1	1	0	0	0	0	0	0	0	1	0	8.839	3406200	2087700	0	0	0	0	0	0	0	1318500	0
J3QSA9;J3QQM1;P62195	26S protease regulatory subunit 8	PSMC5	tr|J3QSA9|J3QSA9_HUMAN 26S proteasome regulatory subunit 8 (Fragment) OS=Homo sapiens OX=9606 GN=PSMC5 PE=1 SV=1;tr|J3QQM1|J3QQM1_HUMAN 26S proteasome regulatory subunit 8 (Fragment) OS=Homo sapiens OX=9606 GN=PSMC5 PE=1 SV=1;sp|P62195|PRS8_HUMAN 26S prote	3	1	1	0	1	1	0	0	0	0	0	8.7863	10169000	3229000	2759300	0	2437600	1742800	0	0	0	0	0
O95400	CD2 antigen cytoplasmic tail-binding protein 2	CD2BP2	sp|O95400|CD2B2_HUMAN CD2 antigen cytoplasmic tail-binding protein 2 OS=Homo sapiens OX=9606 GN=CD2BP2 PE=1 SV=1	1	0	0	0	0	0	0	0	0	0	0	8.7799	0	0	0	0	0	0	0	0	0	0	0
H7C3T4;A6NJJ0;Q13162	Peroxiredoxin-4	PRDX4	tr|H7C3T4|H7C3T4_HUMAN Peroxiredoxin-4 (Fragment) OS=Homo sapiens OX=9606 GN=PRDX4 PE=1 SV=1;tr|A6NJJ0|A6NJJ0_HUMAN Peroxiredoxin-4 (Fragment) OS=Homo sapiens OX=9606 GN=PRDX4 PE=1 SV=1;sp|Q13162|PRDX4_HUMAN Peroxiredoxin-4 OS=Homo sapiens OX=9606 GN=PRDX4	3	1	0	1	0	1	0	1	0	0	0	8.7537	6903600	1369600	0	2060300	0	1086200	0	2387400	0	0	0
Q86WA6	Valacyclovir hydrolase	BPHL	sp|Q86WA6|BPHL_HUMAN Valacyclovir hydrolase OS=Homo sapiens OX=9606 GN=BPHL PE=1 SV=1	1	0	0	0	0	0	0	0	0	0	1	8.7416	4011300	0	0	0	0	0	0	0	0	0	4011300
A0A0A0MR81;F5GXF5;E7ETD6;E9PE19;A0A2R8Y7Q1;Q12830	Nucleosome-remodeling factor subunit BPTF	BPTF	tr|A0A0A0MR81|A0A0A0MR81_HUMAN Nucleosome-remodeling factor subunit BPTF OS=Homo sapiens OX=9606 GN=BPTF PE=1 SV=1;tr|F5GXF5|F5GXF5_HUMAN Nucleosome-remodeling factor subunit BPTF (Fragment) OS=Homo sapiens OX=9606 GN=BPTF PE=1 SV=2;tr|E7ETD6|E7ETD6_HUMAN	6	1	1	0	0	1	0	0	0	1	0	8.7249	9635100	2109700	2533900	0	0	2571400	0	0	0	0	0
E5RFW7;E5RFH0;E5RGU4;A0A087WZK9;B3KS98;O15372	Eukaryotic translation initiation factor 3 subunit H	EIF3H	tr|E5RFW7|E5RFW7_HUMAN Eukaryotic translation initiation factor 3 subunit H (Fragment) OS=Homo sapiens OX=9606 GN=EIF3H PE=1 SV=1;tr|E5RFH0|E5RFH0_HUMAN Eukaryotic translation initiation factor 3 subunit H (Fragment) OS=Homo sapiens OX=9606 GN=EIF3H PE=1 S	6	0	0	0	0	0	0	0	1	1	0	8.724	5450500	0	0	0	0	0	0	0	2956500	0	0
Q9UMX0;Q9NRR5;Q9UHD9	Ubiquilin-1;Ubiquilin-4;Ubiquilin-2	UBQLN1;UBQLN4;UBQLN2	sp|Q9UMX0|UBQL1_HUMAN Ubiquilin-1 OS=Homo sapiens OX=9606 GN=UBQLN1 PE=1 SV=2;sp|Q9NRR5|UBQL4_HUMAN Ubiquilin-4 OS=Homo sapiens OX=9606 GN=UBQLN4 PE=1 SV=2;sp|Q9UHD9|UBQL2_HUMAN Ubiquilin-2 OS=Homo sapiens OX=9606 GN=UBQLN2 PE=1 SV=2	3	0	0	0	0	0	0	0	0	0	0	8.6738	3127700	0	0	0	0	0	0	0	0	0	0
E5RH77;A0A2R8Y811;P62263	40S ribosomal protein S14	RPS14	tr|E5RH77|E5RH77_HUMAN 40S ribosomal protein S14 OS=Homo sapiens OX=9606 GN=RPS14 PE=1 SV=1;tr|A0A2R8Y811|A0A2R8Y811_HUMAN 40S ribosomal protein S14 (Fragment) OS=Homo sapiens OX=9606 GN=RPS14 PE=1 SV=1;sp|P62263|RS14_HUMAN 40S ribosomal protein S14 OS=Hom	3	1	0	0	0	1	0	0	0	0	0	8.6434	4783000	0	0	0	0	3343000	0	0	0	0	0
A0A286YEP7;H7C0U8;Q9BXP5	Serrate RNA effector molecule homolog	SRRT	tr|A0A286YEP7|A0A286YEP7_HUMAN Serrate RNA effector molecule homolog (Fragment) OS=Homo sapiens OX=9606 GN=SRRT PE=1 SV=1;tr|H7C0U8|H7C0U8_HUMAN Serrate RNA effector molecule homolog (Fragment) OS=Homo sapiens OX=9606 GN=SRRT PE=1 SV=1;sp|Q9BXP5|SRRT_HUMAN	3	0	0	0	0	0	0	0	0	0	0	8.6411	1317900	0	0	0	0	0	0	0	0	0	0
H0YDZ7;Q5SZC3;Q5SZC6;Q9Y2T3	Guanine deaminase	GDA	tr|H0YDZ7|H0YDZ7_HUMAN Guanine deaminase (Fragment) OS=Homo sapiens OX=9606 GN=GDA PE=1 SV=1;tr|Q5SZC3|Q5SZC3_HUMAN Guanine deaminase (Fragment) OS=Homo sapiens OX=9606 GN=GDA PE=1 SV=1;tr|Q5SZC6|Q5SZC6_HUMAN Guanine deaminase OS=Homo sapiens OX=9606 GN=GD	4	0	0	0	0	0	0	0	0	0	0	8.623	4478300	0	0	0	0	0	0	0	0	0	0
D6RFH4;H3BUX2;O43169	Cytochrome b5 type B	CYB5B	tr|D6RFH4|D6RFH4_HUMAN Cytochrome b5 type B OS=Homo sapiens OX=9606 GN=CYB5B PE=1 SV=2;tr|H3BUX2|H3BUX2_HUMAN Cytochrome b5 type B OS=Homo sapiens OX=9606 GN=CYB5B PE=1 SV=2;sp|O43169|CYB5B_HUMAN Cytochrome b5 type B OS=Homo sapiens OX=9606 GN=CYB5B PE=1 S	3	1	0	0	0	0	0	0	0	0	0	8.6189	1803100	1803100	0	0	0	0	0	0	0	0	0
B1ANH5;B1ANH0;B1ANG9;B1ANH6;B1ANH2;B1ANH3;Q16774	Guanylate kinase	GUK1	tr|B1ANH5|B1ANH5_HUMAN Guanylate kinase OS=Homo sapiens OX=9606 GN=GUK1 PE=1 SV=1;tr|B1ANH0|B1ANH0_HUMAN Guanylate kinase (Fragment) OS=Homo sapiens OX=9606 GN=GUK1 PE=1 SV=1;tr|B1ANG9|B1ANG9_HUMAN Guanylate kinase OS=Homo sapiens OX=9606 GN=GUK1 PE=1 SV=2	7	0	0	0	0	0	0	0	0	0	0	8.399	6162400	0	0	0	0	0	0	0	0	0	0
E5RHF4;E5RIZ4;Q9P015	39S ribosomal protein L15, mitochondrial	MRPL15	tr|E5RHF4|E5RHF4_HUMAN 39S ribosomal protein L15, mitochondrial (Fragment) OS=Homo sapiens OX=9606 GN=MRPL15 PE=1 SV=1;tr|E5RIZ4|E5RIZ4_HUMAN 39S ribosomal protein L15, mitochondrial (Fragment) OS=Homo sapiens OX=9606 GN=MRPL15 PE=1 SV=2;sp|Q9P015|RM15_HUM	3	1	0	1	0	0	1	0	0	0	0	8.3627	10912000	1815500	0	1854700	0	0	2152300	0	0	0	0
F8WCN3;P12532	Creatine kinase U-type, mitochondrial	CKMT1B;CKMT1A	tr|F8WCN3|F8WCN3_HUMAN Creatine kinase U-type, mitochondrial OS=Homo sapiens OX=9606 GN=CKMT1A PE=1 SV=1;sp|P12532|KCRU_HUMAN Creatine kinase U-type, mitochondrial OS=Homo sapiens OX=9606 GN=CKMT1A PE=1 SV=1	2	0	1	0	0	0	0	0	0	0	0	8.3539	7236900	0	3051000	0	0	0	0	0	0	0	0
E9PNR9;E9PQ98;E9PIX6;H0YDE4;E9PKG1;Q99873	Protein arginine N-methyltransferase 1	PRMT1	tr|E9PNR9|E9PNR9_HUMAN Protein arginine N-methyltransferase 1 (Fragment) OS=Homo sapiens OX=9606 GN=PRMT1 PE=1 SV=1;tr|E9PQ98|E9PQ98_HUMAN Protein arginine N-methyltransferase 1 (Fragment) OS=Homo sapiens OX=9606 GN=PRMT1 PE=1 SV=1;tr|E9PIX6|E9PIX6_HUMAN P	6	1	1	1	1	1	1	0	0	1	1	8.2474	15008000	2519100	1259300	3830900	0	3236000	1154400	0	0	776900	2231400
P30084	Enoyl-CoA hydratase, mitochondrial	ECHS1	sp|P30084|ECHM_HUMAN Enoyl-CoA hydratase, mitochondrial OS=Homo sapiens OX=9606 GN=ECHS1 PE=1 SV=4	1	0	0	0	0	0	0	0	0	0	0	8.2154	1720100	0	0	0	0	0	0	0	0	0	0
G3V393;G3V5M2;P00491	Purine nucleoside phosphorylase	PNP	tr|G3V393|G3V393_HUMAN Purine nucleoside phosphorylase (Fragment) OS=Homo sapiens OX=9606 GN=PNP PE=1 SV=1;tr|G3V5M2|G3V5M2_HUMAN Purine nucleoside phosphorylase (Fragment) OS=Homo sapiens OX=9606 GN=PNP PE=1 SV=1;sp|P00491|PNPH_HUMAN Purine nucleoside pho	3	0	0	0	0	0	0	0	0	0	0	8.1729	1385700	0	0	0	0	0	0	0	0	0	0
Q5VVC8;P62913	60S ribosomal protein L11	RPL11	tr|Q5VVC8|Q5VVC8_HUMAN 60S ribosomal protein L11 OS=Homo sapiens OX=9606 GN=RPL11 PE=1 SV=2;sp|P62913|RL11_HUMAN 60S ribosomal protein L11 OS=Homo sapiens OX=9606 GN=RPL11 PE=1 SV=2	2	0	0	0	0	0	0	0	0	0	0	8.1587	4381900	0	0	0	0	0	0	0	0	0	0
E9PSF4;H0YEU2;E9PL09;P23396	40S ribosomal protein S3	RPS3	tr|E9PSF4|E9PSF4_HUMAN 40S ribosomal protein S3 OS=Homo sapiens OX=9606 GN=RPS3 PE=1 SV=1;tr|H0YEU2|H0YEU2_HUMAN 40S ribosomal protein S3 (Fragment) OS=Homo sapiens OX=9606 GN=RPS3 PE=1 SV=1;tr|E9PL09|E9PL09_HUMAN 40S ribosomal protein S3 OS=Homo sapiens O	4	0	1	1	1	1	0	0	0	1	0	8.1578	33760000	0	4148500	3378600	2150800	9241800	0	0	0	4099700	0
CON__REFSEQ:XP_001252647				1	0	0	0	0	0	0	0	0	0	0	8.0814	4415000	0	0	0	0	0	0	0	0	0	0
A0A494C001;A0A499FJY3;A0A087WWP4;Q96T37	Putative RNA-binding protein 15	RBM15	tr|A0A494C001|A0A494C001_HUMAN RNA-binding protein 15 OS=Homo sapiens OX=9606 GN=RBM15 PE=1 SV=2;tr|A0A499FJY3|A0A499FJY3_HUMAN RNA-binding protein 15 OS=Homo sapiens OX=9606 GN=RBM15 PE=4 SV=1;tr|A0A087WWP4|A0A087WWP4_HUMAN RNA-binding protein 15 OS=Homo	4	0	0	1	0	1	0	0	0	1	0	8.0791	12060000	0	0	1832900	0	5536600	0	0	0	1990300	0
Q86VH2	Kinesin-like protein KIF27	KIF27	sp|Q86VH2|KIF27_HUMAN Kinesin-like protein KIF27 OS=Homo sapiens OX=9606 GN=KIF27 PE=1 SV=1	1	0	0	0	0	0	0	0	0	0	1	8.0538	11100000	0	0	0	0	0	0	0	0	0	11100000
O95163	Elongator complex protein 1	IKBKAP	sp|O95163|ELP1_HUMAN Elongator complex protein 1 OS=Homo sapiens OX=9606 GN=ELP1 PE=1 SV=3	1	0	0	0	0	0	0	0	0	0	0	8.0412	670810	0	0	0	0	0	0	0	0	0	0
O15355	Protein phosphatase 1G	PPM1G	sp|O15355|PPM1G_HUMAN Protein phosphatase 1G OS=Homo sapiens OX=9606 GN=PPM1G PE=1 SV=1	1	1	1	1	1	1	0	0	0	1	1	7.9047	18991000	1518400	1559300	3319100	2018300	2354900	0	0	0	1641600	0
A0A1W2PS00;P17600	Synapsin-1	SYN1	tr|A0A1W2PS00|A0A1W2PS00_HUMAN Synapsin-1 (Fragment) OS=Homo sapiens OX=9606 GN=SYN1 PE=1 SV=1;sp|P17600|SYN1_HUMAN Synapsin-1 OS=Homo sapiens OX=9606 GN=SYN1 PE=1 SV=3	2	0	0	0	0	0	0	0	0	0	0	7.9006	2433900	0	0	0	0	0	0	0	0	0	0
P49411	Elongation factor Tu, mitochondrial	TUFM	sp|P49411|EFTU_HUMAN Elongation factor Tu, mitochondrial OS=Homo sapiens OX=9606 GN=TUFM PE=1 SV=2	1	1	0	0	0	1	0	1	0	0	1	7.8981	3260800	0	0	0	0	1119300	0	1120800	0	0	1020800
Q13509	Tubulin beta-3 chain	TUBB3	sp|Q13509|TBB3_HUMAN Tubulin beta-3 chain OS=Homo sapiens OX=9606 GN=TUBB3 PE=1 SV=2	7	0	0	0	0	0	0	0	0	0	0	7.8874	1622000	0	0	0	0	0	0	0	0	0	0
B4E3S0;Q9ULV4	Coronin;Coronin-1C	CORO1C	tr|B4E3S0|B4E3S0_HUMAN Coronin OS=Homo sapiens OX=9606 GN=CORO1C PE=1 SV=1;sp|Q9ULV4|COR1C_HUMAN Coronin-1C OS=Homo sapiens OX=9606 GN=CORO1C PE=1 SV=1	2	0	0	0	0	0	0	0	0	1	0	7.8386	5197700	0	0	0	0	0	0	0	0	5197700	0
I3L0K2;I3L3M7;I3L2R6;Q9BRA2	Thioredoxin domain-containing protein 17	TXNDC17	tr|I3L0K2|I3L0K2_HUMAN Thioredoxin domain-containing protein 17 OS=Homo sapiens OX=9606 GN=TXNDC17 PE=1 SV=1;tr|I3L3M7|I3L3M7_HUMAN Thioredoxin domain-containing protein 17 OS=Homo sapiens OX=9606 GN=TXNDC17 PE=1 SV=1;tr|I3L2R6|I3L2R6_HUMAN Thioredoxin dom	4	0	0	0	0	0	0	0	0	0	0	7.8056	1380800	0	0	0	0	0	0	0	0	0	0
E5RJN0		HGSNAT	tr|E5RJN0|E5RJN0_HUMAN Heparan-alpha-glucosaminide N-acetyltransferase OS=Homo sapiens OX=9606 GN=HGSNAT PE=1 SV=1	1	0	0	0	1	0	0	1	0	0	0	7.8023	21388000	0	0	0	9487800	0	0	11900000	0	0	0
Q5SQT6;Q15181	Inorganic pyrophosphatase	PPA1	tr|Q5SQT6|Q5SQT6_HUMAN Inorganic pyrophosphatase OS=Homo sapiens OX=9606 GN=PPA1 PE=1 SV=1;sp|Q15181|IPYR_HUMAN Inorganic pyrophosphatase OS=Homo sapiens OX=9606 GN=PPA1 PE=1 SV=2	2	0	0	0	0	0	0	0	0	0	0	7.7773	2182900	0	0	0	0	0	0	0	0	0	0
P06702	Protein S100-A9	S100A9	sp|P06702|S10A9_HUMAN Protein S100-A9 OS=Homo sapiens OX=9606 GN=S100A9 PE=1 SV=1	1	0	0	1	1	1	1	0	0	0	1	7.7532	68689000	0	0	8276400	11400000	5074500	10022000	0	0	0	20515000
H0YCG0;A0A0G2JMS7;A0A0G2JNZ2;A0A0G2JPP5;A0A669KB89;Q14160	Protein scribble homolog	SCRIB	tr|H0YCG0|H0YCG0_HUMAN Protein scribble homolog (Fragment) OS=Homo sapiens OX=9606 GN=SCRIB PE=1 SV=1;tr|A0A0G2JMS7|A0A0G2JMS7_HUMAN Protein scribble homolog OS=Homo sapiens OX=9606 GN=SCRIB PE=1 SV=1;tr|A0A0G2JNZ2|A0A0G2JNZ2_HUMAN Protein scribble homolog	6	0	1	1	1	0	0	0	0	1	0	7.7019	6497000	0	1260300	1886400	1523900	0	0	0	0	1826400	0
Q6YN16	Hydroxysteroid dehydrogenase-like protein 2	HSDL2	sp|Q6YN16|HSDL2_HUMAN Hydroxysteroid dehydrogenase-like protein 2 OS=Homo sapiens OX=9606 GN=HSDL2 PE=1 SV=1	1	0	1	0	1	0	0	0	0	0	0	7.6692	1506900	0	1506900	0	0	0	0	0	0	0	0
Q15029	116 kDa U5 small nuclear ribonucleoprotein component	EFTUD2	sp|Q15029|U5S1_HUMAN 116 kDa U5 small nuclear ribonucleoprotein component OS=Homo sapiens OX=9606 GN=EFTUD2 PE=1 SV=1	1	1	1	1	1	0	0	0	0	0	0	7.6438	8669800	1555300	2574300	0	2977900	0	0	0	0	0	0
Q5JRG1;H7BYF2;Q9BVL2	Nucleoporin p58/p45	NUPL1	tr|Q5JRG1|Q5JRG1_HUMAN Nucleoporin p58/p45 (Fragment) OS=Homo sapiens OX=9606 GN=NUP58 PE=1 SV=1;tr|H7BYF2|H7BYF2_HUMAN Nucleoporin p58/p45 (Fragment) OS=Homo sapiens OX=9606 GN=NUP58 PE=1 SV=1;sp|Q9BVL2|NUP58_HUMAN Nucleoporin p58/p45 OS=Homo sapiens OX=9	3	1	1	1	1	0	0	0	1	1	0	7.596	8045700	1801500	955760	1802900	1311600	0	0	0	1053600	1120400	0
Q9P035	Very-long-chain (3R)-3-hydroxyacyl-CoA dehydratase 3	HACD3	sp|Q9P035|HACD3_HUMAN Very-long-chain (3R)-3-hydroxyacyl-CoA dehydratase 3 OS=Homo sapiens OX=9606 GN=HACD3 PE=1 SV=2	1	1	0	0	0	0	0	0	0	0	0	7.5905	5282000	5282000	0	0	0	0	0	0	0	0	0
B8ZZQ6;P06454	Prothymosin alpha;Prothymosin alpha, N-terminally processed;Thymosin alpha-1	PTMA	tr|B8ZZQ6|B8ZZQ6_HUMAN Prothymosin alpha OS=Homo sapiens OX=9606 GN=PTMA PE=1 SV=1;sp|P06454|PTMA_HUMAN Prothymosin alpha OS=Homo sapiens OX=9606 GN=PTMA PE=1 SV=2	2	0	0	0	0	0	0	0	0	0	0	7.5745	1670600	0	0	0	0	0	0	0	0	0	0
H3BQZ7;Q1KMD3	Heterogeneous nuclear ribonucleoprotein U-like protein 2	HNRNPUL2-BSCL2;HNRNPUL2	tr|H3BQZ7|H3BQZ7_HUMAN HCG2044799 OS=Homo sapiens OX=9606 GN=HNRNPUL2-BSCL2 PE=4 SV=1;sp|Q1KMD3|HNRL2_HUMAN Heterogeneous nuclear ribonucleoprotein U-like protein 2 OS=Homo sapiens OX=9606 GN=HNRNPUL2 PE=1 SV=1	2	0	0	0	1	1	0	1	0	1	0	7.5679	6014400	0	0	0	1152100	2770800	0	2091500	0	0	0
A0A087X295;Q9NNW5	WD repeat-containing protein 6	WDR6	tr|A0A087X295|A0A087X295_HUMAN WD repeat-containing protein 6 OS=Homo sapiens OX=9606 GN=WDR6 PE=1 SV=1;sp|Q9NNW5|WDR6_HUMAN WD repeat-containing protein 6 OS=Homo sapiens OX=9606 GN=WDR6 PE=1 SV=1	2	0	1	1	1	1	1	0	0	0	0	7.5329	7822500	0	1445600	0	1891500	2924200	1561200	0	0	0	0
P62854	40S ribosomal protein S26	RPS26	sp|P62854|RS26_HUMAN 40S ribosomal protein S26 OS=Homo sapiens OX=9606 GN=RPS26 PE=1 SV=3	1	1	0	1	0	0	1	0	0	0	0	7.5312	13561000	2159800	0	2506000	0	0	2746100	0	0	0	0
I3L1E8;F6RGN5;B4DLN1;Q9UBX3	Mitochondrial dicarboxylate carrier	SLC25A10	tr|I3L1E8|I3L1E8_HUMAN Mitochondrial dicarboxylate carrier (Fragment) OS=Homo sapiens OX=9606 GN=SLC25A10 PE=3 SV=1;tr|F6RGN5|F6RGN5_HUMAN Mitochondrial dicarboxylate carrier OS=Homo sapiens OX=9606 GN=SLC25A10 PE=1 SV=1;tr|B4DLN1|B4DLN1_HUMAN cDNA FLJ6012	4	1	0	0	0	0	0	0	0	0	0	7.5166	6000200	6000200	0	0	0	0	0	0	0	0	0
H0YEB1;A0A2R8YHI4;A0A2R8Y6B8;A0A2R8Y860;H0YEK4;A0A2R8Y4W1;A0A2U3TZS7;A0A163QEF0;A0A2R8YG01;A0A2R8Y5Y1;A0A2R8Y740;A0A2R8Y862;A0A2R8Y6J5;A0A2U3U0E3;A0A2R8YFE3;A0A2R8Y642;A0A2R8Y4N0;A0A2R8YD46;P43004	Amino acid transporter;Excitatory amino acid transporter 2	SLC1A2	tr|H0YEB1|H0YEB1_HUMAN Excitatory amino acid transporter 2 (Fragment) OS=Homo sapiens OX=9606 GN=SLC1A2 PE=1 SV=1;tr|A0A2R8YHI4|A0A2R8YHI4_HUMAN Amino acid transporter (Fragment) OS=Homo sapiens OX=9606 GN=SLC1A2 PE=1 SV=1;tr|A0A2R8Y6B8|A0A2R8Y6B8_HUMAN Am	19	0	0	0	0	0	0	0	0	1	0	7.5123	8084700	0	0	0	0	0	0	0	0	8084700	0
P62266	40S ribosomal protein S23	RPS23	sp|P62266|RS23_HUMAN 40S ribosomal protein S23 OS=Homo sapiens OX=9606 GN=RPS23 PE=1 SV=3	1	0	0	0	0	1	0	1	0	0	1	7.45	41062000	0	0	0	0	9567800	0	5983100	0	0	12372000
CON__Q5D862;Q5D862	Filaggrin-2	FLG2	;sp|Q5D862|FILA2_HUMAN Filaggrin-2 OS=Homo sapiens OX=9606 GN=FLG2 PE=1 SV=1	2	1	1	1	1	1	1	1	1	1	1	7.45	353320000	5971700	4241100	35640000	24705000	46604000	25841000	39229000	18699000	18139000	39132000
Q07666	KH domain-containing, RNA-binding, signal transduction-associated protein 1	KHDRBS1	sp|Q07666|KHDR1_HUMAN KH domain-containing, RNA-binding, signal transduction-associated protein 1 OS=Homo sapiens OX=9606 GN=KHDRBS1 PE=1 SV=1	1	0	0	1	0	0	0	0	0	0	0	7.4293	0	0	0	0	0	0	0	0	0	0	0
P07814	Bifunctional glutamate/proline--tRNA ligase;Glutamate--tRNA ligase;Proline--tRNA ligase	EPRS	sp|P07814|SYEP_HUMAN Bifunctional glutamate/proline--tRNA ligase OS=Homo sapiens OX=9606 GN=EPRS1 PE=1 SV=5	1	0	1	1	1	1	0	0	0	1	0	7.3538	10058000	0	1611300	2013200	1667800	2317500	0	0	0	1340300	0
K7EMV3;K7EP01;A0A590UJJ6;B4DEB1;K7EK07;Q5TEC6;K7ES00;Q6NXT2;Q71DI3;Q16695;P84243;P68431	Histone H3;Histone H3.3C;Histone H3.2;Histone H3.1t;Histone H3.3;Histone H3.1	H3F3B;H3F3A;HIST2H3PS2;H3F3C;HIST2H3A;HIST3H3;HIST1H3A	tr|K7EMV3|K7EMV3_HUMAN Histone H3 OS=Homo sapiens OX=9606 GN=H3-3B PE=1 SV=1;tr|K7EP01|K7EP01_HUMAN Histone H3.3 OS=Homo sapiens OX=9606 GN=H3-3B PE=1 SV=1;tr|A0A590UJJ6|A0A590UJJ6_HUMAN Histone H3 OS=Homo sapiens OX=9606 GN=H3-3A PE=1 SV=1;tr|B4DEB1|B4DEB	12	0	0	0	0	0	0	0	0	0	1	7.3529	4723100	0	0	0	0	0	0	0	0	0	2127500
B4DJ81;P28331	NADH-ubiquinone oxidoreductase 75 kDa subunit, mitochondrial	NDUFS1	tr|B4DJ81|B4DJ81_HUMAN NADH-ubiquinone oxidoreductase 75 kDa subunit, mitochondrial OS=Homo sapiens OX=9606 GN=NDUFS1 PE=1 SV=1;sp|P28331|NDUS1_HUMAN NADH-ubiquinone oxidoreductase 75 kDa subunit, mitochondrial OS=Homo sapiens OX=9606 GN=NDUFS1 PE=1 SV=3	2	0	0	0	0	0	0	0	0	0	0	7.3521	3983500	0	0	0	0	0	0	0	0	0	0
E9PND5;C9JPP3;E9PNS6;Q09028	Histone-binding protein RBBP4	RBBP4	tr|E9PND5|E9PND5_HUMAN Histone-binding protein RBBP4 (Fragment) OS=Homo sapiens OX=9606 GN=RBBP4 PE=1 SV=1;tr|C9JPP3|C9JPP3_HUMAN Histone-binding protein RBBP4 (Fragment) OS=Homo sapiens OX=9606 GN=RBBP4 PE=1 SV=2;tr|E9PNS6|E9PNS6_HUMAN Histone-binding pro	4	0	0	0	0	0	0	0	0	0	0	7.2919	3695800	0	0	0	0	0	0	0	0	0	0
U3KQ84;A0A0C4DGS1;P39656	Dolichyl-diphosphooligosaccharide--protein glycosyltransferase 48 kDa subunit	DDOST	tr|U3KQ84|U3KQ84_HUMAN Dolichyl-diphosphooligosaccharide--protein glycosyltransferase 48 kDa subunit (Fragment) OS=Homo sapiens OX=9606 GN=DDOST PE=1 SV=8;tr|A0A0C4DGS1|A0A0C4DGS1_HUMAN Dolichyl-diphosphooligosaccharide--protein glycosyltransferase 48 kDa	3	0	1	0	0	0	0	0	0	0	0	7.2759	6511800	0	6511800	0	0	0	0	0	0	0	0
H3BPK7;P49588	Alanine--tRNA ligase, cytoplasmic	AARS	tr|H3BPK7|H3BPK7_HUMAN Alanine--tRNA ligase, cytoplasmic (Fragment) OS=Homo sapiens OX=9606 GN=AARS1 PE=1 SV=3;sp|P49588|SYAC_HUMAN Alanine--tRNA ligase, cytoplasmic OS=Homo sapiens OX=9606 GN=AARS1 PE=1 SV=2	2	0	0	0	0	0	0	0	0	0	0	7.2556	2062700	0	0	0	0	0	0	0	0	0	0
H0Y875;O43852	Calumenin	CALU	tr|H0Y875|H0Y875_HUMAN Calumenin (Fragment) OS=Homo sapiens OX=9606 GN=CALU PE=1 SV=1;sp|O43852|CALU_HUMAN Calumenin OS=Homo sapiens OX=9606 GN=CALU PE=1 SV=2	2	0	0	0	0	0	0	0	0	0	0	7.2547	3986300	0	0	0	0	0	0	0	0	0	0
Q9H0U4	Ras-related protein Rab-1B	RAB1B	sp|Q9H0U4|RAB1B_HUMAN Ras-related protein Rab-1B OS=Homo sapiens OX=9606 GN=RAB1B PE=1 SV=1	1	0	0	0	0	0	0	0	0	0	0	7.2383	726710	0	0	0	0	0	0	0	0	0	0
A0A024R4E5;Q00341	Vigilin	HDLBP	tr|A0A024R4E5|A0A024R4E5_HUMAN High density lipoprotein binding protein (Vigilin), isoform CRA_a OS=Homo sapiens OX=9606 GN=HDLBP PE=1 SV=1;sp|Q00341|VIGLN_HUMAN Vigilin OS=Homo sapiens OX=9606 GN=HDLBP PE=1 SV=2	2	1	0	1	0	1	0	1	0	1	0	7.2369	21235000	3885200	0	3428700	0	6148500	0	3390000	0	2193700	0
Q9Y2R4	Probable ATP-dependent RNA helicase DDX52	DDX52	sp|Q9Y2R4|DDX52_HUMAN Probable ATP-dependent RNA helicase DDX52 OS=Homo sapiens OX=9606 GN=DDX52 PE=1 SV=3	1	0	1	0	0	1	1	0	0	0	0	7.2098	16015000	0	6060700	0	0	3511500	1607600	0	0	0	0
A0A087WY32;H3BUN0;H3BSK8;Q7Z6E9	E3 ubiquitin-protein ligase RBBP6	RBBP6	tr|A0A087WY32|A0A087WY32_HUMAN E3 ubiquitin-protein ligase RBBP6 (Fragment) OS=Homo sapiens OX=9606 GN=RBBP6 PE=1 SV=1;tr|H3BUN0|H3BUN0_HUMAN E3 ubiquitin-protein ligase RBBP6 (Fragment) OS=Homo sapiens OX=9606 GN=RBBP6 PE=1 SV=1;tr|H3BSK8|H3BSK8_HUMAN E3	4	1	0	0	0	1	1	1	0	0	1	7.2056	11889000	2367100	0	0	0	4046600	0	3037700	0	0	2437400
E9PLT0;O75534	Cold shock domain-containing protein E1	CSDE1	tr|E9PLT0|E9PLT0_HUMAN Cold shock domain-containing protein E1 OS=Homo sapiens OX=9606 GN=CSDE1 PE=1 SV=1;sp|O75534|CSDE1_HUMAN Cold shock domain-containing protein E1 OS=Homo sapiens OX=9606 GN=CSDE1 PE=1 SV=2	2	0	1	0	1	0	0	0	0	0	0	7.2	6296700	0	2828300	0	3468400	0	0	0	0	0	0
Q92747	Actin-related protein 2/3 complex subunit 1A	ARPC1A	sp|Q92747|ARC1A_HUMAN Actin-related protein 2/3 complex subunit 1A OS=Homo sapiens OX=9606 GN=ARPC1A PE=2 SV=2	1	0	0	0	0	0	0	0	0	0	0	7.1719	551930	0	0	0	0	0	0	0	0	0	0
Q7Z570	Zinc finger protein 804A	ZNF804A	sp|Q7Z570|Z804A_HUMAN Zinc finger protein 804A OS=Homo sapiens OX=9606 GN=ZNF804A PE=2 SV=3	1	0	0	0	1	0	0	0	1	1	0	7.1357	108790000	0	0	0	19937000	0	0	0	26427000	19533000	0
A0A1W2PQC2;A0A1W2PRT2;A0A1W2PQV5;A0A1W2PNM1;A0A0A0MSE2;A0A0D9SFP2;E9PF18;Q16836	Hydroxyacyl-coenzyme A dehydrogenase, mitochondrial	HADH	tr|A0A1W2PQC2|A0A1W2PQC2_HUMAN Hydroxyacyl-coenzyme A dehydrogenase, mitochondrial (Fragment) OS=Homo sapiens OX=9606 GN=HADH PE=1 SV=1;tr|A0A1W2PRT2|A0A1W2PRT2_HUMAN Hydroxyacyl-coenzyme A dehydrogenase, mitochondrial (Fragment) OS=Homo sapiens OX=9606 GN	8	0	0	0	0	0	0	0	0	0	0	7.1258	0	0	0	0	0	0	0	0	0	0	0
C9K0U8;A0A0G2JLD8;E7EUY5;Q04837	Single-stranded DNA-binding protein, mitochondrial	SSBP1	tr|C9K0U8|C9K0U8_HUMAN Single-stranded DNA-binding protein, mitochondrial (Fragment) OS=Homo sapiens OX=9606 GN=SSBP1 PE=1 SV=1;tr|A0A0G2JLD8|A0A0G2JLD8_HUMAN Single-stranded DNA-binding protein, mitochondrial (Fragment) OS=Homo sapiens OX=9606 GN=SSBP1 PE	4	0	0	0	0	0	0	0	0	1	0	7.0898	0	0	0	0	0	0	0	0	0	0	0
H0YAW2		DENND3	tr|H0YAW2|H0YAW2_HUMAN DENN domain-containing protein 3 (Fragment) OS=Homo sapiens OX=9606 GN=DENND3 PE=1 SV=1	1	1	1	1	1	1	1	1	1	1	1	7.0791	369370000	14495000	22120000	16923000	33125000	33195000	68828000	14553000	31503000	27836000	16020000
A0A1W2PNX8;Q9H3U1	Protein unc-45 homolog A	UNC45A	tr|A0A1W2PNX8|A0A1W2PNX8_HUMAN Protein unc-45 homolog A OS=Homo sapiens OX=9606 GN=UNC45A PE=1 SV=1;sp|Q9H3U1|UN45A_HUMAN Protein unc-45 homolog A OS=Homo sapiens OX=9606 GN=UNC45A PE=1 SV=1	2	1	1	1	1	1	1	1	1	1	0	7.0701	26942000	3057900	3103600	3061500	3010300	3086100	1921400	0	1717100	3321600	0
CON__P02666				1	0	0	0	0	0	0	0	0	0	1	7.0479	29315000	0	0	0	0	0	0	0	0	0	6788200
H0YAL2;Q15645	Pachytene checkpoint protein 2 homolog	TRIP13	tr|H0YAL2|H0YAL2_HUMAN Pachytene checkpoint protein 2 homolog (Fragment) OS=Homo sapiens OX=9606 GN=TRIP13 PE=1 SV=1;sp|Q15645|PCH2_HUMAN Pachytene checkpoint protein 2 homolog OS=Homo sapiens OX=9606 GN=TRIP13 PE=1 SV=2	2	1	1	0	0	0	0	0	0	0	0	7.0233	6086600	2247700	3838900	0	0	0	0	0	0	0	0
Q9Y5B9	FACT complex subunit SPT16	SUPT16H	sp|Q9Y5B9|SP16H_HUMAN FACT complex subunit SPT16 OS=Homo sapiens OX=9606 GN=SUPT16H PE=1 SV=1	1	0	0	0	0	0	0	0	0	0	0	7.0222	0	0	0	0	0	0	0	0	0	0	0
E9PJL9;E9PLC6;E9PPR0;E9PQP1;E9PMX3;B4DE93;G3V0I5;P49821	NADH dehydrogenase [ubiquinone] flavoprotein 1, mitochondrial	NDUFV1	tr|E9PJL9|E9PJL9_HUMAN NADH dehydrogenase [ubiquinone] flavoprotein 1, mitochondrial (Fragment) OS=Homo sapiens OX=9606 GN=NDUFV1 PE=1 SV=8;tr|E9PLC6|E9PLC6_HUMAN NADH dehydrogenase [ubiquinone] flavoprotein 1, mitochondrial (Fragment) OS=Homo sapiens OX=9	8	0	0	0	0	0	0	0	0	0	0	7.0095	0	0	0	0	0	0	0	0	0	0	0
Q96HR8	H/ACA ribonucleoprotein complex non-core subunit NAF1	NAF1	sp|Q96HR8|NAF1_HUMAN H/ACA ribonucleoprotein complex non-core subunit NAF1 OS=Homo sapiens OX=9606 GN=NAF1 PE=1 SV=2	1	1	1	0	1	0	1	0	0	0	0	6.991	8663800	1551800	2702100	0	2514600	0	1895400	0	0	0	0
H0YH33;Q9Y3F4	Serine-threonine kinase receptor-associated protein	STRAP	tr|H0YH33|H0YH33_HUMAN Serine-threonine kinase receptor-associated protein (Fragment) OS=Homo sapiens OX=9606 GN=STRAP PE=1 SV=1;sp|Q9Y3F4|STRAP_HUMAN Serine-threonine kinase receptor-associated protein OS=Homo sapiens OX=9606 GN=STRAP PE=1 SV=1	2	0	0	0	0	0	0	0	0	0	0	6.9888	920510	0	0	0	0	0	0	0	0	0	0
F8VTR5;Q9P121	Neurotrimin	NTM	tr|F8VTR5|F8VTR5_HUMAN Neurotrimin (Fragment) OS=Homo sapiens OX=9606 GN=NTM PE=1 SV=1;sp|Q9P121|NTRI_HUMAN Neurotrimin OS=Homo sapiens OX=9606 GN=NTM PE=1 SV=1	2	0	0	0	0	0	0	0	0	0	0	6.9639	1179100	0	0	0	0	0	0	0	0	0	0
B4DT28;O43390	Heterogeneous nuclear ribonucleoprotein R	HNRNPR	tr|B4DT28|B4DT28_HUMAN Heterogeneous nuclear ribonucleoprotein R OS=Homo sapiens OX=9606 GN=HNRNPR PE=1 SV=1;sp|O43390|HNRPR_HUMAN Heterogeneous nuclear ribonucleoprotein R OS=Homo sapiens OX=9606 GN=HNRNPR PE=1 SV=1	2	0	0	1	1	1	0	0	0	1	0	6.94	27592000	0	0	5580300	4565300	11638000	0	0	0	3310600	0
P42166	Lamina-associated polypeptide 2, isoform alpha;Thymopoietin;Thymopentin	TMPO	sp|P42166|LAP2A_HUMAN Lamina-associated polypeptide 2, isoform alpha OS=Homo sapiens OX=9606 GN=TMPO PE=1 SV=2	1	0	0	0	0	0	0	0	0	0	0	6.9317	2723800	0	0	0	0	0	0	0	0	0	0
A6NFX8;Q9UKK9	ADP-sugar pyrophosphatase	NUDT5	tr|A6NFX8|A6NFX8_HUMAN ADP-sugar pyrophosphatase OS=Homo sapiens OX=9606 GN=NUDT5 PE=1 SV=1;sp|Q9UKK9|NUDT5_HUMAN ADP-sugar pyrophosphatase OS=Homo sapiens OX=9606 GN=NUDT5 PE=1 SV=1	2	0	0	0	0	0	0	0	0	0	0	6.923	2215400	0	0	0	0	0	0	0	0	0	0
F5GZS6;P08195	4F2 cell-surface antigen heavy chain	SLC3A2	tr|F5GZS6|F5GZS6_HUMAN 4F2 cell-surface antigen heavy chain OS=Homo sapiens OX=9606 GN=SLC3A2 PE=1 SV=1;sp|P08195|4F2_HUMAN 4F2 cell-surface antigen heavy chain OS=Homo sapiens OX=9606 GN=SLC3A2 PE=1 SV=3	2	0	0	0	0	0	0	0	0	0	0	6.9211	0	0	0	0	0	0	0	0	0	0	0
E9PD92;E7EM57;E7EUI8;P11413	Glucose-6-phosphate 1-dehydrogenase	G6PD	tr|E9PD92|E9PD92_HUMAN Glucose-6-phosphate 1-dehydrogenase (Fragment) OS=Homo sapiens OX=9606 GN=G6PD PE=1 SV=1;tr|E7EM57|E7EM57_HUMAN Glucose-6-phosphate 1-dehydrogenase (Fragment) OS=Homo sapiens OX=9606 GN=G6PD PE=1 SV=1;tr|E7EUI8|E7EUI8_HUMAN Glucose-6	4	0	0	0	0	0	0	0	0	0	1	6.8562	5582500	0	0	0	0	0	0	0	0	0	2014200
Q8IWV8	E3 ubiquitin-protein ligase UBR2	UBR2	sp|Q8IWV8|UBR2_HUMAN E3 ubiquitin-protein ligase UBR2 OS=Homo sapiens OX=9606 GN=UBR2 PE=1 SV=1	1	1	0	0	1	1	1	1	0	1	1	6.8507	806970000	115220000	0	0	33728000	150120000	75974000	133440000	0	96375000	27859000
Q5SV16;A0A5K1VW56;Q5T2N8;Q9NVI7;Q5T9A4	ATPase family AAA domain-containing protein 3C;ATPase family AAA domain-containing protein 3A;ATPase family AAA domain-containing protein 3B	ATAD3A;ATAD3C;ATAD3B	tr|Q5SV16|Q5SV16_HUMAN ATPase family AAA domain-containing protein 3A (Fragment) OS=Homo sapiens OX=9606 GN=ATAD3A PE=1 SV=2;tr|A0A5K1VW56|A0A5K1VW56_HUMAN ATPase family AAA domain-containing protein 3B OS=Homo sapiens OX=9606 GN=ATAD3B PE=1 SV=1;sp|Q5T2N8	5	0	0	0	0	0	0	0	0	0	0	6.8259	2211300	0	0	0	0	0	0	0	0	0	0
Q58FF8	Putative heat shock protein HSP 90-beta 2	HSP90AB2P	sp|Q58FF8|H90B2_HUMAN Putative heat shock protein HSP 90-beta 2 OS=Homo sapiens OX=9606 GN=HSP90AB2P PE=1 SV=2	1	1	1	0	1	0	0	0	0	1	0	6.8005	47770000	7129000	14063000	0	9019300	0	0	0	0	17559000	0
CON__Q9QWL7				1	0	0	0	0	0	0	0	0	0	1	6.7762	4710800	0	0	0	0	0	0	0	0	0	3225800
O75151	Lysine-specific demethylase PHF2	PHF2	sp|O75151|PHF2_HUMAN Lysine-specific demethylase PHF2 OS=Homo sapiens OX=9606 GN=PHF2 PE=1 SV=4	1	1	0	0	0	0	0	0	0	0	0	6.7584	4157600	2834300	0	0	0	0	0	0	0	0	0
P50747	Biotin--protein ligase;Biotin--[methylmalonyl-CoA-carboxytransferase] ligase;Biotin--[propionyl-CoA-carboxylase [ATP-hydrolyzing]] ligase;Biotin--[methylcrotonoyl-CoA-carboxylase] ligase;Biotin--[acetyl-CoA-carboxylase] ligase	HLCS	sp|P50747|BPL1_HUMAN Biotin--protein ligase OS=Homo sapiens OX=9606 GN=HLCS PE=1 SV=1	1	0	0	0	0	1	0	0	0	0	0	6.752	0	0	0	0	0	0	0	0	0	0	0
Q99436	Proteasome subunit beta type-7	PSMB7	sp|Q99436|PSB7_HUMAN Proteasome subunit beta type-7 OS=Homo sapiens OX=9606 GN=PSMB7 PE=1 SV=1	1	0	0	0	0	0	0	0	0	0	0	6.7496	2234500	0	0	0	0	0	0	0	0	0	0
C9JPE8;C9JYR1;H7C3P7;C9J6B1;C9JQB3;P11234;P11233	Ras-related protein Ral-B;Ras-related protein Ral-A	RALA;RALB	tr|C9JPE8|C9JPE8_HUMAN Ras-related protein Ral-A (Fragment) OS=Homo sapiens OX=9606 GN=RALA PE=1 SV=1;tr|C9JYR1|C9JYR1_HUMAN Ras-related protein Ral-B (Fragment) OS=Homo sapiens OX=9606 GN=RALB PE=1 SV=1;tr|H7C3P7|H7C3P7_HUMAN Ras-related protein Ral-A (Fr	7	0	0	0	0	0	0	0	0	0	0	6.7395	2903600	0	0	0	0	0	0	0	0	0	0
H0Y9N9		LRBA	tr|H0Y9N9|H0Y9N9_HUMAN Lipopolysaccharide-responsive and beige-like anchor protein (Fragment) OS=Homo sapiens OX=9606 GN=LRBA PE=1 SV=1	1	0	1	0	0	1	0	0	0	1	0	6.7358	0	0	0	0	0	0	0	0	0	0	0
A0A2U3TZH3;Q05639;A0A2R8Y660;A0A2R8Y488	Elongation factor 1-alpha 2	EEF1A2	tr|A0A2U3TZH3|A0A2U3TZH3_HUMAN Elongation factor 1-alpha OS=Homo sapiens OX=9606 GN=EEF1A2 PE=1 SV=1;sp|Q05639|EF1A2_HUMAN Elongation factor 1-alpha 2 OS=Homo sapiens OX=9606 GN=EEF1A2 PE=1 SV=1;tr|A0A2R8Y660|A0A2R8Y660_HUMAN Elongation factor 1-alpha 2 (F	5	1	1	1	0	0	0	0	0	0	1	6.7206	14775000	2722900	2620400	3126800	0	0	0	0	0	0	2141100
E9PBG9;C9JCL8;C9IYE8;E7ESZ6;C9J8S0;C9J6A7;C9J9T0;C9IZU8;Q96AT9	Ribulose-phosphate 3-epimerase	RPE	tr|E9PBG9|E9PBG9_HUMAN Ribulose-phosphate 3-epimerase (Fragment) OS=Homo sapiens OX=9606 GN=RPE PE=1 SV=1;tr|C9JCL8|C9JCL8_HUMAN Ribulose-phosphate 3-epimerase (Fragment) OS=Homo sapiens OX=9606 GN=RPE PE=1 SV=1;tr|C9IYE8|C9IYE8_HUMAN Ribulose-phosphate 3-	9	0	0	0	0	0	0	0	0	0	0	6.7163	1942300	0	0	0	0	0	0	0	0	0	0
D6RBA7;D6RDA6;D6RDH9;D6RJG9;Q9Y5W7	Sorting nexin-14	SNX14	tr|D6RBA7|D6RBA7_HUMAN Sorting nexin-14 (Fragment) OS=Homo sapiens OX=9606 GN=SNX14 PE=1 SV=1;tr|D6RDA6|D6RDA6_HUMAN Sorting nexin-14 (Fragment) OS=Homo sapiens OX=9606 GN=SNX14 PE=1 SV=1;tr|D6RDH9|D6RDH9_HUMAN Sorting nexin-14 OS=Homo sapiens OX=9606 GN=S	5	0	0	0	0	0	0	0	0	0	1	6.715	3966400	0	0	0	0	0	0	0	0	0	1361000
G3V0E4;O75439	Mitochondrial-processing peptidase subunit beta	PMPCB	tr|G3V0E4|G3V0E4_HUMAN Mitochondrial-processing peptidase subunit beta OS=Homo sapiens OX=9606 GN=PMPCB PE=1 SV=1;sp|O75439|MPPB_HUMAN Mitochondrial-processing peptidase subunit beta OS=Homo sapiens OX=9606 GN=PMPCB PE=1 SV=2	2	0	0	0	0	0	0	0	0	0	0	6.7131	3937800	0	0	0	0	0	0	0	0	0	0
A0A1B0GUX5;A0A1B0GU67;A0A0D9SFB1;A0A0U1RQP1;A0A0D9SFE4;Q05193	Dynamin-1	DNM1	tr|A0A1B0GUX5|A0A1B0GUX5_HUMAN Dynamin-1 OS=Homo sapiens OX=9606 GN=DNM1 PE=1 SV=1;tr|A0A1B0GU67|A0A1B0GU67_HUMAN Dynamin-1 (Fragment) OS=Homo sapiens OX=9606 GN=DNM1 PE=1 SV=1;tr|A0A0D9SFB1|A0A0D9SFB1_HUMAN Dynamin-1 OS=Homo sapiens OX=9606 GN=DNM1 PE=1 S	6	0	0	0	0	0	0	0	0	0	0	6.6867	2779600	0	0	0	0	0	0	0	0	0	0
A0A2R8YH90;A0A2R8YHD2;A0A2R8Y5V9			tr|A0A2R8YH90|A0A2R8YH90_HUMAN Tropomyosin alpha-4 chain (Fragment) OS=Homo sapiens OX=9606 GN=TPM4 PE=1 SV=1;tr|A0A2R8YHD2|A0A2R8YHD2_HUMAN Tropomyosin alpha-4 chain (Fragment) OS=Homo sapiens OX=9606 GN=TPM4 PE=1 SV=2;tr|A0A2R8Y5V9|A0A2R8Y5V9_HUMAN Tropo	3	0	0	1	1	0	0	0	0	0	0	6.6811	15283000	0	0	7407100	7876300	0	0	0	0	0	0
H3BTN5;H3BR70	Pyruvate kinase	PKM	tr|H3BTN5|H3BTN5_HUMAN Pyruvate kinase (Fragment) OS=Homo sapiens OX=9606 GN=PKM PE=1 SV=1;tr|H3BR70|H3BR70_HUMAN Pyruvate kinase OS=Homo sapiens OX=9606 GN=PKM PE=1 SV=1	2	0	0	0	0	0	0	0	0	0	0	6.67	1923900	0	0	0	0	0	0	0	0	0	0
E9PGB1;E7ESU7;D6RAX2;E7EPF8;Q13363	C-terminal-binding protein 1	CTBP1	tr|E9PGB1|E9PGB1_HUMAN C-terminal-binding protein 1 (Fragment) OS=Homo sapiens OX=9606 GN=CTBP1 PE=1 SV=1;tr|E7ESU7|E7ESU7_HUMAN C-terminal-binding protein 1 (Fragment) OS=Homo sapiens OX=9606 GN=CTBP1 PE=1 SV=1;tr|D6RAX2|D6RAX2_HUMAN C-terminal-binding pr	5	1	1	1	0	0	0	0	0	0	0	6.6641	6964300	2448000	1642700	2873600	0	0	0	0	0	0	0
A0A0C4DGT8;A0A087WWP8;Q5VWQ0	Round spermatid basic protein 1	RSBN1	tr|A0A0C4DGT8|A0A0C4DGT8_HUMAN Lysine-specific demethylase 9 OS=Homo sapiens OX=9606 GN=RSBN1 PE=1 SV=1;tr|A0A087WWP8|A0A087WWP8_HUMAN Lysine-specific demethylase 9 OS=Homo sapiens OX=9606 GN=RSBN1 PE=1 SV=1;sp|Q5VWQ0|RSBN1_HUMAN Lysine-specific demethylas	3	0	0	0	1	1	0	0	0	0	0	6.6585	11631000	0	0	0	4790200	4321000	0	0	0	0	0
I3L1U2;H3BM90;Q8WZ19	BTB/POZ domain-containing adapter for CUL3-mediated RhoA degradation protein 1	KCTD13	tr|I3L1U2|I3L1U2_HUMAN BTB/POZ domain-containing adapter for CUL3-mediated RhoA degradation protein 1 (Fragment) OS=Homo sapiens OX=9606 GN=KCTD13 PE=1 SV=1;tr|H3BM90|H3BM90_HUMAN BTB/POZ domain-containing adapter for CUL3-mediated RhoA degradation protein	3	1	0	0	0	0	0	0	0	0	0	6.6555	20874000	20874000	0	0	0	0	0	0	0	0	0
Q9NS69	Mitochondrial import receptor subunit TOM22 homolog	TOMM22	sp|Q9NS69|TOM22_HUMAN Mitochondrial import receptor subunit TOM22 homolog OS=Homo sapiens OX=9606 GN=TOMM22 PE=1 SV=3	1	1	1	1	1	1	0	1	1	1	0	6.6414	24114000	3644700	2343400	3104000	2967100	2199600	0	2546900	2615000	2578500	0
A0A0A0MSM0;Q92598	Heat shock protein 105 kDa	HSPH1	tr|A0A0A0MSM0|A0A0A0MSM0_HUMAN Heat shock protein 105 kDa OS=Homo sapiens OX=9606 GN=HSPH1 PE=1 SV=1;sp|Q92598|HS105_HUMAN Heat shock protein 105 kDa OS=Homo sapiens OX=9606 GN=HSPH1 PE=1 SV=1	2	1	1	1	1	0	1	0	0	0	0	6.641	6881300	1446200	1283400	1797000	923790	0	1431000	0	0	0	0
F8VXU5;Q9UBQ0	Vacuolar protein sorting-associated protein 29	VPS29	tr|F8VXU5|F8VXU5_HUMAN Vacuolar protein sorting-associated protein 29 OS=Homo sapiens OX=9606 GN=VPS29 PE=1 SV=1;sp|Q9UBQ0|VPS29_HUMAN Vacuolar protein sorting-associated protein 29 OS=Homo sapiens OX=9606 GN=VPS29 PE=1 SV=1	2	0	1	0	1	0	0	0	0	0	0	6.6343	5973100	0	2394600	0	1991300	0	0	0	0	0	0
F5H3Y4;Q8IY37	Probable ATP-dependent RNA helicase DHX37	DHX37	tr|F5H3Y4|F5H3Y4_HUMAN Probable ATP-dependent RNA helicase DHX37 (Fragment) OS=Homo sapiens OX=9606 GN=DHX37 PE=1 SV=2;sp|Q8IY37|DHX37_HUMAN Probable ATP-dependent RNA helicase DHX37 OS=Homo sapiens OX=9606 GN=DHX37 PE=1 SV=1	2	0	0	0	0	1	0	0	0	0	0	6.6299	2730900	0	0	0	0	2730900	0	0	0	0	0
Q14574	Desmocollin-3	DSC3	sp|Q14574|DSC3_HUMAN Desmocollin-3 OS=Homo sapiens OX=9606 GN=DSC3 PE=1 SV=3	1	0	0	0	0	0	0	0	0	0	0	6.6059	1416300	0	0	0	0	0	0	0	0	0	0
P01037	Cystatin-SN	CST1	sp|P01037|CYTN_HUMAN Cystatin-SN OS=Homo sapiens OX=9606 GN=CST1 PE=1 SV=3	1	0	0	0	0	0	0	0	0	0	1	6.6059	4482900	0	0	0	0	0	0	0	0	0	4482900
D6RF62;E9PBS1;P22234	Multifunctional protein ADE2;Phosphoribosylaminoimidazole-succinocarboxamide synthase;Phosphoribosylaminoimidazole carboxylase	PAICS	tr|D6RF62|D6RF62_HUMAN Multifunctional protein ADE2 OS=Homo sapiens OX=9606 GN=PAICS PE=1 SV=1;tr|E9PBS1|E9PBS1_HUMAN Multifunctional protein ADE2 (Fragment) OS=Homo sapiens OX=9606 GN=PAICS PE=1 SV=1;sp|P22234|PUR6_HUMAN Multifunctional protein ADE2 OS=Ho	3	1	1	1	0	0	1	0	0	0	1	6.6022	7176400	1844400	1443100	1517100	0	0	1382500	0	0	0	989380
H0YDD4;E9PEJ4;P10515	Acetyltransferase component of pyruvate dehydrogenase complex;Dihydrolipoyllysine-residue acetyltransferase component of pyruvate dehydrogenase complex, mitochondrial	DLAT	tr|H0YDD4|H0YDD4_HUMAN Acetyltransferase component of pyruvate dehydrogenase complex (Fragment) OS=Homo sapiens OX=9606 GN=DLAT PE=1 SV=1;tr|E9PEJ4|E9PEJ4_HUMAN Acetyltransferase component of pyruvate dehydrogenase complex OS=Homo sapiens OX=9606 GN=DLAT P	3	1	0	0	0	0	0	0	0	0	0	6.5611	2060600	2060600	0	0	0	0	0	0	0	0	0
I3L1L3;Q9BQG0	Myb-binding protein 1A	MYBBP1A	tr|I3L1L3|I3L1L3_HUMAN Myb-binding protein 1A (Fragment) OS=Homo sapiens OX=9606 GN=MYBBP1A PE=1 SV=1;sp|Q9BQG0|MBB1A_HUMAN Myb-binding protein 1A OS=Homo sapiens OX=9606 GN=MYBBP1A PE=1 SV=2	2	1	1	1	0	1	1	0	0	0	0	6.5519	20682000	3877500	1115100	2755900	0	10531000	2402600	0	0	0	0
CON__Q9R0H5;CON__Q3SY84;Q3SY84	Keratin, type II cytoskeletal 71	KRT71	;;sp|Q3SY84|K2C71_HUMAN Keratin, type II cytoskeletal 71 OS=Homo sapiens OX=9606 GN=KRT71 PE=1 SV=3	3	0	0	0	0	0	0	0	0	0	0	6.5496	3999300	0	0	0	0	0	0	0	0	0	0
E5RI99;P62888	60S ribosomal protein L30	RPL30	tr|E5RI99|E5RI99_HUMAN 60S ribosomal protein L30 (Fragment) OS=Homo sapiens OX=9606 GN=RPL30 PE=1 SV=1;sp|P62888|RL30_HUMAN 60S ribosomal protein L30 OS=Homo sapiens OX=9606 GN=RPL30 PE=1 SV=2	2	0	0	0	0	1	0	0	0	0	0	6.5452	1172600	0	0	0	0	1172600	0	0	0	0	0
Q9BUF5	Tubulin beta-6 chain	TUBB6	sp|Q9BUF5|TBB6_HUMAN Tubulin beta-6 chain OS=Homo sapiens OX=9606 GN=TUBB6 PE=1 SV=1	1	1	0	0	0	0	0	0	0	0	0	6.5414	3665500	3665500	0	0	0	0	0	0	0	0	0
Q8IYD1	Eukaryotic peptide chain release factor GTP-binding subunit ERF3B	GSPT2	sp|Q8IYD1|ERF3B_HUMAN Eukaryotic peptide chain release factor GTP-binding subunit ERF3B OS=Homo sapiens OX=9606 GN=GSPT2 PE=1 SV=2	1	1	1	1	0	0	0	0	0	0	0	6.5373	8965500	3569600	1380100	4015800	0	0	0	0	0	0	0
Q15365	Poly(rC)-binding protein 1	PCBP1	sp|Q15365|PCBP1_HUMAN Poly(rC)-binding protein 1 OS=Homo sapiens OX=9606 GN=PCBP1 PE=1 SV=2	1	1	0	0	0	0	0	0	0	0	1	6.5297	9758700	2423400	0	0	0	0	0	0	0	0	2525000
O75874	Isocitrate dehydrogenase [NADP] cytoplasmic	IDH1	sp|O75874|IDHC_HUMAN Isocitrate dehydrogenase [NADP] cytoplasmic OS=Homo sapiens OX=9606 GN=IDH1 PE=1 SV=2	1	0	0	0	0	0	0	0	0	0	0	6.5275	1302600	0	0	0	0	0	0	0	0	0	0
P14868	Aspartate--tRNA ligase, cytoplasmic	DARS	sp|P14868|SYDC_HUMAN Aspartate--tRNA ligase, cytoplasmic OS=Homo sapiens OX=9606 GN=DARS1 PE=1 SV=2	1	0	0	0	0	0	0	0	0	0	0	6.5249	2967500	0	0	0	0	0	0	0	0	0	0
P05976	Myosin light chain 1/3, skeletal muscle isoform	MYL1	sp|P05976|MYL1_HUMAN Myosin light chain 1/3, skeletal muscle isoform OS=Homo sapiens OX=9606 GN=MYL1 PE=1 SV=3	1	0	0	1	0	0	0	0	0	0	0	6.5103	3062100	0	0	3062100	0	0	0	0	0	0	0
F8VUG4;Q12852	Mitogen-activated protein kinase kinase kinase 12	MAP3K12	tr|F8VUG4|F8VUG4_HUMAN Mitogen-activated protein kinase kinase kinase 12 OS=Homo sapiens OX=9606 GN=MAP3K12 PE=1 SV=1;sp|Q12852|M3K12_HUMAN Mitogen-activated protein kinase kinase kinase 12 OS=Homo sapiens OX=9606 GN=MAP3K12 PE=1 SV=2	2	0	0	0	0	0	1	0	0	0	0	6.5048	0	0	0	0	0	0	0	0	0	0	0
Q8TF66	Leucine-rich repeat-containing protein 15	LRRC15	sp|Q8TF66|LRC15_HUMAN Leucine-rich repeat-containing protein 15 OS=Homo sapiens OX=9606 GN=LRRC15 PE=2 SV=2	1	0	0	0	0	1	1	0	0	0	0	6.4994	9643200	0	0	0	0	5346500	4296700	0	0	0	0
A0A1W2PPU4;Q06124	Tyrosine-protein phosphatase non-receptor type 11	PTPN11	tr|A0A1W2PPU4|A0A1W2PPU4_HUMAN Tyrosine-protein phosphatase non-receptor type 11 OS=Homo sapiens OX=9606 GN=PTPN11 PE=1 SV=1;sp|Q06124|PTN11_HUMAN Tyrosine-protein phosphatase non-receptor type 11 OS=Homo sapiens OX=9606 GN=PTPN11 PE=1 SV=3	2	0	1	0	0	0	0	0	0	1	0	6.496	3777400	0	1683000	0	0	0	0	0	0	0	0
Q9NR99	Matrix-remodeling-associated protein 5	MXRA5	sp|Q9NR99|MXRA5_HUMAN Matrix-remodeling-associated protein 5 OS=Homo sapiens OX=9606 GN=MXRA5 PE=1 SV=3	1	0	0	0	0	0	0	0	0	0	1	6.4957	2147600	0	0	0	0	0	0	0	0	0	2147600
Q5VXN0;Q9H7B2	Ribosome production factor 2 homolog	RPF2	tr|Q5VXN0|Q5VXN0_HUMAN Ribosome production factor 2 homolog (Fragment) OS=Homo sapiens OX=9606 GN=RPF2 PE=1 SV=1;sp|Q9H7B2|RPF2_HUMAN Ribosome production factor 2 homolog OS=Homo sapiens OX=9606 GN=RPF2 PE=1 SV=2	2	0	0	0	0	1	1	0	0	0	0	6.4937	9609700	0	0	0	0	4217800	2314000	0	0	0	0
D6RHH0;U3KQT3;D6RDI2;J3KPP4;O95232	Luc7-like protein 3	LUC7L3	tr|D6RHH0|D6RHH0_HUMAN Luc7-like protein 3 (Fragment) OS=Homo sapiens OX=9606 GN=LUC7L3 PE=1 SV=1;tr|U3KQT3|U3KQT3_HUMAN Luc7-like protein 3 (Fragment) OS=Homo sapiens OX=9606 GN=LUC7L3 PE=1 SV=8;tr|D6RDI2|D6RDI2_HUMAN Luc7-like protein 3 (Fragment) OS=Hom	5	1	1	1	1	1	0	0	0	0	0	6.4888	10262000	2355700	1339600	2222700	1500200	2843600	0	0	0	0	0
H0YA96;D6RAF8;H0Y8G5;Q14103	Heterogeneous nuclear ribonucleoprotein D0	HNRNPD	tr|H0YA96|H0YA96_HUMAN Heterogeneous nuclear ribonucleoprotein D0 (Fragment) OS=Homo sapiens OX=9606 GN=HNRNPD PE=1 SV=1;tr|D6RAF8|D6RAF8_HUMAN Heterogeneous nuclear ribonucleoprotein D0 (Fragment) OS=Homo sapiens OX=9606 GN=HNRNPD PE=1 SV=1;tr|H0Y8G5|H0Y8	4	1	0	0	0	1	1	0	0	0	0	6.4836	6464100	0	0	0	0	2206200	2269200	0	0	0	0
E9PMR5;C9J6H1;H0YF02;H0YEA2;E9PJ72;J3QL64;J3QKL5;J3KT01;A8MZH3;H7BYR8;J3QQK6;P02686	Myelin basic protein	MBP	tr|E9PMR5|E9PMR5_HUMAN Myelin basic protein OS=Homo sapiens OX=9606 GN=MBP PE=1 SV=2;tr|C9J6H1|C9J6H1_HUMAN Myelin basic protein (Fragment) OS=Homo sapiens OX=9606 GN=MBP PE=1 SV=1;tr|H0YF02|H0YF02_HUMAN Myelin basic protein OS=Homo sapiens OX=9606 GN=MBP	12	0	0	0	1	0	0	0	0	1	0	6.4692	5521900	0	0	0	1194000	0	0	0	0	1807100	0
Q9NR30	Nucleolar RNA helicase 2	DDX21	sp|Q9NR30|DDX21_HUMAN Nucleolar RNA helicase 2 OS=Homo sapiens OX=9606 GN=DDX21 PE=1 SV=5	1	0	0	0	0	1	0	0	0	0	1	6.4678	20068000	0	0	0	0	10699000	0	0	0	0	4562300
Q9Y4W2	Ribosomal biogenesis protein LAS1L	LAS1L	sp|Q9Y4W2|LAS1L_HUMAN Ribosomal biogenesis protein LAS1L OS=Homo sapiens OX=9606 GN=LAS1L PE=1 SV=2	1	0	0	0	1	0	0	0	0	0	0	6.4604	4804100	0	0	0	4804100	0	0	0	0	0	0
A0A0D9SFY5;A0A0D9SFE5;E9PBF6;P20700	Lamin-B1	LMNB1	tr|A0A0D9SFY5|A0A0D9SFY5_HUMAN Lamin-B1 (Fragment) OS=Homo sapiens OX=9606 GN=LMNB1 PE=1 SV=1;tr|A0A0D9SFE5|A0A0D9SFE5_HUMAN Lamin B1, isoform CRA_a OS=Homo sapiens OX=9606 GN=LMNB1 PE=1 SV=1;tr|E9PBF6|E9PBF6_HUMAN Lamin-B1 OS=Homo sapiens OX=9606 GN=LMNB1	4	0	0	0	0	0	0	0	0	0	0	6.455	526800	0	0	0	0	0	0	0	0	0	0
B1AJY5;B1AJY7;O75832	26S proteasome non-ATPase regulatory subunit 10	PSMD10	tr|B1AJY5|B1AJY5_HUMAN 26S proteasome non-ATPase regulatory subunit 10 OS=Homo sapiens OX=9606 GN=PSMD10 PE=1 SV=1;tr|B1AJY7|B1AJY7_HUMAN 26S proteasome non-ATPase regulatory subunit 10 OS=Homo sapiens OX=9606 GN=PSMD10 PE=1 SV=1;sp|O75832|PSD10_HUMAN 26S	3	0	0	0	0	0	0	0	0	0	0	6.4478	783570	0	0	0	0	0	0	0	0	0	0
A0A2R8Y602;A0A2U3TZY2;H0YGM0;Q9H078	Caseinolytic peptidase B protein homolog	CLPB	tr|A0A2R8Y602|A0A2R8Y602_HUMAN Caseinolytic peptidase B protein homolog (Fragment) OS=Homo sapiens OX=9606 GN=CLPB PE=1 SV=1;tr|A0A2U3TZY2|A0A2U3TZY2_HUMAN Caseinolytic peptidase B protein homolog OS=Homo sapiens OX=9606 GN=CLPB PE=1 SV=1;tr|H0YGM0|H0YGM0_	4	0	0	0	0	0	0	0	0	0	0	6.4417	0	0	0	0	0	0	0	0	0	0	0
G3XAL0;P40926	Malate dehydrogenase;Malate dehydrogenase, mitochondrial	MDH2	tr|G3XAL0|G3XAL0_HUMAN Malate dehydrogenase OS=Homo sapiens OX=9606 GN=MDH2 PE=1 SV=1;sp|P40926|MDHM_HUMAN Malate dehydrogenase, mitochondrial OS=Homo sapiens OX=9606 GN=MDH2 PE=1 SV=3	2	0	0	1	1	1	1	1	0	0	1	6.4405	23725000	0	0	3060500	2209400	4075100	1849900	2200100	0	0	3126300
U3KQL0;U3KQP5;Q5QPE4;Q5QPE5;Q9Y5X3	Sorting nexin-5	SNX5	tr|U3KQL0|U3KQL0_HUMAN Sorting nexin 5 isoform 2 OS=Homo sapiens OX=9606 GN=SNX5 PE=1 SV=1;tr|U3KQP5|U3KQP5_HUMAN Sorting nexin-5 OS=Homo sapiens OX=9606 GN=SNX5 PE=1 SV=1;tr|Q5QPE4|Q5QPE4_HUMAN Sorting nexin-5 (Fragment) OS=Homo sapiens OX=9606 GN=SNX5 PE	5	0	0	0	0	0	0	0	0	0	0	6.4388	0	0	0	0	0	0	0	0	0	0	0
H0Y8D1;A6XMV8;CON__P07477;A0A0J9YYC8;E7EQ64;A6XMV9;Q8NHM4;P07478;P07477	Putative trypsin-6;Trypsin-2;Trypsin-1;Alpha-trypsin chain 1;Alpha-trypsin chain 2	PRSS1;PRSS3P2;PRSS2	tr|H0Y8D1|H0Y8D1_HUMAN Trypsin-1 (Fragment) OS=Homo sapiens OX=9606 GN=PRSS1 PE=1 SV=1;tr|A6XMV8|A6XMV8_HUMAN Protease serine 2 preproprotein OS=Homo sapiens OX=9606 GN=PRSS2 PE=1 SV=1;;tr|A0A0J9YYC8|A0A0J9YYC8_HUMAN Trypsin-2 OS=Homo sapiens OX=9606 GN=PR	9	1	0	1	0	0	0	0	0	0	0	6.4354	8042700	2483400	0	2269600	0	0	0	0	0	0	0
F8VZX9;F8VY03;G3V1U3;F8VRR3;F8VQZ7;P50579	Methionine aminopeptidase 2	METAP2	tr|F8VZX9|F8VZX9_HUMAN Methionine aminopeptidase 2 (Fragment) OS=Homo sapiens OX=9606 GN=METAP2 PE=1 SV=1;tr|F8VY03|F8VY03_HUMAN Methionine aminopeptidase 2 (Fragment) OS=Homo sapiens OX=9606 GN=METAP2 PE=1 SV=1;tr|G3V1U3|G3V1U3_HUMAN Methionine aminopepti	6	0	1	1	0	0	0	0	1	1	0	6.4334	7027100	0	1144300	1794500	0	0	0	0	1027000	1924800	0
K7EME7;K7ER96;O43396	Thioredoxin-like protein 1	TXNL1	tr|K7EME7|K7EME7_HUMAN Thioredoxin-like protein 1 (Fragment) OS=Homo sapiens OX=9606 GN=TXNL1 PE=1 SV=1;tr|K7ER96|K7ER96_HUMAN Thioredoxin-like protein 1 (Fragment) OS=Homo sapiens OX=9606 GN=TXNL1 PE=1 SV=1;sp|O43396|TXNL1_HUMAN Thioredoxin-like protein 1	3	0	0	0	0	0	0	0	0	0	0	6.4147	930160	0	0	0	0	0	0	0	0	0	0
P52333	Tyrosine-protein kinase JAK3	JAK3	sp|P52333|JAK3_HUMAN Tyrosine-protein kinase JAK3 OS=Homo sapiens OX=9606 GN=JAK3 PE=1 SV=2	1	0	0	0	0	0	0	0	0	0	0	6.4089	29581000	0	0	0	0	0	0	0	0	0	0
A0A3B3IS02;Q6P3X3	Tetratricopeptide repeat protein 27	TTC27	tr|A0A3B3IS02|A0A3B3IS02_HUMAN Tetratricopeptide repeat protein 27 OS=Homo sapiens OX=9606 GN=TTC27 PE=1 SV=1;sp|Q6P3X3|TTC27_HUMAN Tetratricopeptide repeat protein 27 OS=Homo sapiens OX=9606 GN=TTC27 PE=1 SV=1	2	1	0	0	0	0	0	0	0	0	0	6.4025	2868800	2868800	0	0	0	0	0	0	0	0	0
Q13347	Eukaryotic translation initiation factor 3 subunit I	EIF3I	sp|Q13347|EIF3I_HUMAN Eukaryotic translation initiation factor 3 subunit I OS=Homo sapiens OX=9606 GN=EIF3I PE=1 SV=1	1	1	1	0	0	1	1	1	1	0	0	6.4009	9138900	1051900	1556200	0	0	1365500	1061600	1723200	629580	0	0
Q9BPX3	Condensin complex subunit 3	NCAPG	sp|Q9BPX3|CND3_HUMAN Condensin complex subunit 3 OS=Homo sapiens OX=9606 GN=NCAPG PE=1 SV=1	1	1	1	0	0	0	0	0	0	0	0	6.3911	4044300	1353800	2690500	0	0	0	0	0	0	0	0
E7ET15;O15042	U2 snRNP-associated SURP motif-containing protein	U2SURP	tr|E7ET15|E7ET15_HUMAN U2 snRNP-associated SURP motif-containing protein OS=Homo sapiens OX=9606 GN=U2SURP PE=1 SV=1;sp|O15042|SR140_HUMAN U2 snRNP-associated SURP motif-containing protein OS=Homo sapiens OX=9606 GN=U2SURP PE=1 SV=2	2	0	0	1	0	1	1	0	0	1	0	6.3878	12679000	0	0	2183500	0	0	2899500	0	0	1540300	0
A0A0C4DGC5;Q5TCI8;P02545	Prelamin-A/C;Lamin-A/C	LMNA	tr|A0A0C4DGC5|A0A0C4DGC5_HUMAN Prelamin-A/C (Fragment) OS=Homo sapiens OX=9606 GN=LMNA PE=1 SV=1;tr|Q5TCI8|Q5TCI8_HUMAN Prelamin-A/C OS=Homo sapiens OX=9606 GN=LMNA PE=1 SV=1;sp|P02545|LMNA_HUMAN Prelamin-A/C OS=Homo sapiens OX=9606 GN=LMNA PE=1 SV=1	3	0	0	0	0	0	0	0	0	0	0	6.3811	2102600	0	0	0	0	0	0	0	0	0	0
E9PM69;R4GNH3;P17980	26S protease regulatory subunit 6A	PSMC3	tr|E9PM69|E9PM69_HUMAN 26S proteasome regulatory subunit 6A OS=Homo sapiens OX=9606 GN=PSMC3 PE=1 SV=1;tr|R4GNH3|R4GNH3_HUMAN 26S proteasome regulatory subunit 6A OS=Homo sapiens OX=9606 GN=PSMC3 PE=1 SV=1;sp|P17980|PRS6A_HUMAN 26S proteasome regulatory su	3	0	0	0	0	0	0	0	0	0	0	6.372	0	0	0	0	0	0	0	0	0	0	0
E9PQI3;E9PLT3;E9PKI4;A0A0B4J225;E9PIZ5;E9PKD3;E9PIR7;F8W809;A0A087WSW9;A0A182DWI3;A0A087WSY9;Q16881	Thioredoxin reductase 1, cytoplasmic	TXNRD1	tr|E9PQI3|E9PQI3_HUMAN Thioredoxin reductase 1, cytoplasmic (Fragment) OS=Homo sapiens OX=9606 GN=TXNRD1 PE=1 SV=1;tr|E9PLT3|E9PLT3_HUMAN Thioredoxin reductase 1, cytoplasmic (Fragment) OS=Homo sapiens OX=9606 GN=TXNRD1 PE=1 SV=1;tr|E9PKI4|E9PKI4_HUMAN Thi	12	0	0	0	0	0	0	0	0	0	1	6.3717	1461400	0	0	0	0	0	0	0	0	0	1461400
P12004	Proliferating cell nuclear antigen	PCNA	sp|P12004|PCNA_HUMAN Proliferating cell nuclear antigen OS=Homo sapiens OX=9606 GN=PCNA PE=1 SV=1	1	0	0	0	0	0	0	0	0	0	1	6.3685	12816000	0	0	0	0	0	0	0	0	0	3989200
O75533	Splicing factor 3B subunit 1	SF3B1	sp|O75533|SF3B1_HUMAN Splicing factor 3B subunit 1 OS=Homo sapiens OX=9606 GN=SF3B1 PE=1 SV=3	1	0	0	0	0	0	0	0	0	0	0	6.3277	0	0	0	0	0	0	0	0	0	0	0
H0YE03;H7C3G7;Q2TBE0	CWF19-like protein 2	CWF19L2	tr|H0YE03|H0YE03_HUMAN CWF19-like protein 2 (Fragment) OS=Homo sapiens OX=9606 GN=CWF19L2 PE=1 SV=1;tr|H7C3G7|H7C3G7_HUMAN CWF19-like protein 2 (Fragment) OS=Homo sapiens OX=9606 GN=CWF19L2 PE=1 SV=1;sp|Q2TBE0|C19L2_HUMAN CWF19-like protein 2 OS=Homo sapie	3	0	0	0	1	1	0	0	0	0	0	6.316	1378400	0	0	0	0	1378400	0	0	0	0	0
F6S6P2;X6REW1;A0A0G2JJM1;A0A0G2JL47;A0A024RCR6;A0A0G2JK23;P46379	Large proline-rich protein BAG6	BAG6;BAT3	tr|F6S6P2|F6S6P2_HUMAN Large proline-rich protein BAG6 (Fragment) OS=Homo sapiens OX=9606 GN=BAG6 PE=1 SV=1;tr|X6REW1|X6REW1_HUMAN Large proline-rich protein BAG6 (Fragment) OS=Homo sapiens OX=9606 GN=BAG6 PE=1 SV=7;tr|A0A0G2JJM1|A0A0G2JJM1_HUMAN Large pro	7	1	1	0	0	0	0	0	0	0	0	6.2853	2563800	1824800	739020	0	0	0	0	0	0	0	0
C9JLU1;P52434	DNA-directed RNA polymerases I, II, and III subunit RPABC3	POLR2H	tr|C9JLU1|C9JLU1_HUMAN DNA-directed RNA polymerases I, II, and III subunit RPABC3 (Fragment) OS=Homo sapiens OX=9606 GN=POLR2H PE=1 SV=8;sp|P52434|RPAB3_HUMAN DNA-directed RNA polymerases I, II, and III subunit RPABC3 OS=Homo sapiens OX=9606 GN=POLR2H PE=1	2	0	0	0	0	0	0	0	0	0	0	6.2792	2240500	0	0	0	0	0	0	0	0	0	0
C9JEV0;P25311	Zinc-alpha-2-glycoprotein	AZGP1	tr|C9JEV0|C9JEV0_HUMAN Zinc-alpha-2-glycoprotein OS=Homo sapiens OX=9606 GN=AZGP1 PE=1 SV=1;sp|P25311|ZA2G_HUMAN Zinc-alpha-2-glycoprotein OS=Homo sapiens OX=9606 GN=AZGP1 PE=1 SV=2	2	0	0	1	1	1	1	0	0	0	0	6.2757	21586000	0	0	3318400	2903800	6415400	2592500	0	0	0	0
A0A2R8Y6J3;P46777	60S ribosomal protein L5	RPL5	tr|A0A2R8Y6J3|A0A2R8Y6J3_HUMAN 60S ribosomal protein L5 (Fragment) OS=Homo sapiens OX=9606 GN=RPL5 PE=1 SV=1;sp|P46777|RL5_HUMAN 60S ribosomal protein L5 OS=Homo sapiens OX=9606 GN=RPL5 PE=1 SV=3	2	0	0	0	0	1	0	0	0	0	1	6.2717	1715400	0	0	0	0	1083200	0	0	0	0	632240
V9GYG0;P12236;P12235;P05141;Q9H0C2	ADP/ATP translocase 3;ADP/ATP translocase 3, N-terminally processed;ADP/ATP translocase 1;ADP/ATP translocase 2;ADP/ATP translocase 2, N-terminally processed;ADP/ATP translocase 4;ADP/ATP translocase 4, N-terminally processed	SLC25A4;SLC25A6;SLC25A5;SLC25A31	tr|V9GYG0|V9GYG0_HUMAN ADP/ATP translocase 1 OS=Homo sapiens OX=9606 GN=SLC25A4 PE=1 SV=1;sp|P12236|ADT3_HUMAN ADP/ATP translocase 3 OS=Homo sapiens OX=9606 GN=SLC25A6 PE=1 SV=4;sp|P12235|ADT1_HUMAN ADP/ATP translocase 1 OS=Homo sapiens OX=9606 GN=SLC25A4	5	0	1	0	1	0	0	0	0	1	0	6.2614	2978200	0	1011700	0	911760	0	0	0	0	0	0
Q96CX2	BTB/POZ domain-containing protein KCTD12	KCTD12	sp|Q96CX2|KCD12_HUMAN BTB/POZ domain-containing protein KCTD12 OS=Homo sapiens OX=9606 GN=KCTD12 PE=1 SV=1	1	0	1	1	1	0	0	0	0	0	0	6.2542	4079600	0	1014400	1820100	1245100	0	0	0	0	0	0
P61020	Ras-related protein Rab-5B	RAB5B	sp|P61020|RAB5B_HUMAN Ras-related protein Rab-5B OS=Homo sapiens OX=9606 GN=RAB5B PE=1 SV=1	1	0	0	0	0	0	0	0	0	0	0	6.2418	2302800	0	0	0	0	0	0	0	0	0	0
E7EX40;Q7L804;Q6WKZ4	Rab11 family-interacting protein 2;Rab11 family-interacting protein 1	RAB11FIP1;RAB11FIP2	tr|E7EX40|E7EX40_HUMAN Rab11 family-interacting protein 1 OS=Homo sapiens OX=9606 GN=RAB11FIP1 PE=1 SV=1;sp|Q7L804|RFIP2_HUMAN Rab11 family-interacting protein 2 OS=Homo sapiens OX=9606 GN=RAB11FIP2 PE=1 SV=1;sp|Q6WKZ4|RFIP1_HUMAN Rab11 family-interacting	3	1	0	0	0	0	1	0	0	1	0	6.2386	3720800	1417300	0	0	0	0	2303500	0	0	0	0
A9JX13;Q9UGU0	Transcription factor 20	TCF20	tr|A9JX13|A9JX13_HUMAN Transcription factor 20 OS=Homo sapiens OX=9606 GN=TCF20 PE=1 SV=1;sp|Q9UGU0|TCF20_HUMAN Transcription factor 20 OS=Homo sapiens OX=9606 GN=TCF20 PE=1 SV=3	2	0	0	1	1	0	1	0	0	1	0	6.2372	4966000	0	0	961220	589430	0	829710	0	0	994430	0
F8WDU7;Q9UGU5	HMG domain-containing protein 4	HMGXB4	tr|F8WDU7|F8WDU7_HUMAN HMG domain-containing protein 4 OS=Homo sapiens OX=9606 GN=HMGXB4 PE=1 SV=1;sp|Q9UGU5|HMGX4_HUMAN HMG domain-containing protein 4 OS=Homo sapiens OX=9606 GN=HMGXB4 PE=1 SV=2	2	0	0	0	1	0	0	0	0	0	0	6.2261	847850	0	0	0	847850	0	0	0	0	0	0
Q2VIR3;P41091	Putative eukaryotic translation initiation factor 2 subunit 3-like protein;Eukaryotic translation initiation factor 2 subunit 3	EIF2S3L;EIF2S3	sp|Q2VIR3|IF2GL_HUMAN Eukaryotic translation initiation factor 2 subunit 3B OS=Homo sapiens OX=9606 GN=EIF2S3B PE=2 SV=2;sp|P41091|IF2G_HUMAN Eukaryotic translation initiation factor 2 subunit 3 OS=Homo sapiens OX=9606 GN=EIF2S3 PE=1 SV=3	2	0	1	0	0	1	0	1	0	0	0	6.2071	12029000	0	1891200	0	0	2162800	0	3041100	0	0	0
A0A2R8YG21			tr|A0A2R8YG21|A0A2R8YG21_HUMAN Trifunctional enzyme subunit alpha, mitochondrial OS=Homo sapiens OX=9606 GN=HADHA PE=1 SV=1	1	0	0	0	0	0	0	0	0	0	1	6.2055	0	0	0	0	0	0	0	0	0	0	0
CON__P28800				1	0	0	0	0	0	0	0	0	0	0	6.2018	1452700	0	0	0	0	0	0	0	0	0	0
F2Z2K8;C9JIK8;Q9Y4P1	Cysteine protease ATG4B	ATG4B	tr|F2Z2K8|F2Z2K8_HUMAN Cysteine protease ATG4B OS=Homo sapiens OX=9606 GN=ATG4B PE=1 SV=1;tr|C9JIK8|C9JIK8_HUMAN Cysteine protease (Fragment) OS=Homo sapiens OX=9606 GN=ATG4B PE=1 SV=1;sp|Q9Y4P1|ATG4B_HUMAN Cysteine protease ATG4B OS=Homo sapiens OX=9606 G	3	0	0	1	0	0	0	0	0	0	0	6.1997	0	0	0	0	0	0	0	0	0	0	0
H0YEX2;Q6P1X5	Transcription initiation factor TFIID subunit 2	TAF2	tr|H0YEX2|H0YEX2_HUMAN Transcription initiation factor TFIID subunit 2 (Fragment) OS=Homo sapiens OX=9606 GN=TAF2 PE=1 SV=1;sp|Q6P1X5|TAF2_HUMAN Transcription initiation factor TFIID subunit 2 OS=Homo sapiens OX=9606 GN=TAF2 PE=1 SV=3	2	0	0	0	0	1	0	0	0	0	0	6.1979	0	0	0	0	0	0	0	0	0	0	0
P11055	Myosin-3	MYH3	sp|P11055|MYH3_HUMAN Myosin-3 OS=Homo sapiens OX=9606 GN=MYH3 PE=1 SV=3	1	0	0	1	0	0	0	0	0	0	0	6.193	2489000	0	0	2489000	0	0	0	0	0	0	0
M0QXH0;Q99757	Thioredoxin, mitochondrial	TXN2	tr|M0QXH0|M0QXH0_HUMAN Thioredoxin, mitochondrial OS=Homo sapiens OX=9606 GN=TXN2 PE=1 SV=1;sp|Q99757|THIOM_HUMAN Thioredoxin, mitochondrial OS=Homo sapiens OX=9606 GN=TXN2 PE=1 SV=2	2	0	0	0	0	0	0	0	0	0	0	6.1923	3193300	0	0	0	0	0	0	0	0	0	0
P45974	Ubiquitin carboxyl-terminal hydrolase 5	USP5	sp|P45974|UBP5_HUMAN Ubiquitin carboxyl-terminal hydrolase 5 OS=Homo sapiens OX=9606 GN=USP5 PE=1 SV=2	1	0	0	1	0	0	0	0	0	0	0	6.1863	3584700	0	0	3584700	0	0	0	0	0	0	0
Q9Y277	Voltage-dependent anion-selective channel protein 3	VDAC3	sp|Q9Y277|VDAC3_HUMAN Voltage-dependent anion-selective channel protein 3 OS=Homo sapiens OX=9606 GN=VDAC3 PE=1 SV=1	1	0	0	0	0	0	0	0	0	0	1	6.1826	2711200	0	0	0	0	0	0	0	0	0	737300
H0Y7C1;B1AKY9;P50993	Sodium/potassium-transporting ATPase subunit alpha-2	ATP1A2	tr|H0Y7C1|H0Y7C1_HUMAN Sodium/potassium-transporting ATPase subunit alpha (Fragment) OS=Homo sapiens OX=9606 GN=ATP1A2 PE=1 SV=1;tr|B1AKY9|B1AKY9_HUMAN Sodium/potassium-transporting ATPase subunit alpha OS=Homo sapiens OX=9606 GN=ATP1A2 PE=1 SV=1;sp|P50993	3	0	0	0	0	0	0	0	0	0	0	6.1707	1227000	0	0	0	0	0	0	0	0	0	0
Q5T097;P46939	Utrophin	UTRN	tr|Q5T097|Q5T097_HUMAN Utrophin OS=Homo sapiens OX=9606 GN=UTRN PE=1 SV=1;sp|P46939|UTRO_HUMAN Utrophin OS=Homo sapiens OX=9606 GN=UTRN PE=1 SV=2	2	0	0	0	0	0	0	0	0	0	0	6.1689	6731100	0	0	0	0	0	0	0	0	0	0
H0Y9Z7;A0A1B0GUA8;Q9H1H9	Kinesin-like protein KIF13A	KIF13A	tr|H0Y9Z7|H0Y9Z7_HUMAN Kinesin-like protein KIF13A (Fragment) OS=Homo sapiens OX=9606 GN=KIF13A PE=1 SV=1;tr|A0A1B0GUA8|A0A1B0GUA8_HUMAN Kinesin-like protein KIF13A OS=Homo sapiens OX=9606 GN=KIF13A PE=1 SV=1;sp|Q9H1H9|KI13A_HUMAN Kinesin-like protein KIF1	3	0	1	0	0	0	0	0	1	0	0	6.1642	18101000	0	7943700	0	0	0	0	0	10158000	0	0
K7ELG9;Q3MHD2	Protein LSM12 homolog	LSM12	tr|K7ELG9|K7ELG9_HUMAN Protein LSM12 homolog OS=Homo sapiens OX=9606 GN=LSM12 PE=1 SV=1;sp|Q3MHD2|LSM12_HUMAN Protein LSM12 homolog OS=Homo sapiens OX=9606 GN=LSM12 PE=1 SV=2	2	0	0	0	0	0	0	0	0	0	0	6.1595	2151500	0	0	0	0	0	0	0	0	0	0
Q96TA1	Niban-like protein 1	FAM129B	sp|Q96TA1|NIBA2_HUMAN Protein Niban 2 OS=Homo sapiens OX=9606 GN=NIBAN2 PE=1 SV=3	1	0	0	0	0	0	0	0	0	0	0	6.1593	1637600	0	0	0	0	0	0	0	0	0	0
P11172	Uridine 5-monophosphate synthase;Orotate phosphoribosyltransferase;Orotidine 5-phosphate decarboxylase	UMPS	sp|P11172|UMPS_HUMAN Uridine 5-monophosphate synthase OS=Homo sapiens OX=9606 GN=UMPS PE=1 SV=1	1	0	0	0	0	0	0	0	0	0	0	6.1498	477670	0	0	0	0	0	0	0	0	0	0
Q8WVV4	Protein POF1B	POF1B	sp|Q8WVV4|POF1B_HUMAN Protein POF1B OS=Homo sapiens OX=9606 GN=POF1B PE=1 SV=3	1	0	0	1	1	0	1	0	0	1	0	6.1487	9881300	0	0	2700900	1983200	0	1908600	0	0	1867400	0
P10599	Thioredoxin	TXN	sp|P10599|THIO_HUMAN Thioredoxin OS=Homo sapiens OX=9606 GN=TXN PE=1 SV=3	1	0	0	1	0	0	0	0	0	0	0	6.1416	3379000	0	0	3379000	0	0	0	0	0	0	0
C9J6N8;H7C5E5;C1K3N0;P05549	Transcription factor AP-2-alpha	TFAP2A	tr|C9J6N8|C9J6N8_HUMAN Transcription factor AP-2-alpha (Fragment) OS=Homo sapiens OX=9606 GN=TFAP2A PE=1 SV=1;tr|H7C5E5|H7C5E5_HUMAN Transcription factor AP-2-alpha (Fragment) OS=Homo sapiens OX=9606 GN=TFAP2A PE=1 SV=1;tr|C1K3N0|C1K3N0_HUMAN Transcription	4	0	0	0	0	1	0	0	0	0	0	6.1415	14315000	0	0	0	0	14315000	0	0	0	0	0
C9J975;Q96P47	Arf-GAP with GTPase, ANK repeat and PH domain-containing protein 3	AGAP3	tr|C9J975|C9J975_HUMAN Arf-GAP with GTPase, ANK repeat and PH domain-containing protein 3 OS=Homo sapiens OX=9606 GN=AGAP3 PE=1 SV=1;sp|Q96P47|AGAP3_HUMAN Arf-GAP with GTPase, ANK repeat and PH domain-containing protein 3 OS=Homo sapiens OX=9606 GN=AGAP3 P	2	0	0	0	0	0	0	0	0	0	0	6.1359	1526600	0	0	0	0	0	0	0	0	0	0
Q9BRS2	Serine/threonine-protein kinase RIO1	RIOK1	sp|Q9BRS2|RIOK1_HUMAN Serine/threonine-protein kinase RIO1 OS=Homo sapiens OX=9606 GN=RIOK1 PE=1 SV=2	1	1	0	0	0	0	0	0	0	0	0	6.1276	958660	958660	0	0	0	0	0	0	0	0	0
Q92616	Translational activator GCN1	GCN1L1	sp|Q92616|GCN1_HUMAN eIF-2-alpha kinase activator GCN1 OS=Homo sapiens OX=9606 GN=GCN1 PE=1 SV=6	1	0	0	1	0	0	0	0	0	0	0	6.1259	0	0	0	0	0	0	0	0	0	0	0
P41250	Glycine--tRNA ligase	GARS	sp|P41250|GARS_HUMAN Glycine--tRNA ligase OS=Homo sapiens OX=9606 GN=GARS1 PE=1 SV=3	1	0	1	0	0	0	0	1	0	0	0	6.1199	3316500	0	1132100	0	0	0	0	2184400	0	0	0

## Sheet: Table S4 
source	term_name	term_id	highlighted	adjusted_p_value	negative_log10_of_adjusted_p_value	term_size	query_size	intersection_size	effective_domain_size	intersections
GO:MF	RNA binding	GO:0003723	TRUE	5.861169576388502e-37	36.23201571335232	3113	163	99	20139	SON,NOP58,SYNCRIP,VIM,TCERG1,PUF60,EIF4A3,MRPL15,RPS26,HDLBP,EIF5A,NOP56,DDX18,RPS7,RPS8,DDX56,SERPINH1,PFN1,SRP14,RPS6,HNRNPM,EIF4A1,HNRNPA2B1,HNRNPK,FTSJ3,PDIA3,HNRNPA1,RPL23A,CKAP4,TCOF1,HNRNPU,SFPQ,RAN,NAT10,SMARCA4,EEF2,TOP1,C1QBP,NCL,DDX3X,RBM39,SNRPE,RPS24,RPL12,SERBP1,SNW1,IGF2BP1,NAP1L1,KNOP1,DDX5,RPS15A,CDC5L,DNMT1,RPL31,PRMT1,NAF1,MYBBP1A,LUC7L3,SRPK1,RPSA,DHX16,PTBP1,SHMT2,GTPBP4,RPL1…
GO:MF	heterocyclic compound binding	GO:1901363	FALSE	1.219600376334701e-29	28.913782450295457	7455	163	134	20139	SON,ALB,NOP58,SYNCRIP,VIM,GTF3C1,CAD,TCERG1,PUF60,EIF4A3,MRPL15,RPS26,HDLBP,MAT1A,EIF5A,NOP56,DDX18,RPS7,RPS8,DDX56,SERPINH1,PFN1,SRP14,RPS6,HNRNPM,HIST1H2BN,EIF4A1,HNRNPA2B1,HNRNPK,CKB,TUBB,FTSJ3,PDIA3,HNRNPA1,RPL23A,CKAP4,TCOF1,HNRNPU,SFPQ,RAN,NAT10,NME1-NME2,SMARCA4,EEF2,TOP1,C1QBP,NCL,DDX3X,RBM39,SNRPE,RPS24,RPL12,SERBP1,SNW1,TTF1,IGF2BP1,NAP1L1,KNOP1,DDX5,RPS15A,CDC5L,DNMT1,RPL31,PSMC5,PRMT1…
GO:MF	organic cyclic compound binding	GO:0097159	FALSE	3.7407189802727574e-29	28.427044916741927	7526	163	134	20139	SON,ALB,NOP58,SYNCRIP,VIM,GTF3C1,CAD,TCERG1,PUF60,EIF4A3,MRPL15,RPS26,HDLBP,MAT1A,EIF5A,NOP56,DDX18,RPS7,RPS8,DDX56,SERPINH1,PFN1,SRP14,RPS6,HNRNPM,HIST1H2BN,EIF4A1,HNRNPA2B1,HNRNPK,CKB,TUBB,FTSJ3,PDIA3,HNRNPA1,RPL23A,CKAP4,TCOF1,HNRNPU,SFPQ,RAN,NAT10,NME1-NME2,SMARCA4,EEF2,TOP1,C1QBP,NCL,DDX3X,RBM39,SNRPE,RPS24,RPL12,SERBP1,SNW1,TTF1,IGF2BP1,NAP1L1,KNOP1,DDX5,RPS15A,CDC5L,DNMT1,RPL31,PSMC5,PRMT1…
GO:MF	nucleic acid binding	GO:0003676	FALSE	1.5507896732339177e-22	21.809447099638298	5480	163	108	20139	SON,ALB,NOP58,SYNCRIP,VIM,GTF3C1,TCERG1,PUF60,EIF4A3,MRPL15,RPS26,HDLBP,EIF5A,NOP56,DDX18,RPS7,RPS8,DDX56,SERPINH1,PFN1,SRP14,RPS6,HNRNPM,HIST1H2BN,EIF4A1,HNRNPA2B1,HNRNPK,FTSJ3,PDIA3,HNRNPA1,RPL23A,CKAP4,TCOF1,HNRNPU,SFPQ,RAN,NAT10,SMARCA4,EEF2,TOP1,C1QBP,NCL,DDX3X,RBM39,SNRPE,RPS24,RPL12,SERBP1,SNW1,TTF1,IGF2BP1,NAP1L1,KNOP1,DDX5,RPS15A,CDC5L,DNMT1,RPL31,PRMT1,NAF1,MYBBP1A,LUC7L3,SRPK1,RPSA,DHX…
GO:MF	small molecule binding	GO:0036094	TRUE	1.5650705766392894e-19	18.805466073226874	2583	163	71	20139	ALB,GYS1,CAD,EIF4A3,UBR2,MAT1A,DDX18,DDX56,PFN1,EIF4A1,CKB,TUBB,HNRNPU,RAN,NAT10,NME1-NME2,SMARCA4,EEF2,TOP1,DDX3X,DDX5,DNMT1,PSMC5,PRMT1,HSPH1,PAICS,SRPK1,DHX16,SHMT2,ABCE1,GTPBP4,NOL9,TAOK1,HSPA5,PARP1,HSPA4,MYH9,PRPF4B,CTPS1,GAPDH,ALDOA,PKM,CCT3,ABCF1,EIF5B,DDX17,GNL3,HSPD1,CHD4,HSPA9,PCCB,ACLY,ACTG1,TSR1,CCT2,TUBB2B,MCCC1,FASN,ACACB,TUBA1A,PCCA,HSPA1B,PC,ACACA,SNRNP200,DHX9,EXOSC10,DHX15,DDX5…
GO:MF	nucleotide binding	GO:0000166	FALSE	3.2268413531730318e-19	18.491222386047973	2182	163	65	20139	CAD,EIF4A3,MAT1A,DDX18,DDX56,PFN1,EIF4A1,CKB,TUBB,HNRNPU,RAN,NAT10,NME1-NME2,SMARCA4,EEF2,TOP1,DDX3X,DDX5,DNMT1,PSMC5,PRMT1,HSPH1,PAICS,SRPK1,DHX16,ABCE1,GTPBP4,NOL9,TAOK1,HSPA5,PARP1,HSPA4,MYH9,PRPF4B,CTPS1,GAPDH,PKM,CCT3,ABCF1,EIF5B,DDX17,GNL3,HSPD1,CHD4,HSPA9,PCCB,ACLY,ACTG1,TSR1,CCT2,TUBB2B,MCCC1,ACACB,TUBA1A,PCCA,HSPA1B,PC,ACACA,SNRNP200,DHX9,EXOSC10,DHX15,DDX50,RABL6,ATAD5
GO:MF	nucleoside phosphate binding	GO:1901265	FALSE	3.3080886723254836e-19	18.480422857830032	2183	163	65	20139	CAD,EIF4A3,MAT1A,DDX18,DDX56,PFN1,EIF4A1,CKB,TUBB,HNRNPU,RAN,NAT10,NME1-NME2,SMARCA4,EEF2,TOP1,DDX3X,DDX5,DNMT1,PSMC5,PRMT1,HSPH1,PAICS,SRPK1,DHX16,ABCE1,GTPBP4,NOL9,TAOK1,HSPA5,PARP1,HSPA4,MYH9,PRPF4B,CTPS1,GAPDH,PKM,CCT3,ABCF1,EIF5B,DDX17,GNL3,HSPD1,CHD4,HSPA9,PCCB,ACLY,ACTG1,TSR1,CCT2,TUBB2B,MCCC1,ACACB,TUBA1A,PCCA,HSPA1B,PC,ACACA,SNRNP200,DHX9,EXOSC10,DHX15,DDX50,RABL6,ATAD5
GO:MF	purine nucleotide binding	GO:0017076	FALSE	9.53453481276093e-19	18.02070049120522	2019	163	62	20139	CAD,EIF4A3,MAT1A,DDX18,DDX56,PFN1,EIF4A1,CKB,TUBB,HNRNPU,RAN,NAT10,NME1-NME2,SMARCA4,EEF2,TOP1,DDX3X,DDX5,PSMC5,HSPH1,PAICS,SRPK1,DHX16,ABCE1,GTPBP4,NOL9,TAOK1,HSPA5,PARP1,HSPA4,MYH9,PRPF4B,CTPS1,GAPDH,PKM,CCT3,ABCF1,EIF5B,DDX17,GNL3,HSPD1,CHD4,HSPA9,PCCB,ACLY,ACTG1,TSR1,CCT2,TUBB2B,MCCC1,ACACB,TUBA1A,PCCA,HSPA1B,PC,ACACA,SNRNP200,DHX9,DHX15,DDX50,RABL6,ATAD5
GO:MF	purine ribonucleoside triphosphate binding	GO:0035639	FALSE	2.0919854557554753e-18	17.67944133916762	1849	163	59	20139	CAD,EIF4A3,MAT1A,DDX18,DDX56,EIF4A1,CKB,TUBB,HNRNPU,RAN,NAT10,NME1-NME2,SMARCA4,EEF2,TOP1,DDX3X,DDX5,PSMC5,HSPH1,PAICS,SRPK1,DHX16,ABCE1,GTPBP4,NOL9,TAOK1,HSPA5,HSPA4,MYH9,PRPF4B,CTPS1,PKM,CCT3,ABCF1,EIF5B,DDX17,GNL3,HSPD1,CHD4,HSPA9,PCCB,ACLY,ACTG1,TSR1,CCT2,TUBB2B,MCCC1,ACACB,TUBA1A,PCCA,HSPA1B,PC,ACACA,SNRNP200,DHX9,DHX15,DDX50,RABL6,ATAD5
GO:MF	purine ribonucleotide binding	GO:0032555	FALSE	1.2144883504875805e-17	16.915606646641663	1916	163	59	20139	CAD,EIF4A3,MAT1A,DDX18,DDX56,EIF4A1,CKB,TUBB,HNRNPU,RAN,NAT10,NME1-NME2,SMARCA4,EEF2,TOP1,DDX3X,DDX5,PSMC5,HSPH1,PAICS,SRPK1,DHX16,ABCE1,GTPBP4,NOL9,TAOK1,HSPA5,HSPA4,MYH9,PRPF4B,CTPS1,PKM,CCT3,ABCF1,EIF5B,DDX17,GNL3,HSPD1,CHD4,HSPA9,PCCB,ACLY,ACTG1,TSR1,CCT2,TUBB2B,MCCC1,ACACB,TUBA1A,PCCA,HSPA1B,PC,ACACA,SNRNP200,DHX9,DHX15,DDX50,RABL6,ATAD5
GO:MF	ribonucleotide binding	GO:0032553	FALSE	1.874480041517088e-17	16.72711917935827	1933	163	59	20139	CAD,EIF4A3,MAT1A,DDX18,DDX56,EIF4A1,CKB,TUBB,HNRNPU,RAN,NAT10,NME1-NME2,SMARCA4,EEF2,TOP1,DDX3X,DDX5,PSMC5,HSPH1,PAICS,SRPK1,DHX16,ABCE1,GTPBP4,NOL9,TAOK1,HSPA5,HSPA4,MYH9,PRPF4B,CTPS1,PKM,CCT3,ABCF1,EIF5B,DDX17,GNL3,HSPD1,CHD4,HSPA9,PCCB,ACLY,ACTG1,TSR1,CCT2,TUBB2B,MCCC1,ACACB,TUBA1A,PCCA,HSPA1B,PC,ACACA,SNRNP200,DHX9,DHX15,DDX50,RABL6,ATAD5
GO:MF	anion binding	GO:0043168	FALSE	7.047504700509551e-16	15.151964625792695	2446	163	64	20139	ALB,IQGAP1,CAD,EIF4A3,UBR2,MAT1A,DDX18,DDX56,PFN1,EIF4A1,CKB,TUBB,HNRNPU,RAN,NAT10,NME1-NME2,SMARCA4,EEF2,TOP1,DDX3X,DDX5,PSMC5,HSPH1,PAICS,SRPK1,DHX16,SHMT2,ABCE1,GTPBP4,NOL9,TAOK1,HSPA5,HSPA4,MYH9,PRPF4B,CTPS1,PKM,CCT3,ABCF1,EIF5B,DDX17,GNL3,HSPD1,CHD4,HSPA9,PCCB,ACLY,ACTG1,TSR1,CCT2,TUBB2B,MCCC1,ACACB,TUBA1A,PCCA,HSPA1B,PC,ACACA,SNRNP200,DHX9,DHX15,DDX50,RABL6,ATAD5
GO:MF	adenyl nucleotide binding	GO:0030554	FALSE	2.361826207413585e-15	14.626752062665842	1658	163	52	20139	CAD,EIF4A3,MAT1A,DDX18,DDX56,PFN1,EIF4A1,CKB,HNRNPU,NAT10,NME1-NME2,SMARCA4,TOP1,DDX3X,DDX5,PSMC5,HSPH1,PAICS,SRPK1,DHX16,ABCE1,NOL9,TAOK1,HSPA5,PARP1,HSPA4,MYH9,PRPF4B,CTPS1,GAPDH,PKM,CCT3,ABCF1,DDX17,HSPD1,CHD4,HSPA9,PCCB,ACLY,ACTG1,CCT2,MCCC1,ACACB,PCCA,HSPA1B,PC,ACACA,SNRNP200,DHX9,DHX15,DDX50,ATAD5
GO:MF	carbohydrate derivative binding	GO:0097367	FALSE	3.1335638554372594e-15	14.503961450866203	2294	163	61	20139	VTN,CAD,EIF4A3,MAT1A,DDX18,DDX56,EIF4A1,CKB,TUBB,HNRNPU,RAN,NAT10,NME1-NME2,SMARCA4,EEF2,TOP1,C1QBP,DDX3X,DDX5,PSMC5,HSPH1,PAICS,SRPK1,DHX16,ABCE1,GTPBP4,NOL9,TAOK1,HSPA5,HSPA4,MYH9,PRPF4B,CTPS1,PKM,CCT3,ABCF1,EIF5B,DDX17,GNL3,HSPD1,CHD4,HSPA9,PCCB,ACLY,ACTG1,TSR1,CCT2,TUBB2B,MCCC1,ACACB,TUBA1A,PCCA,HSPA1B,PC,ACACA,SNRNP200,DHX9,DHX15,DDX50,RABL6,ATAD5
GO:MF	ATP binding	GO:0005524	FALSE	5.091360987044991e-15	14.293166109577523	1495	163	49	20139	CAD,EIF4A3,MAT1A,DDX18,DDX56,EIF4A1,CKB,HNRNPU,NAT10,NME1-NME2,SMARCA4,TOP1,DDX3X,DDX5,PSMC5,HSPH1,PAICS,SRPK1,DHX16,ABCE1,NOL9,TAOK1,HSPA5,HSPA4,MYH9,PRPF4B,CTPS1,PKM,CCT3,ABCF1,DDX17,HSPD1,CHD4,HSPA9,PCCB,ACLY,ACTG1,CCT2,MCCC1,ACACB,PCCA,HSPA1B,PC,ACACA,SNRNP200,DHX9,DHX15,DDX50,ATAD5
GO:MF	mRNA binding	GO:0003729	FALSE	1.2845607087799126e-14	13.891245366006363	361	163	26	20139	SYNCRIP,EIF4A3,RPS26,HDLBP,RPS7,HNRNPM,EIF4A1,HNRNPA2B1,HNRNPK,HNRNPU,C1QBP,NCL,DDX3X,SERBP1,IGF2BP1,DDX5,LUC7L3,PTBP1,SHMT2,SRRM2,RPS2,PKM,DDX17,GNL3,DHX9,RPS3
GO:MF	adenyl ribonucleotide binding	GO:0032559	FALSE	2.5886132494039972e-14	13.58693283028987	1556	163	49	20139	CAD,EIF4A3,MAT1A,DDX18,DDX56,EIF4A1,CKB,HNRNPU,NAT10,NME1-NME2,SMARCA4,TOP1,DDX3X,DDX5,PSMC5,HSPH1,PAICS,SRPK1,DHX16,ABCE1,NOL9,TAOK1,HSPA5,HSPA4,MYH9,PRPF4B,CTPS1,PKM,CCT3,ABCF1,DDX17,HSPD1,CHD4,HSPA9,PCCB,ACLY,ACTG1,CCT2,MCCC1,ACACB,PCCA,HSPA1B,PC,ACACA,SNRNP200,DHX9,DHX15,DDX50,ATAD5
GO:MF	cadherin binding	GO:0045296	FALSE	2.7876901202896443e-13	12.554755504077574	335	163	24	20139	IQGAP1,PUF60,RPS26,HDLBP,PRDX6,NOP56,PFN1,HNRNPK,RPL23A,RAN,EEF2,DDX3X,SERBP1,UNC45A,PAICS,ENO1,HSPA5,MYH9,RPS2,ALDOA,EEF1G,PKM,FASN,EZR
GO:MF	protein binding	GO:0005515	FALSE	6.436432964821146e-12	11.191354749546871	14811	163	157	20139	MIF,SON,ALB,NOP58,SYNCRIP,VIM,IQGAP1,GYS1,GTF3C1,PPP1CB,VTN,CAD,TCERG1,PSMB2,PUF60,EIF4A3,PRDX4,MRPL15,RPS26,HDLBP,UBR2,MAT1A,EIF5A,PRDX6,NOP56,DDX18,RPS7,RPS8,DDX56,SERPINH1,PFN1,KRT6A,SRP14,RPS6,HNRNPM,HIST1H2BN,EIF4A1,HNRNPA2B1,HNRNPK,CKB,TUBB,FTSJ3,PDIA3,HNRNPA1,RPL23A,CKAP4,TCOF1,HNRNPU,SFPQ,RAN,NAT10,SMARCA4,EEF2,TOP1,KRT78,C1QBP,NCL,DDX3X,RBM39,AP3D1,SNRPE,PRDX2,RPS24,RPL12,SERBP1,SNW1,TTF…
GO:MF	ribonucleoside triphosphate phosphatase activity	GO:0017111	TRUE	8.16554792547044e-12	11.088014667874736	705	163	31	20139	EIF4A3,DDX18,DDX56,EIF4A1,TUBB,RAN,EEF2,DDX3X,DDX5,PSMC5,DHX16,ABCE1,GTPBP4,HSPA5,CCT3,ABCF1,EIF5B,DDX17,HSPD1,CHD4,HSPA9,TSR1,CCT2,TUBB2B,HSPA1B,SNRNP200,DHX9,DHX15,DDX50,RABL6,ATAD5
GO:MF	ATP hydrolysis activity	GO:0016887	FALSE	2.6793079598265208e-11	10.571977365687548	371	163	23	20139	EIF4A3,DDX18,DDX56,EIF4A1,DDX3X,DDX5,PSMC5,DHX16,ABCE1,HSPA5,CCT3,ABCF1,DDX17,HSPD1,CHD4,HSPA9,CCT2,HSPA1B,SNRNP200,DHX9,DHX15,DDX50,ATAD5
GO:MF	ribonucleoprotein complex binding	GO:0043021	FALSE	4.607349988044993e-11	10.33654879619025	174	163	17	20139	EIF4A3,EIF5A,HNRNPU,EEF2,C1QBP,DDX3X,RBM39,SERBP1,DDX5,RPSA,ABCE1,GTPBP4,HSPA5,ABCF1,NPM1,DDX17,DHX9
GO:MF	pyrophosphatase activity	GO:0016462	FALSE	7.829246946924218e-11	10.106280008379262	767	163	31	20139	EIF4A3,DDX18,DDX56,EIF4A1,TUBB,RAN,EEF2,DDX3X,DDX5,PSMC5,DHX16,ABCE1,GTPBP4,HSPA5,CCT3,ABCF1,EIF5B,DDX17,HSPD1,CHD4,HSPA9,TSR1,CCT2,TUBB2B,HSPA1B,SNRNP200,DHX9,DHX15,DDX50,RABL6,ATAD5
GO:MF	hydrolase activity, acting on acid anhydrides, in phosphorus-containing anhydrides	GO:0016818	FALSE	8.105078890299268e-11	10.091242753615601	768	163	31	20139	EIF4A3,DDX18,DDX56,EIF4A1,TUBB,RAN,EEF2,DDX3X,DDX5,PSMC5,DHX16,ABCE1,GTPBP4,HSPA5,CCT3,ABCF1,EIF5B,DDX17,HSPD1,CHD4,HSPA9,TSR1,CCT2,TUBB2B,HSPA1B,SNRNP200,DHX9,DHX15,DDX50,RABL6,ATAD5
GO:MF	hydrolase activity, acting on acid anhydrides	GO:0016817	FALSE	8.105078890299268e-11	10.091242753615601	768	163	31	20139	EIF4A3,DDX18,DDX56,EIF4A1,TUBB,RAN,EEF2,DDX3X,DDX5,PSMC5,DHX16,ABCE1,GTPBP4,HSPA5,CCT3,ABCF1,EIF5B,DDX17,HSPD1,CHD4,HSPA9,TSR1,CCT2,TUBB2B,HSPA1B,SNRNP200,DHX9,DHX15,DDX50,RABL6,ATAD5
GO:MF	ATP-dependent activity	GO:0140657	FALSE	8.692834877524063e-11	10.060838569823945	569	163	27	20139	EIF4A3,DDX18,DDX56,EIF4A1,SMARCA4,DDX3X,DDX5,PSMC5,HSPH1,DHX16,ABCE1,HSPA5,HSPA4,MYH9,CCT3,ABCF1,DDX17,HSPD1,CHD4,HSPA9,CCT2,HSPA1B,SNRNP200,DHX9,DHX15,DDX50,ATAD5
GO:MF	cell adhesion molecule binding	GO:0050839	FALSE	4.1216332528470794e-10	9.384930654805919	559	163	26	20139	IQGAP1,VTN,PUF60,RPS26,HDLBP,PRDX6,NOP56,PFN1,HNRNPK,RPL23A,RAN,EEF2,DDX3X,SERBP1,UNC45A,PAICS,RPSA,ENO1,HSPA5,MYH9,RPS2,ALDOA,EEF1G,PKM,FASN,EZR
GO:MF	RNA helicase activity	GO:0003724	FALSE	6.689397106777491e-10	9.17461302199278	75	163	12	20139	EIF4A3,DDX18,DDX56,EIF4A1,DDX3X,DDX5,DHX16,DDX17,SNRNP200,DHX9,DHX15,DDX50
GO:MF	ATP-dependent activity, acting on RNA	GO:0008186	FALSE	9.280269467507426e-10	9.03243941316126	77	163	12	20139	EIF4A3,DDX18,DDX56,EIF4A1,DDX3X,DDX5,DHX16,DDX17,SNRNP200,DHX9,DHX15,DDX50
GO:MF	ligase activity, forming carbon-carbon bonds	GO:0016885	TRUE	1.3502378130262935e-9	8.86958973388333	7	163	6	20139	PCCB,MCCC1,ACACB,PCCA,PC,ACACA
GO:MF	helicase activity	GO:0004386	FALSE	3.706192678394779e-8	7.431072006229093	160	163	14	20139	EIF4A3,DDX18,DDX56,EIF4A1,SMARCA4,DDX3X,DDX5,DHX16,DDX17,CHD4,SNRNP200,DHX9,DHX15,DDX50
GO:MF	ATP-dependent protein folding chaperone	GO:0140662	TRUE	7.904851477704555e-8	7.102106285506511	31	163	8	20139	HSPH1,HSPA5,HSPA4,CCT3,HSPD1,HSPA9,CCT2,HSPA1B
GO:MF	protein-containing complex binding	GO:0044877	FALSE	7.959058827962965e-8	7.099138285275986	1761	163	42	20139	NOP58,VIM,IQGAP1,VTN,EIF4A3,EIF5A,SERPINH1,TUBB,RPL23A,HNRNPU,SFPQ,RAN,SMARCA4,EEF2,TOP1,C1QBP,DDX3X,RBM39,SERBP1,TTF1,NAP1L1,DDX5,DNMT1,RPSA,SHMT2,ABCE1,GTPBP4,HSPA5,PARP1,MYH9,PKM,ABCF1,NPM1,DDX17,HSPD1,CHD4,TUBA1A,DHX9,EZR,PLP1,FBL,RPS3
GO:MF	CoA carboxylase activity	GO:0016421	FALSE	1.4750259887008568e-7	6.831200327719756	6	163	5	20139	PCCB,MCCC1,ACACB,PCCA,ACACA
GO:MF	structural molecule activity	GO:0005198	TRUE	7.784440008118483e-7	6.108772623960533	1102	163	31	20139	VIM,VTN,MRPL15,RPS26,RPS7,RPS8,KRT6A,RPS6,HIST1H2BN,TUBB,RPL23A,KRT78,RPS24,RPL12,RPS15A,RPL31,FLG2,RPSA,RPL10,RPS2,RPL23,KRT2,RPL3,KRT10,ACTG1,KRT9,KRT1,TUBB2B,TUBA1A,PLP1,RPS3
GO:MF	translation regulator activity	GO:0045182	FALSE	7.977184654393542e-7	6.098150354864152	167	163	13	20139	EIF4A3,EIF5A,EIF4A1,EEF2,SERBP1,IGF2BP1,PRMT1,SHMT2,RPL10,TCEB3,EEF1G,ABCF1,EIF5B
GO:MF	mRNA 5'-UTR binding	GO:0048027	FALSE	8.753958097073497e-7	6.057795536572952	26	163	7	20139	SYNCRIP,RPS7,NCL,DDX3X,IGF2BP1,SHMT2,GNL3
GO:MF	ribosome binding	GO:0043022	FALSE	0.0000015041203155059112	5.8227174228731	113	163	11	20139	EIF5A,EEF2,C1QBP,DDX3X,SERBP1,RPSA,ABCE1,HSPA5,ABCF1,NPM1,DHX9
GO:MF	biotin binding	GO:0009374	FALSE	0.000015569334282107806	4.807729956718204	5	163	4	20139	MCCC1,ACACB,PCCA,PC
GO:MF	protein folding chaperone	GO:0044183	FALSE	0.000021015454791589877	4.677461207069883	60	163	8	20139	HSPH1,HSPA5,HSPA4,CCT3,HSPD1,HSPA9,CCT2,HSPA1B
GO:MF	enzyme binding	GO:0019899	FALSE	0.00003455687673877891	4.461465516089227	2075	163	41	20139	MIF,NOP58,IQGAP1,GYS1,PPP1CB,CAD,TCERG1,PRDX6,NOP56,RPS7,PFN1,RPS6,CKB,TUBB,HNRNPU,SFPQ,NAT10,SMARCA4,EEF2,NCL,SNW1,DDX5,PRMT1,ENO1,HSPA5,PARP1,RPS2,RPL23,NPM1,PHB,HSPD1,CHD4,HSPA9,ACTG1,CCT2,PCCA,HSPA1B,DHX9,EZR,FBL,RPS3
GO:MF	catalytic activity, acting on a nucleic acid	GO:0140640	FALSE	0.000037854672408178596	4.421880507819082	637	163	21	20139	EIF4A3,DDX18,DDX56,EIF4A1,FTSJ3,SMARCA4,TOP1,DDX3X,DDX5,DNMT1,DHX16,DDX17,CHD4,SNRNP200,DHX9,EXOSC10,FBL,DHX15,DDX50,RPS3,ATAD5
GO:MF	catalytic activity	GO:0003824	FALSE	0.00004150943672363591	4.381853159887597	5751	163	79	20139	MIF,GYS1,PPP1CB,CAD,EIF4A3,PRDX4,UBR2,MAT1A,PRDX6,DDX18,DDX56,EIF4A1,CKB,TUBB,FTSJ3,PDIA3,RAN,NAT10,NME1-NME2,SMARCA4,EEF2,TOP1,DDX3X,PRDX2,DDX5,PDIA6,DNMT1,RSBN1L,PSMC5,PRMT1,PPM1G,PAICS,SRPK1,DHX16,SHMT2,ABCE1,GTPBP4,NOL9,TAOK1,ENO1,HSPA5,PARP1,HSD17B10,PRPF4B,CTPS1,GAPDH,ALDOA,PKM,CCT3,ABCF1,EIF5B,DDX17,HSPD1,CHD4,HSPA9,PCCB,ACLY,ACTG1,TSR1,CCT2,TUBB2B,MCCC1,FASN,ACACB,TUBA1A,PCCA,HSPA1B,PC,AC…
GO:MF	transcription factor binding	GO:0008134	FALSE	0.0002736894335412123	3.5627419692808795	594	163	19	20139	NOP58,TCERG1,HNRNPU,SMARCA4,C1QBP,DDX3X,SNW1,DDX5,PSMC5,MYBBP1A,LYAR,ENO1,PARP1,RPL23,NPM1,CHD4,DHX9,FBL,RPS3
GO:MF	acetyl-CoA carboxylase activity	GO:0003989	FALSE	0.0003943715299551668	3.404094444718803	3	163	3	20139	PCCB,ACACB,ACACA
GO:MF	hydrolase activity	GO:0016787	FALSE	0.0004012082135753993	3.396630184639757	2446	163	43	20139	PPP1CB,CAD,EIF4A3,PRDX6,DDX18,DDX56,EIF4A1,TUBB,PDIA3,RAN,SMARCA4,EEF2,DDX3X,DDX5,PSMC5,PPM1G,DHX16,ABCE1,GTPBP4,HSPA5,CCT3,ABCF1,EIF5B,DDX17,HSPD1,CHD4,HSPA9,ACTG1,TSR1,CCT2,TUBB2B,FASN,TUBA1A,HSPA1B,SNRNP200,DHX9,CASP14,EXOSC10,DHX15,DDX50,RPS3,RABL6,ATAD5
GO:MF	structural constituent of ribosome	GO:0003735	FALSE	0.0006531154707771359	3.185010028697423	452	163	16	20139	MRPL15,RPS26,RPS7,RPS8,RPS6,RPL23A,RPS24,RPL12,RPS15A,RPL31,RPSA,RPL10,RPS2,RPL23,RPL3,RPS3
GO:MF	identical protein binding	GO:0042802	FALSE	0.000676506658791435	3.169727924325569	2143	163	39	20139	MIF,ALB,VIM,VTN,CAD,TCERG1,PUF60,PRDX4,MAT1A,PRDX6,HNRNPA2B1,HNRNPK,PDIA3,HNRNPA1,HNRNPU,SFPQ,NCL,CDC5L,PRMT1,NAF1,PAICS,SHMT2,LYAR,ENO1,PARP1,MYH9,CTPS1,GAPDH,ALDOA,PKM,NPM1,ACTG1,ACACB,TUBA1A,PC,ACACA,SNRNP200,EZR,PLP1
GO:MF	catalytic activity, acting on RNA	GO:0140098	FALSE	0.0010636305006443128	2.97320921734311	413	163	15	20139	EIF4A3,DDX18,DDX56,EIF4A1,FTSJ3,DDX3X,DDX5,DHX16,DDX17,SNRNP200,DHX9,EXOSC10,FBL,DHX15,DDX50
GO:MF	unfolded protein binding	GO:0051082	FALSE	0.0025581219098815256	2.592078762622319	111	163	8	20139	SERPINH1,HSPA5,CCT3,NPM1,HSPD1,HSPA9,CCT2,HSPA1B
GO:MF	structural constituent of cytoskeleton	GO:0005200	FALSE	0.0029245520931158444	2.533940638430847	113	163	8	20139	VIM,KRT6A,TUBB,KRT2,ACTG1,KRT9,TUBB2B,TUBA1A
GO:MF	transcription corepressor activity	GO:0003714	TRUE	0.003035310371172899	2.517796894178182	193	163	10	20139	TCERG1,HNRNPU,SMARCA4,C1QBP,SNW1,MYBBP1A,ENO1,PHB,CHD4,CREG1
GO:MF	protein domain specific binding	GO:0019904	FALSE	0.0037919005778844534	2.421143058212193	644	163	18	20139	VIM,IQGAP1,HNRNPM,HNRNPK,TUBB,HNRNPA1,RAN,TOP1,NCL,RBM39,DDX5,CDC5L,HSPA5,SRRM2,MYH9,GAPDH,HSPA1B,EZR
GO:MF	single-stranded RNA binding	GO:0003727	FALSE	0.004760517223177251	2.322345859260884	86	163	7	20139	EIF4A3,HNRNPA1,HNRNPU,DDX3X,PTBP1,DHX9,EXOSC10
GO:MF	translation regulator activity, nucleic acid binding	GO:0090079	FALSE	0.00486870139510977	2.3125868605809954	121	163	8	20139	EIF5A,EIF4A1,EEF2,SHMT2,TCEB3,EEF1G,ABCF1,EIF5B
GO:MF	RNA stem-loop binding	GO:0035613	FALSE	0.005286121713850942	2.2768628413849217	16	163	4	20139	EIF4A3,DDX56,DDX3X,DHX9
GO:MF	structural constituent of skin epidermis	GO:0030280	FALSE	0.007615451096662827	2.1183043663937187	36	163	5	20139	KRT6A,KRT78,KRT2,KRT10,KRT1
GO:MF	translation factor activity, RNA binding	GO:0008135	FALSE	0.010565487572480057	1.9761104564771048	97	163	7	20139	EIF5A,EIF4A1,EEF2,TCEB3,EEF1G,ABCF1,EIF5B
GO:MF	ligase activity	GO:0016874	FALSE	0.010846877973417315	1.9646952455968265	177	163	9	20139	CAD,PAICS,CTPS1,PCCB,MCCC1,ACACB,PCCA,PC,ACACA
GO:MF	transcription coregulator activity	GO:0003712	FALSE	0.01442175081929415	1.840982012501377	513	163	15	20139	TCERG1,HNRNPU,SMARCA4,C1QBP,SNW1,MYBBP1A,ENO1,PKM,NPM1,RRP1B,DDX17,PHB,CHD4,CREG1,DHX9
GO:MF	binding	GO:0005488	FALSE	0.01570227867380658	1.8040373193327044	18282	163	161	20139	MIF,SON,ALB,NOP58,SYNCRIP,VIM,IQGAP1,GYS1,GTF3C1,PPP1CB,VTN,CAD,TCERG1,PSMB2,PUF60,EIF4A3,PRDX4,MRPL15,RPS26,HDLBP,UBR2,MAT1A,EIF5A,PRDX6,NOP56,DDX18,RPS7,RPS8,DDX56,SERPINH1,PFN1,KRT6A,SRP14,RPS6,HNRNPM,HIST1H2BN,EIF4A1,HNRNPA2B1,HNRNPK,CKB,TUBB,FTSJ3,PDIA3,HNRNPA1,RPL23A,CKAP4,TCOF1,HNRNPU,SFPQ,RAN,NAT10,NME1-NME2,SMARCA4,EEF2,TOP1,KRT78,C1QBP,NCL,DDX3X,RBM39,AP3D1,SNRPE,PRDX2,RPS24,RPL12,SERBP…
GO:MF	double-stranded RNA binding	GO:0003725	FALSE	0.019517104961408207	1.7095846022702719	72	163	6	20139	VIM,EIF4A1,HNRNPU,HSPD1,DHX9,DHX15
GO:MF	mRNA 3'-UTR binding	GO:0003730	FALSE	0.02004508252502689	1.697992151431917	107	163	7	20139	RPS7,HNRNPA2B1,HNRNPU,SERBP1,IGF2BP1,DDX5,DDX17
GO:MF	peroxiredoxin activity	GO:0051920	TRUE	0.02143499670540648	1.6688765789051048	8	163	3	20139	PRDX4,PRDX6,PRDX2
GO:MF	ion binding	GO:0043167	FALSE	0.026637195768333642	1.574511497461259	6115	163	74	20139	ALB,IQGAP1,PPP1CB,CAD,EIF4A3,UBR2,MAT1A,DDX18,DDX56,PFN1,EIF4A1,CKB,TUBB,HNRNPU,RAN,NAT10,NME1-NME2,SMARCA4,EEF2,TOP1,DDX3X,DDX5,DNMT1,RSBN1L,PSMC5,PRMT1,PPM1G,FLG2,HSPH1,PAICS,SRPK1,DHX16,SHMT2,ABCE1,GTPBP4,NOL9,TAOK1,LYAR,ENO1,HSPA5,PARP1,HSPA4,MYH9,PRPF4B,CTPS1,PKM,CCT3,ABCF1,EIF5B,DDX17,GNL3,HSPD1,CHD4,HSPA9,PCCB,ACLY,ACTG1,TSR1,CCT2,TUBB2B,MCCC1,ACACB,TUBA1A,PCCA,HSPA1B,PC,ACACA,SNRNP200,RPA…
GO:MF	ubiquitin protein ligase binding	GO:0031625	TRUE	0.0312212713111316	1.5055494167070407	306	163	11	20139	PRDX6,CKB,TUBB,HSPA5,PARP1,RPL23,HSPD1,HSPA9,ACTG1,CCT2,HSPA1B
GO:MF	translation elongation factor activity	GO:0003746	TRUE	0.04076499229932072	1.3897126353800053	26	163	4	20139	EIF5A,EEF2,TCEB3,EEF1G
GO:MF	single-stranded DNA binding	GO:0003697	TRUE	0.04188698621193651	1.3779208862038659	120	163	7	20139	HNRNPA2B1,HNRNPA1,HNRNPU,TOP1,HSPD1,RPA1,DHX9
GO:MF	G-rich strand telomeric DNA binding	GO:0098505	TRUE	0.045387385948120945	1.3430648293963514	10	163	3	20139	HNRNPA2B1,HNRNPA1,RPA1
GO:MF	propionyl-CoA carboxylase activity	GO:0004658	FALSE	0.04932583539569683	1.3069255506846102	2	163	2	20139	PCCB,PCCA
GO:BP	ribosome biogenesis	GO:0042254	TRUE	2.914126278567813e-23	22.535491632766124	327	158	32	21010	NOP58,EIF4A3,NOP56,DDX18,RPS7,RPS8,DDX56,RPS6,FTSJ3,RPL23A,RAN,NAT10,C1QBP,DDX3X,RPS24,SERBP1,RPS15A,NAF1,MYBBP1A,RPSA,ABCE1,GTPBP4,RPL10,NOL9,LYAR,NPM1,EIF5B,RRP1B,DDX17,TSR1,EXOSC10,FBL
GO:BP	translation	GO:0006412	TRUE	1.2987013961929006e-20	19.886490692570632	760	158	41	21010	SYNCRIP,VIM,EIF4A3,MRPL15,RPS26,EIF5A,RPS7,RPS8,RPS6,EIF4A1,RPL23A,TCOF1,HNRNPU,NAT10,EEF2,C1QBP,NCL,DDX3X,RPS24,RPL12,SERBP1,IGF2BP1,RPS15A,RPL31,PRMT1,RPSA,SHMT2,ABCE1,RPL10,TCEB3,RPS2,RPL23,GAPDH,EEF1G,PKM,RPL3,ABCF1,NPM1,EIF5B,DHX9,RPS3
GO:BP	amide biosynthetic process	GO:0043604	FALSE	3.586850524213792e-20	19.445286721417634	927	158	44	21010	SYNCRIP,VIM,EIF4A3,MRPL15,RPS26,EIF5A,RPS7,RPS8,RPS6,EIF4A1,RPL23A,TCOF1,HNRNPU,NAT10,EEF2,C1QBP,NCL,DDX3X,RPS24,RPL12,SERBP1,IGF2BP1,RPS15A,RPL31,PRMT1,RPSA,SHMT2,ABCE1,RPL10,TCEB3,RPS2,RPL23,GAPDH,EEF1G,PKM,RPL3,ABCF1,NPM1,EIF5B,ACLY,ACACB,ACACA,DHX9,RPS3
GO:BP	peptide biosynthetic process	GO:0043043	FALSE	5.334856519903344e-20	19.272877256361756	789	158	41	21010	SYNCRIP,VIM,EIF4A3,MRPL15,RPS26,EIF5A,RPS7,RPS8,RPS6,EIF4A1,RPL23A,TCOF1,HNRNPU,NAT10,EEF2,C1QBP,NCL,DDX3X,RPS24,RPL12,SERBP1,IGF2BP1,RPS15A,RPL31,PRMT1,RPSA,SHMT2,ABCE1,RPL10,TCEB3,RPS2,RPL23,GAPDH,EEF1G,PKM,RPL3,ABCF1,NPM1,EIF5B,DHX9,RPS3
GO:BP	peptide metabolic process	GO:0006518	FALSE	1.1677448184420478e-17	16.932652051102494	912	158	41	21010	SYNCRIP,VIM,EIF4A3,MRPL15,RPS26,EIF5A,RPS7,RPS8,RPS6,EIF4A1,RPL23A,TCOF1,HNRNPU,NAT10,EEF2,C1QBP,NCL,DDX3X,RPS24,RPL12,SERBP1,IGF2BP1,RPS15A,RPL31,PRMT1,RPSA,SHMT2,ABCE1,RPL10,TCEB3,RPS2,RPL23,GAPDH,EEF1G,PKM,RPL3,ABCF1,NPM1,EIF5B,DHX9,RPS3
GO:BP	cytoplasmic translation	GO:0002181	FALSE	2.0713969097943125e-17	16.683736675989415	154	158	21	21010	SYNCRIP,RPS26,RPS7,RPS8,RPS6,EIF4A1,RPL23A,HNRNPU,RPS24,RPL12,IGF2BP1,RPS15A,RPL31,RPSA,RPL10,RPS2,RPL23,PKM,RPL3,DHX9,RPS3
GO:BP	amide metabolic process	GO:0043603	FALSE	1.7394689427482782e-16	15.759583320933901	1210	158	45	21010	SYNCRIP,VIM,EIF4A3,MRPL15,RPS26,EIF5A,RPS7,RPS8,RPS6,EIF4A1,RPL23A,TCOF1,HNRNPU,NAT10,EEF2,C1QBP,NCL,DDX3X,RPS24,RPL12,SERBP1,IGF2BP1,RPS15A,RPL31,PRMT1,RPSA,SHMT2,ABCE1,RPL10,TCEB3,RPS2,RPL23,GAPDH,EEF1G,PKM,RPL3,ABCF1,NPM1,EIF5B,ACLY,MCCC1,ACACB,ACACA,DHX9,RPS3
GO:BP	organic substance biosynthetic process	GO:1901576	FALSE	2.620665479570578e-16	15.581588411960114	10632	158	134	21010	MIF,SON,NOP58,SYNCRIP,VIM,IQGAP1,GYS1,GTF3C1,PPP1CB,CAD,TCERG1,PUF60,EIF4A3,PRDX4,MRPL15,RPS26,UBR2,MAT1A,EIF5A,PRDX6,NOP56,DDX18,RPS7,RPS8,DDX56,SERPINH1,PFN1,RPS6,HNRNPM,EIF4A1,HNRNPA2B1,HNRNPK,CKB,FTSJ3,PDIA3,HNRNPA1,RPL23A,TCOF1,HNRNPU,SFPQ,RAN,NAT10,NME1-NME2,SMARCA4,EEF2,TOP1,C1QBP,NCL,DDX3X,RBM39,AP3D1,SNRPE,PRDX2,RPS24,RPL12,SERBP1,SNW1,TTF1,IGF2BP1,DDX5,PDIA6,RPS15A,CDC5L,DNMT1,RPL31,PSM…
GO:BP	rRNA metabolic process	GO:0016072	FALSE	3.9899190540786806e-16	15.39903591502091	261	158	24	21010	NOP58,GTF3C1,EIF4A3,NOP56,DDX18,RPS7,RPS8,DDX56,RPS6,FTSJ3,TCOF1,NAT10,SMARCA4,NCL,RPS24,NAF1,GTPBP4,NOL9,LYAR,RRP1B,DDX17,TSR1,EXOSC10,FBL
GO:BP	biosynthetic process	GO:0009058	FALSE	4.402226942728419e-16	15.356327572542748	10682	158	134	21010	MIF,SON,NOP58,SYNCRIP,VIM,IQGAP1,GYS1,GTF3C1,PPP1CB,CAD,TCERG1,PUF60,EIF4A3,PRDX4,MRPL15,RPS26,UBR2,MAT1A,EIF5A,PRDX6,NOP56,DDX18,RPS7,RPS8,DDX56,SERPINH1,PFN1,RPS6,HNRNPM,EIF4A1,HNRNPA2B1,HNRNPK,CKB,FTSJ3,PDIA3,HNRNPA1,RPL23A,TCOF1,HNRNPU,SFPQ,RAN,NAT10,NME1-NME2,SMARCA4,EEF2,TOP1,C1QBP,NCL,DDX3X,RBM39,AP3D1,SNRPE,PRDX2,RPS24,RPL12,SERBP1,SNW1,TTF1,IGF2BP1,DDX5,PDIA6,RPS15A,CDC5L,DNMT1,RPL31,PSM…
GO:BP	primary metabolic process	GO:0044238	FALSE	5.105375291979712e-16	15.291972327769978	12666	158	145	21010	MIF,SON,NOP58,SYNCRIP,VIM,IQGAP1,GYS1,GTF3C1,PPP1CB,VTN,CAD,TCERG1,PSMB2,PUF60,EIF4A3,PRDX4,MRPL15,RPS26,HDLBP,UBR2,MAT1A,EIF5A,PRDX6,NOP56,DDX18,RPS7,RPS8,DDX56,SERPINH1,PFN1,RPS6,HNRNPM,EIF4A1,HNRNPA2B1,HNRNPK,FTSJ3,PDIA3,HNRNPA1,RPL23A,TCOF1,HNRNPU,SFPQ,RAN,NAT10,NME1-NME2,SMARCA4,EEF2,TOP1,C1QBP,NCL,DDX3X,RBM39,AP3D1,SNRPE,PRDX2,RPS24,RPL12,SERBP1,SNW1,TTF1,IGF2BP1,NAP1L1,DDX5,PDIA6,RPS15A,CD…
GO:BP	cellular biosynthetic process	GO:0044249	FALSE	5.665746858179075e-16	15.24674283337222	10544	158	133	21010	MIF,SON,NOP58,SYNCRIP,VIM,IQGAP1,GYS1,GTF3C1,PPP1CB,CAD,TCERG1,PUF60,EIF4A3,PRDX4,MRPL15,RPS26,UBR2,MAT1A,EIF5A,PRDX6,NOP56,DDX18,RPS7,RPS8,DDX56,SERPINH1,PFN1,RPS6,HNRNPM,EIF4A1,HNRNPA2B1,HNRNPK,FTSJ3,PDIA3,HNRNPA1,RPL23A,TCOF1,HNRNPU,SFPQ,RAN,NAT10,NME1-NME2,SMARCA4,EEF2,TOP1,C1QBP,NCL,DDX3X,RBM39,AP3D1,SNRPE,PRDX2,RPS24,RPL12,SERBP1,SNW1,TTF1,IGF2BP1,DDX5,PDIA6,RPS15A,CDC5L,DNMT1,RPL31,PSMC5,P…
GO:BP	nitrogen compound metabolic process	GO:0006807	FALSE	6.544636796568953e-16	15.184114450201498	12114	158	142	21010	MIF,SON,NOP58,SYNCRIP,VIM,IQGAP1,GTF3C1,PPP1CB,VTN,CAD,TCERG1,PSMB2,PUF60,EIF4A3,PRDX4,MRPL15,RPS26,UBR2,MAT1A,EIF5A,PRDX6,NOP56,DDX18,RPS7,RPS8,DDX56,SERPINH1,PFN1,RPS6,HNRNPM,EIF4A1,HNRNPA2B1,HNRNPK,CKB,FTSJ3,PDIA3,HNRNPA1,RPL23A,TCOF1,HNRNPU,SFPQ,RAN,NAT10,NME1-NME2,SMARCA4,EEF2,TOP1,C1QBP,NCL,DDX3X,RBM39,AP3D1,SNRPE,PRDX2,RPS24,RPL12,SERBP1,SNW1,TTF1,IGF2BP1,NAP1L1,DDX5,PDIA6,RPS15A,CDC5L,PSM…
GO:BP	organonitrogen compound biosynthetic process	GO:1901566	FALSE	1.0344408676582596e-14	13.985294330115416	1816	158	52	21010	SYNCRIP,VIM,CAD,EIF4A3,MRPL15,RPS26,EIF5A,RPS7,RPS8,RPS6,EIF4A1,CKB,RPL23A,TCOF1,HNRNPU,NAT10,NME1-NME2,EEF2,C1QBP,NCL,DDX3X,RPS24,RPL12,SERBP1,IGF2BP1,RPS15A,RPL31,PRMT1,PAICS,RPSA,SHMT2,ABCE1,RPL10,ENO1,PARP1,TCEB3,RPS2,RPL23,CTPS1,GAPDH,ALDOA,EEF1G,PKM,RPL3,ABCF1,NPM1,EIF5B,ACLY,ACACB,ACACA,DHX9,RPS3
GO:BP	organonitrogen compound metabolic process	GO:1901564	FALSE	1.642480876873301e-14	13.784499678155852	6362	158	100	21010	MIF,SYNCRIP,VIM,IQGAP1,PPP1CB,VTN,CAD,PSMB2,EIF4A3,PRDX4,MRPL15,RPS26,UBR2,MAT1A,EIF5A,RPS7,RPS8,SERPINH1,RPS6,EIF4A1,CKB,PDIA3,HNRNPA1,RPL23A,TCOF1,HNRNPU,RAN,NAT10,NME1-NME2,EEF2,TOP1,C1QBP,NCL,DDX3X,RPS24,RPL12,SERBP1,IGF2BP1,PDIA6,RPS15A,PSMA5,RPL31,PSMC5,PRMT1,PPM1G,DENND3,UNC45A,HSPH1,PAICS,MYBBP1A,SRPK1,RPSA,PTBP1,SHMT2,ABCE1,GTPBP4,RPL10,TAOK1,ENO1,HSPA5,PARP1,HSPA4,TCEB3,MYH9,RPS2,HSD17B…
GO:BP	gene expression	GO:0010467	FALSE	5.753785752022072e-14	13.24004631353483	9182	158	121	21010	MIF,SON,NOP58,SYNCRIP,VIM,IQGAP1,GTF3C1,PPP1CB,TCERG1,PUF60,EIF4A3,PRDX4,MRPL15,RPS26,UBR2,EIF5A,PRDX6,NOP56,DDX18,RPS7,RPS8,DDX56,SERPINH1,PFN1,RPS6,HNRNPM,EIF4A1,HNRNPA2B1,HNRNPK,FTSJ3,PDIA3,HNRNPA1,RPL23A,TCOF1,HNRNPU,SFPQ,RAN,NAT10,SMARCA4,EEF2,TOP1,C1QBP,NCL,DDX3X,RBM39,AP3D1,SNRPE,PRDX2,RPS24,RPL12,SERBP1,SNW1,TTF1,IGF2BP1,DDX5,PDIA6,RPS15A,CDC5L,DNMT1,RPL31,PSMC5,PRMT1,UNC45A,NAF1,HSPH1,MY…
GO:BP	cellular nitrogen compound biosynthetic process	GO:0044271	FALSE	1.1043109461755833e-13	12.95690862298889	4860	158	85	21010	SYNCRIP,VIM,GTF3C1,CAD,TCERG1,EIF4A3,MRPL15,RPS26,EIF5A,RPS7,RPS8,DDX56,PFN1,RPS6,EIF4A1,HNRNPA2B1,HNRNPK,HNRNPA1,RPL23A,TCOF1,HNRNPU,SFPQ,NAT10,NME1-NME2,SMARCA4,EEF2,C1QBP,NCL,DDX3X,AP3D1,PRDX2,RPS24,RPL12,SERBP1,SNW1,TTF1,IGF2BP1,DDX5,RPS15A,CDC5L,DNMT1,RPL31,PSMC5,PRMT1,NAF1,PAICS,MYBBP1A,RPSA,PTBP1,SHMT2,ABCE1,RPL10,LYAR,ENO1,HSPA5,PARP1,TCEB3,RPS2,RPL23,CTPS1,GAPDH,ALDOA,EEF1G,PKM,RPL3,CCT3…
GO:BP	organic substance metabolic process	GO:0071704	FALSE	2.2449669345133753e-13	12.648790051214839	13917	158	148	21010	MIF,SON,NOP58,SYNCRIP,VIM,IQGAP1,GYS1,GTF3C1,PPP1CB,VTN,CAD,TCERG1,PSMB2,PUF60,EIF4A3,PRDX4,MRPL15,RPS26,HDLBP,UBR2,MAT1A,EIF5A,PRDX6,NOP56,DDX18,RPS7,RPS8,DDX56,SERPINH1,PFN1,RPS6,HNRNPM,EIF4A1,HNRNPA2B1,HNRNPK,CKB,FTSJ3,PDIA3,HNRNPA1,RPL23A,TCOF1,HNRNPU,SFPQ,RAN,NAT10,NME1-NME2,SMARCA4,EEF2,TOP1,C1QBP,NCL,DDX3X,RBM39,AP3D1,SNRPE,PRDX2,RPS24,RPL12,SERBP1,SNW1,TTF1,IGF2BP1,NAP1L1,DDX5,PDIA6,RPS15…
GO:BP	cellular nitrogen compound metabolic process	GO:0034641	FALSE	2.3717831184095005e-13	12.624925026431026	8625	158	116	21010	SON,NOP58,SYNCRIP,VIM,GTF3C1,CAD,TCERG1,PUF60,EIF4A3,MRPL15,RPS26,UBR2,EIF5A,PRDX6,NOP56,DDX18,RPS7,RPS8,DDX56,PFN1,RPS6,HNRNPM,EIF4A1,HNRNPA2B1,HNRNPK,FTSJ3,HNRNPA1,RPL23A,TCOF1,HNRNPU,SFPQ,RAN,NAT10,NME1-NME2,SMARCA4,EEF2,TOP1,C1QBP,NCL,DDX3X,RBM39,AP3D1,SNRPE,PRDX2,RPS24,RPL12,SERBP1,SNW1,TTF1,IGF2BP1,NAP1L1,DDX5,RPS15A,CDC5L,DNMT1,RPL31,PSMC5,PRMT1,NAF1,PAICS,MYBBP1A,LUC7L3,SRPK1,RPSA,DHX16,P…
GO:BP	regulation of mRNA processing	GO:0050684	TRUE	2.7210531054166566e-13	12.565262982231873	131	158	17	21010	SON,PUF60,PRDX6,HNRNPA2B1,HNRNPK,HNRNPA1,HNRNPU,C1QBP,NCL,RBM39,SNW1,DDX5,SRPK1,PTBP1,NPM1,DDX17,DHX9
GO:BP	regulation of mRNA splicing, via spliceosome	GO:0048024	FALSE	2.924459777109526e-13	12.533954347526684	109	158	16	21010	SON,PUF60,PRDX6,HNRNPA2B1,HNRNPK,HNRNPA1,HNRNPU,C1QBP,NCL,RBM39,SNW1,DDX5,SRPK1,PTBP1,NPM1,DDX17
GO:BP	macromolecule biosynthetic process	GO:0009059	FALSE	4.695057535283216e-13	12.328359081331222	9681	158	123	21010	MIF,SON,NOP58,SYNCRIP,VIM,IQGAP1,GYS1,GTF3C1,PPP1CB,TCERG1,PUF60,EIF4A3,PRDX4,MRPL15,RPS26,UBR2,EIF5A,PRDX6,NOP56,DDX18,RPS7,RPS8,DDX56,SERPINH1,PFN1,RPS6,HNRNPM,EIF4A1,HNRNPA2B1,HNRNPK,FTSJ3,PDIA3,HNRNPA1,RPL23A,TCOF1,HNRNPU,SFPQ,RAN,NAT10,SMARCA4,EEF2,TOP1,C1QBP,NCL,DDX3X,RBM39,AP3D1,SNRPE,PRDX2,RPS24,RPL12,SERBP1,SNW1,TTF1,IGF2BP1,DDX5,PDIA6,RPS15A,CDC5L,DNMT1,RPL31,PSMC5,PRMT1,UNC45A,NAF1,HSP…
GO:BP	ncRNA metabolic process	GO:0034660	FALSE	6.421335748282208e-13	12.192374621811558	621	158	30	21010	NOP58,GTF3C1,EIF4A3,NOP56,DDX18,RPS7,RPS8,DDX56,RPS6,HNRNPA2B1,FTSJ3,TCOF1,NAT10,SMARCA4,NCL,DDX3X,RPS24,DDX5,NAF1,GTPBP4,NOL9,LYAR,HSD17B10,RRP1B,DDX17,GNL3,TSR1,EXOSC10,FBL,WDR6
GO:BP	rRNA processing	GO:0006364	FALSE	7.179703261293457e-13	12.143893504872732	222	158	20	21010	NOP58,EIF4A3,NOP56,DDX18,RPS7,RPS8,DDX56,RPS6,FTSJ3,NAT10,RPS24,NAF1,GTPBP4,NOL9,LYAR,RRP1B,DDX17,TSR1,EXOSC10,FBL
GO:BP	regulation of mRNA metabolic process	GO:1903311	FALSE	1.4853650629315645e-12	11.828166795281385	298	158	22	21010	SON,SYNCRIP,VIM,PUF60,EIF4A3,PRDX6,HNRNPA2B1,HNRNPK,HNRNPA1,HNRNPU,C1QBP,NCL,RBM39,SERBP1,SNW1,IGF2BP1,DDX5,SRPK1,PTBP1,NPM1,DDX17,DHX9
GO:BP	regulation of RNA splicing	GO:0043484	FALSE	4.47764115072217e-12	11.348950714800308	182	158	18	21010	SON,PUF60,RPS26,PRDX6,HNRNPA2B1,HNRNPK,HNRNPA1,HNRNPU,C1QBP,NCL,RBM39,SNW1,DDX5,SRPK1,PTBP1,NPM1,RRP1B,DDX17
GO:BP	ncRNA processing	GO:0034470	FALSE	4.522754516947482e-12	11.344596983960551	434	158	25	21010	NOP58,EIF4A3,NOP56,DDX18,RPS7,RPS8,DDX56,RPS6,HNRNPA2B1,FTSJ3,NAT10,DDX3X,RPS24,DDX5,NAF1,GTPBP4,NOL9,LYAR,HSD17B10,RRP1B,DDX17,TSR1,EXOSC10,FBL,WDR6
GO:BP	metabolic process	GO:0008152	FALSE	1.2873693592524631e-11	10.89029683175042	14362	158	148	21010	MIF,SON,NOP58,SYNCRIP,VIM,IQGAP1,GYS1,GTF3C1,PPP1CB,VTN,CAD,TCERG1,PSMB2,PUF60,EIF4A3,PRDX4,MRPL15,RPS26,HDLBP,UBR2,MAT1A,EIF5A,PRDX6,NOP56,DDX18,RPS7,RPS8,DDX56,SERPINH1,PFN1,RPS6,HNRNPM,EIF4A1,HNRNPA2B1,HNRNPK,CKB,FTSJ3,PDIA3,HNRNPA1,RPL23A,TCOF1,HNRNPU,SFPQ,RAN,NAT10,NME1-NME2,SMARCA4,EEF2,TOP1,C1QBP,NCL,DDX3X,RBM39,AP3D1,SNRPE,PRDX2,RPS24,RPL12,SERBP1,SNW1,TTF1,IGF2BP1,NAP1L1,DDX5,PDIA6,RPS15…
GO:BP	protein metabolic process	GO:0019538	FALSE	1.6953014160155087e-11	10.770753075233978	5373	158	86	21010	MIF,SYNCRIP,VIM,IQGAP1,PPP1CB,VTN,CAD,PSMB2,EIF4A3,PRDX4,MRPL15,RPS26,UBR2,EIF5A,RPS7,RPS8,SERPINH1,RPS6,EIF4A1,PDIA3,HNRNPA1,RPL23A,TCOF1,HNRNPU,NAT10,EEF2,TOP1,C1QBP,NCL,DDX3X,RPS24,RPL12,SERBP1,IGF2BP1,PDIA6,RPS15A,PSMA5,RPL31,PSMC5,PRMT1,PPM1G,DENND3,UNC45A,HSPH1,MYBBP1A,SRPK1,RPSA,PTBP1,SHMT2,ABCE1,GTPBP4,RPL10,TAOK1,ENO1,HSPA5,PARP1,HSPA4,TCEB3,MYH9,RPS2,RPL23,PRPF4B,GAPDH,KRT2,EEF1G,PKM,RP…
GO:BP	regulation of translation	GO:0006417	FALSE	1.950769654510339e-11	10.709794008760815	419	158	24	21010	SYNCRIP,VIM,EIF4A3,EIF5A,TCOF1,HNRNPU,NAT10,EEF2,C1QBP,NCL,DDX3X,SERBP1,IGF2BP1,PRMT1,SHMT2,ABCE1,RPL10,GAPDH,PKM,ABCF1,NPM1,EIF5B,DHX9,RPS3
GO:BP	cellular metabolic process	GO:0044237	FALSE	3.563442947585673e-11	10.448130190072323	12909	158	140	21010	MIF,SON,NOP58,SYNCRIP,VIM,IQGAP1,GYS1,GTF3C1,PPP1CB,VTN,CAD,TCERG1,PUF60,EIF4A3,PRDX4,MRPL15,RPS26,UBR2,MAT1A,EIF5A,PRDX6,NOP56,DDX18,RPS7,RPS8,DDX56,SERPINH1,PFN1,RPS6,HNRNPM,EIF4A1,HNRNPA2B1,HNRNPK,CKB,FTSJ3,PDIA3,HNRNPA1,RPL23A,TCOF1,HNRNPU,SFPQ,RAN,NAT10,NME1-NME2,SMARCA4,EEF2,TOP1,C1QBP,NCL,DDX3X,RBM39,AP3D1,SNRPE,PRDX2,RPS24,RPL12,SERBP1,SNW1,TTF1,IGF2BP1,NAP1L1,DDX5,PDIA6,RPS15A,CDC5L,DNMT…
GO:BP	macromolecule metabolic process	GO:0043170	FALSE	1.0278806219252299e-10	9.988057321381278	12326	158	136	21010	MIF,SON,NOP58,SYNCRIP,VIM,IQGAP1,GYS1,GTF3C1,PPP1CB,VTN,CAD,TCERG1,PSMB2,PUF60,EIF4A3,PRDX4,MRPL15,RPS26,UBR2,EIF5A,PRDX6,NOP56,DDX18,RPS7,RPS8,DDX56,SERPINH1,PFN1,RPS6,HNRNPM,EIF4A1,HNRNPA2B1,HNRNPK,FTSJ3,PDIA3,HNRNPA1,RPL23A,TCOF1,HNRNPU,SFPQ,RAN,NAT10,SMARCA4,EEF2,TOP1,C1QBP,NCL,DDX3X,RBM39,AP3D1,SNRPE,PRDX2,RPS24,RPL12,SERBP1,SNW1,TTF1,IGF2BP1,NAP1L1,DDX5,PDIA6,RPS15A,CDC5L,PSMA5,DNMT1,RPL31,…
GO:BP	regulation of amide metabolic process	GO:0034248	FALSE	3.467629028029844e-10	9.459967370162731	478	158	24	21010	SYNCRIP,VIM,EIF4A3,EIF5A,TCOF1,HNRNPU,NAT10,EEF2,C1QBP,NCL,DDX3X,SERBP1,IGF2BP1,PRMT1,SHMT2,ABCE1,RPL10,GAPDH,PKM,ABCF1,NPM1,EIF5B,DHX9,RPS3
GO:BP	positive regulation of translation	GO:0045727	FALSE	4.3866873345504675e-10	9.357863319257818	143	158	15	21010	SYNCRIP,VIM,EIF4A3,EIF5A,HNRNPU,NAT10,EEF2,C1QBP,DDX3X,IGF2BP1,PRMT1,PKM,ABCF1,NPM1,DHX9
GO:BP	positive regulation of macromolecule biosynthetic process	GO:0010557	FALSE	1.6008157865267709e-9	8.795658641533477	2599	158	54	21010	MIF,SYNCRIP,VIM,TCERG1,EIF4A3,EIF5A,PRDX6,RPS7,HNRNPK,HNRNPA1,HNRNPU,SFPQ,NAT10,SMARCA4,EEF2,C1QBP,NCL,DDX3X,AP3D1,SNW1,IGF2BP1,CDC5L,DNMT1,PSMC5,PRMT1,NAF1,HSPH1,MYBBP1A,PTBP1,LYAR,ENO1,HSPA5,PARP1,MYH9,RPL23,GAPDH,PKM,CCT3,ABCF1,NPM1,RRP1B,DDX17,GNL3,PHB,HSPD1,CHD4,ACTG1,CCT2,HSPA1B,DHX9,EZR,PLP1,RPS3,ATAD5
GO:BP	ribosomal small subunit biogenesis	GO:0042274	FALSE	1.6516413233413878e-9	8.782084259803977	103	158	13	21010	NOP58,NOP56,RPS7,RPS8,RPS6,NAT10,RPS24,RPS15A,RPSA,NPM1,TSR1,EXOSC10,FBL
GO:BP	nucleobase-containing compound metabolic process	GO:0006139	FALSE	2.2248559050238153e-9	8.652698111280577	7990	158	104	21010	SON,NOP58,SYNCRIP,VIM,GTF3C1,CAD,TCERG1,PUF60,EIF4A3,RPS26,UBR2,EIF5A,PRDX6,NOP56,DDX18,RPS7,RPS8,DDX56,PFN1,RPS6,HNRNPM,EIF4A1,HNRNPA2B1,HNRNPK,FTSJ3,HNRNPA1,RPL23A,TCOF1,HNRNPU,SFPQ,RAN,NAT10,NME1-NME2,SMARCA4,TOP1,C1QBP,NCL,DDX3X,RBM39,AP3D1,SNRPE,PRDX2,RPS24,SERBP1,SNW1,TTF1,IGF2BP1,NAP1L1,DDX5,CDC5L,DNMT1,PSMC5,PRMT1,NAF1,PAICS,MYBBP1A,LUC7L3,SRPK1,DHX16,PTBP1,SHMT2,ABCE1,GTPBP4,RPL10,NOL9,T…
GO:BP	heterocycle metabolic process	GO:0046483	FALSE	3.2125231552121057e-9	8.493153733343263	8160	158	105	21010	SON,NOP58,SYNCRIP,VIM,GTF3C1,CAD,TCERG1,PUF60,EIF4A3,RPS26,UBR2,EIF5A,PRDX6,NOP56,DDX18,RPS7,RPS8,DDX56,PFN1,RPS6,HNRNPM,EIF4A1,HNRNPA2B1,HNRNPK,FTSJ3,HNRNPA1,RPL23A,TCOF1,HNRNPU,SFPQ,RAN,NAT10,NME1-NME2,SMARCA4,TOP1,C1QBP,NCL,DDX3X,RBM39,AP3D1,SNRPE,PRDX2,RPS24,SERBP1,SNW1,TTF1,IGF2BP1,NAP1L1,DDX5,CDC5L,DNMT1,PSMC5,PRMT1,NAF1,PAICS,MYBBP1A,LUC7L3,SRPK1,DHX16,PTBP1,SHMT2,ABCE1,GTPBP4,RPL10,NOL9,T…
GO:BP	positive regulation of amide metabolic process	GO:0034250	FALSE	5.5918919135823445e-9	8.25244123171667	170	158	15	21010	SYNCRIP,VIM,EIF4A3,EIF5A,HNRNPU,NAT10,EEF2,C1QBP,DDX3X,IGF2BP1,PRMT1,PKM,ABCF1,NPM1,DHX9
GO:BP	positive regulation of cellular biosynthetic process	GO:0031328	FALSE	5.793526288350266e-9	8.23705701806669	2684	158	54	21010	MIF,SYNCRIP,VIM,TCERG1,EIF4A3,EIF5A,PRDX6,RPS7,HNRNPK,HNRNPA1,HNRNPU,SFPQ,NAT10,SMARCA4,EEF2,C1QBP,NCL,DDX3X,AP3D1,SNW1,IGF2BP1,CDC5L,DNMT1,PSMC5,PRMT1,NAF1,HSPH1,MYBBP1A,PTBP1,LYAR,ENO1,HSPA5,PARP1,MYH9,RPL23,GAPDH,PKM,CCT3,ABCF1,NPM1,RRP1B,DDX17,GNL3,PHB,HSPD1,CHD4,ACTG1,CCT2,HSPA1B,DHX9,EZR,PLP1,RPS3,ATAD5
GO:BP	positive regulation of biosynthetic process	GO:0009891	FALSE	7.662204656592346e-9	8.115646252243083	2703	158	54	21010	MIF,SYNCRIP,VIM,TCERG1,EIF4A3,EIF5A,PRDX6,RPS7,HNRNPK,HNRNPA1,HNRNPU,SFPQ,NAT10,SMARCA4,EEF2,C1QBP,NCL,DDX3X,AP3D1,SNW1,IGF2BP1,CDC5L,DNMT1,PSMC5,PRMT1,NAF1,HSPH1,MYBBP1A,PTBP1,LYAR,ENO1,HSPA5,PARP1,MYH9,RPL23,GAPDH,PKM,CCT3,ABCF1,NPM1,RRP1B,DDX17,GNL3,PHB,HSPD1,CHD4,ACTG1,CCT2,HSPA1B,DHX9,EZR,PLP1,RPS3,ATAD5
GO:BP	organic cyclic compound metabolic process	GO:1901360	FALSE	1.3050526220914714e-8	7.884371976430528	8451	158	106	21010	SON,NOP58,SYNCRIP,VIM,GTF3C1,CAD,TCERG1,PUF60,EIF4A3,RPS26,HDLBP,UBR2,EIF5A,PRDX6,NOP56,DDX18,RPS7,RPS8,DDX56,PFN1,RPS6,HNRNPM,EIF4A1,HNRNPA2B1,HNRNPK,FTSJ3,HNRNPA1,RPL23A,TCOF1,HNRNPU,SFPQ,RAN,NAT10,NME1-NME2,SMARCA4,TOP1,C1QBP,NCL,DDX3X,RBM39,AP3D1,SNRPE,PRDX2,RPS24,SERBP1,SNW1,TTF1,IGF2BP1,NAP1L1,DDX5,CDC5L,DNMT1,PSMC5,PRMT1,NAF1,PAICS,MYBBP1A,LUC7L3,SRPK1,DHX16,PTBP1,SHMT2,ABCE1,GTPBP4,RPL10,…
GO:BP	cellular aromatic compound metabolic process	GO:0006725	FALSE	1.5768334003866394e-8	7.802214189432583	8212	158	104	21010	SON,NOP58,SYNCRIP,VIM,GTF3C1,CAD,TCERG1,PUF60,EIF4A3,RPS26,UBR2,EIF5A,PRDX6,NOP56,DDX18,RPS7,RPS8,DDX56,PFN1,RPS6,HNRNPM,EIF4A1,HNRNPA2B1,HNRNPK,FTSJ3,HNRNPA1,RPL23A,TCOF1,HNRNPU,SFPQ,RAN,NAT10,NME1-NME2,SMARCA4,TOP1,C1QBP,NCL,DDX3X,RBM39,AP3D1,SNRPE,PRDX2,RPS24,SERBP1,SNW1,TTF1,IGF2BP1,NAP1L1,DDX5,CDC5L,DNMT1,PSMC5,PRMT1,NAF1,PAICS,MYBBP1A,LUC7L3,SRPK1,DHX16,PTBP1,SHMT2,ABCE1,GTPBP4,RPL10,NOL9,T…
GO:BP	positive regulation of gene expression	GO:0010628	FALSE	1.8481182053237225e-8	7.7332702548269125	1183	158	34	21010	MIF,SYNCRIP,VIM,EIF4A3,EIF5A,PRDX6,RPS7,HNRNPU,NAT10,SMARCA4,EEF2,C1QBP,NCL,DDX3X,SNW1,IGF2BP1,DNMT1,PRMT1,ENO1,MYH9,RPL23,GAPDH,PKM,ABCF1,NPM1,PHB,HSPD1,ACTG1,HSPA1B,DHX9,EZR,PLP1,RPS3,ATAD5
GO:BP	regulation of macromolecule biosynthetic process	GO:0010556	FALSE	9.103810638264022e-8	7.040776784298335	5631	158	81	21010	MIF,SON,SYNCRIP,VIM,IQGAP1,PPP1CB,TCERG1,PUF60,EIF4A3,RPS26,UBR2,EIF5A,PRDX6,RPS7,DDX56,PFN1,HNRNPA2B1,HNRNPK,HNRNPA1,TCOF1,HNRNPU,SFPQ,RAN,NAT10,SMARCA4,EEF2,TOP1,C1QBP,NCL,DDX3X,RBM39,AP3D1,PRDX2,SERBP1,SNW1,IGF2BP1,DDX5,CDC5L,DNMT1,PSMC5,PRMT1,NAF1,HSPH1,MYBBP1A,SRPK1,PTBP1,SHMT2,ABCE1,RPL10,LYAR,ENO1,HSPA5,PARP1,TCEB3,MYH9,RPL23,GAPDH,PKM,CCT3,ABCF1,NPM1,EIF5B,RRP1B,DDX17,GNL3,PHB,HSPD1,CHD4,…
GO:BP	regulation of cellular biosynthetic process	GO:0031326	FALSE	2.979953209216875e-7	6.525790555097722	5757	158	81	21010	MIF,SON,SYNCRIP,VIM,IQGAP1,PPP1CB,TCERG1,PUF60,EIF4A3,RPS26,UBR2,EIF5A,PRDX6,RPS7,DDX56,PFN1,HNRNPA2B1,HNRNPK,HNRNPA1,TCOF1,HNRNPU,SFPQ,RAN,NAT10,SMARCA4,EEF2,TOP1,C1QBP,NCL,DDX3X,RBM39,AP3D1,PRDX2,SERBP1,SNW1,IGF2BP1,DDX5,CDC5L,DNMT1,PSMC5,PRMT1,NAF1,HSPH1,MYBBP1A,SRPK1,PTBP1,SHMT2,ABCE1,RPL10,LYAR,ENO1,HSPA5,PARP1,TCEB3,MYH9,RPL23,GAPDH,PKM,CCT3,ABCF1,NPM1,EIF5B,RRP1B,DDX17,GNL3,PHB,HSPD1,CHD4,…
GO:BP	DNA metabolic process	GO:0006259	TRUE	3.384883016462129e-7	6.470456336190917	1039	158	30	21010	SYNCRIP,UBR2,HNRNPA2B1,HNRNPA1,HNRNPU,SFPQ,RAN,NAT10,SMARCA4,TOP1,TTF1,NAP1L1,CDC5L,DNMT1,NAF1,GTPBP4,TAOK1,PARP1,CCT3,NPM1,GNL3,PHB,HSPD1,CHD4,CCT2,RPA1,DHX9,EXOSC10,RPS3,ATAD5
GO:BP	regulation of biosynthetic process	GO:0009889	FALSE	3.998691776460093e-7	6.3980820704704975	5789	158	81	21010	MIF,SON,SYNCRIP,VIM,IQGAP1,PPP1CB,TCERG1,PUF60,EIF4A3,RPS26,UBR2,EIF5A,PRDX6,RPS7,DDX56,PFN1,HNRNPA2B1,HNRNPK,HNRNPA1,TCOF1,HNRNPU,SFPQ,RAN,NAT10,SMARCA4,EEF2,TOP1,C1QBP,NCL,DDX3X,RBM39,AP3D1,PRDX2,SERBP1,SNW1,IGF2BP1,DDX5,CDC5L,DNMT1,PSMC5,PRMT1,NAF1,HSPH1,MYBBP1A,SRPK1,PTBP1,SHMT2,ABCE1,RPL10,LYAR,ENO1,HSPA5,PARP1,TCEB3,MYH9,RPL23,GAPDH,PKM,CCT3,ABCF1,NPM1,EIF5B,RRP1B,DDX17,GNL3,PHB,HSPD1,CHD4,…
GO:BP	positive regulation of macromolecule metabolic process	GO:0010604	FALSE	4.70085643026822e-7	6.3278230124778645	3483	158	59	21010	MIF,SYNCRIP,VIM,IQGAP1,VTN,TCERG1,EIF4A3,EIF5A,PRDX6,RPS7,HNRNPA2B1,HNRNPK,HNRNPA1,HNRNPU,SFPQ,NAT10,SMARCA4,EEF2,C1QBP,NCL,DDX3X,AP3D1,SNW1,IGF2BP1,CDC5L,DNMT1,PSMC5,PRMT1,NAF1,HSPH1,MYBBP1A,PTBP1,TAOK1,LYAR,ENO1,HSPA5,PARP1,MYH9,RPS2,RPL23,GAPDH,PKM,CCT3,ABCF1,NPM1,RRP1B,DDX17,GNL3,PHB,HSPD1,CHD4,ACTG1,CCT2,HSPA1B,DHX9,EZR,PLP1,RPS3,ATAD5
GO:BP	RNA localization	GO:0006403	TRUE	5.195638971310651e-7	6.28436103431475	196	158	14	21010	NOP58,EIF4A3,HNRNPA2B1,HNRNPA1,HNRNPU,RAN,IGF2BP1,NAF1,CCT3,NPM1,CCT2,DHX9,EXOSC10,FBL
GO:BP	regulation of gene expression	GO:0010468	FALSE	6.233053611642997e-7	6.205299137645048	5499	158	78	21010	MIF,SON,SYNCRIP,VIM,IQGAP1,PPP1CB,TCERG1,PUF60,EIF4A3,RPS26,UBR2,EIF5A,PRDX6,RPS7,DDX56,PFN1,HNRNPA2B1,HNRNPK,HNRNPA1,TCOF1,HNRNPU,SFPQ,RAN,NAT10,SMARCA4,EEF2,TOP1,C1QBP,NCL,DDX3X,RBM39,AP3D1,PRDX2,SERBP1,SNW1,IGF2BP1,DDX5,CDC5L,DNMT1,PSMC5,PRMT1,NAF1,MYBBP1A,SRPK1,PTBP1,SHMT2,ABCE1,RPL10,LYAR,ENO1,HSPA5,PARP1,TCEB3,MYH9,RPL23,GAPDH,PKM,ABCF1,NPM1,EIF5B,RRP1B,DDX17,GNL3,PHB,HSPD1,CHD4,ACTG1,ACACB…
GO:BP	negative regulation of nitrogen compound metabolic process	GO:0051172	FALSE	0.0000011359237286329584	5.944650828260447	2353	158	46	21010	MIF,SYNCRIP,VTN,TCERG1,EIF4A3,RPS26,RPS7,SERPINH1,HNRNPA2B1,HNRNPK,HNRNPA1,HNRNPU,SFPQ,NAT10,SMARCA4,C1QBP,NCL,DDX3X,SERBP1,SNW1,TTF1,IGF2BP1,DDX5,DNMT1,PSMC5,NAF1,MYBBP1A,PTBP1,SHMT2,ABCE1,GTPBP4,RPL10,LYAR,ENO1,PARP1,RPL23,GAPDH,NPM1,PHB,CHD4,HSPA1B,CREG1,DHX9,EZR,EXOSC10,RPS3
GO:BP	RNA processing	GO:0006396	FALSE	0.000001168463071302319	5.932385008717248	3368	158	57	21010	SON,NOP58,SYNCRIP,TCERG1,PUF60,EIF4A3,RPS26,PRDX6,NOP56,DDX18,RPS7,RPS8,DDX56,RPS6,HNRNPM,EIF4A1,HNRNPA2B1,HNRNPK,FTSJ3,HNRNPA1,RPL23A,HNRNPU,SFPQ,NAT10,C1QBP,NCL,DDX3X,RBM39,SNRPE,RPS24,SNW1,DDX5,CDC5L,PRMT1,NAF1,LUC7L3,SRPK1,DHX16,PTBP1,GTPBP4,NOL9,LYAR,SRRM2,HSD17B10,RPL23,PRPF4B,NPM1,RRP1B,DDX17,TSR1,SNRNP200,DHX9,EXOSC10,FBL,DHX15,RPS3,WDR6
GO:BP	telomere maintenance via telomere lengthening	GO:0010833	FALSE	0.0000013778120177000423	5.86081003151735	84	158	10	21010	HNRNPA2B1,HNRNPA1,HNRNPU,NAT10,NAF1,PARP1,CCT3,CCT2,RPA1,EXOSC10
GO:BP	nucleic acid metabolic process	GO:0090304	FALSE	0.000001390641886880439	5.856784693570372	7482	158	94	21010	SON,NOP58,SYNCRIP,VIM,GTF3C1,TCERG1,PUF60,EIF4A3,RPS26,UBR2,EIF5A,PRDX6,NOP56,DDX18,RPS7,RPS8,DDX56,PFN1,RPS6,HNRNPM,EIF4A1,HNRNPA2B1,HNRNPK,FTSJ3,HNRNPA1,RPL23A,TCOF1,HNRNPU,SFPQ,RAN,NAT10,SMARCA4,TOP1,C1QBP,NCL,DDX3X,RBM39,AP3D1,SNRPE,PRDX2,RPS24,SERBP1,SNW1,TTF1,IGF2BP1,NAP1L1,DDX5,CDC5L,DNMT1,PSMC5,PRMT1,NAF1,MYBBP1A,LUC7L3,SRPK1,DHX16,PTBP1,ABCE1,GTPBP4,RPL10,NOL9,TAOK1,LYAR,ENO1,HSPA5,PARP1…
GO:BP	positive regulation of cellular metabolic process	GO:0031325	FALSE	0.0000018219428727175673	5.739465244515866	3407	158	57	21010	MIF,SYNCRIP,VIM,IQGAP1,VTN,TCERG1,EIF4A3,EIF5A,PRDX6,RPS7,HNRNPA2B1,HNRNPK,HNRNPA1,HNRNPU,SFPQ,NAT10,SMARCA4,EEF2,C1QBP,NCL,DDX3X,AP3D1,SNW1,IGF2BP1,CDC5L,DNMT1,PSMC5,PRMT1,NAF1,HSPH1,MYBBP1A,PTBP1,LYAR,ENO1,HSPA5,PARP1,MYH9,RPL23,GAPDH,PKM,CCT3,ABCF1,NPM1,RRP1B,DDX17,GNL3,PHB,HSPD1,CHD4,ACTG1,CCT2,HSPA1B,DHX9,EZR,PLP1,RPS3,ATAD5
GO:BP	regulation of telomere maintenance via telomere lengthening	GO:1904356	FALSE	0.0000018952668380165951	5.722329636292285	63	158	9	21010	HNRNPA2B1,HNRNPA1,HNRNPU,NAT10,NAF1,PARP1,CCT3,CCT2,EXOSC10
GO:BP	cellular component organization or biogenesis	GO:0071840	FALSE	0.0000023328733264521984	5.632108842482025	8309	158	100	21010	MIF,SON,NOP58,VIM,IQGAP1,VTN,PUF60,EIF4A3,PRDX4,UBR2,MAT1A,EIF5A,NOP56,DDX18,RPS7,RPS8,DDX56,SERPINH1,PFN1,KRT6A,RPS6,HIST1H2BN,HNRNPA2B1,HNRNPK,TUBB,FTSJ3,PDIA3,HNRNPA1,RPL23A,HNRNPU,SFPQ,RAN,NAT10,SMARCA4,TOP1,C1QBP,DDX3X,AP3D1,SNRPE,RPS24,SERBP1,IGF2BP1,NAP1L1,RPS15A,DNMT1,PRMT1,NAF1,TOMM22,MYBBP1A,LUC7L3,SRPK1,RPSA,SHMT2,ABCE1,GTPBP4,RPL10,NOL9,TAOK1,LYAR,ENO1,HSPA5,PARP1,HSPA4,MYH9,HSD17B10,…
GO:BP	regulation of macromolecule metabolic process	GO:0060255	FALSE	0.000004470300613648321	5.349663270948858	6772	158	87	21010	MIF,SON,SYNCRIP,VIM,IQGAP1,PPP1CB,VTN,TCERG1,PUF60,EIF4A3,RPS26,UBR2,EIF5A,PRDX6,RPS7,DDX56,SERPINH1,PFN1,HNRNPA2B1,HNRNPK,HNRNPA1,TCOF1,HNRNPU,SFPQ,RAN,NAT10,SMARCA4,EEF2,TOP1,C1QBP,NCL,DDX3X,RBM39,AP3D1,PRDX2,SERBP1,SNW1,TTF1,IGF2BP1,DDX5,CDC5L,DNMT1,PSMC5,PRMT1,NAF1,HSPH1,MYBBP1A,SRPK1,PTBP1,SHMT2,ABCE1,GTPBP4,RPL10,TAOK1,LYAR,ENO1,HSPA5,PARP1,TCEB3,MYH9,RPS2,RPL23,GAPDH,PKM,CCT3,ABCF1,NPM1,EI…
GO:BP	alternative mRNA splicing, via spliceosome	GO:0000380	FALSE	0.00000643438054137092	5.191493257681744	72	158	9	21010	PUF60,HNRNPM,HNRNPA1,HNRNPU,SFPQ,DDX5,PTBP1,DDX17,DHX9
GO:BP	negative regulation of nucleobase-containing compound metabolic process	GO:0045934	FALSE	0.000006465477284073672	5.189399409810889	1555	158	35	21010	SYNCRIP,TCERG1,RPS26,HNRNPA2B1,HNRNPK,HNRNPA1,HNRNPU,SFPQ,NAT10,SMARCA4,C1QBP,SNW1,TTF1,IGF2BP1,DDX5,DNMT1,PSMC5,NAF1,MYBBP1A,PTBP1,ABCE1,GTPBP4,RPL10,LYAR,ENO1,PARP1,RPL23,NPM1,PHB,CHD4,CREG1,DHX9,EZR,EXOSC10,RPS3
GO:BP	regulation of primary metabolic process	GO:0080090	FALSE	0.000006651381297832981	5.177088155037859	5766	158	78	21010	MIF,SON,SYNCRIP,VIM,IQGAP1,PPP1CB,VTN,TCERG1,PUF60,EIF4A3,RPS26,EIF5A,PRDX6,RPS7,SERPINH1,PFN1,HNRNPA2B1,HNRNPK,HNRNPA1,TCOF1,HNRNPU,SFPQ,NAT10,SMARCA4,EEF2,C1QBP,NCL,DDX3X,RBM39,AP3D1,PRDX2,SERBP1,SNW1,TTF1,IGF2BP1,DDX5,CDC5L,DNMT1,PSMC5,PRMT1,NAF1,MYBBP1A,SRPK1,PTBP1,SHMT2,ABCE1,GTPBP4,RPL10,TAOK1,LYAR,ENO1,HSPA5,PARP1,TCEB3,MYH9,RPS2,RPL23,GAPDH,PKM,CCT3,ABCF1,NPM1,EIF5B,RRP1B,DDX17,GNL3,PHB,H…
GO:BP	positive regulation of nitrogen compound metabolic process	GO:0051173	FALSE	0.000009493068164141927	5.0225934007019974	3071	158	52	21010	MIF,SYNCRIP,VIM,IQGAP1,VTN,TCERG1,EIF4A3,EIF5A,PRDX6,HNRNPA2B1,HNRNPK,HNRNPA1,HNRNPU,SFPQ,NAT10,SMARCA4,EEF2,C1QBP,NCL,DDX3X,AP3D1,SNW1,IGF2BP1,CDC5L,PSMC5,PRMT1,NAF1,MYBBP1A,PTBP1,TAOK1,LYAR,ENO1,HSPA5,PARP1,MYH9,RPS2,PKM,CCT3,ABCF1,NPM1,RRP1B,DDX17,GNL3,PHB,HSPD1,CHD4,CCT2,HSPA1B,DHX9,EZR,RPS3,ATAD5
GO:BP	regulation of nitrogen compound metabolic process	GO:0051171	FALSE	0.000010033874035552695	4.998531355372027	5587	158	76	21010	MIF,SON,SYNCRIP,VIM,IQGAP1,VTN,TCERG1,PUF60,EIF4A3,RPS26,EIF5A,PRDX6,RPS7,SERPINH1,PFN1,HNRNPA2B1,HNRNPK,HNRNPA1,TCOF1,HNRNPU,SFPQ,NAT10,SMARCA4,EEF2,C1QBP,NCL,DDX3X,RBM39,AP3D1,PRDX2,SERBP1,SNW1,TTF1,IGF2BP1,DDX5,CDC5L,DNMT1,PSMC5,PRMT1,NAF1,MYBBP1A,SRPK1,PTBP1,SHMT2,ABCE1,GTPBP4,RPL10,TAOK1,LYAR,ENO1,HSPA5,PARP1,TCEB3,MYH9,RPS2,RPL23,GAPDH,PKM,CCT3,ABCF1,NPM1,EIF5B,RRP1B,DDX17,GNL3,PHB,HSPD1,CH…
GO:BP	regulation of telomere maintenance	GO:0032204	FALSE	0.000012580095319120957	4.900316068238014	105	158	10	21010	HNRNPA2B1,HNRNPA1,HNRNPU,NAT10,NAF1,PARP1,CCT3,GNL3,CCT2,EXOSC10
GO:BP	positive regulation of metabolic process	GO:0009893	FALSE	0.000013973389268338336	4.854698242274379	3797	158	59	21010	MIF,SYNCRIP,VIM,IQGAP1,VTN,TCERG1,EIF4A3,EIF5A,PRDX6,RPS7,HNRNPA2B1,HNRNPK,HNRNPA1,HNRNPU,SFPQ,NAT10,SMARCA4,EEF2,C1QBP,NCL,DDX3X,AP3D1,SNW1,IGF2BP1,CDC5L,DNMT1,PSMC5,PRMT1,NAF1,HSPH1,MYBBP1A,PTBP1,TAOK1,LYAR,ENO1,HSPA5,PARP1,MYH9,RPS2,RPL23,GAPDH,PKM,CCT3,ABCF1,NPM1,RRP1B,DDX17,GNL3,PHB,HSPD1,CHD4,ACTG1,CCT2,HSPA1B,DHX9,EZR,PLP1,RPS3,ATAD5
GO:BP	positive regulation of protein metabolic process	GO:0051247	FALSE	0.000015559329091500122	4.808009133447946	1374	158	32	21010	MIF,SYNCRIP,VIM,IQGAP1,VTN,EIF4A3,EIF5A,HNRNPU,NAT10,EEF2,C1QBP,DDX3X,IGF2BP1,PSMC5,PRMT1,MYBBP1A,PTBP1,TAOK1,ENO1,HSPA5,MYH9,RPS2,PKM,ABCF1,NPM1,GNL3,PHB,HSPD1,HSPA1B,DHX9,EZR,RPS3
GO:BP	regulation of protein metabolic process	GO:0051246	FALSE	0.000019178506539413433	4.717185215045691	2389	158	44	21010	MIF,SYNCRIP,VIM,IQGAP1,VTN,EIF4A3,EIF5A,RPS7,SERPINH1,TCOF1,HNRNPU,NAT10,EEF2,C1QBP,NCL,DDX3X,SERBP1,IGF2BP1,PSMC5,PRMT1,MYBBP1A,PTBP1,SHMT2,ABCE1,GTPBP4,RPL10,TAOK1,ENO1,HSPA5,MYH9,RPS2,RPL23,GAPDH,PKM,ABCF1,NPM1,EIF5B,GNL3,PHB,HSPD1,HSPA1B,DHX9,EZR,RPS3
GO:BP	negative regulation of cellular metabolic process	GO:0031324	FALSE	0.000019612178820400058	4.707474155587039	3233	158	53	21010	MIF,SYNCRIP,VIM,IQGAP1,TCERG1,EIF4A3,RPS26,UBR2,DDX56,HNRNPA2B1,HNRNPK,HNRNPA1,HNRNPU,SFPQ,RAN,NAT10,SMARCA4,C1QBP,NCL,DDX3X,SERBP1,SNW1,TTF1,IGF2BP1,DDX5,DNMT1,PSMC5,NAF1,MYBBP1A,PTBP1,SHMT2,ABCE1,GTPBP4,RPL10,LYAR,ENO1,PARP1,RPL23,GAPDH,NPM1,DDX17,PHB,CHD4,ACACB,HSPA1B,PC,CREG1,DHX9,EZR,EXOSC10,FBL,RPS3,WDR6
GO:BP	regulation of cellular metabolic process	GO:0031323	FALSE	0.000020700638616230798	4.684016256319558	6726	158	85	21010	MIF,SON,SYNCRIP,VIM,IQGAP1,PPP1CB,VTN,TCERG1,PUF60,EIF4A3,RPS26,UBR2,EIF5A,PRDX6,RPS7,DDX56,PFN1,HNRNPA2B1,HNRNPK,HNRNPA1,TCOF1,HNRNPU,SFPQ,RAN,NAT10,SMARCA4,EEF2,TOP1,C1QBP,NCL,DDX3X,RBM39,AP3D1,PRDX2,SERBP1,SNW1,TTF1,IGF2BP1,DDX5,CDC5L,DNMT1,PSMC5,PRMT1,NAF1,HSPH1,MYBBP1A,SRPK1,PTBP1,SHMT2,ABCE1,GTPBP4,RPL10,LYAR,ENO1,HSPA5,PARP1,TCEB3,MYH9,RPL23,GAPDH,PKM,CCT3,ABCF1,NPM1,EIF5B,RRP1B,DDX17,GNL3…
GO:BP	negative regulation of macromolecule metabolic process	GO:0010605	FALSE	0.000021412992773307272	4.669322629571527	3339	158	54	21010	MIF,SYNCRIP,VIM,VTN,TCERG1,EIF4A3,RPS26,UBR2,RPS7,DDX56,SERPINH1,HNRNPA2B1,HNRNPK,HNRNPA1,HNRNPU,SFPQ,RAN,NAT10,SMARCA4,C1QBP,NCL,DDX3X,SERBP1,SNW1,TTF1,IGF2BP1,DDX5,DNMT1,PSMC5,NAF1,MYBBP1A,PTBP1,SHMT2,ABCE1,GTPBP4,RPL10,LYAR,ENO1,PARP1,RPL23,GAPDH,NPM1,DDX17,PHB,CHD4,ACACB,HSPA1B,PC,CREG1,DHX9,EZR,EXOSC10,FBL,RPS3
GO:BP	ribonucleoprotein complex biogenesis	GO:0022613	FALSE	0.000027626928260531388	4.558667400051345	1894	158	38	21010	NOP58,PUF60,EIF4A3,NOP56,DDX18,RPS7,RPS8,DDX56,RPS6,FTSJ3,RPL23A,RAN,NAT10,C1QBP,DDX3X,SNRPE,RPS24,SERBP1,RPS15A,NAF1,MYBBP1A,LUC7L3,SRPK1,RPSA,ABCE1,GTPBP4,RPL10,NOL9,LYAR,NPM1,EIF5B,RRP1B,DDX17,TSR1,SNRNP200,DHX9,EXOSC10,FBL
GO:BP	cellular component biogenesis	GO:0044085	FALSE	0.000027765106466214923	4.556500656871732	4926	158	69	21010	MIF,NOP58,IQGAP1,VTN,PUF60,EIF4A3,MAT1A,NOP56,DDX18,RPS7,RPS8,DDX56,PFN1,RPS6,HIST1H2BN,TUBB,FTSJ3,PDIA3,RPL23A,HNRNPU,RAN,NAT10,SMARCA4,C1QBP,DDX3X,AP3D1,SNRPE,RPS24,SERBP1,NAP1L1,RPS15A,PRMT1,NAF1,MYBBP1A,LUC7L3,SRPK1,RPSA,SHMT2,ABCE1,GTPBP4,RPL10,NOL9,LYAR,HSPA5,HSPA4,HSD17B10,ALDOA,KRT10,NPM1,EIF5B,RRP1B,DDX17,HSPD1,CHD4,HSPA9,ACTG1,TSR1,CCT2,KRT1,ACACB,TUBA1A,HSPA1B,ACACA,SNRNP200,DHX9,EZR,E…
GO:BP	negative regulation of metabolic process	GO:0009892	FALSE	0.000027924370948052364	4.5540166014484065	3563	158	56	21010	MIF,SYNCRIP,VIM,IQGAP1,VTN,TCERG1,EIF4A3,RPS26,UBR2,RPS7,DDX56,SERPINH1,HNRNPA2B1,HNRNPK,HNRNPA1,HNRNPU,SFPQ,RAN,NAT10,SMARCA4,C1QBP,NCL,DDX3X,SERBP1,SNW1,TTF1,IGF2BP1,DDX5,DNMT1,PSMC5,NAF1,MYBBP1A,PTBP1,SHMT2,ABCE1,GTPBP4,RPL10,LYAR,ENO1,PARP1,RPL23,GAPDH,NPM1,DDX17,PHB,CHD4,ACACB,HSPA1B,PC,CREG1,DHX9,EZR,EXOSC10,FBL,RPS3,WDR6
GO:BP	negative regulation of macromolecule biosynthetic process	GO:0010558	FALSE	0.0000482977634962609	4.316072979470457	2741	158	47	21010	MIF,SYNCRIP,VIM,TCERG1,EIF4A3,RPS26,UBR2,DDX56,HNRNPA2B1,HNRNPK,HNRNPA1,HNRNPU,SFPQ,RAN,NAT10,SMARCA4,C1QBP,NCL,DDX3X,SERBP1,SNW1,IGF2BP1,DDX5,DNMT1,PSMC5,MYBBP1A,PTBP1,SHMT2,RPL10,LYAR,ENO1,PARP1,RPL23,GAPDH,NPM1,DDX17,PHB,CHD4,ACACB,HSPA1B,PC,CREG1,DHX9,EZR,EXOSC10,FBL,RPS3
GO:BP	regulation of nucleobase-containing compound metabolic process	GO:0019219	FALSE	0.00005346684755613631	4.271915421460441	4038	158	60	21010	SON,SYNCRIP,VIM,TCERG1,PUF60,EIF4A3,RPS26,EIF5A,PRDX6,PFN1,HNRNPA2B1,HNRNPK,HNRNPA1,HNRNPU,SFPQ,NAT10,SMARCA4,C1QBP,NCL,DDX3X,RBM39,AP3D1,PRDX2,SERBP1,SNW1,TTF1,IGF2BP1,DDX5,CDC5L,DNMT1,PSMC5,NAF1,MYBBP1A,SRPK1,PTBP1,ABCE1,GTPBP4,RPL10,LYAR,ENO1,HSPA5,PARP1,TCEB3,RPL23,PKM,CCT3,NPM1,RRP1B,DDX17,GNL3,PHB,CHD4,CCT2,HSPA1B,CREG1,DHX9,EZR,EXOSC10,RPS3,ATAD5
GO:BP	telomere maintenance	GO:0000723	FALSE	0.00006724659049748027	4.1723297301458855	160	158	11	21010	HNRNPA2B1,HNRNPA1,HNRNPU,NAT10,NAF1,PARP1,CCT3,GNL3,CCT2,RPA1,EXOSC10
GO:BP	negative regulation of cellular biosynthetic process	GO:0031327	FALSE	0.00008761862639555961	4.057403559574927	2794	158	47	21010	MIF,SYNCRIP,VIM,TCERG1,EIF4A3,RPS26,UBR2,DDX56,HNRNPA2B1,HNRNPK,HNRNPA1,HNRNPU,SFPQ,RAN,NAT10,SMARCA4,C1QBP,NCL,DDX3X,SERBP1,SNW1,IGF2BP1,DDX5,DNMT1,PSMC5,MYBBP1A,PTBP1,SHMT2,RPL10,LYAR,ENO1,PARP1,RPL23,GAPDH,NPM1,DDX17,PHB,CHD4,ACACB,HSPA1B,PC,CREG1,DHX9,EZR,EXOSC10,FBL,RPS3
GO:BP	regulation of metabolic process	GO:0019222	FALSE	0.00009441234590354336	4.024971211134129	7295	158	88	21010	MIF,SON,SYNCRIP,VIM,IQGAP1,PPP1CB,VTN,TCERG1,PUF60,EIF4A3,RPS26,UBR2,EIF5A,PRDX6,RPS7,DDX56,SERPINH1,PFN1,HNRNPA2B1,HNRNPK,HNRNPA1,TCOF1,HNRNPU,SFPQ,RAN,NAT10,SMARCA4,EEF2,TOP1,C1QBP,NCL,DDX3X,RBM39,AP3D1,PRDX2,SERBP1,SNW1,TTF1,IGF2BP1,DDX5,CDC5L,DNMT1,PSMC5,PRMT1,NAF1,HSPH1,MYBBP1A,SRPK1,PTBP1,SHMT2,ABCE1,GTPBP4,RPL10,TAOK1,LYAR,ENO1,HSPA5,PARP1,TCEB3,MYH9,RPS2,RPL23,GAPDH,PKM,CCT3,ABCF1,NPM1,EI…
GO:BP	negative regulation of RNA splicing	GO:0033119	FALSE	0.00010005366197860218	3.9997670114955817	28	158	6	21010	RPS26,HNRNPA2B1,HNRNPK,C1QBP,PTBP1,NPM1
GO:BP	negative regulation of biosynthetic process	GO:0009890	FALSE	0.00010223749984044486	3.990389779478857	2808	158	47	21010	MIF,SYNCRIP,VIM,TCERG1,EIF4A3,RPS26,UBR2,DDX56,HNRNPA2B1,HNRNPK,HNRNPA1,HNRNPU,SFPQ,RAN,NAT10,SMARCA4,C1QBP,NCL,DDX3X,SERBP1,SNW1,IGF2BP1,DDX5,DNMT1,PSMC5,MYBBP1A,PTBP1,SHMT2,RPL10,LYAR,ENO1,PARP1,RPL23,GAPDH,NPM1,DDX17,PHB,CHD4,ACACB,HSPA1B,PC,CREG1,DHX9,EZR,EXOSC10,FBL,RPS3
GO:BP	negative regulation of mRNA metabolic process	GO:1903312	FALSE	0.00011011363187325297	3.9581589128097328	99	158	9	21010	SYNCRIP,HNRNPA2B1,HNRNPK,HNRNPU,C1QBP,IGF2BP1,PTBP1,NPM1,DHX9
GO:BP	telomere maintenance via telomerase	GO:0007004	FALSE	0.00011289765363224943	3.9473150839842943	71	158	8	21010	HNRNPA1,HNRNPU,NAT10,NAF1,CCT3,CCT2,RPA1,EXOSC10
GO:BP	positive regulation of cytoplasmic translation	GO:2000767	FALSE	0.00011812610783963605	3.927654105455086	15	158	5	21010	SYNCRIP,HNRNPU,IGF2BP1,PKM,DHX9
GO:BP	RNA-templated DNA biosynthetic process	GO:0006278	FALSE	0.00012620556276860957	3.8989215022514085	72	158	8	21010	HNRNPA1,HNRNPU,NAT10,NAF1,CCT3,CCT2,RPA1,EXOSC10
GO:BP	protein folding	GO:0006457	TRUE	0.00015168174674893976	3.8190666786936553	214	158	12	21010	PRDX4,PDIA3,PDIA6,UNC45A,HSPH1,HSPA5,HSPA4,CCT3,HSPD1,HSPA9,CCT2,HSPA1B
GO:BP	biological process involved in interspecies interaction between organisms	GO:0044419	TRUE	0.00020039790989916388	3.698106812365637	1698	158	34	21010	MIF,SYNCRIP,VIM,EIF5A,DDX56,KRT6A,TUBB,SFPQ,SMARCA4,C1QBP,DDX3X,PRDX2,SNW1,RPS15A,SRPK1,RPSA,DHX16,SHMT2,LYAR,ENO1,PARP1,GAPDH,EEF1G,RRP1B,DDX17,PHB,HSPD1,ACTG1,KRT1,FASN,HSPA1B,PC,DHX9,DHX15
GO:BP	regulation of DNA metabolic process	GO:0051052	FALSE	0.00020109957131025862	3.696588855200312	531	158	18	21010	SYNCRIP,HNRNPA2B1,HNRNPA1,HNRNPU,NAT10,SMARCA4,TTF1,NAF1,GTPBP4,PARP1,CCT3,NPM1,GNL3,CCT2,DHX9,EXOSC10,RPS3,ATAD5
GO:BP	RNA metabolic process	GO:0016070	FALSE	0.0002355928833598108	3.6278378325786735	6934	158	84	21010	SON,NOP58,SYNCRIP,VIM,GTF3C1,TCERG1,PUF60,EIF4A3,RPS26,EIF5A,PRDX6,NOP56,DDX18,RPS7,RPS8,DDX56,PFN1,RPS6,HNRNPM,EIF4A1,HNRNPA2B1,HNRNPK,FTSJ3,HNRNPA1,RPL23A,TCOF1,HNRNPU,SFPQ,NAT10,SMARCA4,C1QBP,NCL,DDX3X,RBM39,AP3D1,SNRPE,PRDX2,RPS24,SERBP1,SNW1,TTF1,IGF2BP1,DDX5,CDC5L,DNMT1,PSMC5,PRMT1,NAF1,MYBBP1A,LUC7L3,SRPK1,DHX16,PTBP1,ABCE1,GTPBP4,RPL10,NOL9,LYAR,ENO1,HSPA5,PARP1,SRRM2,TCEB3,HSD17B10,RPL23…
GO:BP	heterocycle biosynthetic process	GO:0018130	FALSE	0.00024082049163820794	3.618306561323022	4099	158	59	21010	GTF3C1,CAD,TCERG1,EIF5A,DDX56,PFN1,HNRNPA2B1,HNRNPK,HNRNPA1,TCOF1,HNRNPU,SFPQ,NAT10,NME1-NME2,SMARCA4,C1QBP,NCL,DDX3X,AP3D1,PRDX2,SNW1,TTF1,DDX5,CDC5L,DNMT1,PSMC5,NAF1,PAICS,MYBBP1A,PTBP1,SHMT2,RPL10,LYAR,ENO1,HSPA5,PARP1,TCEB3,RPL23,CTPS1,ALDOA,PKM,CCT3,NPM1,RRP1B,DDX17,GNL3,PHB,CHD4,ACLY,CCT2,ACACB,HSPA1B,ACACA,CREG1,RPA1,DHX9,EZR,EXOSC10,RPS3
GO:BP	aromatic compound biosynthetic process	GO:0019438	FALSE	0.0002652845748644494	3.576288001604586	4110	158	59	21010	GTF3C1,CAD,TCERG1,EIF5A,DDX56,PFN1,HNRNPA2B1,HNRNPK,HNRNPA1,TCOF1,HNRNPU,SFPQ,NAT10,NME1-NME2,SMARCA4,C1QBP,NCL,DDX3X,AP3D1,PRDX2,SNW1,TTF1,DDX5,CDC5L,DNMT1,PSMC5,NAF1,PAICS,MYBBP1A,PTBP1,SHMT2,RPL10,LYAR,ENO1,HSPA5,PARP1,TCEB3,RPL23,CTPS1,ALDOA,PKM,CCT3,NPM1,RRP1B,DDX17,GNL3,PHB,CHD4,ACLY,CCT2,ACACB,HSPA1B,ACACA,CREG1,RPA1,DHX9,EZR,EXOSC10,RPS3
GO:BP	programmed cell death	GO:0012501	TRUE	0.00028701373410257086	3.5420973210282067	1982	158	37	21010	MIF,SON,ALB,PUF60,EIF5A,RPS7,RPS6,HNRNPK,PDIA3,SFPQ,TOP1,C1QBP,DDX3X,PRDX2,SNW1,DDX5,DNMT1,PSMC5,MYBBP1A,RPL10,TAOK1,ENO1,HSPA5,PARP1,GAPDH,PKM,NPM1,RRP1B,PHB,HSPD1,HSPA9,TUBA1A,HSPA1B,DHX9,CASP14,RPS3,ATAD5
GO:BP	post-transcriptional regulation of gene expression	GO:0010608	FALSE	0.00028963784837379193	3.5381446874131957	1087	158	26	21010	SYNCRIP,VIM,EIF4A3,EIF5A,TCOF1,HNRNPU,RAN,NAT10,EEF2,C1QBP,NCL,DDX3X,SERBP1,IGF2BP1,PRMT1,NAF1,SHMT2,ABCE1,RPL10,GAPDH,PKM,ABCF1,NPM1,EIF5B,DHX9,RPS3
GO:BP	regulation of telomere maintenance via telomerase	GO:0032210	FALSE	0.0002902109225511499	3.537286246224868	54	158	7	21010	HNRNPA1,HNRNPU,NAT10,NAF1,CCT3,CCT2,EXOSC10
GO:BP	cell death	GO:0008219	FALSE	0.0003097297556893621	3.509017070035745	1988	158	37	21010	MIF,SON,ALB,PUF60,EIF5A,RPS7,RPS6,HNRNPK,PDIA3,SFPQ,TOP1,C1QBP,DDX3X,PRDX2,SNW1,DDX5,DNMT1,PSMC5,MYBBP1A,RPL10,TAOK1,ENO1,HSPA5,PARP1,GAPDH,PKM,NPM1,RRP1B,PHB,HSPD1,HSPA9,TUBA1A,HSPA1B,DHX9,CASP14,RPS3,ATAD5
GO:BP	nucleobase-containing compound biosynthetic process	GO:0034654	FALSE	0.00031964611705495084	3.49533056684986	4026	158	58	21010	GTF3C1,CAD,TCERG1,EIF5A,DDX56,PFN1,HNRNPA2B1,HNRNPK,HNRNPA1,TCOF1,HNRNPU,SFPQ,NAT10,NME1-NME2,SMARCA4,C1QBP,NCL,DDX3X,AP3D1,PRDX2,SNW1,TTF1,DDX5,CDC5L,DNMT1,PSMC5,NAF1,PAICS,MYBBP1A,PTBP1,RPL10,LYAR,ENO1,HSPA5,PARP1,TCEB3,RPL23,CTPS1,ALDOA,PKM,CCT3,NPM1,RRP1B,DDX17,GNL3,PHB,CHD4,ACLY,CCT2,ACACB,HSPA1B,ACACA,CREG1,RPA1,DHX9,EZR,EXOSC10,RPS3
GO:BP	organic cyclic compound biosynthetic process	GO:1901362	FALSE	0.0003716788982891709	3.429832094854545	4255	158	60	21010	GTF3C1,CAD,TCERG1,EIF5A,DDX56,PFN1,HNRNPA2B1,HNRNPK,HNRNPA1,TCOF1,HNRNPU,SFPQ,NAT10,NME1-NME2,SMARCA4,C1QBP,NCL,DDX3X,AP3D1,PRDX2,SNW1,TTF1,DDX5,CDC5L,DNMT1,PSMC5,NAF1,PAICS,MYBBP1A,PTBP1,SHMT2,RPL10,LYAR,ENO1,HSPA5,PARP1,TCEB3,HSD17B10,RPL23,CTPS1,ALDOA,PKM,CCT3,NPM1,RRP1B,DDX17,GNL3,PHB,CHD4,ACLY,CCT2,ACACB,HSPA1B,ACACA,CREG1,RPA1,DHX9,EZR,EXOSC10,RPS3
GO:BP	negative regulation of translation	GO:0017148	FALSE	0.0004096104613361018	3.387628960131531	191	158	11	21010	SYNCRIP,EIF4A3,HNRNPU,NCL,DDX3X,SERBP1,IGF2BP1,SHMT2,GAPDH,DHX9,RPS3
GO:BP	telomere organization	GO:0032200	FALSE	0.0004096104613361018	3.387628960131531	191	158	11	21010	HNRNPA2B1,HNRNPA1,HNRNPU,NAT10,NAF1,PARP1,CCT3,GNL3,CCT2,RPA1,EXOSC10
GO:BP	intrinsic apoptotic signaling pathway by p53 class mediator	GO:0072332	FALSE	0.00046723051234969724	3.330468803497527	85	158	8	21010	MIF,EIF5A,RPS7,HNRNPK,SNW1,DDX5,MYBBP1A,ATAD5
GO:BP	organelle organization	GO:0006996	FALSE	0.0005185481053545802	3.2852109482027108	3562	158	53	21010	SON,VIM,IQGAP1,UBR2,PFN1,KRT6A,HNRNPA2B1,TUBB,HNRNPA1,RPL23A,HNRNPU,RAN,NAT10,SMARCA4,TOP1,C1QBP,DDX3X,AP3D1,SERBP1,NAF1,TOMM22,SRPK1,RPSA,ABCE1,RPL10,TAOK1,PARP1,HSPA4,MYH9,HSD17B10,GAPDH,ALDOA,KRT2,CCT3,KRT10,NPM1,EIF5B,GNL3,PHB,HSPD1,HSPA9,ACTG1,KRT9,CCT2,TUBB2B,TUBA1A,HSPA1B,CREG1,RPA1,DHX9,EZR,EXOSC10,RPS3
GO:BP	negative regulation of gene expression	GO:0010629	FALSE	0.0006693137112347097	3.1743702781601315	1617	158	32	21010	MIF,SYNCRIP,VIM,EIF4A3,RPS26,UBR2,DDX56,HNRNPA2B1,HNRNPK,HNRNPU,RAN,C1QBP,NCL,DDX3X,SERBP1,IGF2BP1,DDX5,DNMT1,PTBP1,SHMT2,GAPDH,NPM1,DDX17,CHD4,ACACB,HSPA1B,PC,DHX9,EZR,EXOSC10,FBL,RPS3
GO:BP	biological process involved in interaction with symbiont	GO:0051702	FALSE	0.0006698131743560577	3.174046314703183	122	158	9	21010	DDX56,SMARCA4,SNW1,GAPDH,RRP1B,PHB,HSPD1,FASN,PC
GO:BP	response to stress	GO:0006950	TRUE	0.0007181052242240342	3.143811913763824	3909	158	56	21010	MIF,ALB,SYNCRIP,VIM,VTN,CAD,PRDX4,PRDX6,DDX56,SERPINH1,KRT6A,HNRNPK,TUBB,PDIA3,HNRNPA1,SFPQ,SMARCA4,C1QBP,DDX3X,PRDX2,SNW1,IGF2BP1,DDX5,PDIA6,CDC5L,PRMT1,HSPH1,MYBBP1A,SRPK1,DHX16,SHMT2,TAOK1,LYAR,ENO1,HSPA5,PARP1,HSPA4,MYH9,GAPDH,ABCF1,NPM1,DDX17,PHB,HSPD1,CHD4,ACTG1,KRT1,FASN,HSPA1B,RPA1,DHX9,EZR,PLP1,DHX15,RPS3,ATAD5
GO:BP	negative regulation of biological process	GO:0048519	FALSE	0.0007810269517287435	3.1073339792019437	5913	158	74	21010	MIF,SON,ALB,SYNCRIP,VIM,IQGAP1,VTN,TCERG1,EIF4A3,PRDX4,RPS26,UBR2,RPS7,DDX56,SERPINH1,PFN1,KRT6A,RPS6,HNRNPA2B1,HNRNPK,HNRNPA1,HNRNPU,SFPQ,RAN,NAT10,SMARCA4,C1QBP,NCL,DDX3X,PRDX2,SERBP1,SNW1,TTF1,IGF2BP1,DDX5,CDC5L,DNMT1,PSMC5,PRMT1,NAF1,MYBBP1A,SRPK1,PTBP1,SHMT2,ABCE1,GTPBP4,RPL10,TAOK1,LYAR,ENO1,HSPA5,PARP1,MYH9,RPL23,GAPDH,NPM1,RRP1B,DDX17,PHB,HSPD1,CHD4,HSPA9,KRT1,ACACB,HSPA1B,PC,CREG1,DHX9,E…
GO:BP	protein tetramerization	GO:0051262	TRUE	0.0007942831152951055	3.1000246694940494	91	158	8	21010	MAT1A,SHMT2,HSD17B10,ALDOA,KRT10,KRT1,ACACB,ACACA
GO:BP	'de novo' protein folding	GO:0006458	FALSE	0.0009462222448392585	3.024006846292335	40	158	6	21010	HSPH1,HSPA5,HSPD1,HSPA9,CCT2,HSPA1B
GO:BP	ribosome assembly	GO:0042255	FALSE	0.0010645629143513865	2.972828667200543	65	158	7	21010	RPL23A,C1QBP,DDX3X,RPSA,RPL10,NPM1,EIF5B
GO:BP	negative regulation of mRNA splicing, via spliceosome	GO:0048025	FALSE	0.0012608050507017404	2.8993520600960316	23	158	5	21010	HNRNPA2B1,HNRNPK,C1QBP,PTBP1,NPM1
GO:BP	negative regulation of amide metabolic process	GO:0034249	FALSE	0.0012742358977829301	2.8947501641343467	214	158	11	21010	SYNCRIP,EIF4A3,HNRNPU,NCL,DDX3X,SERBP1,IGF2BP1,SHMT2,GAPDH,DHX9,RPS3
GO:BP	chaperone-mediated protein folding	GO:0061077	FALSE	0.001313183440371523	2.881674602489008	67	158	7	21010	UNC45A,HSPH1,HSPA5,CCT3,HSPA9,CCT2,HSPA1B
GO:BP	intrinsic apoptotic signaling pathway	GO:0097193	FALSE	0.0014269550362051742	2.8455897114232886	314	158	13	21010	MIF,EIF5A,RPS7,HNRNPK,SFPQ,DDX3X,SNW1,DDX5,MYBBP1A,ENO1,PARP1,RPS3,ATAD5
GO:BP	protein stabilization	GO:0050821	TRUE	0.0016005022070050901	2.7957437226510757	219	158	11	21010	RPS7,PFN1,GTPBP4,RPL23,GAPDH,CCT3,NPM1,PHB,HSPD1,CCT2,HSPA1B
GO:BP	viral process	GO:0016032	TRUE	0.001621163710948983	2.7901731263163554	428	158	15	21010	DDX56,RAN,SMARCA4,DDX3X,SNW1,DDX5,PRMT1,SRPK1,RPSA,PTBP1,RRP1B,PHB,HSPA1B,PC,DHX9
GO:BP	positive regulation of biological process	GO:0048518	FALSE	0.0016307041406475864	2.7876248260470775	6253	158	76	21010	MIF,SYNCRIP,VIM,IQGAP1,VTN,TCERG1,EIF4A3,EIF5A,PRDX6,RPS7,DDX56,PFN1,KRT6A,RPS6,HNRNPA2B1,HNRNPK,PDIA3,HNRNPA1,HNRNPU,SFPQ,RAN,NAT10,SMARCA4,EEF2,C1QBP,NCL,DDX3X,AP3D1,PRDX2,SNW1,IGF2BP1,NAP1L1,DDX5,RPS15A,CDC5L,DNMT1,PSMC5,PRMT1,NAF1,HSPH1,MYBBP1A,SRPK1,PTBP1,TAOK1,LYAR,ENO1,HSPA5,PARP1,MYH9,RPS2,RPL23,GAPDH,KRT2,PKM,CCT3,ABCF1,KRT10,NPM1,RRP1B,DDX17,GNL3,PHB,HSPD1,CHD4,ACTG1,CCT2,KRT1,TUBB2B,AC…
GO:BP	cellular response to chemical stimulus	GO:0070887	TRUE	0.0016702088436112371	2.777229221093647	2691	158	43	21010	MIF,ALB,SYNCRIP,VIM,IQGAP1,CAD,EIF4A3,PRDX4,MRPL15,UBR2,EIF5A,PRDX6,PDIA3,HNRNPA1,HNRNPU,RAN,SMARCA4,C1QBP,NCL,DDX3X,PRDX2,SNW1,DDX5,DNMT1,ENO1,HSPA5,PARP1,RPL23,GAPDH,PKM,RPL3,NPM1,DDX17,PHB,HSPD1,ACTG1,FASN,TUBA1A,HSPA1B,ACACA,DHX9,EZR,RPS3
GO:BP	positive regulation of nucleobase-containing compound metabolic process	GO:0045935	FALSE	0.0016950345886117637	2.7708214352249345	2039	158	36	21010	SYNCRIP,TCERG1,EIF5A,PRDX6,HNRNPA2B1,HNRNPK,HNRNPA1,HNRNPU,SFPQ,SMARCA4,NCL,DDX3X,AP3D1,SNW1,IGF2BP1,CDC5L,PSMC5,NAF1,MYBBP1A,PTBP1,LYAR,ENO1,HSPA5,PARP1,PKM,CCT3,NPM1,RRP1B,DDX17,GNL3,PHB,CHD4,CCT2,DHX9,RPS3,ATAD5
GO:BP	negative regulation of RNA metabolic process	GO:0051253	FALSE	0.0017934919781821947	2.7463005614686384	1438	158	29	21010	SYNCRIP,TCERG1,RPS26,HNRNPA2B1,HNRNPK,HNRNPU,SFPQ,SMARCA4,C1QBP,SNW1,IGF2BP1,DDX5,DNMT1,PSMC5,NAF1,MYBBP1A,PTBP1,ABCE1,RPL10,LYAR,ENO1,PARP1,RPL23,NPM1,PHB,CHD4,CREG1,DHX9,EZR
GO:BP	CRD-mediated mRNA stabilization	GO:0070934	TRUE	0.0018058502809649068	2.7433182589206986	11	158	4	21010	SYNCRIP,HNRNPU,IGF2BP1,DHX9
GO:BP	ribosomal large subunit biogenesis	GO:0042273	FALSE	0.001958290431157009	2.708122898183991	71	158	7	21010	DDX18,FTSJ3,RPL23A,GTPBP4,RPL10,NOL9,NPM1
GO:BP	negative regulation of mRNA processing	GO:0050686	FALSE	0.001966710984395282	2.706259456605587	25	158	5	21010	HNRNPA2B1,HNRNPK,C1QBP,PTBP1,NPM1
GO:BP	signal transduction by p53 class mediator	GO:0072331	FALSE	0.0020559994962402054	2.686976996087329	180	158	10	21010	MIF,EIF5A,RPS7,HNRNPK,SNW1,DDX5,MYBBP1A,RPL23,NPM1,ATAD5
GO:BP	regulation of intrinsic apoptotic signaling pathway	GO:2001242	FALSE	0.002162326724857003	2.6650786840728595	181	158	10	21010	MIF,EIF5A,RPS7,HNRNPK,SFPQ,DDX3X,ENO1,PARP1,RPS3,ATAD5
GO:BP	negative regulation of nuclear-transcribed mRNA catabolic process, deadenylation-dependent decay	GO:1900152	FALSE	0.002692911528859244	2.5697779143788293	12	158	4	21010	SYNCRIP,HNRNPU,IGF2BP1,DHX9
GO:BP	organic substance catabolic process	GO:1901575	FALSE	0.002754521466657271	2.559953838714704	2173	158	37	21010	SYNCRIP,VIM,PPP1CB,PSMB2,EIF4A3,PRDX4,UBR2,MAT1A,PRDX6,RPS7,HNRNPU,PRDX2,SERBP1,IGF2BP1,DDX5,PSMA5,PSMC5,DENND3,NAF1,SHMT2,ENO1,HSPA5,HSD17B10,RPL23,GAPDH,ALDOA,PKM,NPM1,PHB,PCCB,MCCC1,ACACB,PCCA,HSPA1B,DHX9,EZR,EXOSC10
GO:BP	regulation of RNA metabolic process	GO:0051252	FALSE	0.0027557846246468944	2.559754727251499	3753	158	53	21010	SON,SYNCRIP,VIM,TCERG1,PUF60,EIF4A3,RPS26,EIF5A,PRDX6,PFN1,HNRNPA2B1,HNRNPK,HNRNPA1,HNRNPU,SFPQ,SMARCA4,C1QBP,NCL,DDX3X,RBM39,AP3D1,PRDX2,SERBP1,SNW1,IGF2BP1,DDX5,CDC5L,DNMT1,PSMC5,NAF1,MYBBP1A,SRPK1,PTBP1,ABCE1,RPL10,LYAR,ENO1,HSPA5,PARP1,TCEB3,RPL23,PKM,NPM1,RRP1B,DDX17,GNL3,PHB,CHD4,HSPA1B,CREG1,DHX9,EZR,RPS3
GO:BP	regulation of signal transduction by p53 class mediator	GO:1901796	FALSE	0.0031674203498430835	2.4992942973785577	109	158	8	21010	MIF,EIF5A,RPS7,HNRNPK,DDX5,RPL23,NPM1,ATAD5
GO:BP	response to biotic stimulus	GO:0009607	FALSE	0.0032194941123601275	2.4922123647858174	1565	158	30	21010	MIF,SYNCRIP,VIM,EIF5A,DDX56,KRT6A,TUBB,SFPQ,C1QBP,DDX3X,PRDX2,RPS15A,SRPK1,DHX16,SHMT2,LYAR,ENO1,HSPA5,PARP1,GAPDH,EEF1G,RRP1B,DDX17,PHB,HSPD1,ACTG1,KRT1,HSPA1B,DHX9,DHX15
GO:BP	response to organic substance	GO:0010033	FALSE	0.0038043155114987387	2.4197234719605354	2775	158	43	21010	MIF,SYNCRIP,VIM,IQGAP1,CAD,PSMB2,EIF4A3,MRPL15,UBR2,EIF5A,SERPINH1,PDIA3,HNRNPU,RAN,SMARCA4,NCL,PRDX2,SNW1,DDX5,DNMT1,HSPH1,SHMT2,HSPA5,PARP1,HSPA4,RPL23,GAPDH,PKM,RPL3,NPM1,DDX17,PHB,HSPD1,ACTG1,FASN,ACACB,TUBA1A,HSPA1B,ACACA,DHX9,EZR,DHX15,RPS3
GO:BP	negative regulation of telomere maintenance via telomere lengthening	GO:1904357	FALSE	0.004290490486948017	2.3674930566267975	29	158	5	21010	HNRNPA1,HNRNPU,NAT10,PARP1,EXOSC10
GO:BP	DNA biosynthetic process	GO:0071897	FALSE	0.004864734327720299	2.312940872385469	198	158	10	21010	HNRNPA2B1,HNRNPA1,HNRNPU,NAT10,NAF1,CCT3,PHB,CCT2,RPA1,EXOSC10
GO:BP	positive regulation of cellular process	GO:0048522	FALSE	0.00489278279205453	2.3104440636813006	5711	158	70	21010	MIF,SYNCRIP,VIM,IQGAP1,VTN,TCERG1,EIF4A3,EIF5A,PRDX6,RPS7,DDX56,PFN1,KRT6A,RPS6,HNRNPA2B1,HNRNPK,PDIA3,HNRNPA1,HNRNPU,SFPQ,RAN,NAT10,SMARCA4,EEF2,C1QBP,NCL,DDX3X,AP3D1,PRDX2,SNW1,IGF2BP1,NAP1L1,DDX5,RPS15A,CDC5L,DNMT1,PSMC5,PRMT1,NAF1,HSPH1,MYBBP1A,PTBP1,TAOK1,LYAR,ENO1,HSPA5,PARP1,MYH9,RPL23,GAPDH,PKM,CCT3,ABCF1,NPM1,RRP1B,DDX17,GNL3,PHB,HSPD1,CHD4,ACTG1,CCT2,TUBB2B,HSPA1B,DHX9,EZR,PLP1,DHX15,RP…
GO:BP	RNA splicing	GO:0008380	FALSE	0.0053183286763087674	2.2742248264823846	1868	158	33	21010	SON,SYNCRIP,TCERG1,PUF60,EIF4A3,RPS26,PRDX6,HNRNPM,HNRNPA2B1,HNRNPK,HNRNPA1,HNRNPU,SFPQ,C1QBP,NCL,RBM39,SNRPE,SNW1,DDX5,CDC5L,PRMT1,LUC7L3,SRPK1,DHX16,PTBP1,SRRM2,PRPF4B,NPM1,RRP1B,DDX17,SNRNP200,DHX9,DHX15
GO:BP	mRNA catabolic process	GO:0006402	FALSE	0.005589390706221095	2.2526355315318423	249	158	11	21010	SYNCRIP,VIM,EIF4A3,HNRNPU,SERBP1,IGF2BP1,DDX5,NPM1,HSPA1B,DHX9,EXOSC10
GO:BP	RNA catabolic process	GO:0006401	FALSE	0.0056934677649894735	2.2446231338753657	301	158	12	21010	SYNCRIP,VIM,EIF4A3,HNRNPU,SERBP1,IGF2BP1,DDX5,NAF1,NPM1,HSPA1B,DHX9,EXOSC10
GO:BP	response to other organism	GO:0051707	FALSE	0.005942870553100019	2.2260037293895483	1527	158	29	21010	MIF,SYNCRIP,VIM,EIF5A,DDX56,KRT6A,TUBB,SFPQ,C1QBP,DDX3X,PRDX2,RPS15A,SRPK1,DHX16,SHMT2,LYAR,ENO1,PARP1,GAPDH,EEF1G,RRP1B,DDX17,PHB,HSPD1,ACTG1,KRT1,HSPA1B,DHX9,DHX15
GO:BP	regulation of chromosome organization	GO:0033044	FALSE	0.006036524720579276	2.2192130165194532	251	158	11	21010	HNRNPA2B1,HNRNPA1,HNRNPU,NAT10,SMARCA4,NAF1,PARP1,CCT3,GNL3,CCT2,EXOSC10
GO:BP	response to external biotic stimulus	GO:0043207	FALSE	0.006176356319036219	2.2092676571465124	1530	158	29	21010	MIF,SYNCRIP,VIM,EIF5A,DDX56,KRT6A,TUBB,SFPQ,C1QBP,DDX3X,PRDX2,RPS15A,SRPK1,DHX16,SHMT2,LYAR,ENO1,PARP1,GAPDH,EEF1G,RRP1B,DDX17,PHB,HSPD1,ACTG1,KRT1,HSPA1B,DHX9,DHX15
GO:BP	positive regulation of DNA metabolic process	GO:0051054	FALSE	0.006304308196158861	2.2003625638212614	304	158	12	21010	SYNCRIP,HNRNPA2B1,HNRNPA1,SMARCA4,NAF1,PARP1,CCT3,GNL3,CCT2,DHX9,RPS3,ATAD5
GO:BP	mRNA metabolic process	GO:0016071	FALSE	0.006573123734669644	2.182228192338762	2161	158	36	21010	SON,SYNCRIP,VIM,TCERG1,PUF60,EIF4A3,PRDX6,HNRNPM,HNRNPA2B1,HNRNPK,HNRNPA1,HNRNPU,SFPQ,C1QBP,NCL,RBM39,SNRPE,SERBP1,SNW1,IGF2BP1,DDX5,CDC5L,LUC7L3,SRPK1,DHX16,PTBP1,SRRM2,PRPF4B,NPM1,RRP1B,DDX17,HSPA1B,SNRNP200,DHX9,EXOSC10,DHX15
GO:BP	protein maturation	GO:0051604	FALSE	0.0065872368356790535	2.1812967217749013	543	158	16	21010	PRDX4,SERPINH1,PDIA3,PDIA6,UNC45A,HSPH1,ENO1,HSPA5,PARP1,HSPA4,MYH9,CCT3,HSPD1,HSPA9,CCT2,HSPA1B
GO:BP	regulation of cytoplasmic translation	GO:2000765	FALSE	0.007144261875652926	2.1460426345973156	32	158	5	21010	SYNCRIP,HNRNPU,IGF2BP1,PKM,DHX9
GO:BP	regulation of alternative mRNA splicing, via spliceosome	GO:0000381	FALSE	0.007248295539310326	2.139764107208319	56	158	6	21010	PUF60,HNRNPA1,HNRNPU,DDX5,PTBP1,DDX17
GO:BP	regulation of DNA biosynthetic process	GO:2000278	FALSE	0.00785713083254823	2.104736015166079	123	158	8	21010	HNRNPA2B1,HNRNPA1,HNRNPU,NAT10,NAF1,CCT3,CCT2,EXOSC10
GO:BP	modulation by host of symbiont process	GO:0051851	FALSE	0.008401202009074961	2.0756585724426393	88	158	7	21010	DDX56,SMARCA4,SNW1,RRP1B,PHB,FASN,PC
GO:BP	maturation of LSU-rRNA from tricistronic rRNA transcript (SSU-rRNA, 5.8S rRNA, LSU-rRNA)	GO:0000463	FALSE	0.00967141397557654	2.014510026754806	16	158	4	21010	DDX18,FTSJ3,GTPBP4,NOL9
GO:BP	regulation of intrinsic apoptotic signaling pathway by p53 class mediator	GO:1902253	FALSE	0.009752720896458952	2.010874204253623	34	158	5	21010	MIF,EIF5A,RPS7,HNRNPK,ATAD5
GO:BP	protein homotetramerization	GO:0051289	FALSE	0.009873544080216604	2.005526930592034	59	158	6	21010	MAT1A,SHMT2,HSD17B10,ALDOA,ACACB,ACACA
GO:BP	response to external stimulus	GO:0009605	FALSE	0.010416961805824068	1.982258928192371	2686	158	41	21010	MIF,ALB,SYNCRIP,VIM,PPP1CB,VTN,CAD,EIF5A,DDX56,KRT6A,TUBB,HNRNPA1,SFPQ,C1QBP,DDX3X,AP3D1,PRDX2,SNW1,RPS15A,MYBBP1A,SRPK1,DHX16,SHMT2,LYAR,ENO1,HSPA5,PARP1,GAPDH,EEF1G,RRP1B,DDX17,PHB,HSPD1,ACTG1,KRT1,TUBB2B,ACACB,TUBA1A,HSPA1B,DHX9,DHX15
GO:BP	biological process involved in symbiotic interaction	GO:0044403	FALSE	0.010985036643168628	1.9591984900498531	321	158	12	21010	DDX56,KRT6A,SMARCA4,SNW1,RPSA,GAPDH,RRP1B,PHB,HSPD1,FASN,HSPA1B,PC
GO:BP	chromosome organization	GO:0051276	FALSE	0.011051198161494281	1.9565906335882681	633	158	17	21010	HNRNPA2B1,HNRNPA1,HNRNPU,RAN,NAT10,SMARCA4,TOP1,DDX3X,NAF1,PARP1,CCT3,GNL3,CCT2,HSPA1B,RPA1,DHX9,EXOSC10
GO:BP	'de novo' post-translational protein folding	GO:0051084	FALSE	0.013054086563468499	1.8842535117632184	36	158	5	21010	HSPH1,HSPA5,HSPA9,CCT2,HSPA1B
GO:BP	negative regulation of cellular process	GO:0048523	FALSE	0.013076296372203429	1.8835152447639	5511	158	67	21010	MIF,SON,ALB,SYNCRIP,VIM,IQGAP1,TCERG1,EIF4A3,PRDX4,RPS26,UBR2,DDX56,PFN1,RPS6,HNRNPA2B1,HNRNPK,HNRNPA1,HNRNPU,SFPQ,RAN,NAT10,SMARCA4,C1QBP,NCL,DDX3X,PRDX2,SERBP1,SNW1,TTF1,IGF2BP1,DDX5,CDC5L,DNMT1,PSMC5,PRMT1,NAF1,MYBBP1A,PTBP1,SHMT2,ABCE1,GTPBP4,RPL10,TAOK1,LYAR,ENO1,HSPA5,PARP1,MYH9,RPL23,GAPDH,NPM1,DDX17,PHB,HSPD1,CHD4,HSPA9,ACACB,HSPA1B,PC,CREG1,DHX9,EZR,EXOSC10,FBL,RPS3,WDR6,ATAD5
GO:BP	regulation of apoptotic signaling pathway	GO:2001233	FALSE	0.013773231522466432	1.8609641521378912	386	158	13	21010	MIF,EIF5A,RPS7,HNRNPK,PDIA3,SFPQ,DDX3X,PRDX2,ENO1,PARP1,HSPA1B,RPS3,ATAD5
GO:BP	positive regulation of telomere maintenance via telomere lengthening	GO:1904358	FALSE	0.015002559008257456	1.8238346563858818	37	158	5	21010	HNRNPA2B1,HNRNPA1,NAF1,CCT3,CCT2
GO:BP	negative regulation of telomere maintenance	GO:0032205	FALSE	0.015002559008257456	1.8238346563858818	37	158	5	21010	HNRNPA1,HNRNPU,NAT10,PARP1,EXOSC10
GO:BP	response to chemical	GO:0042221	FALSE	0.01592554056593742	1.7979058173399067	3975	158	53	21010	MIF,ALB,SYNCRIP,VIM,IQGAP1,CAD,PSMB2,EIF4A3,PRDX4,MRPL15,UBR2,EIF5A,PRDX6,SERPINH1,PDIA3,HNRNPA1,HNRNPU,RAN,SMARCA4,TOP1,C1QBP,NCL,DDX3X,PRDX2,SNW1,DDX5,DNMT1,HSPH1,SHMT2,ENO1,HSPA5,PARP1,HSPA4,RPL23,CTPS1,GAPDH,PKM,RPL3,NPM1,DDX17,PHB,HSPD1,ACTG1,TUBB2B,FASN,ACACB,TUBA1A,HSPA1B,ACACA,DHX9,EZR,DHX15,RPS3
GO:BP	regulation of telomerase RNA localization to Cajal body	GO:1904872	FALSE	0.016071043918337975	1.7939559120824036	18	158	4	21010	NAF1,CCT3,CCT2,EXOSC10
GO:BP	nucleobase biosynthetic process	GO:0046112	TRUE	0.016071043918337975	1.7939559120824036	18	158	4	21010	CAD,PAICS,SHMT2,CTPS1
GO:BP	osteoblast differentiation	GO:0001649	TRUE	0.01696995414616881	1.770319331170407	228	158	10	21010	SYNCRIP,HNRNPU,DDX5,MYBBP1A,GTPBP4,PHB,FASN,SNRNP200,DHX9,FBL
GO:BP	ribonucleotide biosynthetic process	GO:0009260	TRUE	0.019021896010633428	1.720746196866704	231	158	10	21010	CAD,NME1-NME2,PAICS,ENO1,PARP1,CTPS1,ALDOA,ACLY,ACACB,ACACA
GO:BP	non-membrane-bounded organelle assembly	GO:0140694	FALSE	0.019098346882838475	1.7190042228429556	398	158	13	21010	TUBB,RPL23A,HNRNPU,C1QBP,DDX3X,RPSA,RPL10,NPM1,EIF5B,ACTG1,HSPA1B,EZR,RPS3
GO:BP	telomerase RNA localization to Cajal body	GO:0090671	FALSE	0.020237612587025344	1.6938407221403449	19	158	4	21010	NAF1,CCT3,CCT2,EXOSC10
GO:BP	RNA localization to Cajal body	GO:0090670	FALSE	0.020237612587025344	1.6938407221403449	19	158	4	21010	NAF1,CCT3,CCT2,EXOSC10
GO:BP	RNA localization to nucleus	GO:0090685	FALSE	0.020237612587025344	1.6938407221403449	19	158	4	21010	NAF1,CCT3,CCT2,EXOSC10
GO:BP	telomerase RNA localization	GO:0090672	FALSE	0.020237612587025344	1.6938407221403449	19	158	4	21010	NAF1,CCT3,CCT2,EXOSC10
GO:BP	cell cycle	GO:0007049	TRUE	0.021344517713095736	1.6707136537861318	1811	158	31	21010	SON,IQGAP1,PPP1CB,UBR2,RPS6,TUBB,HNRNPU,RAN,NAT10,SMARCA4,TOP1,DDX3X,RPS15A,CDC5L,PPM1G,MYBBP1A,SRPK1,GTPBP4,TAOK1,MYH9,RPL23,PRPF4B,NPM1,TUBB2B,TUBA1A,HSPA1B,RPA1,EZR,RPS3,WDR6,ATAD5
GO:BP	apoptotic process	GO:0006915	FALSE	0.02317507612371343	1.6349788306439017	1910	158	32	21010	MIF,SON,ALB,PUF60,EIF5A,RPS7,RPS6,HNRNPK,PDIA3,SFPQ,C1QBP,DDX3X,PRDX2,SNW1,DDX5,DNMT1,MYBBP1A,RPL10,TAOK1,ENO1,HSPA5,PARP1,GAPDH,NPM1,RRP1B,PHB,HSPD1,HSPA9,TUBA1A,HSPA1B,RPS3,ATAD5
GO:BP	ribose phosphate biosynthetic process	GO:0046390	FALSE	0.025572809343318965	1.5922215592133335	239	158	10	21010	CAD,NME1-NME2,PAICS,ENO1,PARP1,CTPS1,ALDOA,ACLY,ACACB,ACACA
GO:BP	positive regulation of telomere maintenance	GO:0032206	FALSE	0.0268409975673962	1.571201347297212	70	158	6	21010	HNRNPA2B1,HNRNPA1,NAF1,CCT3,GNL3,CCT2
GO:BP	negative regulation of DNA metabolic process	GO:0051053	FALSE	0.02778187556879755	1.5562384381634404	146	158	8	21010	HNRNPA1,HNRNPU,NAT10,TTF1,GTPBP4,PARP1,EXOSC10,RPS3
GO:BP	transcription by RNA polymerase I	GO:0006360	TRUE	0.029137862841510563	1.5355423053517718	71	158	6	21010	TCOF1,SMARCA4,NCL,TTF1,MYBBP1A,LYAR
GO:BP	apoptotic signaling pathway	GO:0097190	FALSE	0.029951343077279077	1.5235836982171433	613	158	16	21010	MIF,EIF5A,RPS7,HNRNPK,PDIA3,SFPQ,DDX3X,PRDX2,SNW1,DDX5,MYBBP1A,ENO1,PARP1,HSPA1B,RPS3,ATAD5
GO:BP	negative regulation of telomere maintenance via telomerase	GO:0032211	FALSE	0.030884955850510376	1.5102530151420046	21	158	4	21010	HNRNPA1,HNRNPU,NAT10,EXOSC10
GO:BP	catabolic process	GO:0009056	FALSE	0.03292379508777003	1.48249010995184	2616	158	39	21010	SYNCRIP,VIM,PPP1CB,PSMB2,EIF4A3,PRDX4,UBR2,MAT1A,PRDX6,RPS7,HNRNPU,PRDX2,SERBP1,IGF2BP1,DDX5,PSMA5,PSMC5,DENND3,NAF1,SHMT2,ENO1,HSPA5,HSD17B10,RPL23,GAPDH,ALDOA,PKM,NPM1,PHB,PCCB,MCCC1,ACACB,PCCA,HSPA1B,CREG1,DHX9,EZR,EXOSC10,WDR6
GO:BP	protein refolding	GO:0042026	FALSE	0.037527672941359363	1.425648364978342	22	158	4	21010	HSPA5,HSPD1,HSPA9,HSPA1B
GO:BP	regulation of programmed cell death	GO:0043067	FALSE	0.03906338889391562	1.408230082756194	1507	158	27	21010	MIF,SON,ALB,EIF5A,RPS7,RPS6,HNRNPK,PDIA3,SFPQ,C1QBP,DDX3X,PRDX2,DNMT1,PSMC5,MYBBP1A,RPL10,ENO1,HSPA5,PARP1,NPM1,RRP1B,PHB,HSPD1,HSPA9,HSPA1B,RPS3,ATAD5
GO:BP	response to virus	GO:0009615	FALSE	0.04207007755174622	1.376026687406241	429	158	13	21010	EIF5A,DDX56,C1QBP,DDX3X,RPS15A,DHX16,ENO1,EEF1G,RRP1B,DDX17,PHB,DHX9,DHX15
GO:BP	translational elongation	GO:0006414	FALSE	0.043124013755676496	1.3652808241010532	76	158	6	21010	EIF4A3,EIF5A,EEF2,ABCE1,TCEB3,EEF1G
GO:BP	regulation of protein modification by small protein conjugation or removal	GO:1903320	TRUE	0.04319127644034065	1.3646039609720682	254	158	10	21010	RPS7,DDX3X,GTPBP4,HSPA5,RPS2,RPL23,NPM1,GNL3,HSPA1B,RPS3
GO:BP	maturation of LSU-rRNA	GO:0000470	FALSE	0.04516280302360315	1.345219111479006	23	158	4	21010	DDX18,FTSJ3,GTPBP4,NOL9
GO:CC	extracellular exosome	GO:0070062	TRUE	2.265109021025705e-30	29.644910890299965	2109	163	74	22090	MIF,ALB,VIM,IQGAP1,PPP1CB,VTN,CAD,PSMB2,PRDX4,RPS26,PRDX6,RPS8,PFN1,KRT6A,HNRNPM,HIST1H2BN,EIF4A1,HNRNPA2B1,HNRNPK,CKB,TUBB,PDIA3,HNRNPA1,RPL23A,CKAP4,RAN,EEF2,KRT78,NCL,DDX3X,PRDX2,RPL12,SERBP1,DDX5,PDIA6,RPS15A,PSMA5,RPL31,PSMC5,HSPH1,PAICS,RPSA,PTBP1,SHMT2,TAOK1,ENO1,HSPA5,HSPA4,MYH9,RPS2,RPL23,GAPDH,ALDOA,KRT2,EEF1G,PKM,RPL3,CCT3,KRT10,PHB,HSPD1,HSPA9,ACLY,ACTG1,KRT9,CCT2,KRT1,FASN,TUBA1A,HSP…
GO:CC	extracellular vesicle	GO:1903561	FALSE	4.779369454850151e-30	29.320629396346558	2133	163	74	22090	MIF,ALB,VIM,IQGAP1,PPP1CB,VTN,CAD,PSMB2,PRDX4,RPS26,PRDX6,RPS8,PFN1,KRT6A,HNRNPM,HIST1H2BN,EIF4A1,HNRNPA2B1,HNRNPK,CKB,TUBB,PDIA3,HNRNPA1,RPL23A,CKAP4,RAN,EEF2,KRT78,NCL,DDX3X,PRDX2,RPL12,SERBP1,DDX5,PDIA6,RPS15A,PSMA5,RPL31,PSMC5,HSPH1,PAICS,RPSA,PTBP1,SHMT2,TAOK1,ENO1,HSPA5,HSPA4,MYH9,RPS2,RPL23,GAPDH,ALDOA,KRT2,EEF1G,PKM,RPL3,CCT3,KRT10,PHB,HSPD1,HSPA9,ACLY,ACTG1,KRT9,CCT2,KRT1,FASN,TUBA1A,HSP…
GO:CC	extracellular membrane-bounded organelle	GO:0065010	FALSE	4.9293434997988914e-30	29.307210917112208	2134	163	74	22090	MIF,ALB,VIM,IQGAP1,PPP1CB,VTN,CAD,PSMB2,PRDX4,RPS26,PRDX6,RPS8,PFN1,KRT6A,HNRNPM,HIST1H2BN,EIF4A1,HNRNPA2B1,HNRNPK,CKB,TUBB,PDIA3,HNRNPA1,RPL23A,CKAP4,RAN,EEF2,KRT78,NCL,DDX3X,PRDX2,RPL12,SERBP1,DDX5,PDIA6,RPS15A,PSMA5,RPL31,PSMC5,HSPH1,PAICS,RPSA,PTBP1,SHMT2,TAOK1,ENO1,HSPA5,HSPA4,MYH9,RPS2,RPL23,GAPDH,ALDOA,KRT2,EEF1G,PKM,RPL3,CCT3,KRT10,PHB,HSPD1,HSPA9,ACLY,ACTG1,KRT9,CCT2,KRT1,FASN,TUBA1A,HSP…
GO:CC	extracellular organelle	GO:0043230	FALSE	4.9293434997988914e-30	29.307210917112208	2134	163	74	22090	MIF,ALB,VIM,IQGAP1,PPP1CB,VTN,CAD,PSMB2,PRDX4,RPS26,PRDX6,RPS8,PFN1,KRT6A,HNRNPM,HIST1H2BN,EIF4A1,HNRNPA2B1,HNRNPK,CKB,TUBB,PDIA3,HNRNPA1,RPL23A,CKAP4,RAN,EEF2,KRT78,NCL,DDX3X,PRDX2,RPL12,SERBP1,DDX5,PDIA6,RPS15A,PSMA5,RPL31,PSMC5,HSPH1,PAICS,RPSA,PTBP1,SHMT2,TAOK1,ENO1,HSPA5,HSPA4,MYH9,RPS2,RPL23,GAPDH,ALDOA,KRT2,EEF1G,PKM,RPL3,CCT3,KRT10,PHB,HSPD1,HSPA9,ACLY,ACTG1,KRT9,CCT2,KRT1,FASN,TUBA1A,HSP…
GO:CC	organelle lumen	GO:0043233	FALSE	1.401678999221963e-29	28.853351433465292	6656	163	122	22090	MIF,SON,ALB,NOP58,SYNCRIP,VIM,GTF3C1,PPP1CB,VTN,CAD,TCERG1,PSMB2,PUF60,EIF4A3,PRDX4,MRPL15,RPS26,PRDX6,NOP56,DDX18,RPS7,RPS8,DDX56,SERPINH1,SRP14,RPS6,HNRNPM,HIST1H2BN,EIF4A1,HNRNPA2B1,HNRNPK,TUBB,FTSJ3,PDIA3,HNRNPA1,RPL23A,CKAP4,TCOF1,HNRNPU,SFPQ,RAN,NAT10,SMARCA4,EEF2,TOP1,C1QBP,NCL,DDX3X,RBM39,SNRPE,RPS24,RPL12,SNW1,TTF1,IGF2BP1,KNOP1,DDX5,PDIA6,RPS15A,CDC5L,PSMA5,DNMT1,PSMC5,PRMT1,PPM1G,FLG2,…
GO:CC	intracellular organelle lumen	GO:0070013	TRUE	1.401678999221963e-29	28.853351433465292	6656	163	122	22090	MIF,SON,ALB,NOP58,SYNCRIP,VIM,GTF3C1,PPP1CB,VTN,CAD,TCERG1,PSMB2,PUF60,EIF4A3,PRDX4,MRPL15,RPS26,PRDX6,NOP56,DDX18,RPS7,RPS8,DDX56,SERPINH1,SRP14,RPS6,HNRNPM,HIST1H2BN,EIF4A1,HNRNPA2B1,HNRNPK,TUBB,FTSJ3,PDIA3,HNRNPA1,RPL23A,CKAP4,TCOF1,HNRNPU,SFPQ,RAN,NAT10,SMARCA4,EEF2,TOP1,C1QBP,NCL,DDX3X,RBM39,SNRPE,RPS24,RPL12,SNW1,TTF1,IGF2BP1,KNOP1,DDX5,PDIA6,RPS15A,CDC5L,PSMA5,DNMT1,PSMC5,PRMT1,PPM1G,FLG2,…
GO:CC	membrane-enclosed lumen	GO:0031974	FALSE	1.401678999221963e-29	28.853351433465292	6656	163	122	22090	MIF,SON,ALB,NOP58,SYNCRIP,VIM,GTF3C1,PPP1CB,VTN,CAD,TCERG1,PSMB2,PUF60,EIF4A3,PRDX4,MRPL15,RPS26,PRDX6,NOP56,DDX18,RPS7,RPS8,DDX56,SERPINH1,SRP14,RPS6,HNRNPM,HIST1H2BN,EIF4A1,HNRNPA2B1,HNRNPK,TUBB,FTSJ3,PDIA3,HNRNPA1,RPL23A,CKAP4,TCOF1,HNRNPU,SFPQ,RAN,NAT10,SMARCA4,EEF2,TOP1,C1QBP,NCL,DDX3X,RBM39,SNRPE,RPS24,RPL12,SNW1,TTF1,IGF2BP1,KNOP1,DDX5,PDIA6,RPS15A,CDC5L,PSMA5,DNMT1,PSMC5,PRMT1,PPM1G,FLG2,…
GO:CC	cytosol	GO:0005829	FALSE	6.609215518409954e-26	25.179850086088397	5457	163	107	22090	MIF,NOP58,SYNCRIP,VIM,IQGAP1,GYS1,PPP1CB,CAD,PSMB2,EIF4A3,PRDX4,RPS26,HDLBP,UBR2,MAT1A,EIF5A,PRDX6,RPS7,RPS8,DDX56,PFN1,KRT6A,SRP14,RPS6,HIST1H2BN,EIF4A1,CKB,TUBB,HNRNPA1,RPL23A,TCOF1,HNRNPU,SFPQ,RAN,NME1-NME2,EEF2,KRT78,C1QBP,DDX3X,SNRPE,PRDX2,RPS24,RPL12,SERBP1,IGF2BP1,DDX5,PDIA6,RPS15A,PSMA5,RPL31,PSMC5,PRMT1,DENND3,UNC45A,HSPH1,PAICS,SRPK1,RPSA,SHMT2,ABCE1,GTPBP4,RPL10,TAOK1,ENO1,HSPA5,PARP1,…
GO:CC	extracellular space	GO:0005615	FALSE	8.066178034677995e-22	21.093332196582683	3284	163	79	22090	MIF,ALB,VIM,IQGAP1,PPP1CB,VTN,CAD,PSMB2,PRDX4,RPS26,HDLBP,PRDX6,RPS8,SERPINH1,PFN1,KRT6A,HNRNPM,HIST1H2BN,EIF4A1,HNRNPA2B1,HNRNPK,CKB,TUBB,PDIA3,HNRNPA1,RPL23A,CKAP4,RAN,SMARCA4,EEF2,KRT78,NCL,DDX3X,PRDX2,RPL12,SERBP1,DDX5,PDIA6,RPS15A,PSMA5,RPL31,PSMC5,HSPH1,PAICS,RPSA,PTBP1,SHMT2,TAOK1,ENO1,HSPA5,HSPA4,TCEB3,MYH9,RPS2,RPL23,GAPDH,ALDOA,KRT2,EEF1G,PKM,RPL3,CCT3,KRT10,GNL3,PHB,HSPD1,HSPA9,ACLY,AC…
GO:CC	nucleus	GO:0005634	FALSE	3.3857142806651407e-18	17.47034969465182	10063	163	132	22090	MIF,SON,ALB,NOP58,SYNCRIP,VIM,IQGAP1,GTF3C1,PPP1CB,CAD,TCERG1,PSMB2,PUF60,EIF4A3,PRDX4,RPS26,HDLBP,UBR2,EIF5A,PRDX6,NOP56,DDX18,RPS7,RPS8,DDX56,PFN1,KRT6A,SRP14,RPS6,HNRNPM,HIST1H2BN,EIF4A1,HNRNPA2B1,HNRNPK,TUBB,FTSJ3,PDIA3,HNRNPA1,RPL23A,TCOF1,HNRNPU,SFPQ,RAN,NAT10,SMARCA4,EEF2,TOP1,C1QBP,NCL,DDX3X,RBM39,SNRPE,RPS24,RPL12,SERBP1,SNW1,TTF1,IGF2BP1,NAP1L1,KNOP1,DDX5,RPS15A,CDC5L,PSMA5,DNMT1,RSBN1L…
GO:CC	nuclear lumen	GO:0031981	FALSE	4.348883424302136e-17	16.36162223382946	5520	163	95	22090	MIF,SON,NOP58,SYNCRIP,VIM,GTF3C1,PPP1CB,CAD,TCERG1,PSMB2,PUF60,EIF4A3,RPS26,NOP56,DDX18,RPS7,RPS8,DDX56,RPS6,HNRNPM,HIST1H2BN,EIF4A1,HNRNPA2B1,HNRNPK,FTSJ3,HNRNPA1,RPL23A,TCOF1,HNRNPU,SFPQ,RAN,NAT10,SMARCA4,TOP1,C1QBP,NCL,DDX3X,RBM39,SNRPE,RPS24,RPL12,SNW1,TTF1,IGF2BP1,KNOP1,DDX5,RPS15A,CDC5L,PSMA5,DNMT1,PSMC5,PRMT1,PPM1G,UNC45A,NAF1,HSPH1,MYBBP1A,LUC7L3,SRPK1,RPSA,DHX16,PTBP1,GTPBP4,NOL9,LYAR,PA…
GO:CC	extracellular region	GO:0005576	FALSE	6.322490047623002e-17	16.199111845615953	4206	163	82	22090	MIF,ALB,VIM,IQGAP1,PPP1CB,VTN,CAD,PSMB2,PRDX4,RPS26,HDLBP,PRDX6,RPS8,SERPINH1,PFN1,KRT6A,SRP14,HNRNPM,HIST1H2BN,EIF4A1,HNRNPA2B1,HNRNPK,CKB,TUBB,PDIA3,HNRNPA1,RPL23A,CKAP4,RAN,SMARCA4,EEF2,KRT78,C1QBP,NCL,DDX3X,PRDX2,RPL12,SERBP1,DDX5,PDIA6,RPS15A,PSMA5,RPL31,PSMC5,FLG2,HSPH1,PAICS,RPSA,PTBP1,SHMT2,TAOK1,ENO1,HSPA5,HSPA4,TCEB3,MYH9,RPS2,RPL23,GAPDH,ALDOA,KRT2,EEF1G,PKM,RPL3,CCT3,KRT10,GNL3,PHB,HS…
GO:CC	vesicle	GO:0031982	FALSE	1.561757265213231e-16	15.806386465061994	3976	163	79	22090	MIF,ALB,VIM,IQGAP1,PPP1CB,VTN,CAD,PSMB2,PRDX4,RPS26,PRDX6,RPS8,PFN1,KRT6A,SRP14,HNRNPM,HIST1H2BN,EIF4A1,HNRNPA2B1,HNRNPK,CKB,TUBB,PDIA3,HNRNPA1,RPL23A,CKAP4,RAN,EEF2,KRT78,NCL,DDX3X,AP3D1,PRDX2,RPL12,SERBP1,NAP1L1,DDX5,PDIA6,RPS15A,PSMA5,RPL31,PSMC5,FLG2,DENND3,HSPH1,PAICS,RPSA,PTBP1,SHMT2,TAOK1,ENO1,HSPA5,HSPA4,MYH9,RPS2,RPL23,GAPDH,ALDOA,KRT2,EEF1G,PKM,RPL3,CCT3,KRT10,PHB,HSPD1,HSPA9,ACLY,ACTG1…
GO:CC	intracellular non-membrane-bounded organelle	GO:0043232	FALSE	2.536852188482292e-16	15.595704836521515	6568	163	103	22090	NOP58,VIM,IQGAP1,GTF3C1,PPP1CB,EIF4A3,MRPL15,RPS26,UBR2,NOP56,DDX18,RPS7,RPS8,DDX56,PFN1,KRT6A,RPS6,HNRNPM,HIST1H2BN,EIF4A1,HNRNPA2B1,HNRNPK,TUBB,FTSJ3,HNRNPA1,RPL23A,CKAP4,TCOF1,HNRNPU,SFPQ,RAN,NAT10,SMARCA4,TOP1,KRT78,C1QBP,NCL,DDX3X,RBM39,RPS24,RPL12,TTF1,IGF2BP1,NAP1L1,KNOP1,DDX5,RPS15A,CDC5L,DNMT1,RPL31,HSPH1,MYBBP1A,SRPK1,RPSA,PTBP1,SHMT2,ABCE1,GTPBP4,RPL10,NOL9,TAOK1,LYAR,ENO1,PARP1,TCEB3,…
GO:CC	non-membrane-bounded organelle	GO:0043228	FALSE	2.567475833233125e-16	15.590493635576017	6569	163	103	22090	NOP58,VIM,IQGAP1,GTF3C1,PPP1CB,EIF4A3,MRPL15,RPS26,UBR2,NOP56,DDX18,RPS7,RPS8,DDX56,PFN1,KRT6A,RPS6,HNRNPM,HIST1H2BN,EIF4A1,HNRNPA2B1,HNRNPK,TUBB,FTSJ3,HNRNPA1,RPL23A,CKAP4,TCOF1,HNRNPU,SFPQ,RAN,NAT10,SMARCA4,TOP1,KRT78,C1QBP,NCL,DDX3X,RBM39,RPS24,RPL12,TTF1,IGF2BP1,NAP1L1,KNOP1,DDX5,RPS15A,CDC5L,DNMT1,RPL31,HSPH1,MYBBP1A,SRPK1,RPSA,PTBP1,SHMT2,ABCE1,GTPBP4,RPL10,NOL9,TAOK1,LYAR,ENO1,PARP1,TCEB3,…
GO:CC	nucleoplasm	GO:0005654	FALSE	3.4367415464377976e-16	15.463853126919036	4221	163	81	22090	MIF,SON,NOP58,SYNCRIP,GTF3C1,PPP1CB,TCERG1,PSMB2,PUF60,EIF4A3,RPS26,NOP56,RPS7,RPS8,RPS6,HNRNPM,HIST1H2BN,HNRNPA2B1,HNRNPK,FTSJ3,HNRNPA1,TCOF1,HNRNPU,SFPQ,RAN,NAT10,SMARCA4,TOP1,NCL,DDX3X,RBM39,SNRPE,RPS24,SNW1,TTF1,IGF2BP1,DDX5,RPS15A,CDC5L,PSMA5,DNMT1,PSMC5,PRMT1,PPM1G,UNC45A,NAF1,HSPH1,MYBBP1A,LUC7L3,SRPK1,RPSA,DHX16,PTBP1,GTPBP4,NOL9,LYAR,PARP1,SRRM2,TCEB3,MYH9,RPS2,RPL23,PRPF4B,ABCF1,NPM1,RR…
GO:CC	cytosolic ribosome	GO:0022626	FALSE	1.6068685014887155e-15	14.794019662386956	110	163	17	22090	RPS26,RPS7,RPS8,RPS6,RPL23A,DDX3X,RPS24,RPL12,RPS15A,RPL31,RPSA,ABCE1,RPL10,RPS2,RPL23,RPL3,RPS3
GO:CC	membrane-bounded organelle	GO:0043227	FALSE	1.0196610814610717e-14	13.991544156581613	15624	163	157	22090	MIF,SON,ALB,NOP58,SYNCRIP,VIM,IQGAP1,GTF3C1,PPP1CB,VTN,CAD,TCERG1,PSMB2,PUF60,EIF4A3,PRDX4,MRPL15,RPS26,HDLBP,UBR2,EIF5A,PRDX6,NOP56,DDX18,RPS7,RPS8,DDX56,SERPINH1,PFN1,KRT6A,SRP14,RPS6,HNRNPM,HIST1H2BN,EIF4A1,HNRNPA2B1,HNRNPK,CKB,TUBB,FTSJ3,PDIA3,HNRNPA1,RPL23A,CKAP4,TCOF1,HNRNPU,SFPQ,RAN,NAT10,SMARCA4,EEF2,TOP1,KRT78,C1QBP,NCL,DDX3X,RBM39,AP3D1,SNRPE,PRDX2,RPS24,RPL12,SERBP1,SNW1,TTF1,IGF2BP1,N…
GO:CC	intracellular membrane-bounded organelle	GO:0043231	FALSE	1.6509147203427228e-13	12.782275360075266	14560	163	151	22090	MIF,SON,ALB,NOP58,SYNCRIP,VIM,IQGAP1,GTF3C1,PPP1CB,VTN,CAD,TCERG1,PSMB2,PUF60,EIF4A3,PRDX4,MRPL15,RPS26,HDLBP,UBR2,EIF5A,PRDX6,NOP56,DDX18,RPS7,RPS8,DDX56,SERPINH1,PFN1,KRT6A,SRP14,RPS6,HNRNPM,HIST1H2BN,EIF4A1,HNRNPA2B1,HNRNPK,CKB,TUBB,FTSJ3,PDIA3,HNRNPA1,RPL23A,CKAP4,TCOF1,HNRNPU,SFPQ,RAN,NAT10,SMARCA4,EEF2,TOP1,C1QBP,NCL,DDX3X,RBM39,AP3D1,SNRPE,RPS24,RPL12,SERBP1,SNW1,TTF1,IGF2BP1,NAP1L1,KNOP1,…
GO:CC	catalytic step 2 spliceosome	GO:0071013	FALSE	7.12666803998639e-13	12.147113470157691	86	163	14	22090	SYNCRIP,EIF4A3,HNRNPM,HNRNPA2B1,HNRNPK,HNRNPA1,HNRNPU,SNRPE,SNW1,DDX5,CDC5L,SRRM2,PRPF4B,SNRNP200
GO:CC	ribosomal subunit	GO:0044391	FALSE	1.085500751242893e-12	11.96436987164712	189	163	18	22090	MRPL15,RPS26,RPS7,RPS8,RPS6,RPL23A,DDX3X,RPS24,RPL12,RPS15A,RPL31,RPSA,RPL10,RPS2,RPL23,RPL3,NPM1,RPS3
GO:CC	spliceosomal complex	GO:0005681	FALSE	3.5019991459952605e-12	11.455683964160508	202	163	18	22090	SYNCRIP,EIF4A3,HNRNPM,HNRNPA2B1,HNRNPK,HNRNPA1,HNRNPU,NCL,SNRPE,SNW1,DDX5,CDC5L,LUC7L3,DHX16,SRRM2,PRPF4B,SNRNP200,DHX15
GO:CC	intracellular anatomical structure	GO:0005622	FALSE	4.381243562322913e-12	11.358402602828995	17772	163	162	22090	MIF,SON,ALB,NOP58,SYNCRIP,VIM,IQGAP1,GYS1,GTF3C1,PPP1CB,VTN,CAD,TCERG1,PSMB2,PUF60,EIF4A3,PRDX4,MRPL15,RPS26,HDLBP,UBR2,MAT1A,EIF5A,PRDX6,NOP56,DDX18,RPS7,RPS8,DDX56,SERPINH1,PFN1,KRT6A,SRP14,RPS6,HNRNPM,HIST1H2BN,EIF4A1,HNRNPA2B1,HNRNPK,CKB,TUBB,FTSJ3,PDIA3,HNRNPA1,RPL23A,CKAP4,TCOF1,HNRNPU,SFPQ,RAN,NAT10,NME1-NME2,SMARCA4,EEF2,TOP1,KRT78,C1QBP,NCL,DDX3X,RBM39,AP3D1,SNRPE,PRDX2,RPS24,RPL12,SERBP…
GO:CC	ribonucleoprotein complex	GO:1990904	FALSE	5.033952871494521e-12	11.298090854688665	2817	163	59	22090	NOP58,SYNCRIP,VIM,IQGAP1,GTF3C1,PUF60,EIF4A3,MRPL15,RPS26,HDLBP,NOP56,RPS7,RPS8,SRP14,RPS6,HNRNPM,HNRNPA2B1,HNRNPK,FTSJ3,HNRNPA1,RPL23A,HNRNPU,NAT10,EEF2,NCL,DDX3X,SNRPE,RPS24,RPL12,SNW1,IGF2BP1,DDX5,RPS15A,CDC5L,RPL31,NAF1,LUC7L3,RPSA,DHX16,RPL10,SRRM2,RPS2,HSD17B10,RPL23,PRPF4B,GAPDH,RPL3,ABCF1,NPM1,RRP1B,DDX17,TSR1,HSPA1B,SNRNP200,DHX9,EXOSC10,FBL,DHX15,RPS3
GO:CC	nucleolus	GO:0005730	FALSE	5.324998464733106e-12	11.273680513102	1996	163	49	22090	NOP58,GTF3C1,PPP1CB,EIF4A3,NOP56,DDX18,RPS7,RPS8,DDX56,RPS6,HNRNPM,EIF4A1,FTSJ3,RPL23A,TCOF1,RAN,NAT10,SMARCA4,TOP1,C1QBP,NCL,RPS24,RPL12,TTF1,KNOP1,DDX5,RPS15A,MYBBP1A,PTBP1,GTPBP4,NOL9,LYAR,PARP1,RPL23,RPL3,NPM1,RRP1B,DDX17,GNL3,HSPA9,TSR1,ACACA,DHX9,EZR,EXOSC10,FBL,DHX15,DDX50,RPS3
GO:CC	intracellular organelle	GO:0043229	FALSE	1.575824842451968e-11	10.802492057267857	15969	163	155	22090	MIF,SON,ALB,NOP58,SYNCRIP,VIM,IQGAP1,GTF3C1,PPP1CB,VTN,CAD,TCERG1,PSMB2,PUF60,EIF4A3,PRDX4,MRPL15,RPS26,HDLBP,UBR2,EIF5A,PRDX6,NOP56,DDX18,RPS7,RPS8,DDX56,SERPINH1,PFN1,KRT6A,SRP14,RPS6,HNRNPM,HIST1H2BN,EIF4A1,HNRNPA2B1,HNRNPK,CKB,TUBB,FTSJ3,PDIA3,HNRNPA1,RPL23A,CKAP4,TCOF1,HNRNPU,SFPQ,RAN,NAT10,SMARCA4,EEF2,TOP1,KRT78,C1QBP,NCL,DDX3X,RBM39,AP3D1,SNRPE,RPS24,RPL12,SERBP1,SNW1,TTF1,IGF2BP1,NAP1L1,…
GO:CC	protein-containing complex	GO:0032991	FALSE	2.0833842213683644e-11	10.681230629316596	8527	163	110	22090	ALB,NOP58,SYNCRIP,VIM,IQGAP1,GTF3C1,PPP1CB,VTN,CAD,PSMB2,PUF60,EIF4A3,MRPL15,RPS26,HDLBP,UBR2,MAT1A,EIF5A,NOP56,RPS7,RPS8,SERPINH1,SRP14,RPS6,HNRNPM,HIST1H2BN,EIF4A1,HNRNPA2B1,HNRNPK,TUBB,FTSJ3,PDIA3,HNRNPA1,RPL23A,HNRNPU,SFPQ,RAN,NAT10,SMARCA4,EEF2,TOP1,NCL,DDX3X,RBM39,AP3D1,SNRPE,RPS24,RPL12,SNW1,IGF2BP1,NAP1L1,DDX5,PDIA6,RPS15A,CDC5L,PSMA5,DNMT1,RPL31,PSMC5,PRMT1,NAF1,TOMM22,HSPH1,MYBBP1A,LUC7…
GO:CC	cytoplasm	GO:0005737	FALSE	1.285085996562002e-10	9.891067808844225	12251	163	134	22090	MIF,ALB,NOP58,SYNCRIP,VIM,IQGAP1,GYS1,PPP1CB,VTN,CAD,PSMB2,EIF4A3,PRDX4,MRPL15,RPS26,HDLBP,UBR2,MAT1A,EIF5A,PRDX6,NOP56,RPS7,RPS8,DDX56,SERPINH1,PFN1,KRT6A,SRP14,RPS6,HIST1H2BN,EIF4A1,HNRNPA2B1,HNRNPK,CKB,TUBB,PDIA3,HNRNPA1,RPL23A,CKAP4,TCOF1,HNRNPU,SFPQ,RAN,NME1-NME2,EEF2,TOP1,KRT78,C1QBP,NCL,DDX3X,AP3D1,SNRPE,PRDX2,RPS24,RPL12,SERBP1,IGF2BP1,NAP1L1,DDX5,PDIA6,RPS15A,CDC5L,PSMA5,RPL31,PSMC5,PRMT…
GO:CC	organelle	GO:0043226	FALSE	2.2289265633341143e-10	9.651904240027681	16766	163	157	22090	MIF,SON,ALB,NOP58,SYNCRIP,VIM,IQGAP1,GTF3C1,PPP1CB,VTN,CAD,TCERG1,PSMB2,PUF60,EIF4A3,PRDX4,MRPL15,RPS26,HDLBP,UBR2,EIF5A,PRDX6,NOP56,DDX18,RPS7,RPS8,DDX56,SERPINH1,PFN1,KRT6A,SRP14,RPS6,HNRNPM,HIST1H2BN,EIF4A1,HNRNPA2B1,HNRNPK,CKB,TUBB,FTSJ3,PDIA3,HNRNPA1,RPL23A,CKAP4,TCOF1,HNRNPU,SFPQ,RAN,NAT10,SMARCA4,EEF2,TOP1,KRT78,C1QBP,NCL,DDX3X,RBM39,AP3D1,SNRPE,PRDX2,RPS24,RPL12,SERBP1,SNW1,TTF1,IGF2BP1,N…
GO:CC	cytosolic small ribosomal subunit	GO:0022627	FALSE	2.2353257815275423e-10	9.650659172841202	44	163	10	22090	RPS26,RPS7,RPS8,RPS6,DDX3X,RPS24,RPS15A,RPSA,RPS2,RPS3
GO:CC	preribosome	GO:0030684	FALSE	4.1116995601126283e-10	9.385978626540053	108	163	13	22090	NOP58,NOP56,RPS7,RPS8,RPS6,FTSJ3,NAT10,RPS24,RPS15A,RRP1B,TSR1,EXOSC10,FBL
GO:CC	focal adhesion	GO:0005925	TRUE	1.7441558973436398e-9	8.758414699260015	421	163	21	22090	VIM,IQGAP1,PPP1CB,RPS7,RPS8,PFN1,HNRNPK,PDIA3,RPL12,RPL31,HSPA5,MYH9,RPS2,RPL23,RPL3,NPM1,HSPA9,ACTG1,HSPA1B,EZR,RPS3
GO:CC	cell-substrate junction	GO:0030055	FALSE	2.7152187687568246e-9	8.566195172986275	431	163	21	22090	VIM,IQGAP1,PPP1CB,RPS7,RPS8,PFN1,HNRNPK,PDIA3,RPL12,RPL31,HSPA5,MYH9,RPS2,RPL23,RPL3,NPM1,HSPA9,ACTG1,HSPA1B,EZR,RPS3
GO:CC	small ribosomal subunit	GO:0015935	FALSE	4.547195896774929e-9	8.342256335644077	79	163	11	22090	RPS26,RPS7,RPS8,RPS6,DDX3X,RPS24,RPS15A,RPSA,RPS2,NPM1,RPS3
GO:CC	small-subunit processome	GO:0032040	FALSE	4.660660717750263e-8	7.331552511264368	73	163	10	22090	NOP58,NOP56,RPS7,RPS8,RPS6,NAT10,RPS24,RPS15A,EXOSC10,FBL
GO:CC	ribosome	GO:0005840	FALSE	1.0052892038738599e-7	6.99770898144903	524	163	21	22090	MRPL15,RPS26,RPS7,RPS8,RPS6,RPL23A,DDX3X,RPS24,RPL12,RPS15A,RPL31,RPSA,ABCE1,RPL10,RPS2,RPL23,RPL3,ABCF1,NPM1,DHX9,RPS3
GO:CC	nuclear body	GO:0016604	FALSE	1.1884190839337826e-7	6.925030382801907	888	163	27	22090	SON,NOP58,TCERG1,EIF4A3,HNRNPM,HNRNPA2B1,HNRNPU,SFPQ,RBM39,SNW1,DDX5,CDC5L,UNC45A,LUC7L3,SRPK1,PARP1,SRRM2,MYH9,PRPF4B,NPM1,DDX17,GNL3,HSPA1B,RPA1,DHX9,FBL,DHX15
GO:CC	ficolin-1-rich granule lumen	GO:1904813	FALSE	6.400634185542943e-7	6.193776993260386	124	163	11	22090	MIF,PRDX4,SRP14,EEF2,DDX3X,PSMA5,ALDOA,PKM,ACLY,KRT1,HSPA1B
GO:CC	nuclear speck	GO:0016607	FALSE	6.562679010259941e-7	6.182918837169562	418	163	18	22090	SON,TCERG1,EIF4A3,HNRNPU,SFPQ,RBM39,SNW1,DDX5,CDC5L,UNC45A,LUC7L3,SRPK1,SRRM2,PRPF4B,NPM1,DDX17,HSPA1B,DHX15
GO:CC	polysome	GO:0005844	FALSE	0.0000010392436597680927	5.983282616363369	73	163	9	22090	VIM,RPS26,HDLBP,RPS6,EEF2,RPL31,ABCF1,DHX9,RPS3
GO:CC	U2-type spliceosomal complex	GO:0005684	FALSE	0.000008253051405567823	5.083385449803423	92	163	9	22090	EIF4A3,SNRPE,SNW1,CDC5L,LUC7L3,DHX16,SRRM2,SNRNP200,DHX15
GO:CC	CRD-mediated mRNA stability complex	GO:0070937	TRUE	0.000013077159287690575	4.883486586261603	6	163	4	22090	SYNCRIP,HNRNPU,IGF2BP1,DHX9
GO:CC	secretory granule lumen	GO:0034774	FALSE	0.00003620778033835836	4.441198098114496	320	163	14	22090	MIF,ALB,PRDX4,PRDX6,SRP14,TUBB,EEF2,DDX3X,PSMA5,ALDOA,PKM,ACLY,CCT2,CREG1
GO:CC	supramolecular complex	GO:0099080	FALSE	0.00003816815436865058	4.418298839969421	1404	163	30	22090	VIM,IQGAP1,KRT6A,RPS6,HNRNPK,TUBB,HNRNPU,SMARCA4,TOP1,KRT78,NCL,DDX3X,IGF2BP1,HSPH1,ENO1,MYH9,CTPS1,ALDOA,KRT2,CCT3,KRT10,ACTG1,KRT9,CCT2,KRT1,TUBB2B,TUBA1A,DHX9,EZR,CASP14
GO:CC	ficolin-1-rich granule	GO:0101002	FALSE	0.000039148007064898124	4.407290341977634	184	163	11	22090	MIF,PRDX4,SRP14,EEF2,DDX3X,PSMA5,ALDOA,PKM,ACLY,KRT1,HSPA1B
GO:CC	cytoplasmic vesicle lumen	GO:0060205	FALSE	0.000040593687581154545	4.391541495038865	323	163	14	22090	MIF,ALB,PRDX4,PRDX6,SRP14,TUBB,EEF2,DDX3X,PSMA5,ALDOA,PKM,ACLY,CCT2,CREG1
GO:CC	vesicle lumen	GO:0031983	FALSE	0.00004215884517851392	4.375111293892947	324	163	14	22090	MIF,ALB,PRDX4,PRDX6,SRP14,TUBB,EEF2,DDX3X,PSMA5,ALDOA,PKM,ACLY,CCT2,CREG1
GO:CC	nuclear matrix	GO:0016363	FALSE	0.00014445000814575085	3.8402824293292714	128	163	9	22090	VIM,CAD,HNRNPM,HNRNPA2B1,HNRNPU,SFPQ,SMARCA4,SNW1,SRPK1
GO:CC	membrane	GO:0016020	TRUE	0.0001784937485378815	3.7483769897649264	9853	163	104	22090	MIF,NOP58,SYNCRIP,VIM,IQGAP1,GYS1,GTF3C1,VTN,CAD,PSMB2,EIF4A3,MRPL15,RPS26,HDLBP,EIF5A,PRDX6,NOP56,DDX18,RPS7,RPS8,DDX56,SERPINH1,PFN1,KRT6A,RPS6,HNRNPM,EIF4A1,HNRNPA2B1,HNRNPK,CKB,TUBB,PDIA3,HNRNPA1,CKAP4,HNRNPU,RAN,NAT10,SMARCA4,EEF2,C1QBP,NCL,DDX3X,AP3D1,RPS24,RPL12,SERBP1,NAP1L1,DDX5,PDIA6,RPS15A,CDC5L,RPL31,PSMC5,PPM1G,FLG2,TOMM22,PAICS,MYBBP1A,SRPK1,RPSA,PTBP1,SHMT2,ABCE1,GTPBP4,RPL10,NOL9,…
GO:CC	catalytic complex	GO:1902494	FALSE	0.000214608959909748	3.668352150225933	1781	163	33	22090	SYNCRIP,PPP1CB,PSMB2,EIF4A3,UBR2,MAT1A,HNRNPM,HNRNPA2B1,HNRNPK,HNRNPA1,HNRNPU,NAT10,SMARCA4,SNRPE,SNW1,DDX5,CDC5L,PSMA5,PSMC5,PRMT1,MYBBP1A,ENO1,SRRM2,HSD17B10,PRPF4B,CHD4,PCCB,MCCC1,PCCA,SNRNP200,DHX9,EXOSC10,ATAD5
GO:CC	secretory granule	GO:0030141	FALSE	0.0005775404711588736	3.2384175771758574	871	163	21	22090	MIF,ALB,IQGAP1,PRDX4,PRDX6,SRP14,TUBB,CKAP4,EEF2,DDX3X,PSMA5,FLG2,MYH9,ALDOA,PKM,HSPD1,ACLY,CCT2,KRT1,HSPA1B,CREG1
GO:CC	nuclear periphery	GO:0034399	FALSE	0.0005785655160214159	3.2376474549740957	151	163	9	22090	VIM,CAD,HNRNPM,HNRNPA2B1,HNRNPU,SFPQ,SMARCA4,SNW1,SRPK1
GO:CC	fibrillar center	GO:0001650	FALSE	0.0005785655160214159	3.2376474549740957	151	163	9	22090	NOP58,NOP56,TCOF1,SMARCA4,TOP1,TTF1,ACACA,EZR,FBL
GO:CC	large ribosomal subunit	GO:0015934	FALSE	0.0006475747669991953	3.1887100820411325	114	163	8	22090	MRPL15,RPL23A,RPL12,RPL31,RPL10,RPL23,RPL3,NPM1
GO:CC	cytosolic large ribosomal subunit	GO:0022625	FALSE	0.0008754084002370719	3.0577892903033215	54	163	6	22090	RPL23A,RPL12,RPL31,RPL10,RPL23,RPL3
GO:CC	cytoplasmic ribonucleoprotein granule	GO:0036464	FALSE	0.0009865834553401984	3.0058661717795165	255	163	11	22090	IQGAP1,RPS6,HNRNPK,TUBB,HNRNPU,TOP1,NCL,DDX3X,IGF2BP1,TUBA1A,DHX9
GO:CC	anchoring junction	GO:0070161	FALSE	0.0010157699933086017	2.9932046207385463	903	163	21	22090	VIM,IQGAP1,PPP1CB,RPS7,RPS8,PFN1,HNRNPK,PDIA3,RPL12,RPL31,HSPA5,MYH9,RPS2,RPL23,RPL3,NPM1,HSPA9,ACTG1,HSPA1B,EZR,RPS3
GO:CC	cytoskeleton	GO:0005856	FALSE	0.0013218775279950177	2.8788087803873323	2407	163	38	22090	VIM,IQGAP1,RPS7,PFN1,KRT6A,HNRNPK,TUBB,CKAP4,HNRNPU,RAN,KRT78,DDX3X,RBM39,HSPH1,SHMT2,NOL9,TAOK1,MYH9,GAPDH,ALDOA,KRT2,CCT3,KRT10,NPM1,CHD4,ACTG1,KRT9,CCT2,KRT1,TUBB2B,TUBA1A,HSPA1B,ACACA,DHX9,EZR,CASP14,RPS3,RABL6
GO:CC	cornified envelope	GO:0001533	TRUE	0.0013389219595826417	2.873244735542386	58	163	6	22090	NCL,FLG2,KRT2,KRT10,KRT1,CASP14
GO:CC	ribonucleoprotein granule	GO:0035770	FALSE	0.0018273774254988898	2.738171744446587	272	163	11	22090	IQGAP1,RPS6,HNRNPK,TUBB,HNRNPU,TOP1,NCL,DDX3X,IGF2BP1,TUBA1A,DHX9
GO:CC	box C/D RNP complex	GO:0031428	FALSE	0.0023954643291006074	2.6206102918440797	6	163	3	22090	NOP58,NOP56,FBL
GO:CC	supramolecular fiber	GO:0099512	FALSE	0.0024081021851848385	2.618325088211423	1034	163	22	22090	VIM,IQGAP1,KRT6A,TUBB,HNRNPU,KRT78,HSPH1,ENO1,MYH9,CTPS1,ALDOA,KRT2,CCT3,KRT10,ACTG1,KRT9,CCT2,KRT1,TUBB2B,TUBA1A,EZR,CASP14
GO:CC	keratin filament	GO:0045095	TRUE	0.0025450993671632762	2.594295257033215	98	163	7	22090	KRT6A,KRT78,KRT2,KRT10,KRT9,KRT1,CASP14
GO:CC	supramolecular polymer	GO:0099081	FALSE	0.00271745594546457	2.5658374878292394	1042	163	22	22090	VIM,IQGAP1,KRT6A,TUBB,HNRNPU,KRT78,HSPH1,ENO1,MYH9,CTPS1,ALDOA,KRT2,CCT3,KRT10,ACTG1,KRT9,CCT2,KRT1,TUBB2B,TUBA1A,EZR,CASP14
GO:CC	cell junction	GO:0030054	FALSE	0.0033880236966291645	2.470053560773652	2214	163	35	22090	VIM,IQGAP1,PPP1CB,CAD,PUF60,EIF4A3,RPS26,RPS7,RPS8,PFN1,HNRNPM,HNRNPK,PDIA3,EEF2,AP3D1,RPL12,IGF2BP1,RPS15A,RPL31,HSPA5,MYH9,RPS2,RPL23,RPL3,NPM1,EIF5B,CHD4,HSPA9,ACTG1,TUBB2B,TUBA1A,HSPA1B,EZR,PLP1,RPS3
GO:CC	granular component	GO:0001652	FALSE	0.004169309295285795	2.3799358860554256	7	163	3	22090	NPM1,RRP1B,FBL
GO:CC	polymeric cytoskeletal fiber	GO:0099513	FALSE	0.007413038178366734	2.130003763184436	793	163	18	22090	VIM,IQGAP1,KRT6A,TUBB,HNRNPU,KRT78,HSPH1,KRT2,CCT3,KRT10,ACTG1,KRT9,CCT2,KRT1,TUBB2B,TUBA1A,EZR,CASP14
GO:CC	secretory vesicle	GO:0099503	FALSE	0.008446502929441607	2.0733230629799624	1039	163	21	22090	MIF,ALB,IQGAP1,PRDX4,PRDX6,SRP14,TUBB,CKAP4,EEF2,DDX3X,PSMA5,FLG2,MYH9,ALDOA,PKM,HSPD1,ACLY,CCT2,KRT1,HSPA1B,CREG1
GO:CC	sno(s)RNA-containing ribonucleoprotein complex	GO:0005732	FALSE	0.011614840295977077	1.9349867573706532	26	163	4	22090	NOP58,NOP56,NAF1,FBL
GO:CC	cytoplasmic vesicle	GO:0031410	FALSE	0.01503201897577006	1.8229826846726302	2476	163	36	22090	MIF,ALB,VIM,IQGAP1,PRDX4,PRDX6,SRP14,TUBB,PDIA3,CKAP4,RAN,EEF2,DDX3X,AP3D1,NAP1L1,PDIA6,PSMA5,PSMC5,FLG2,DENND3,HSPH1,HSPA5,MYH9,ALDOA,PKM,PHB,HSPD1,ACLY,ACTG1,CCT2,KRT1,FASN,TUBA1A,HSPA1B,CREG1,EZR
GO:CC	intracellular vesicle	GO:0097708	FALSE	0.01568101022663771	1.8046259619499565	2481	163	36	22090	MIF,ALB,VIM,IQGAP1,PRDX4,PRDX6,SRP14,TUBB,PDIA3,CKAP4,RAN,EEF2,DDX3X,AP3D1,NAP1L1,PDIA6,PSMA5,PSMC5,FLG2,DENND3,HSPH1,HSPA5,MYH9,ALDOA,PKM,PHB,HSPD1,ACLY,ACTG1,CCT2,KRT1,FASN,TUBA1A,HSPA1B,CREG1,EZR
GO:CC	U2-type catalytic step 2 spliceosome	GO:0071007	FALSE	0.020807364954982616	1.6817829153659827	30	163	4	22090	SNRPE,SNW1,CDC5L,SRRM2
GO:CC	blood microparticle	GO:0072562	FALSE	0.021249172985664793	1.6726579679549176	136	163	7	22090	ALB,VTN,PFN1,PSMC5,ACTG1,KRT1,HSPA1B
GO:CC	chromosome	GO:0005694	FALSE	0.024911213884742676	1.603605109452623	1942	163	30	22090	PPP1CB,UBR2,DDX18,HIST1H2BN,HNRNPA2B1,HNRNPK,FTSJ3,HNRNPU,SFPQ,RAN,NAT10,SMARCA4,TOP1,NCL,NAP1L1,CDC5L,DNMT1,MYBBP1A,SRPK1,PARP1,TCEB3,PRPF4B,RRP1B,GNL3,CHD4,TUBA1A,RPA1,DHX9,EXOSC10,ATAD5
GO:CC	microtubule cytoskeleton	GO:0015630	FALSE	0.02632431998039264	1.5796428388538737	1388	163	24	22090	VIM,IQGAP1,RPS7,TUBB,HNRNPU,RAN,DDX3X,RBM39,HSPH1,SHMT2,TAOK1,MYH9,GAPDH,CCT3,NPM1,CHD4,CCT2,TUBB2B,TUBA1A,HSPA1B,DHX9,EZR,RPS3,RABL6
GO:CC	polysomal ribosome	GO:0042788	FALSE	0.026990925544234493	1.5687822228216994	32	163	4	22090	RPS26,RPL31,ABCF1,DHX9
GO:CC	intermediate filament cytoskeleton	GO:0045111	FALSE	0.03510605009272113	1.4546180318116584	253	163	9	22090	VIM,KRT6A,KRT78,NOL9,KRT2,KRT10,KRT9,KRT1,CASP14

## Sheet: Table S5 
N: Score	N: Intensity	N: -Log Student's T-test p-value 99CGG_GCrich	N: Student's T-test Difference 99CGG_GCrich	N: Student's T-test Test statistic 99CGG_GCrich	T: Majority protein IDs	T: Protein names	T: Gene names
16.313	18511000	3.14125	1.84183	0.784736	Q9NZI8	Insulin-like growth factor 2 mRNA-binding protein 1	IGF2BP1
72.92	199960000	2.70569	2.60992	1.01224	A0A1X7SBZ2;A0A5H1ZRQ2;A0A1W2PQ51;Q92841	Probable ATP-dependent RNA helicase DDX17	DDX17
27.219	13899000	2.69766	2.66386	1.02766	Q08211	ATP-dependent RNA helicase A	DHX9
7.5312	13561000	2.68109	1.87252	0.774108	P62854	40S ribosomal protein S26	RPS26
39.191	24374000	2.6109	3.30891	1.19849	J3KPX7;Q99623;F5H2D2;F5H0C5;F5H3X6;F5GY37	Prohibitin-2	PHB2
219.23	1103800000	2.59718	1.10367	0.489395	Q14684	Ribosomal RNA processing protein 1 homolog B	RRP1B
49.487	19181000	2.58101	3.10105	1.13943	Q07065	Cytoskeleton-associated protein 4	CKAP4
6.641	6881300	2.1938	1.74609	0.704903	A0A0A0MSM0;Q92598	Heat shock protein 105 kDa	HSPH1
14.103	75728000	2.15735	0.72336	0.328678	Q13523;H0YDJ3	Serine/threonine-protein kinase PRP4 homolog	PRPF4B
52.744	103440000	1.91101	3.07881	1.04129	P30101	Protein disulfide-isomerase A3	PDIA3
6.4888	10262000	1.90105	1.85559	0.7194	D6RHH0;U3KQT3;D6RDI2;J3KPP4;O95232	Luc7-like protein 3	LUC7L3
29.885	34708000	1.89123	3.21252	1.06808	O00571;A0A0D9SFB3;A0A2R8Y645;A0A2R8Y4A4;A0A2U3TZJ9;A0A2R8YFS5;A0A2R8YFR4;A0A0D9SG12;A0A2R8YCW1;A0A2R8YF78;A0A2R8Y5G6;A0A2R8Y7T2;A0A2R8YDT5;A0A0D9SF53;O15523;F6S8Q4;A0A2R8YDH3	ATP-dependent RNA helicase DDX3X;ATP-dependent RNA helicase DDX3Y	DDX3X;DDX3Y
323.31	61528000	1.89053	-3.44377	-1.11787	D6RFI1;D6R9W4;Q16643	Drebrin	DBN1
12.932	28392000	1.88753	2.25832	0.833424	A0A3B3IRI2;P17812;A0A3B3ITB8;B4E1E0;A0A3B3IRQ8;A0A3B3ITF6	CTP synthase 1;CTP synthase	CTPS1
6.2757	21586000	1.88541	2.50812	0.899291	C9JEV0;P25311	Zinc-alpha-2-glycoprotein	AZGP1
215.52	345670000	1.85558	0.944067	0.410232	J3KTN0;J3QLN6;J3QR64;J3KSZ0;J3KTB5;J3QL43;J3QS69;J3KT12;E7EQG2;P60842;Q14240	Eukaryotic initiation factor 4A-I;Eukaryotic initiation factor 4A-II;Eukaryotic initiation factor 4A-II, N-terminally processed	EIF4A1;EIF4A2
115.57	261980000	1.79643	4.06179	1.21807	Q9UQ35	Serine/arginine repetitive matrix protein 2	SRRM2
174.76	105610000	1.68224	4.24305	1.22007	P38432	Coilin	COIL
80.794	104640000	1.55079	3.10804	0.983002	A0A024RAC6;Q14241	Transcription elongation factor B polypeptide 3	TCEB3
123.57	312870000	1.54066	1.39213	0.551706	P09874	Poly [ADP-ribose] polymerase 1	PARP1
47.402	95499000	1.52709	2.87967	0.931704	Q9BZE4	Nucleolar GTP-binding protein 1	GTPBP4
46.767	25407000	1.51866	2.12063	0.755459	C9J9K3;A0A0C4DG17;P08865	40S ribosomal protein SA	RPSA
49.869	79899000	1.51438	2.98121	0.950234	Q96SB4;H3BLV9	SRSF protein kinase 1	SRPK1
13.016	9914600	1.45651	1.66236	0.625976	Q9UG63	ATP-binding cassette sub-family F member 2	ABCF2
323.31	180080000	1.4265	0.786855	0.339768	Q2NL82;I3L1Q5	Pre-rRNA-processing protein TSR1 homolog	TSR1
7.0701	26942000	1.39712	1.64884	0.61671	A0A1W2PNX8;Q9H3U1	Protein unc-45 homolog A	UNC45A
6.5519	20682000	1.36444	2.03936	0.715591	I3L1L3;Q9BQG0	Myb-binding protein 1A	MYBBP1A
43.038	30511000	1.36176	2.14908	0.741805	O60231;A0A140T947;Q5SQH5	Putative pre-mRNA-splicing factor ATP-dependent RNA helicase DHX16	DHX16
12.176	32080000	1.35237	0.805995	0.344677	P54136	Arginine--tRNA ligase, cytoplasmic	RARS
6.991	8663800	1.34522	1.48997	0.566879	Q96HR8	H/ACA ribonucleoprotein complex non-core subunit NAF1	NAF1
33.904	41779000	1.32938	1.99455	0.699957	P11387	DNA topoisomerase 1	TOP1
38.378	90219000	1.3271	2.05789	0.7151	Q32Q12;E7ERL0;J3KPD9;P22392;P15531	Nucleoside diphosphate kinase;Nucleoside diphosphate kinase B;Nucleoside diphosphate kinase A	NME1-NME2;NME1;NME2
323.31	768840000	1.29983	-1.58402	-0.589416	A0A2R8Y793;P63261;P60709;I3L4N8;I3L3I0;I3L1U9	Actin, cytoplasmic 2;Actin, cytoplasmic 2, N-terminally processed;Actin, cytoplasmic 1;Actin, cytoplasmic 1, N-terminally processed	ACTG1;ACTB
323.31	2078700000	1.29544	0.717724	0.310386	Q71U36;F8VQQ4	Tubulin alpha-1A chain	TUBA1A
16.728	38201000	1.29449	0.842846	0.356077	G3V5R3;G3V3A4;Q13573	SNW domain-containing protein 1	SNW1
12.795	21207000	1.27582	1.40793	0.537263	Q99459	Cell division cycle 5-like protein	CDC5L
15.761	50466000	1.24174	1.85797	0.654796	F8VRJ2;H0YHC3;F8W020;F8W118;F8VXI6;F8VUX1;F8VY35;F8VV59;B7Z9C2;F8W0J6;F5H4R6;H0YIV4;P55209	Nucleosome assembly protein 1-like 1	NAP1L1
12.334	13158000	1.2371	1.85182	0.652672	P62191	26S protease regulatory subunit 4	PSMC1
15.701	13060000	1.23569	1.56339	0.57742	H3BMC9;Q1ED39	Lysine-rich nucleolar protein 1	KNOP1
18.497	29892000	1.2305	2.11977	0.71549	K7EJM5;A0A087WX29;A0A0A0N0M3;K7EN94;B1AKP7;G3V162;A0A087X260;A0A087WYY0;Q13148;K7EJ99;A0A0A0MSV7;A0A087WXQ5;A0A087WV68;A0A1W2PNU8	TAR DNA-binding protein 43	TARDBP;TDP43
12.059	27796000	1.20826	2.11636	0.711216	Q9BQ39;A0A087WVC1	ATP-dependent RNA helicase DDX50	DDX50
26.57	119780000	1.20719	2.40904	0.774253	Q14498;G3V546;A0A0U1RQW2;G3V5Z6;H0YJJ3;A0A0U1RQH7;G3XAP0;H0Y4X3;G3XAC6;Q86U06	RNA-binding protein 39;Probable RNA-binding protein 23	RBM39;RBM23
33.87	142320000	1.18246	-1.22389	-0.475419	CON__Q7RTT2;CON__Q8N1N4-2;Q8N1N4	Keratin, type II cytoskeletal 78	KRT78
7.2098	16015000	1.15556	1.96342	0.668074	Q9Y2R4	Probable ATP-dependent RNA helicase DDX52	DDX52
323.31	4242300000	1.13445	-1.70373	-0.60264	CON__P35908v2;CON__P35908;P35908	Keratin, type II cytoskeletal 2 epidermal	KRT2
286.44	337940000	1.1246	1.04712	0.41685	A0A2R8YD40;A0A2U3TZM0;A0A2R8YDJ9;A0A2R8Y5J0;A0A2R8Y4X2;A0A2R8YFK9;A0A2R8Y425;A0A2R8YDW2;A0A2R8YFD8;F5GWX5;A0A2R8Y212;A0A2R8Y521;A0A0C4DGG9;Q14839;A0A2R8YER1;A0A2R8Y8C1;A0A2R8Y445;A0A2R8Y8B3;A0A2R8Y685;A0A2R8Y5Z7	Chromodomain-helicase-DNA-binding protein 4	CHD4
143.07	44203000	1.11705	-1.68463	-0.595652	P00558;P07205	Phosphoglycerate kinase 1;Phosphoglycerate kinase 2	PGK1;PGK2
206.09	325490000	1.10532	-0.431097	-0.194734	P14618;B4DNK4	Pyruvate kinase PKM;Pyruvate kinase	PKM
20.976	44220000	1.10488	2.16186	0.703648	Q5SY16	Polynucleotide 5-hydroxyl-kinase NOL9	NOL9
9.5826	73704000	1.07756	0.448617	0.201435	Q6PCB5	Round spermatid basic protein 1-like protein	RSBN1L
11.83	17845000	1.07173	1.80694	0.619077	P28066	Proteasome subunit alpha type-5	PSMA5
14.074	33214000	1.04693	2.28909	0.718434	P81605	Dermcidin;Survival-promoting peptide;DCD-1	DCD
73.287	59573000	1.03865	2.29946	0.718744	P35579	Myosin-9	MYH9
7.5329	7822500	1.03507	1.69217	0.586537	A0A087X295;Q9NNW5	WD repeat-containing protein 6	WDR6
31.957	65299000	1.02786	1.96274	0.647269	F8W7C6;A0A087WV22;X1WI28;P27635	60S ribosomal protein L10	RPL10
41.151	45302000	1.02126	2.6641	0.781595	H7BZ72;Q9Y2X3	Nucleolar protein 58	NOP58
16.79	60618000	1.00772	1.4247	0.515931	Q8NC51	Plasminogen activator inhibitor 1 RNA-binding protein	SERBP1
237.04	248130000	0.984622	-2.60805	-0.762557	CON__P13647;P13647	Keratin, type II cytoskeletal 5	KRT5
128.96	565810000	0.974343	-0.728042	-0.303376	E9PDR0;C9JQS9;P05166;E7ETT4;E7EUY3;E7ETT1;E7EX59;F8WBI9;E9PEC3;E7ENC1	Propionyl-CoA carboxylase beta chain, mitochondrial	PCCB
15.012	27113000	0.972186	-1.0867	-0.418311	Q08554	Desmocollin-1	DSC1
14.432	37384000	0.950642	1.89069	0.618072	M0R0P1;M0R299;M0QXL5;M0R2Q4;P22087	rRNA 2-O-methyltransferase fibrillarin	FBL
7.9047	18991000	0.950219	1.1403	0.432105	O15355	Protein phosphatase 1G	PPM1G
31.777	60156000	0.949477	1.10626	0.422195	P19338;H7BY16	Nucleolin	NCL
323.31	161920000	0.948586	-2.61534	-0.754253	CON__P12763
38.773	29044000	0.929856	-1.6811	-0.568232	P12814;H9KV75;P35609;G3V2W4;A0A494C1A0;G3V2N5	Alpha-actinin-1;Alpha-actinin-2	ACTN1;ACTN2
12.527	11760000	0.888601	1.39306	0.493353	K7ENG2;P26368	Splicing factor U2AF 65 kDa subunit	U2AF2
323.31	1573000000	0.881759	0.974275	0.377682	Q9BVA1;Q13885	Tubulin beta-2B chain;Tubulin beta-2A chain	TUBB2B;TUBB2A
35.026	59663000	0.868456	1.19506	0.439414	P51532;A0A2R8Y526;Q9HBD4;A0A2R8Y4P4;A0A2R8Y7S2;A0A2R8YGG3;A0A2R8YG32;A0A2R8Y440;A0A2R8Y7F3;A0A2R8Y6N0;A0A2R8YF80;A0A2R8Y7Y7;A0A2R8YF58;A0A2R8Y6V2;A0A2R8Y523;A0A2R8Y5K3;K7EQF0;A0A2R8YFK5;A0A0A0MT49;A0A2R8Y4C5;A0A2R8YDA1;A0A0U1RRG6;A0A0U1RQZ9;F6VDE0;P51531	Transcription activator BRG1;Probable global transcription activator SNF2L2	SMARCA4;SMARCA2
7.3538	10058000	0.862672	1.46732	0.508013	P07814	Bifunctional glutamate/proline--tRNA ligase;Glutamate--tRNA ligase;Proline--tRNA ligase	EPRS
14.222	9750200	0.858037	1.10331	0.413092	O43143	Pre-mRNA-splicing factor ATP-dependent RNA helicase DHX15	DHX15
8.7863	10169000	0.857862	1.10945	0.414796	J3QSA9;J3QQM1;P62195	26S protease regulatory subunit 8	PSMC5
323.31	23592000000	0.850965	-1.16397	-0.429124	CON__P04264;P04264	Keratin, type II cytoskeletal 1	KRT1
180.33	393820000	0.850629	0.74656	0.303839	A0A0G2JIW1;P0DMV9;P0DMV8;V9GZ37	Heat shock 70 kDa protein 1B;Heat shock 70 kDa protein 1A	HSPA1B;HSPA1A
19.84	56889000	0.845141	2.02419	0.623644	Q9NX58	Cell growth-regulating nucleolar protein	LYAR
14.23	14784000	0.839093	1.52081	0.517047	P50454;H0YEP8;E9PQ34;E9PJH8;E9PIG2;E9PRS3;E9PKH2;E9PNX1;E9PK86;E9PMI5;E9PR70;E9PPV6	Serpin H1	SERPINH1
323.31	297510000	0.825863	-1.80396	-0.57619	A0A2R8Y6G6;P06733	Alpha-enolase	ENO1
323.31	226760000	0.804218	1.46739	0.49919	P35232;C9JW96	Prohibitin	PHB
81.134	112550000	0.802073	2.7058	0.724217	P0C0S8;P04908;A0A0U1RR32;A0A0U1RRH7;Q99878;H0YFX9;Q16777;Q96KK5;Q9BTM1;Q93077;Q7L7L0;Q6FI13;P20671;Q71UI9;P0C0S5;C9J0D1;A0A494C189;Q96QV6;A0A3B3IS11;P16104;C9J386	Histone H2A type 1;Histone H2A type 1-B/E;Histone H2A type 1-J;Histone H2A;Histone H2A type 2-C;Histone H2A type 1-H;Histone H2A.J;Histone H2A type 1-C;Histone H2A type 3;Histone H2A type 2-A;Histone H2A type 1-D;Histone H2A.V;Histone H2A.Z;Histone H2A type 1-A;Histone H2AX	HIST1H2AG;HIST1H2AB;HIST1H2AJ;H2AFJ;HIST2H2AC;HIST1H2AH;HIST1H2AC;HIST3H2A;HIST2H2AA3;HIST1H2AD;H2AFV;H2AFZ;HIST1H2AA;H2AFX
50.002	40157000	0.783827	1.99767	0.604345	A0A087WVQ6;Q00610	Clathrin heavy chain;Clathrin heavy chain 1	CLTC
17.254	101630000	0.781466	-0.28762	-0.131428	A0A2R8Y8A0;E7ETK0;A0A2R8Y849;A0A2R8YD14;P62847	40S ribosomal protein S24	RPS24
15.515	42956000	0.776779	1.99438	0.602027	P12273	Prolactin-inducible protein	PIP
33.49	62723000	0.768594	2.04034	0.608257	P30041	Peroxiredoxin-6	PRDX6
23.466	24168000	0.762039	1.55056	0.510671	P62304	Small nuclear ribonucleoprotein E	SNRPE
13.179	10897000	0.740551	1.11438	0.403477	CON__Q3ZBS7;P04004	Vitronectin;Vitronectin V65 subunit;Vitronectin V10 subunit;Somatomedin-B	VTN
15.735	19233000	0.736234	1.28625	0.446062	P62701	40S ribosomal protein S4, X isoform	RPS4X
21.41	79223000	0.727793	2.01948	0.593959	P26641	Elongation factor 1-gamma	EEF1G
6.2542	4079600	0.722401	0.994747	0.369285	Q96CX2	BTB/POZ domain-containing protein KCTD12	KCTD12
44.443	34209000	0.698728	1.54114	0.49656	O75643;A0A494C1A5	U5 small nuclear ribonucleoprotein 200 kDa helicase	SNRNP200
33.087	61700000	0.697908	1.19081	0.417309	Q99714;Q5H928	3-hydroxyacyl-CoA dehydrogenase type-2	HSD17B10
323.31	4589300000	0.697702	-1.5288	-0.493787	P13645;CON__P13645	Keratin, type I cytoskeletal 10	KRT10
20.628	25227000	0.696296	1.75617	0.53852	P18085;F5H0C7;C9JPM4;C9J1Z8;C9JAK5;F5H423;P84085;P84077;P61204	ADP-ribosylation factor 4;ADP-ribosylation factor 5;ADP-ribosylation factor 1;ADP-ribosylation factor 3	ARF4;ARF3;ARF5;ARF1
104.78	95587000	0.696292	1.60616	0.509345	Q5T6W2;P61978	Heterogeneous nuclear ribonucleoprotein K	HNRNPK
12.247	8182800	0.687108	0.974906	0.360074	E7ER27;A0A2R8Y7L2;G5E9S2;E7ET17;A0A2R8YD50;E7EWE5;P51659;A0A2R8Y7W2;E7EPL9	Peroxisomal multifunctional enzyme type 2;(3R)-hydroxyacyl-CoA dehydrogenase;Enoyl-CoA hydratase 2	HSD17B4
66.449	43313000	0.685951	-1.38633	-0.460965	P14923	Junction plakoglobin	JUP
14.101	12940000	0.679604	1.18652	0.413616	Q15084	Protein disulfide-isomerase A6	PDIA6
20.399	97587000	0.669783	2.0746	0.586624	P62081;B5MCP9;A0A2R8Y623	40S ribosomal protein S7	RPS7
8.7249	9635100	0.665339	1.05338	0.378329	A0A0A0MR81;F5GXF5;E7ETD6;E9PE19;A0A2R8Y7Q1;Q12830	Nucleosome-remodeling factor subunit BPTF	BPTF
34.301	33161000	0.662606	1.60085	0.500917	P53396	ATP-citrate synthase	ACLY
8.1578	33760000	0.662433	1.59969	0.50065	E9PSF4;H0YEU2;E9PL09;P23396	40S ribosomal protein S3	RPS3
9.2405	11758000	0.630898	1.27623	0.426647	I3L3H2;P38919	Eukaryotic initiation factor 4A-III;Eukaryotic initiation factor 4A-III, N-terminally processed	EIF4A3
323.31	511460000	0.628595	0.409909	0.176737	Q9BVP2	Guanine nucleotide-binding protein-like 3	GNL3
323.31	295490000	0.614454	-0.562645	-0.229996	P10809	60 kDa heat shock protein, mitochondrial	HSPD1
39.124	34460000	0.612017	1.57768	0.484624	Q9H0A0;A0A087WV29	N-acetyltransferase 10	NAT10
9.0578	57956000	0.588929	0.903108	0.329476	H7C2W9;C9JU56;B7Z4E3;B7Z4C8;P62899	60S ribosomal protein L31	RPL31
49.234	209970000	0.588659	0.57421	0.232348	Q5RI18;A0A1W2PP35;A0A1W2PPS1;Q00839;A0A1W2PRI6;A0A1W2PRZ7;A0A1W2PQ74;A0A1W2PQL0;A0A1W2PP34;A0A1W2PPL4;A0A1W2PPH7;A0A1X7SBS1	Heterogeneous nuclear ribonucleoprotein U	HNRNPU
211.97	24711000	0.585527	-1.41508	-0.446887	P07900	Heat shock protein HSP 90-alpha	HSP90AA1
7.7532	68689000	0.564821	1.76755	0.505077	P06702	Protein S100-A9	S100A9
23.236	15235000	0.552597	1.28694	0.413664	G3V154;F2Z2T0;Q3YEC7;H0Y7H6	Rab-like protein 6	RABL6
231.8	393140000	0.541181	1.04881	0.359091	A0A087WUT6;O60841	Eukaryotic translation initiation factor 5B	EIF5B
323.31	119800000000	0.540799	-1.11503	-0.374243	CON__Streptavidin
6.94	27592000	0.529059	1.53314	0.454863	B4DT28;O43390	Heterogeneous nuclear ribonucleoprotein R	HNRNPR
39.788	414430000	0.517976	1.51541	0.448627	F5H018;B5MDF5;J3KQE5;P62826;H0YFC6;B4DV51	GTP-binding nuclear protein Ran	RAN
233.19	146010000	0.516844	0.410987	0.173095	P38646	Stress-70 protein, mitochondrial	HSPA9
323.31	419290000	0.515198	0.159016	0.0741261	P06748	Nucleophosmin	NPM1
323.31	203540000	0.511851	0.455672	0.188428	H0YLA2;P37108	Signal recognition particle 14 kDa protein	SRP14
128.16	247140000	0.511698	0.610361	0.238383	P49327;A0A0U1RQF0	Fatty acid synthase;[Acyl-carrier-protein] S-acetyltransferase;[Acyl-carrier-protein] S-malonyltransferase;3-oxoacyl-[acyl-carrier-protein] synthase;3-oxoacyl-[acyl-carrier-protein] reductase;3-hydroxyacyl-[acyl-carrier-protein] dehydratase;Enoyl-[acyl-carrier-protein] reductase;Oleoyl-[acyl-carrier-protein] hydrolase	FASN
42.097	75849000	0.507471	1.469	0.437487	P23246	Splicing factor, proline- and glutamine-rich	SFPQ
323.31	95088000	0.50045	1.46968	0.435626	D6RB09;D6RG13;D6RAT0;P61247;D6RGE0;D6RI02;D6RED7;D6RAS7;H0Y8L7;E9PFI5	40S ribosomal protein S3a	RPS3A
17.012	58687000	0.499762	0.810561	0.293844	P30050	60S ribosomal protein L12	RPL12
323.31	235230000	0.495814	0.760834	0.280079	P78371;F5GWF6;F8VQ14	T-complex protein 1 subunit beta	CCT2
22.197	40354000	0.479137	0.769425	0.280321	A6NIW5;P32119	Peroxiredoxin-2	PRDX2
323.31	2382700000	0.477777	-1.02307	-0.341867	P35527;CON__P35527;K7EQQ3	Keratin, type I cytoskeletal 9	KRT9
8.3627	10912000	0.475089	0.828202	0.295029	E5RHF4;E5RIZ4;Q9P015	39S ribosomal protein L15, mitochondrial	MRPL15
12.225	13317000	0.474238	-1.00379	-0.336872	O14776;G3V220	Transcription elongation regulator 1	TCERG1
13.42	319820000	0.470275	-1.50758	-0.433035	P31151;Q86SG5	Protein S100-A7;Protein S100-A7A	S100A7;S100A7A
48.411	38689000	0.458561	1.21857	0.378199	B4DUR8;P49368	T-complex protein 1 subunit gamma	CCT3
323.31	89471000	0.45782	-1.47559	-0.42381	P31943;G8JLB6;E9PCY7;D6RIU0;H0YB39;D6RBM0;E7EN40	Heterogeneous nuclear ribonucleoprotein H;Heterogeneous nuclear ribonucleoprotein H, N-terminally processed	HNRNPH1
135.56	1086200000	0.447197	0.311547	0.134355	CON__P02662
66.337	105780000	0.435578	1.38908	0.402381	Q5JP53;P07437;A0A0B4J269	Tubulin beta chain	TUBB;TUBB3
7.6438	8669800	0.418623	0.923857	0.30822	Q15029	116 kDa U5 small nuclear ribonucleoprotein component	EFTUD2
14.692	84235000	0.415989	1.11383	0.347132	J3KTA4;P17844	Probable ATP-dependent RNA helicase DDX5	DDX5
35.537	121130000	0.409612	0.380187	0.157247	A6NLN1;A0A0U1RRM4;P26599;K7ELW5;K7ES59;K7EKJ7;K7EK45	Polypyrimidine tract-binding protein 1	PTBP1
23.845	50698000	0.40851	0.876536	0.295599	O14617;A0A2R8Y4J3;A0A2R8Y611	AP-3 complex subunit delta-1	AP3D1
8.2474	15008000	0.406772	0.775826	0.27152	E9PNR9;E9PQ98;E9PIX6;H0YDE4;E9PKG1;Q99873	Protein arginine N-methyltransferase 1	PRMT1
323.31	466000000	0.399311	-1.76152	-0.443021	P68133;P68032;A6NL76;P63267;P62736	Actin, alpha skeletal muscle;Actin, alpha cardiac muscle 1;Actin, gamma-enteric smooth muscle;Actin, aortic smooth muscle	ACTA1;ACTC1;ACTG2;ACTA2
27.543	94074000	0.396308	1.14897	0.348498	A0A494C128;O00567;H0Y653;H0YDU4	Nucleolar protein 56	NOP56
305.48	625410000	0.387238	1.4161	0.390227	U3KQK0;Q99880;Q99879;Q99877;Q93079;Q8N257;Q5QNW6;Q16778;P62807;P58876;P57053;P33778;P23527;P06899;O60814	Histone H2B;Histone H2B type 1-L;Histone H2B type 1-M;Histone H2B type 1-N;Histone H2B type 1-H;Histone H2B type 3-B;Histone H2B type 2-F;Histone H2B type 2-E;Histone H2B type 1-C/E/F/G/I;Histone H2B type 1-D;Histone H2B type F-S;Histone H2B type 1-B;Histone H2B type 1-O;Histone H2B type 1-J;Histone H2B type 1-K	HIST1H2BN;HIST1H2BL;HIST1H2BM;HIST1H2BH;HIST3H2BB;HIST2H2BF;HIST2H2BE;HIST1H2BC;HIST1H2BD;H2BFS;HIST1H2BB;HIST1H2BO;HIST1H2BJ;HIST1H2BK
323.31	56442000	0.386421	0.81417	0.277103	P07737;K7EJ44;I3L3D5	Profilin-1	PFN1
26.378	47679000	0.369154	0.978123	0.308557	J3KT29;P62829;C9JD32;B9ZVP7	60S ribosomal protein L23	RPL23
7.45	353320000	0.362578	-0.634391	-0.229014	CON__Q5D862;Q5D862	Filaggrin-2	FLG2
27.148	48448000	0.359778	-1.1433	-0.336589	A0A0J9YXZ5;P46940;H0YLE8	Ras GTPase-activating-like protein IQGAP1	IQGAP1
9.5111	15413000	0.358335	0.73793	0.254066	F8WD96;C9JH19;H7C469;A0A1B0GW44;A0A1B0GVP3;A0A1B0GV23;A0A1B0GVD5;A0A1B0GWE8;A0A1B0GU92;A0A1B0GU03;P07339	Cathepsin D;Cathepsin D light chain;Cathepsin D heavy chain	CTSD
323.31	21646000000	0.329577	-0.451119	-0.174017	CON__P00761
7.0791	369370000	0.328552	0.358554	0.145044	H0YAW2		DENND3
29.1	76346000	0.322	-1.04852	-0.308062	B0YJC4;P08670;A0A1B0GTT5	Vimentin	VIM
6.1487	9881300	0.308616	0.626675	0.218432	Q8WVV4	Protein POF1B	POF1B
15.192	21613000	0.307834	-0.704445	-0.23648	P60201;B1B1G1;B1B1G2;B1B1G3;B1B1G4;B1B1G6	Myelin proteolipid protein	PLP1
12.173	25399000	0.297653	0.79673	0.253853	A0A087WVV1;P49721	Proteasome subunit beta type-2	PSMB2
6.5373	8965500	0.29753	0.716603	0.236941	Q8IYD1	Eukaryotic peptide chain release factor GTP-binding subunit ERF3B	GSPT2
323.31	384090000	0.295942	-0.665013	-0.225054	O75367;B4DJC3	Core histone macro-H2A.1;Histone H2A	H2AFY
6.4405	23725000	0.288376	0.604749	0.209448	G3XAL0;P40926	Malate dehydrogenase;Malate dehydrogenase, mitochondrial	MDH2
323.31	58339000000	0.281193	0.259174	0.108514	Q13085	Acetyl-CoA carboxylase 1;Biotin carboxylase	ACACA
49.272	79851000	0.270623	-0.80108	-0.247267	A0A3B3IS06;E7ETY2;Q13428;A0A2R8Y4M7;A0A2R8Y857;H0Y8Y7	Treacle protein	TCOF1
54.476	65494000	0.26571	-0.73565	-0.233083	P15924	Desmoplakin	DSP
25.653	56410000	0.261572	0.792487	0.24294	P34897;G3V4W5;G3V540;G3V5L0;G3V2Y4;H0YIZ0	Serine hydroxymethyltransferase, mitochondrial;Serine hydroxymethyltransferase	SHMT2
323.31	3020500000	0.259955	-0.209836	-0.08983	P05165;A0A1B0GU58;A0A1B0GWI4;A0A1B0GWA1;A0A1B0GUX9	Propionyl-CoA carboxylase alpha chain, mitochondrial	PCCA
323.31	516400000	0.257207	0.273566	0.11203	Q8NE71;H0YGW7;A0A0G2JIC2	ATP-binding cassette sub-family F member 1	ABCF1
8.7537	6903600	0.256676	0.489239	0.17525	H7C3T4;A6NJJ0;Q13162	Peroxiredoxin-4	PRDX4
31.754	183700000	0.252513	-0.205574	-0.0879543	CON__P02754
14.623	20528000	0.245178	0.807816	0.240502	F8WEI3;F8WDT8;G3V0G3;Q9NY93	Probable ATP-dependent RNA helicase DDX56	DDX56
323.31	440700000	0.245071	0.209452	0.0890351	O00763	Acetyl-CoA carboxylase 2;Biotin carboxylase	ACACB
20.689	224700000	0.239447	0.481038	0.170243	P62805	Histone H4	HIST1H4A
13.008	8023800	0.238205	0.468687	0.166914	F8VPD4;P27708	CAD protein;Glutamine-dependent carbamoyl-phosphate synthase;Aspartate carbamoyltransferase;Dihydroorotase	CAD
323.31	351810000	0.237784	-0.919548	-0.256315	P02538;CON__P02538;P48668;CON__P04259;CON__P48668;O95678;CON__O95678	Keratin, type II cytoskeletal 6A;Keratin, type II cytoskeletal 6C;Keratin, type II cytoskeletal 75	KRT6A;KRT6C;KRT75
6.7206	14775000	0.226338	0.507266	0.174115	A0A2U3TZH3;Q05639;A0A2R8Y660;A0A2R8Y488	Elongation factor 1-alpha 2	EEF1A2
6.6022	7176400	0.222136	0.261721	0.105581	D6RF62;E9PBS1;P22234	Multifunctional protein ADE2;Phosphoribosylaminoimidazole-succinocarboxamide synthase;Phosphoribosylaminoimidazole carboxylase	PAICS
20.887	37063000	0.220073	-0.564643	-0.185652	A0A5F9ZH78;A0A5F9ZGN6;P05089	Arginase-1	ARG1
323.31	1928200000	0.218616	-0.286066	-0.113042	P04406;E7EUT5	Glyceraldehyde-3-phosphate dehydrogenase	GAPDH
32.079	9594100	0.217335	0.43203	0.153998	Q07021;I3L3Q7;I3L3B0	Complement component 1 Q subcomponent-binding protein, mitochondrial	C1QBP
6.2372	4966000	0.207019	0.328636	0.124539	A9JX13;Q9UGU0	Transcription factor 20	TCF20
6.6641	6964300	0.196065	0.440098	0.151938	E9PGB1;E7ESU7;D6RAX2;E7EPF8;Q13363	C-terminal-binding protein 1	CTBP1
24.902	54658000	0.195729	-0.747405	-0.212037	P15311;E7EQR4	Ezrin	EZR
13.708	42325000	0.190486	0.513812	0.167188	P62244;I3L3P7;I3L246;H3BN98	40S ribosomal protein S15a	RPS15A
323.31	1303300000	0.186888	0.727957	0.205293	P03612
76.042	54236000	0.182268	0.618472	0.185041	P06576;H0YH81;F8W0P7	ATP synthase subunit beta, mitochondrial;ATP synthase subunit beta	ATP5B
153.62	139020000	0.175254	-0.214259	-0.0863519	A0A087WUI2;P22626	Heterogeneous nuclear ribonucleoproteins A2/B1	HNRNPA2B1
93.895	68571000	0.173576	0.823048	0.212993	Q00266;P31153	S-adenosylmethionine synthase isoform type-1;S-adenosylmethionine synthase isoform type-2	MAT1A;MAT2A
7.2369	21235000	0.155803	0.441771	0.142495	A0A024R4E5;Q00341	Vigilin	HDLBP
115.08	92644000	0.151124	-0.673576	-0.180904	P08238	Heat shock protein HSP 90-beta	HSP90AB1
323.31	46298000000	0.141492	-0.143163	-0.0599424	P11498	Pyruvate carboxylase, mitochondrial	PC
20.203	99235000	0.140413	0.596512	0.164367	P31944	Caspase-14;Caspase-14 subunit p17, mature form;Caspase-14 subunit p10, mature form;Caspase-14 subunit p20, intermediate form;Caspase-14 subunit p8, intermediate form	CASP14
65.072	236540000	0.136143	0.179376	0.071648	G5E9G0;P39023;H7C3M2;B5MCW2;H7C422	60S ribosomal protein L3	RPL3
20.217	25968000	0.133641	-0.39004	-0.125283	P61221;D6R9I9	ATP-binding cassette sub-family E member 1	ABCE1
61.029	128460000	0.133531	0.580955	0.158756	I3L397;I3L504;P63241;F8WCJ1;C9J7B5;C9J4W5;Q9GZV4;Q6IS14	Eukaryotic translation initiation factor 5A;Eukaryotic translation initiation factor 5A-1;Eukaryotic translation initiation factor 5A-2;Eukaryotic translation initiation factor 5A-1-like	EIF5A;EIF5A2;EIF5AL1
68.546	25712000	0.127866	-0.385199	-0.122525	Q99832	T-complex protein 1 subunit eta	CCT7
6.4009	9138900	0.122927	0.141736	0.0581829	Q13347	Eukaryotic translation initiation factor 3 subunit I	EIF3I
39.144	60250000	0.121427	0.336548	0.110456	H0YEN5;P15880;I3L404;E9PM36;E9PQD7	40S ribosomal protein S2	RPS2
19.227	22793000	0.118055	-0.315864	-0.105014	P50990	T-complex protein 1 subunit theta	CCT8
94.419	49903000	0.116727	-0.347575	-0.111388	P12277;G3V4N7	Creatine kinase B-type	CKB
64.799	90909000	0.113206	-0.523261	-0.140131	H0YA55;D6RHD5;B7WNR0;A0A0C4DGB6;CON__P02768-1;P02768;C9JKR2	Serum albumin	ALB
49.889	60485000	0.112709	-0.531094	-0.140983	K7EMA7;H7BY10;K7ERT8;A8MUS3;P62750;K7EJV9	60S ribosomal protein L23a	RPL23A
323.31	149080000	0.112441	0.508355	0.137577	A2A3R7;A2A3R5;P62753	40S ribosomal protein S6	RPS6
18.452	14351000	0.110581	-0.289487	-0.0971438	Q5JR95;P62241	40S ribosomal protein S8	RPS8
6.6414	24114000	0.110137	-0.25582	-0.0891616	Q9NS69	Mitochondrial import receptor subunit TOM22 homolog	TOMM22
229.11	215120000	0.094652	0.429361	0.11683	Q5VTE0;P68104;A0A087WVQ9;A0A087WV01	Putative elongation factor 1-alpha-like 3;Elongation factor 1-alpha 1;Elongation factor 1-alpha	EEF1A1P5;EEF1A1
17.829	52102000	0.0936935	-0.274623	-0.0891213	Q01780	Exosome component 10	EXOSC10
21.427	136070000	0.0893731	0.421245	0.112861	J3KSP2;J3KT73;J3QL01;P63173	60S ribosomal protein L38	RPL38
7.7019	6497000	0.0890556	0.177344	0.0649198	H0YCG0;A0A0G2JMS7;A0A0G2JNZ2;A0A0G2JPP5;A0A669KB89;Q14160	Protein scribble homolog	SCRIB
323.31	45849000	0.0831411	0.305083	0.0913082	P12268;H0Y4R1;E7ETK5	Inosine-5-monophosphate dehydrogenase 2	IMPDH2
6.8005	47770000	0.0777238	0.388234	0.101717	Q58FF8	Putative heat shock protein HSP 90-beta 2	HSP90AB2P
12.762	19078000	0.0711169	-0.144128	-0.052743	P07355;A6NMY6;H0YN28;H0YL33;H0YM50;H0YN42	Annexin A2;Putative annexin A2-like protein;Annexin	ANXA2;ANXA2P2
28.742	37645000	0.0655105	0.240599	0.0724531	P12956;B1AHC9	X-ray repair cross-complementing protein 6	XRCC6
6.8507	806970000	0.0626466	-0.40683	-0.0939774	Q8IWV8	E3 ubiquitin-protein ligase UBR2	UBR2
50.663	126600000	0.0626332	-0.122721	-0.045407	F8VZ49;F8W6I7;Q32P51;P09651;F8VTQ5;F8W646	Heterogeneous nuclear ribonucleoprotein A1-like 2;Heterogeneous nuclear ribonucleoprotein A1;Heterogeneous nuclear ribonucleoprotein A1, N-terminally processed	HNRNPA1;HNRNPA1L2
114.27	27192000	0.0500787	0.168498	0.0527863	A0A087WYC1;P34932;A0A087WTS8	Heat shock 70 kDa protein 4	HSPA4
73.249	41617000	0.0464268	-0.210289	-0.0584306	P18583;J3QSZ5;H7C1M2	Protein SON	SON
19.373	3668900	0.0417427	0.0866137	0.0317378	P62140;E9PMD7;F8VYE8;F8W0W8;P36873;P62136	Serine/threonine-protein phosphatase PP1-beta catalytic subunit;Serine/threonine-protein phosphatase;Serine/threonine-protein phosphatase PP1-gamma catalytic subunit;Serine/threonine-protein phosphatase PP1-alpha catalytic subunit	PPP1CB;PPP1CA;PPP1CC
323.31	6594700000	0.0362783	0.0509445	0.0204543	Q96RQ3;E9PHF7;G5E9X5;F5GYT8;E9PG35	Methylcrotonoyl-CoA carboxylase subunit alpha, mitochondrial	MCCC1
7.596	8045700	0.0352804	-0.073717	-0.0270094	Q5JRG1;H7BYF2;Q9BVL2	Nucleoporin p58/p45	NUPL1
9.7557	19066000	0.0350128	-0.124769	-0.0384678	K7ENW7;P26358	DNA (cytosine-5)-methyltransferase 1	DNMT1
20.775	31573000	0.0303236	0.12383	0.0362284	H7C452;Q9NVP1	ATP-dependent RNA helicase DDX18	DDX18
323.31	493940000	0.0300027	0.0641273	0.0233874	J3KPS3;P04075;H3BR68;H3BQN4;H3BU78	Fructose-bisphosphate aldolase;Fructose-bisphosphate aldolase A	ALDOA
33.37	98666000	0.0292026	-0.0904287	-0.029417	A0A3B3IRL2;O75629	Protein CREG1	CREG1
34.488	116550000	0.0211871	-0.0301226	-0.0121026	P13639	Elongation factor 2	EEF2
20.259	93843000	0.0182634	-0.0375683	-0.0138876	Q7L7X3	Serine/threonine-protein kinase TAO1	TAOK1
55.076	73283000	0.0130369	0.0226728	0.00874456	Q8IY81	pre-rRNA processing protein FTSJ3	FTSJ3
323.31	109370000	0.00996193	0.0503348	0.013544	A0A087X0X3;P52272	Heterogeneous nuclear ribonucleoprotein M	HNRNPM
274.8	43144000	0.00974066	0.0342094	0.0107148	P11021	78 kDa glucose-regulated protein	HSPA5
11.647	15589000	0.00766614	0.0159349	0.00589248	E9PL19;E9PMU7;E9PN18;A0A0J9YVR6;E9PQ56;A0A0J9YWM1;H0YEM1;A0A0J9YYL3;A0A0J9YXJ8;A0A0J9YVP6;A0A0J9YXX5;Q9UHX1	Poly(U)-binding-splicing factor PUF60	PUF60
323.31	251300000	0.00161279	-0.01173	-0.00263747	P02533;CON__P02533;CON__Q6IFX2	Keratin, type I cytoskeletal 14	KRT14

## Sheet: Table S6 
Protein Ids	Majority protein IDs	Fasta headers	Razor + unique peptides	Unique peptides	Razor + unique peptides L1H1	Razor + unique peptides L2H2	Razor + unique peptides L3H3	Sequence coverage [%]	Score	Ratio H/L	Ratio H/L normalized	Ratio H/L variability [%]	Ratio H/L L1H1	Ratio H/L L2H2	Ratio H/L L3H3	Ratio H/L normalized L1H1	Ratio H/L normalized L2H2	Ratio H/L normalized L3H3	Intensity	Intensity L	Intensity H	Intensity L1H1	Intensity L L1H1	Intensity H L1H1	Intensity L2H2	Intensity L L2H2	Intensity H L2H2	Intensity L3H3	Intensity L L3H3	Intensity H L3H3
sp|P50897-2|PPT1_HUMAN;sp|P50897|PPT1_HUMAN	sp|P50897-2|PPT1_HUMAN;sp|P50897|PPT1_HUMAN	sp|P50897-2|PPT1_HUMAN Isoform 2 of Palmitoyl-protein thioesterase 1 OS=Homo sapiens OX=9606 GN=PPT1;sp|P50897|PPT1_HUMAN Palmitoyl-protein thioesterase 1 OS=Homo sapiens OX=9606 GN=PPT1 PE=1 SV=1	2	2	1	1	1	9.4	4.3832	0.29282	0.27835	101.37	NaN	NaN	NaN	NaN	NaN	NaN	65682000	41947000	23735000	37237000	31493000	5744000	9102800	0	9102800	19342000	10454000	8888300
sp|Q9Y6H1|CHCH2_HUMAN;sp|Q5T1J5|CHCH9_HUMAN	sp|Q9Y6H1|CHCH2_HUMAN;sp|Q5T1J5|CHCH9_HUMAN	sp|Q9Y6H1|CHCH2_HUMAN Coiled-coil-helix-coiled-coil-helix domain-containing protein 2 OS=Homo sapiens OX=9606 GN=CHCHD2 PE=1 SV=1;sp|Q5T1J5|CHCH9_HUMAN Putative coiled-coil-helix-coiled-coil-helix domain-containing protein CHCHD2P9, mitochondrial OS=Homo s	2	2	0	2	1	18.5	4.5742	0.35043	0.38726	19.76	NaN	0.34959	NaN	NaN	0.38475	NaN	37789000	27204000	10585000	0	0	0	25778000	18119000	7658900	12011000	9084600	2926100
sp|Q93050-1|VPP1_HUMAN;sp|Q93050|VPP1_HUMAN;sp|Q93050-3|VPP1_HUMAN	sp|Q93050-1|VPP1_HUMAN;sp|Q93050|VPP1_HUMAN;sp|Q93050-3|VPP1_HUMAN	sp|Q93050-1|VPP1_HUMAN Isoform 2 of V-type proton ATPase 116 kDa subunit a 1 OS=Homo sapiens OX=9606 GN=ATP6V0A1;sp|Q93050|VPP1_HUMAN V-type proton ATPase 116 kDa subunit a 1 OS=Homo sapiens OX=9606 GN=ATP6V0A1 PE=1 SV=3;sp|Q93050-3|VPP1_HUMAN Isoform 3 of	1	1	1	1	1	2.2	8.6802	0.4018	0.39229	6.556	NaN	NaN	NaN	NaN	NaN	NaN	52312000	45931000	6381200	21074000	17149000	3925500	18436000	18436000	0	12801000	10346000	2455600
sp|Q53EL6-2|PDCD4_HUMAN;sp|Q53EL6|PDCD4_HUMAN	sp|Q53EL6-2|PDCD4_HUMAN;sp|Q53EL6|PDCD4_HUMAN	sp|Q53EL6-2|PDCD4_HUMAN Isoform 2 of Programmed cell death protein 4 OS=Homo sapiens OX=9606 GN=PDCD4;sp|Q53EL6|PDCD4_HUMAN Programmed cell death protein 4 OS=Homo sapiens OX=9606 GN=PDCD4 PE=1 SV=2	4	4	3	3	3	14.4	12.94	0.44884	0.40727	51.443	0.49079	0.38614	0.39231	0.43387	0.40572	0.3771	89312000	69819000	19493000	27744000	18428000	9316000	21446000	17369000	4076900	40122000	34022000	6100500
sp|Q96T23|RSF1_HUMAN;sp|Q96T23-2|RSF1_HUMAN;sp|Q96T23-3|RSF1_HUMAN	sp|Q96T23|RSF1_HUMAN;sp|Q96T23-2|RSF1_HUMAN	sp|Q96T23|RSF1_HUMAN Remodeling and spacing factor 1 OS=Homo sapiens OX=9606 GN=RSF1 PE=1 SV=2;sp|Q96T23-2|RSF1_HUMAN Isoform 2 of Remodeling and spacing factor 1 OS=Homo sapiens OX=9606 GN=RSF1	4	4	3	1	2	3.5	5.8167	0.40569	0.43353	68.786	0.43244	NaN	NaN	0.47756	NaN	NaN	25160000	12569000	12591000	17176000	8894900	8281000	1455600	0	1455600	6528300	3674100	2854200
sp|P82663|RT25_HUMAN;sp|P82663-3|RT25_HUMAN;sp|P82663-2|RT25_HUMAN	sp|P82663|RT25_HUMAN;sp|P82663-3|RT25_HUMAN;sp|P82663-2|RT25_HUMAN	sp|P82663|RT25_HUMAN 28S ribosomal protein S25, mitochondrial OS=Homo sapiens OX=9606 GN=MRPS25 PE=1 SV=1;sp|P82663-3|RT25_HUMAN Isoform 3 of 28S ribosomal protein S25, mitochondrial OS=Homo sapiens OX=9606 GN=MRPS25;sp|P82663-2|RT25_HUMAN Isoform 2 of 28S	2	2	2	1	0	18.5	4.4239	0.39189	0.43393	34.25	0.39189	NaN	NaN	0.43393	NaN	NaN	27392000	21274000	6117900	23640000	17522000	6117900	3751600	3751600	0	0	0	0
sp|Q12906|ILF3_HUMAN;sp|Q12906-5|ILF3_HUMAN;sp|Q12906-2|ILF3_HUMAN;sp|Q12906-3|ILF3_HUMAN;sp|Q96SI9-2|STRBP_HUMAN;sp|Q96SI9|STRBP_HUMAN	sp|Q12906|ILF3_HUMAN;sp|Q12906-5|ILF3_HUMAN;sp|Q12906-2|ILF3_HUMAN;sp|Q12906-3|ILF3_HUMAN	sp|Q12906|ILF3_HUMAN Interleukin enhancer-binding factor 3 OS=Homo sapiens OX=9606 GN=ILF3 PE=1 SV=3;sp|Q12906-5|ILF3_HUMAN Isoform 5 of Interleukin enhancer-binding factor 3 OS=Homo sapiens OX=9606 GN=ILF3;sp|Q12906-2|ILF3_HUMAN Isoform 2 of Interleukin e	1	1	1	1	1	44.1	7.0273	0.43881	0.44353	21.206	NaN	0.49194	0.41935	NaN	0.53353	0.39116	53100000	38888000	14212000	6741500	6741500	0	19824000	13136000	6687600	26535000	19010000	7524300
sp|Q12906-7|ILF3_HUMAN;sp|Q12906-4|ILF3_HUMAN;sp|Q12906-6|ILF3_HUMAN	sp|Q12906-7|ILF3_HUMAN;sp|Q12906-4|ILF3_HUMAN;sp|Q12906-6|ILF3_HUMAN	sp|Q12906-7|ILF3_HUMAN Isoform 7 of Interleukin enhancer-binding factor 3 OS=Homo sapiens OX=9606 GN=ILF3;sp|Q12906-4|ILF3_HUMAN Isoform 4 of Interleukin enhancer-binding factor 3 OS=Homo sapiens OX=9606 GN=ILF3;sp|Q12906-6|ILF3_HUMAN Isoform 6 of Interleu	28	1	21	27	24	43.4	227.66	0.48864	0.45612	1.9854	NaN	NaN	NaN	NaN	NaN	NaN	104910000	90213000	14701000	34066000	27438000	6627300	34979000	34979000	0	35869000	27795000	8074100
sp|Q99627-2|CSN8_HUMAN;sp|Q99627|CSN8_HUMAN	sp|Q99627-2|CSN8_HUMAN;sp|Q99627|CSN8_HUMAN	sp|Q99627-2|CSN8_HUMAN Isoform 2 of COP9 signalosome complex subunit 8 OS=Homo sapiens OX=9606 GN=COPS8;sp|Q99627|CSN8_HUMAN COP9 signalosome complex subunit 8 OS=Homo sapiens OX=9606 GN=COPS8 PE=1 SV=1	3	3	2	1	3	28.8	8.6622	0.44428	0.45709	40.177	0.6714	0.43537	0.429	0.64358	0.46824	0.42021	108390000	65412000	42973000	35715000	24458000	11256000	25956000	17930000	8026300	46714000	23024000	23691000
sp|Q9H857-4|NT5D2_HUMAN;sp|Q9H857|NT5D2_HUMAN;sp|Q9H857-3|NT5D2_HUMAN;sp|Q9H857-2|NT5D2_HUMAN	sp|Q9H857-4|NT5D2_HUMAN;sp|Q9H857|NT5D2_HUMAN;sp|Q9H857-3|NT5D2_HUMAN;sp|Q9H857-2|NT5D2_HUMAN	sp|Q9H857-4|NT5D2_HUMAN Isoform 4 of 5-nucleotidase domain-containing protein 2 OS=Homo sapiens OX=9606 GN=NT5DC2;sp|Q9H857|NT5D2_HUMAN 5-nucleotidase domain-containing protein 2 OS=Homo sapiens OX=9606 GN=NT5DC2 PE=1 SV=1;sp|Q9H857-3|NT5D2_HUMAN Isoform	1	1	1	1	1	3.8	3.1332	0.42973	0.46452	20.198	0.4068	0.59217	NaN	0.46357	0.64472	NaN	21579000	13003000	8576200	8487600	5444000	3043700	8885600	4813900	4071700	4205800	2744900	1460900
sp|Q16134-3|ETFD_HUMAN;sp|Q16134|ETFD_HUMAN	sp|Q16134-3|ETFD_HUMAN;sp|Q16134|ETFD_HUMAN	sp|Q16134-3|ETFD_HUMAN Isoform 2 of Electron transfer flavoprotein-ubiquinone oxidoreductase, mitochondrial OS=Homo sapiens OX=9606 GN=ETFDH;sp|Q16134|ETFD_HUMAN Electron transfer flavoprotein-ubiquinone oxidoreductase, mitochondrial OS=Homo sapiens OX=960	1	1	1	0	1	3.3	5.1443	0.48586	0.47505	2.626	NaN	NaN	NaN	NaN	NaN	NaN	13192000	8613000	4579500	6374900	3951600	2423400	0	0	0	6817500	4661500	2156100
sp|Q8WVX9|FACR1_HUMAN	sp|Q8WVX9|FACR1_HUMAN	sp|Q8WVX9|FACR1_HUMAN Fatty acyl-CoA reductase 1 OS=Homo sapiens OX=9606 GN=FAR1 PE=1 SV=1	4	4	2	4	4	11.1	9.3893	0.46102	0.47819	21.998	NaN	0.46263	0.47552	NaN	0.49585	0.44563	103180000	89909000	13275000	21683000	21683000	0	46318000	38764000	7553600	35183000	29462000	5721100
sp|P61978-2|HNRPK_HUMAN;sp|P61978|HNRPK_HUMAN	sp|P61978-2|HNRPK_HUMAN;sp|P61978|HNRPK_HUMAN	sp|P61978-2|HNRPK_HUMAN Isoform 2 of Heterogeneous nuclear ribonucleoprotein K OS=Homo sapiens OX=9606 GN=HNRNPK;sp|P61978|HNRPK_HUMAN Heterogeneous nuclear ribonucleoprotein K OS=Homo sapiens OX=9606 GN=HNRNPK PE=1 SV=1	18	1	17	17	18	49.6	323.31	0.50295	0.48628	33.088	NaN	NaN	NaN	NaN	NaN	NaN	967590000	887530000	80064000	370030000	354200000	15823000	301060000	236820000	64240000	296500000	296500000	0
sp|Q15366|PCBP2_HUMAN;sp|Q15366-2|PCBP2_HUMAN;sp|Q15366-5|PCBP2_HUMAN;sp|Q15366-8|PCBP2_HUMAN;sp|P57721-2|PCBP3_HUMAN;sp|P57721-3|PCBP3_HUMAN;sp|P57723-2|PCBP4_HUMAN;sp|P57723|PCBP4_HUMAN	sp|Q15366|PCBP2_HUMAN;sp|Q15366-2|PCBP2_HUMAN;sp|Q15366-5|PCBP2_HUMAN;sp|Q15366-8|PCBP2_HUMAN	sp|Q15366|PCBP2_HUMAN Poly(rC)-binding protein 2 OS=Homo sapiens OX=9606 GN=PCBP2 PE=1 SV=1;sp|Q15366-2|PCBP2_HUMAN Isoform 2 of Poly(rC)-binding protein 2 OS=Homo sapiens OX=9606 GN=PCBP2;sp|Q15366-5|PCBP2_HUMAN Isoform 5 of Poly(rC)-binding protein 2 OS=	16	1	10	14	12	57.5	229.11	0.51043	0.49028	9.9612	0.50617	0.52588	0.50984	0.4506	0.53929	0.47626	134830000	83058000	51767000	45456000	27781000	17675000	46493000	28648000	17845000	42876000	26630000	16247000
sp|Q96C90|PP14B_HUMAN;sp|P53671-3|LIMK2_HUMAN	sp|Q96C90|PP14B_HUMAN;sp|P53671-3|LIMK2_HUMAN	sp|Q96C90|PP14B_HUMAN Protein phosphatase 1 regulatory subunit 14B OS=Homo sapiens OX=9606 GN=PPP1R14B PE=1 SV=3;sp|P53671-3|LIMK2_HUMAN Isoform 3 of LIM domain kinase 2 OS=Homo sapiens OX=9606 GN=LIMK2	4	4	3	4	3	30.6	23.39	0.52158	0.49786	12.172	0.56603	0.44258	0.52158	0.57274	0.47147	0.49786	523650000	341120000	182530000	188130000	125370000	62767000	170130000	108850000	61276000	165390000	106900000	58489000
sp|Q92520|FAM3C_HUMAN	sp|Q92520|FAM3C_HUMAN	sp|Q92520|FAM3C_HUMAN Protein FAM3C OS=Homo sapiens OX=9606 GN=FAM3C PE=1 SV=1	2	2	2	1	1	14.5	5.9178	0.48681	0.49859	11.134	NaN	0.43954	NaN	NaN	0.47867	NaN	43372000	24145000	19227000	11540000	8317100	3222600	26443000	15828000	10616000	5388900	0	5388900
sp|O43795|MYO1B_HUMAN;sp|O43795-2|MYO1B_HUMAN;sp|Q9UBC5|MYO1A_HUMAN	sp|O43795|MYO1B_HUMAN;sp|O43795-2|MYO1B_HUMAN;sp|Q9UBC5|MYO1A_HUMAN	sp|O43795|MYO1B_HUMAN Unconventional myosin-Ib OS=Homo sapiens OX=9606 GN=MYO1B PE=1 SV=3;sp|O43795-2|MYO1B_HUMAN Isoform 2 of Unconventional myosin-Ib OS=Homo sapiens OX=9606 GN=MYO1B;sp|Q9UBC5|MYO1A_HUMAN Unconventional myosin-Ia OS=Homo sapiens OX=9606	2	2	1	1	1	3.1	3.297	0.50095	0.50334	36.284	NaN	NaN	NaN	NaN	NaN	NaN	18295000	10846000	7448600	6535700	4578500	1957200	5689000	2950200	2738800	6070200	3317700	2752600
sp|Q13617|CUL2_HUMAN;sp|Q13617-2|CUL2_HUMAN	sp|Q13617|CUL2_HUMAN;sp|Q13617-2|CUL2_HUMAN	sp|Q13617|CUL2_HUMAN Cullin-2 OS=Homo sapiens OX=9606 GN=CUL2 PE=1 SV=2;sp|Q13617-2|CUL2_HUMAN Isoform 2 of Cullin-2 OS=Homo sapiens OX=9606 GN=CUL2	7	7	4	3	2	15	9.3671	0.58675	0.51513	100.31	0.76386	NaN	NaN	0.69325	NaN	NaN	45132000	19374000	25758000	27582000	13078000	14505000	7718300	3323600	4394700	9831700	2972900	6858800
sp|P34949-2|MPI_HUMAN;sp|P34949|MPI_HUMAN	sp|P34949-2|MPI_HUMAN;sp|P34949|MPI_HUMAN	sp|P34949-2|MPI_HUMAN Isoform 2 of Mannose-6-phosphate isomerase OS=Homo sapiens OX=9606 GN=MPI;sp|P34949|MPI_HUMAN Mannose-6-phosphate isomerase OS=Homo sapiens OX=9606 GN=MPI PE=1 SV=2	4	4	3	3	4	18.8	11.963	0.53963	0.52226	10.228	0.58538	0.48119	0.52726	0.53487	0.50826	0.50424	240510000	152630000	87882000	66939000	39096000	27842000	87155000	62827000	24327000	86419000	50706000	35713000
sp|Q9C005|DPY30_HUMAN	sp|Q9C005|DPY30_HUMAN	sp|Q9C005|DPY30_HUMAN Protein dpy-30 homolog OS=Homo sapiens OX=9606 GN=DPY30 PE=1 SV=1	1	1	1	1	1	16.2	6.5095	0.51744	0.52897	16.294	0.38879	0.52372	0.55371	0.3929	0.56296	0.54581	92139000	62735000	29403000	22513000	16083000	6429600	38697000	25918000	12778000	30930000	20734000	10195000
sp|P27361|MK03_HUMAN;sp|P27361-3|MK03_HUMAN;sp|P27361-2|MK03_HUMAN	sp|P27361|MK03_HUMAN;sp|P27361-3|MK03_HUMAN;sp|P27361-2|MK03_HUMAN	sp|P27361|MK03_HUMAN Mitogen-activated protein kinase 3 OS=Homo sapiens OX=9606 GN=MAPK3 PE=1 SV=4;sp|P27361-3|MK03_HUMAN Isoform 3 of Mitogen-activated protein kinase 3 OS=Homo sapiens OX=9606 GN=MAPK3;sp|P27361-2|MK03_HUMAN Isoform 2 of Mitogen-activated	2	2	2	0	1	17.2	4.2496	0.55368	0.5295	24.549	0.53206	NaN	NaN	0.51753	NaN	NaN	23240000	17459000	5780900	19658000	15673000	3984800	0	0	0	3581700	1785500	1796100
REV__sp|Q14BN4-8|SLMAP_HUMAN;REV__sp|Q14BN4-5|SLMAP_HUMAN;REV__sp|Q14BN4-4|SLMAP_HUMAN;REV__sp|Q14BN4-2|SLMAP_HUMAN;REV__sp|Q14BN4-3|SLMAP_HUMAN;REV__sp|Q14BN4|SLMAP_HUMAN	REV__sp|Q14BN4-8|SLMAP_HUMAN;REV__sp|Q14BN4-5|SLMAP_HUMAN;REV__sp|Q14BN4-4|SLMAP_HUMAN;REV__sp|Q14BN4-2|SLMAP_HUMAN;REV__sp|Q14BN4-3|SLMAP_HUMAN;REV__sp|Q14BN4|SLMAP_HUMAN	sp|Q14BN4-8|SLMAP_HUMAN Isoform 8 of Sarcolemmal membrane-associated protein OS=Homo sapiens OX=9606 GN=SLMAP;sp|Q14BN4-5|SLMAP_HUMAN Isoform 5 of Sarcolemmal membrane-associated protein OS=Homo sapiens OX=9606 GN=SLMAP;sp|Q14BN4-4|SLMAP_HUMAN Isoform 4 of	1	1	0	0	1	0	3.699	0.61733	0.53406	0	NaN	NaN	0.61733	NaN	NaN	0.53406	75053000	34910000	40143000	0	0	0	0	0	0	75053000	34910000	40143000
sp|Q8NDC0|MISSL_HUMAN	sp|Q8NDC0|MISSL_HUMAN	sp|Q8NDC0|MISSL_HUMAN MAPK-interacting and spindle-stabilizing protein-like OS=Homo sapiens OX=9606 GN=MAPK1IP1L PE=1 SV=4	1	1	1	1	1	6.9	28.273	0.57013	0.54859	5.1775	0.59418	0.55048	0.60583	0.54827	0.58138	0.51335	316010000	191680000	124320000	100910000	59983000	40925000	109350000	67458000	41889000	105750000	64243000	41508000
sp|P52758|RIDA_HUMAN	sp|P52758|RIDA_HUMAN	sp|P52758|RIDA_HUMAN 2-iminobutanoate/2-iminopropanoate deaminase OS=Homo sapiens OX=9606 GN=RIDA PE=1 SV=1	2	2	1	1	1	21.9	4.5703	0.56307	0.55088	12.547	NaN	NaN	NaN	NaN	NaN	NaN	30150000	20723000	9427100	11869000	8981900	2887200	7254600	7254600	0	11027000	4486900	6539800
sp|Q6RW13-2|ATRAP_HUMAN;sp|Q6RW13|ATRAP_HUMAN	sp|Q6RW13-2|ATRAP_HUMAN;sp|Q6RW13|ATRAP_HUMAN	sp|Q6RW13-2|ATRAP_HUMAN Isoform 2 of Type-1 angiotensin II receptor-associated protein OS=Homo sapiens OX=9606 GN=AGTRAP;sp|Q6RW13|ATRAP_HUMAN Type-1 angiotensin II receptor-associated protein OS=Homo sapiens OX=9606 GN=AGTRAP PE=1 SV=1	1	1	1	1	1	14.5	4.5284	0.57833	0.55895	6.2924	0.58116	0.55686	0.54513	0.55895	0.60096	0.5269	69734000	42774000	26961000	29004000	17835000	11169000	19514000	12897000	6616900	21216000	12042000	9174400
sp|Q9NYL9|TMOD3_HUMAN	sp|Q9NYL9|TMOD3_HUMAN	sp|Q9NYL9|TMOD3_HUMAN Tropomodulin-3 OS=Homo sapiens OX=9606 GN=TMOD3 PE=1 SV=1	3	3	3	3	3	16.2	7.0497	0.52614	0.56054	14.582	0.54213	0.52733	0.52851	0.4993	0.58911	0.52569	128990000	75827000	53165000	38571000	24966000	13606000	41155000	20996000	20159000	49266000	29865000	19400000
sp|P0DMV8|HS71A_HUMAN;sp|P0DMV9|HS71B_HUMAN;sp|P0DMV8-2|HS71A_HUMAN	sp|P0DMV8|HS71A_HUMAN;sp|P0DMV9|HS71B_HUMAN;sp|P0DMV8-2|HS71A_HUMAN	sp|P0DMV8|HS71A_HUMAN Heat shock 70 kDa protein 1A OS=Homo sapiens OX=9606 GN=HSPA1A PE=1 SV=1;sp|P0DMV9|HS71B_HUMAN Heat shock 70 kDa protein 1B OS=Homo sapiens OX=9606 GN=HSPA1B PE=1 SV=1;sp|P0DMV8-2|HS71A_HUMAN Isoform 2 of Heat shock 70 kDa protein 1A	33	20	29	33	30	61.3	323.31	0.595	0.56069	53.447	0.63498	0.53439	0.66987	0.58605	0.54785	0.6173	63910000000	38977000000	24933000000	20444000000	11945000000	8499100000	23785000000	15489000000	8296400000	19682000000	11544000000	8137600000
sp|Q9UPN6|SCAF8_HUMAN;sp|Q9UPN6-2|SCAF8_HUMAN;sp|O95104-2|SCAF4_HUMAN;sp|O95104-3|SCAF4_HUMAN;sp|O95104|SCAF4_HUMAN	sp|Q9UPN6|SCAF8_HUMAN;sp|Q9UPN6-2|SCAF8_HUMAN;sp|O95104-2|SCAF4_HUMAN;sp|O95104-3|SCAF4_HUMAN;sp|O95104|SCAF4_HUMAN	sp|Q9UPN6|SCAF8_HUMAN SR-related and CTD-associated factor 8 OS=Homo sapiens OX=9606 GN=SCAF8 PE=1 SV=1;sp|Q9UPN6-2|SCAF8_HUMAN Isoform 2 of SR-related and CTD-associated factor 8 OS=Homo sapiens OX=9606 GN=SCAF8;sp|O95104-2|SCAF4_HUMAN Isoform 2 of SR-rel	2	2	2	1	1	2	3.7419	0.54006	0.56528	5.459	NaN	0.55769	0.55797	NaN	0.60035	0.55835	45343000	27618000	17724000	8149400	4392300	3757200	22380000	14240000	8139700	14813000	8985800	5827600
sp|O15116|LSM1_HUMAN	sp|O15116|LSM1_HUMAN	sp|O15116|LSM1_HUMAN U6 snRNA-associated Sm-like protein LSm1 OS=Homo sapiens OX=9606 GN=LSM1 PE=1 SV=1	2	2	2	1	2	26.3	4.4331	0.56861	0.56816	4.8775	NaN	0.60862	0.55704	NaN	0.662	0.53499	73083000	39427000	33656000	16710000	4801300	11909000	26408000	14788000	11620000	29965000	19838000	10127000
sp|P53990-2|IST1_HUMAN;sp|P53990|IST1_HUMAN;sp|P53990-4|IST1_HUMAN;sp|P53990-5|IST1_HUMAN;sp|P53990-6|IST1_HUMAN;sp|P53990-3|IST1_HUMAN	sp|P53990-2|IST1_HUMAN;sp|P53990|IST1_HUMAN;sp|P53990-4|IST1_HUMAN;sp|P53990-5|IST1_HUMAN;sp|P53990-6|IST1_HUMAN;sp|P53990-3|IST1_HUMAN	sp|P53990-2|IST1_HUMAN Isoform 2 of IST1 homolog OS=Homo sapiens OX=9606 GN=IST1;sp|P53990|IST1_HUMAN IST1 homolog OS=Homo sapiens OX=9606 GN=IST1 PE=1 SV=1;sp|P53990-4|IST1_HUMAN Isoform 4 of IST1 homolog OS=Homo sapiens OX=9606 GN=IST1;sp|P53990-5|IST1_H	3	3	1	2	1	14.9	12.156	0.54502	0.5713	14.036	NaN	0.54502	NaN	NaN	0.5713	NaN	20712000	16907000	3805800	0	0	0	17783000	13977000	3805800	2929500	2929500	0
sp|O00264|PGRC1_HUMAN;sp|O00264-2|PGRC1_HUMAN	sp|O00264|PGRC1_HUMAN	sp|O00264|PGRC1_HUMAN Membrane-associated progesterone receptor component 1 OS=Homo sapiens OX=9606 GN=PGRMC1 PE=1 SV=3	7	6	5	7	6	49.7	47.038	0.62659	0.5722	22.704	0.6922	0.58029	0.69177	0.60767	0.61108	0.6223	1854800000	1073500000	781340000	607130000	358040000	249090000	625250000	362690000	262560000	622470000	352780000	269690000
sp|Q9UBI6|GBG12_HUMAN	sp|Q9UBI6|GBG12_HUMAN	sp|Q9UBI6|GBG12_HUMAN Guanine nucleotide-binding protein G(I)/G(S)/G(O) subunit gamma-12 OS=Homo sapiens OX=9606 GN=GNG12 PE=1 SV=3	1	1	1	1	1	22.2	5.6442	0.62621	0.5783	8.2272	0.62893	0.65013	0.61894	0.57359	0.67512	0.57167	102830000	61926000	40900000	23935000	14229000	9705500	37906000	23013000	14893000	40984000	24683000	16302000
sp|P84157-2|MXRA7_HUMAN;sp|P84157-3|MXRA7_HUMAN;sp|P84157|MXRA7_HUMAN	sp|P84157-2|MXRA7_HUMAN;sp|P84157-3|MXRA7_HUMAN;sp|P84157|MXRA7_HUMAN	sp|P84157-2|MXRA7_HUMAN Isoform 2 of Matrix-remodeling-associated protein 7 OS=Homo sapiens OX=9606 GN=MXRA7;sp|P84157-3|MXRA7_HUMAN Isoform 3 of Matrix-remodeling-associated protein 7 OS=Homo sapiens OX=9606 GN=MXRA7;sp|P84157|MXRA7_HUMAN Matrix-remodelin	1	1	1	0	0	10.6	4.7348	0.61799	0.57847	14.467	0.61799	NaN	NaN	0.57847	NaN	NaN	21661000	12189000	9472200	21661000	12189000	9472200	0	0	0	0	0	0
sp|Q69YN2|C19L1_HUMAN;sp|Q69YN2-3|C19L1_HUMAN;sp|Q69YN2-2|C19L1_HUMAN	sp|Q69YN2|C19L1_HUMAN;sp|Q69YN2-3|C19L1_HUMAN;sp|Q69YN2-2|C19L1_HUMAN	sp|Q69YN2|C19L1_HUMAN CWF19-like protein 1 OS=Homo sapiens OX=9606 GN=CWF19L1 PE=1 SV=2;sp|Q69YN2-3|C19L1_HUMAN Isoform 3 of CWF19-like protein 1 OS=Homo sapiens OX=9606 GN=CWF19L1;sp|Q69YN2-2|C19L1_HUMAN Isoform 2 of CWF19-like protein 1 OS=Homo sapiens O	4	4	1	4	3	13.8	13.725	0.59249	0.57851	78.162	0.58491	1.0447	0.41076	0.54891	1.0954	0.39418	125620000	74477000	51145000	30582000	21839000	8742600	70944000	37644000	33300000	24097000	14994000	9103200
sp|Q9NX14|NDUBB_HUMAN;sp|Q9NX14-2|NDUBB_HUMAN	sp|Q9NX14|NDUBB_HUMAN;sp|Q9NX14-2|NDUBB_HUMAN	sp|Q9NX14|NDUBB_HUMAN NADH dehydrogenase [ubiquinone] 1 beta subcomplex subunit 11, mitochondrial OS=Homo sapiens OX=9606 GN=NDUFB11 PE=1 SV=1;sp|Q9NX14-2|NDUBB_HUMAN Isoform 2 of NADH dehydrogenase [ubiquinone] 1 beta subcomplex subunit 11, mitochondrial	1	1	1	0	1	15	4.4733	0.57458	0.57907	1.8287	0.57458	NaN	NaN	0.57907	NaN	NaN	34252000	22638000	11614000	27444000	15830000	11614000	0	0	0	6808000	6808000	0
sp|Q00796|DHSO_HUMAN;sp|Q00796-2|DHSO_HUMAN	sp|Q00796|DHSO_HUMAN	sp|Q00796|DHSO_HUMAN Sorbitol dehydrogenase OS=Homo sapiens OX=9606 GN=SORD PE=1 SV=4	4	4	4	2	2	20.4	14.382	0.60058	0.5802	11.413	0.57106	0.48742	0.55288	0.54081	0.52488	0.52142	213690000	136140000	77554000	93622000	59990000	33632000	51672000	31152000	20519000	68396000	44993000	23403000
sp|Q9H1A7|RPB1C_HUMAN;sp|Q9GZM3|RPB1B_HUMAN;sp|Q9GZM3-2|RPB1B_HUMAN;sp|P52435|RPB11_HUMAN	sp|Q9H1A7|RPB1C_HUMAN;sp|Q9GZM3|RPB1B_HUMAN;sp|Q9GZM3-2|RPB1B_HUMAN;sp|P52435|RPB11_HUMAN	sp|Q9H1A7|RPB1C_HUMAN DNA-directed RNA polymerase II subunit RPB11-b2 OS=Homo sapiens OX=9606 GN=POLR2J3 PE=1 SV=1;sp|Q9GZM3|RPB1B_HUMAN DNA-directed RNA polymerase II subunit RPB11-b1 OS=Homo sapiens OX=9606 GN=POLR2J2 PE=1 SV=2;sp|Q9GZM3-2|RPB1B_HUMAN Is	1	1	1	1	0	14.8	7.467	0.55438	0.58116	13.241	0.54969	NaN	NaN	0.5777	NaN	NaN	32273000	20766000	11508000	20853000	12696000	8157400	11420000	8069800	3350100	0	0	0
sp|P16402|H13_HUMAN	sp|P16402|H13_HUMAN	sp|P16402|H13_HUMAN Histone H1.3 OS=Homo sapiens OX=9606 GN=H1-3 PE=1 SV=2	1	1	1	1	1	22.6	6.3151	0.6185	0.58171	10.302	0.71737	0.49542	0.6185	0.655	0.51763	0.58171	235580000	142730000	92852000	74706000	42382000	32324000	80849000	49742000	31107000	80029000	50608000	29421000
sp|Q92616|GCN1_HUMAN	sp|Q92616|GCN1_HUMAN	sp|Q92616|GCN1_HUMAN eIF-2-alpha kinase activator GCN1 OS=Homo sapiens OX=9606 GN=GCN1 PE=1 SV=7	21	21	14	18	14	11.3	53.437	0.60175	0.58225	29.113	0.51897	0.6142	0.52731	0.56091	0.67844	0.52778	625410000	416470000	208940000	180610000	123660000	56950000	247520000	164830000	82687000	197270000	127970000	69302000
sp|P84022-2|SMAD3_HUMAN;sp|P84022|SMAD3_HUMAN;sp|O15198-2|SMAD9_HUMAN;sp|Q15796-2|SMAD2_HUMAN;sp|Q15796|SMAD2_HUMAN;sp|O15198|SMAD9_HUMAN;sp|P84022-3|SMAD3_HUMAN;sp|Q99717|SMAD5_HUMAN;sp|Q15797|SMAD1_HUMAN	sp|P84022-2|SMAD3_HUMAN;sp|P84022|SMAD3_HUMAN;sp|O15198-2|SMAD9_HUMAN;sp|Q15796-2|SMAD2_HUMAN;sp|Q15796|SMAD2_HUMAN;sp|O15198|SMAD9_HUMAN;sp|P84022-3|SMAD3_HUMAN;sp|Q99717|SMAD5_HUMAN;sp|Q15797|SMAD1_HUMAN	sp|P84022-2|SMAD3_HUMAN Isoform 2 of Mothers against decapentaplegic homolog 3 OS=Homo sapiens OX=9606 GN=SMAD3;sp|P84022|SMAD3_HUMAN Mothers against decapentaplegic homolog 3 OS=Homo sapiens OX=9606 GN=SMAD3 PE=1 SV=1;sp|O15198-2|SMAD9_HUMAN Isoform B of	2	2	1	1	1	5.8	2.8555	0.57452	0.58353	2.2206	NaN	NaN	NaN	NaN	NaN	NaN	13442000	8646600	4795000	0	0	0	6841400	4283200	2558200	6600200	4363400	2236800
sp|Q8IVS2|FABD_HUMAN	sp|Q8IVS2|FABD_HUMAN	sp|Q8IVS2|FABD_HUMAN Malonyl-CoA-acyl carrier protein transacylase, mitochondrial OS=Homo sapiens OX=9606 GN=MCAT PE=1 SV=2	1	1	1	1	1	5.9	2.3252	0.56497	0.58461	17.732	0.52812	0.63853	NaN	0.51993	0.67351	NaN	50799000	31723000	19076000	14038000	8902600	5135200	22713000	12237000	10476000	14048000	10583000	3465200
sp|P62837-2|UB2D2_HUMAN;sp|P62837|UB2D2_HUMAN;sp|P61077|UB2D3_HUMAN;sp|P61077-2|UB2D3_HUMAN;sp|P61077-3|UB2D3_HUMAN	sp|P62837-2|UB2D2_HUMAN;sp|P62837|UB2D2_HUMAN;sp|P61077|UB2D3_HUMAN;sp|P61077-2|UB2D3_HUMAN;sp|P61077-3|UB2D3_HUMAN	sp|P62837-2|UB2D2_HUMAN Isoform 2 of Ubiquitin-conjugating enzyme E2 D2 OS=Homo sapiens OX=9606 GN=UBE2D2;sp|P62837|UB2D2_HUMAN Ubiquitin-conjugating enzyme E2 D2 OS=Homo sapiens OX=9606 GN=UBE2D2 PE=1 SV=1;sp|P61077|UB2D3_HUMAN Ubiquitin-conjugating enzym	3	3	2	3	3	32.2	4.9165	0.56746	0.58867	75.051	0.45339	0.56526	0.59159	0.52716	0.61778	0.58867	254580000	94137000	160450000	76829000	16207000	60622000	85740000	45625000	40114000	92016000	32304000	59711000
sp|O60884|DNJA2_HUMAN	sp|O60884|DNJA2_HUMAN	sp|O60884|DNJA2_HUMAN DnaJ homolog subfamily A member 2 OS=Homo sapiens OX=9606 GN=DNAJA2 PE=1 SV=1	6	6	5	6	5	29.4	24.679	0.58832	0.58887	40.384	0.67651	0.58766	0.70063	0.62109	0.61915	0.64612	794350000	518740000	275600000	247160000	170630000	76523000	268240000	170130000	98105000	278960000	177980000	100970000
sp|P07910|HNRPC_HUMAN;sp|P07910-3|HNRPC_HUMAN;sp|P0DMR1|HNRC4_HUMAN;sp|O60812|HNRC1_HUMAN;sp|B7ZW38|HNRC3_HUMAN;sp|B2RXH8|HNRC2_HUMAN	sp|P07910|HNRPC_HUMAN;sp|P07910-3|HNRPC_HUMAN	sp|P07910|HNRPC_HUMAN Heterogeneous nuclear ribonucleoproteins C1/C2 OS=Homo sapiens OX=9606 GN=HNRNPC PE=1 SV=4;sp|P07910-3|HNRPC_HUMAN Isoform 3 of Heterogeneous nuclear ribonucleoproteins C1/C2 OS=Homo sapiens OX=9606 GN=HNRNPC	2	2	1	2	1	37.9	10.422	0.57833	0.59577	3.3478	0.59835	0.5981	0.59246	0.57558	0.64719	0.58267	139570000	82991000	56582000	44605000	27224000	17381000	63075000	35983000	27092000	31893000	19784000	12109000
sp|Q7Z4H3|HDDC2_HUMAN;sp|Q7Z4H3-2|HDDC2_HUMAN	sp|Q7Z4H3|HDDC2_HUMAN;sp|Q7Z4H3-2|HDDC2_HUMAN	sp|Q7Z4H3|HDDC2_HUMAN 5-deoxynucleotidase HDDC2 OS=Homo sapiens OX=9606 GN=HDDC2 PE=1 SV=1;sp|Q7Z4H3-2|HDDC2_HUMAN Isoform 2 of 5-deoxynucleotidase HDDC2 OS=Homo sapiens OX=9606 GN=HDDC2	2	2	2	2	2	19.6	14.666	0.64231	0.60002	16.418	0.59693	0.70094	0.63435	0.55209	0.74489	0.60002	264070000	157280000	106790000	90530000	55533000	34997000	88201000	50905000	37296000	85337000	50837000	34500000
sp|Q3ZCM7|TBB8_HUMAN	sp|Q3ZCM7|TBB8_HUMAN	sp|Q3ZCM7|TBB8_HUMAN Tubulin beta-8 chain OS=Homo sapiens OX=9606 GN=TUBB8 PE=1 SV=2	1	1	1	1	1	21.2	81.686	0.64525	0.6006	17.815	0.56126	0.73942	0.64731	0.50767	0.76644	0.60306	6545700000	3848300000	2697400000	2611000000	1610600000	1000400000	1990800000	1105800000	885070000	1943900000	1132000000	811870000
sp|Q13907|IDI1_HUMAN;sp|Q13907-2|IDI1_HUMAN	sp|Q13907|IDI1_HUMAN;sp|Q13907-2|IDI1_HUMAN	sp|Q13907|IDI1_HUMAN Isopentenyl-diphosphate Delta-isomerase 1 OS=Homo sapiens OX=9606 GN=IDI1 PE=1 SV=2;sp|Q13907-2|IDI1_HUMAN Isoform 2 of Isopentenyl-diphosphate Delta-isomerase 1 OS=Homo sapiens OX=9606 GN=IDI1	5	5	3	5	3	26.9	27.709	0.66494	0.6079	38.436	0.6182	0.68513	0.66494	0.56159	0.73931	0.6079	235440000	145080000	90354000	71646000	45342000	26303000	89794000	56169000	33625000	73998000	43573000	30425000
sp|O60231|DHX16_HUMAN	sp|O60231|DHX16_HUMAN	sp|O60231|DHX16_HUMAN Pre-mRNA-splicing factor ATP-dependent RNA helicase DHX16 OS=Homo sapiens OX=9606 GN=DHX16 PE=1 SV=2	3	3	2	1	2	5.3	8.965	0.60161	0.61104	40.688	0.5749	NaN	NaN	0.5777	NaN	NaN	28920000	21064000	7855700	14095000	8046800	6048100	3281500	3281500	0	11543000	9735800	1807600
sp|P16083|NQO2_HUMAN	sp|P16083|NQO2_HUMAN	sp|P16083|NQO2_HUMAN Ribosyldihydronicotinamide dehydrogenase [quinone] OS=Homo sapiens OX=9606 GN=NQO2 PE=1 SV=5	2	2	0	1	1	13	4.3625	0.58884	0.61357	16.682	NaN	NaN	NaN	NaN	NaN	NaN	13290000	8717000	4573100	0	0	0	1794400	888080	906320	11496000	7828900	3666800
sp|Q96P70|IPO9_HUMAN	sp|Q96P70|IPO9_HUMAN	sp|Q96P70|IPO9_HUMAN Importin-9 OS=Homo sapiens OX=9606 GN=IPO9 PE=1 SV=3	7	7	5	6	5	11.9	26.53	0.65865	0.61652	44.03	0.52083	0.91401	0.74002	0.56855	1.0121	0.70153	257000000	140890000	116100000	83970000	50206000	33765000	86446000	41338000	45109000	86581000	49350000	37231000
sp|P62861|RS30_HUMAN	sp|P62861|RS30_HUMAN	sp|P62861|RS30_HUMAN FAU ubiquitin-like and ribosomal protein S30 OS=Homo sapiens OX=9606 GN=FAU PE=1 SV=2	2	2	2	2	2	8.3	7.9574	0.62466	0.61955	41.585	0.94905	0.69587	0.86224	0.9009	0.72703	0.8186	903680000	212540000	691150000	281600000	37039000	244560000	373920000	155530000	218390000	248160000	19969000	228200000
sp|P51970|NDUA8_HUMAN	sp|P51970|NDUA8_HUMAN	sp|P51970|NDUA8_HUMAN NADH dehydrogenase [ubiquinone] 1 alpha subcomplex subunit 8 OS=Homo sapiens OX=9606 GN=NDUFA8 PE=1 SV=3	3	3	3	3	3	27.3	11.152	0.66209	0.62668	33.033	0.68099	0.70024	0.64371	0.62733	0.73161	0.62603	706470000	413230000	293240000	209960000	124170000	85792000	269780000	157560000	112220000	226730000	131500000	95229000
sp|Q16718-2|NDUA5_HUMAN;sp|Q16718|NDUA5_HUMAN	sp|Q16718-2|NDUA5_HUMAN;sp|Q16718|NDUA5_HUMAN	sp|Q16718-2|NDUA5_HUMAN Isoform 2 of NADH dehydrogenase [ubiquinone] 1 alpha subcomplex subunit 5 OS=Homo sapiens OX=9606 GN=NDUFA5;sp|Q16718|NDUA5_HUMAN NADH dehydrogenase [ubiquinone] 1 alpha subcomplex subunit 5 OS=Homo sapiens OX=9606 GN=NDUFA5 PE=1 SV	2	2	1	2	1	35.3	6.8447	0.66666	0.62751	29.522	0.61425	0.86436	NaN	0.55458	0.94017	NaN	117070000	49414000	67656000	50763000	30489000	20274000	38085000	11044000	27042000	28221000	7881000	20340000
sp|P49753-2|ACOT2_HUMAN;sp|Q86TX2|ACOT1_HUMAN;sp|P49753|ACOT2_HUMAN	sp|P49753-2|ACOT2_HUMAN;sp|Q86TX2|ACOT1_HUMAN;sp|P49753|ACOT2_HUMAN	sp|P49753-2|ACOT2_HUMAN Isoform 2 of Acyl-coenzyme A thioesterase 2, mitochondrial OS=Homo sapiens OX=9606 GN=ACOT2;sp|Q86TX2|ACOT1_HUMAN Acyl-coenzyme A thioesterase 1 OS=Homo sapiens OX=9606 GN=ACOT1 PE=1 SV=1;sp|P49753|ACOT2_HUMAN Acyl-coenzyme A thioes	1	1	1	1	1	6.6	7.5664	0.61991	0.62812	13.229	NaN	NaN	0.59581	NaN	NaN	0.59991	36167000	23779000	12388000	14362000	11213000	3149200	3054700	0	3054700	18751000	12567000	6184200
sp|P00374|DYR_HUMAN;sp|P00374-2|DYR_HUMAN;sp|Q86XF0|DYR2_HUMAN	sp|P00374|DYR_HUMAN;sp|P00374-2|DYR_HUMAN;sp|Q86XF0|DYR2_HUMAN	sp|P00374|DYR_HUMAN Dihydrofolate reductase OS=Homo sapiens OX=9606 GN=DHFR PE=1 SV=2;sp|P00374-2|DYR_HUMAN Isoform 2 of Dihydrofolate reductase OS=Homo sapiens OX=9606 GN=DHFR;sp|Q86XF0|DYR2_HUMAN Dihydrofolate reductase 2, mitochondrial OS=Homo sapiens O	4	4	3	3	3	27.3	10.573	0.67935	0.63023	35.165	0.62531	0.78939	0.6615	0.57667	0.84243	0.61359	188770000	125450000	63325000	68475000	44135000	24339000	65314000	45702000	19612000	54984000	35611000	19373000
sp|P10412|H14_HUMAN	sp|P10412|H14_HUMAN	sp|P10412|H14_HUMAN Histone H1.4 OS=Homo sapiens OX=9606 GN=H1-4 PE=1 SV=2	5	1	5	5	5	22.8	32.329	0.62475	0.631	48.855	NaN	0.48626	0.96505	NaN	0.63039	0.92832	1343400000	763820000	579550000	6475700	2596000	3879700	957590000	580840000	376750000	379300000	180390000	198920000
sp|Q15773|MLF2_HUMAN	sp|Q15773|MLF2_HUMAN	sp|Q15773|MLF2_HUMAN Myeloid leukemia factor 2 OS=Homo sapiens OX=9606 GN=MLF2 PE=1 SV=1	1	1	1	1	1	7.3	5.0057	0.64012	0.63118	9.7702	0.59369	0.6702	0.64012	0.5686	0.71353	0.63118	64287000	38598000	25689000	21860000	13174000	8686000	22675000	13206000	9469000	19753000	12219000	7534200
sp|O15127|SCAM2_HUMAN	sp|O15127|SCAM2_HUMAN	sp|O15127|SCAM2_HUMAN Secretory carrier-associated membrane protein 2 OS=Homo sapiens OX=9606 GN=SCAMP2 PE=1 SV=2	2	2	2	2	2	10.3	13.616	0.65862	0.63228	44.745	0.6585	0.82664	0.49541	0.61904	0.88445	0.49304	146940000	69214000	77726000	43362000	20960000	22402000	66617000	32295000	34321000	36962000	15959000	21003000
sp|O95782-2|AP2A1_HUMAN;sp|O95782|AP2A1_HUMAN	sp|O95782-2|AP2A1_HUMAN;sp|O95782|AP2A1_HUMAN	sp|O95782-2|AP2A1_HUMAN Isoform B of AP-2 complex subunit alpha-1 OS=Homo sapiens OX=9606 GN=AP2A1;sp|O95782|AP2A1_HUMAN AP-2 complex subunit alpha-1 OS=Homo sapiens OX=9606 GN=AP2A1 PE=1 SV=3	3	3	0	3	0	14.2	2.4608	0.5729	0.63469	14.919	NaN	0.5729	NaN	NaN	0.63469	NaN	20390000	13862000	6528000	0	0	0	20390000	13862000	6528000	0	0	0
sp|P36954|RPB9_HUMAN	sp|P36954|RPB9_HUMAN	sp|P36954|RPB9_HUMAN DNA-directed RNA polymerase II subunit RPB9 OS=Homo sapiens OX=9606 GN=POLR2I PE=1 SV=1	1	1	1	0	1	18.4	6.273	0.75562	0.636	8.4848	0.66062	NaN	NaN	0.62895	NaN	NaN	30609000	17986000	12623000	19506000	11486000	8019800	0	0	0	11103000	6499800	4603100
sp|Q13423|NNTM_HUMAN	sp|Q13423|NNTM_HUMAN	sp|Q13423|NNTM_HUMAN NAD(P) transhydrogenase, mitochondrial OS=Homo sapiens OX=9606 GN=NNT PE=1 SV=3	4	4	3	2	4	6.2	6.3078	0.65119	0.63635	18.571	0.63758	NaN	0.63737	0.58282	NaN	0.64176	86140000	55325000	30815000	29089000	18795000	10294000	11702000	8507500	3194400	45349000	28022000	17327000
sp|P10109|ADX_HUMAN	sp|P10109|ADX_HUMAN	sp|P10109|ADX_HUMAN Adrenodoxin, mitochondrial OS=Homo sapiens OX=9606 GN=FDX1 PE=1 SV=1	1	1	1	1	1	11.4	6.1252	0.64084	0.63663	10.82	0.6096	NaN	0.71927	0.58802	NaN	0.71428	48976000	27806000	21169000	20670000	13059000	7611500	14871000	6341200	8529900	13434000	8406300	5028000
sp|O95671-3|ASML_HUMAN;sp|O95671-2|ASML_HUMAN;sp|O95671|ASML_HUMAN	sp|O95671-3|ASML_HUMAN;sp|O95671-2|ASML_HUMAN;sp|O95671|ASML_HUMAN	sp|O95671-3|ASML_HUMAN Isoform 3 of Probable bifunctional dTTP/UTP pyrophosphatase/methyltransferase protein OS=Homo sapiens OX=9606 GN=ASMTL;sp|O95671-2|ASML_HUMAN Isoform 2 of Probable bifunctional dTTP/UTP pyrophosphatase/methyltransferase protein OS=Ho	1	1	1	1	1	2.8	5.6612	0.56367	0.64214	9.1393	0.55254	0.62155	0.56141	0.65988	0.67808	0.58539	28375000	17772000	10603000	6664600	4431500	2233100	14057000	8409900	5647500	7653400	4930900	2722500
sp|Q9P2N5|RBM27_HUMAN	sp|Q9P2N5|RBM27_HUMAN	sp|Q9P2N5|RBM27_HUMAN RNA-binding protein 27 OS=Homo sapiens OX=9606 GN=RBM27 PE=1 SV=2	4	4	2	1	2	6	5.655	0.60901	0.6424	21.3	0.72133	0.6931	NaN	0.71052	0.75647	NaN	83595000	45055000	38540000	61575000	34264000	27311000	17326000	9229300	8096300	4694400	1561900	3132500
sp|Q96T37-4|RBM15_HUMAN;sp|Q96T37-2|RBM15_HUMAN;sp|Q96T37-3|RBM15_HUMAN;sp|Q96T37|RBM15_HUMAN	sp|Q96T37-4|RBM15_HUMAN;sp|Q96T37-2|RBM15_HUMAN;sp|Q96T37-3|RBM15_HUMAN;sp|Q96T37|RBM15_HUMAN	sp|Q96T37-4|RBM15_HUMAN Isoform 4 of RNA-binding protein 15 OS=Homo sapiens OX=9606 GN=RBM15;sp|Q96T37-2|RBM15_HUMAN Isoform 2 of RNA-binding protein 15 OS=Homo sapiens OX=9606 GN=RBM15;sp|Q96T37-3|RBM15_HUMAN Isoform 3 of RNA-binding protein 15 OS=Homo sa	2	2	1	2	1	5	5.1854	0.64138	0.64284	17.675	0.74193	0.67769	NaN	0.68315	0.73635	NaN	62893000	36502000	26391000	28308000	17346000	10962000	22272000	12576000	9696300	12313000	6579800	5732900
sp|P68402|PA1B2_HUMAN;sp|P68402-3|PA1B2_HUMAN;sp|P68402-2|PA1B2_HUMAN;sp|P68402-4|PA1B2_HUMAN	sp|P68402|PA1B2_HUMAN	sp|P68402|PA1B2_HUMAN Platelet-activating factor acetylhydrolase IB subunit alpha2 OS=Homo sapiens OX=9606 GN=PAFAH1B2 PE=1 SV=1	5	5	4	5	4	30.6	37.652	0.64207	0.64363	9.2768	0.58161	0.67231	0.69558	0.55793	0.72517	0.65498	487890000	285430000	202460000	154680000	95685000	58992000	201580000	120270000	81312000	131630000	69477000	62152000
sp|P07602|SAP_HUMAN;sp|P07602-2|SAP_HUMAN;sp|P07602-3|SAP_HUMAN	sp|P07602|SAP_HUMAN;sp|P07602-2|SAP_HUMAN;sp|P07602-3|SAP_HUMAN	sp|P07602|SAP_HUMAN Prosaposin OS=Homo sapiens OX=9606 GN=PSAP PE=1 SV=2;sp|P07602-2|SAP_HUMAN Isoform Sap-mu-6 of Prosaposin OS=Homo sapiens OX=9606 GN=PSAP;sp|P07602-3|SAP_HUMAN Isoform Sap-mu-9 of Prosaposin OS=Homo sapiens OX=9606 GN=PSAP	1	1	1	1	1	2.9	4.3663	0.68636	0.64597	14.908	0.65373	0.77487	NaN	0.60739	0.81033	NaN	186410000	106610000	79804000	72531000	42698000	29834000	87055000	48990000	38066000	26826000	14921000	11904000
sp|P55957|BID_HUMAN;sp|P55957-2|BID_HUMAN;sp|P55957-4|BID_HUMAN;sp|P55957-3|BID_HUMAN	sp|P55957|BID_HUMAN;sp|P55957-2|BID_HUMAN	sp|P55957|BID_HUMAN BH3-interacting domain death agonist OS=Homo sapiens OX=9606 GN=BID PE=1 SV=1;sp|P55957-2|BID_HUMAN Isoform 2 of BH3-interacting domain death agonist OS=Homo sapiens OX=9606 GN=BID	3	3	2	2	1	28.7	17.051	0.66449	0.64967	23.671	0.59841	0.67055	0.54596	0.57906	0.71188	0.54954	82117000	43534000	38583000	34628000	21197000	13430000	33049000	13817000	19232000	14440000	8519200	5920800
sp|O60885-2|BRD4_HUMAN;sp|O60885-3|BRD4_HUMAN;sp|O60885|BRD4_HUMAN	sp|O60885-2|BRD4_HUMAN;sp|O60885-3|BRD4_HUMAN;sp|O60885|BRD4_HUMAN	sp|O60885-2|BRD4_HUMAN Isoform C of Bromodomain-containing protein 4 OS=Homo sapiens OX=9606 GN=BRD4;sp|O60885-3|BRD4_HUMAN Isoform B of Bromodomain-containing protein 4 OS=Homo sapiens OX=9606 GN=BRD4;sp|O60885|BRD4_HUMAN Bromodomain-containing protein 4	1	1	1	1	1	2.4	4.839	0.68469	0.64976	1.9863	NaN	NaN	0.69955	NaN	NaN	0.64976	67970000	44066000	23904000	19964000	13493000	6470400	17623000	13791000	3831400	30383000	16781000	13602000
sp|P63218|GBG5_HUMAN;sp|A0A804HLA8|GBG5B_HUMAN	sp|P63218|GBG5_HUMAN;sp|A0A804HLA8|GBG5B_HUMAN	sp|P63218|GBG5_HUMAN Guanine nucleotide-binding protein G(I)/G(S)/G(O) subunit gamma-5 OS=Homo sapiens OX=9606 GN=GNG5 PE=1 SV=3;sp|A0A804HLA8|GBG5B_HUMAN Guanine nucleotide-binding protein G(I)/G(S)/G(O) subunit gamma-5B OS=Homo sapiens OX=9606 GN=GNG5B P	1	1	1	1	1	39.7	2.6962	0.66762	0.65018	12.179	0.67733	0.71509	0.61025	0.64123	0.75421	0.57471	172690000	108390000	64293000	56033000	37434000	18599000	69902000	42797000	27106000	46751000	28163000	18588000
sp|O95139|NDUB6_HUMAN	sp|O95139|NDUB6_HUMAN	sp|O95139|NDUB6_HUMAN NADH dehydrogenase [ubiquinone] 1 beta subcomplex subunit 6 OS=Homo sapiens OX=9606 GN=NDUFB6 PE=1 SV=3	1	1	1	1	1	14.1	3.4393	0.64279	0.65491	5.4522	0.64279	0.62958	0.65028	0.64465	0.68688	0.65548	63265000	37765000	25500000	27772000	17110000	10662000	17951000	10243000	7707500	17543000	10412000	7130100
sp|Q5JTJ3-3|COA6_HUMAN;sp|Q5JTJ3|COA6_HUMAN;sp|Q5JTJ3-2|COA6_HUMAN	sp|Q5JTJ3-3|COA6_HUMAN;sp|Q5JTJ3|COA6_HUMAN;sp|Q5JTJ3-2|COA6_HUMAN	sp|Q5JTJ3-3|COA6_HUMAN Isoform 3 of Cytochrome c oxidase assembly factor 6 homolog OS=Homo sapiens OX=9606 GN=COA6;sp|Q5JTJ3|COA6_HUMAN Cytochrome c oxidase assembly factor 6 homolog OS=Homo sapiens OX=9606 GN=COA6 PE=1 SV=1;sp|Q5JTJ3-2|COA6_HUMAN Isoform	1	1	1	1	1	17.7	4.4153	0.7124	0.65549	8.77	0.70709	NaN	0.73676	0.64298	NaN	0.67588	291720000	189720000	101990000	118580000	69441000	49141000	92186000	76230000	15956000	80951000	44054000	36897000
sp|P83916|CBX1_HUMAN	sp|P83916|CBX1_HUMAN	sp|P83916|CBX1_HUMAN Chromobox protein homolog 1 OS=Homo sapiens OX=9606 GN=CBX1 PE=1 SV=1	3	3	2	2	3	40	19.125	0.6419	0.65571	43.186	NaN	NaN	0.92655	NaN	NaN	0.94597	105080000	29456000	75623000	34581000	3415000	31166000	20397000	0	20397000	50101000	26041000	24061000
sp|P68036|UB2L3_HUMAN;sp|P68036-3|UB2L3_HUMAN;sp|P68036-2|UB2L3_HUMAN;sp|A0A1B0GUS4|UB2L5_HUMAN	sp|P68036|UB2L3_HUMAN;sp|P68036-3|UB2L3_HUMAN;sp|P68036-2|UB2L3_HUMAN;sp|A0A1B0GUS4|UB2L5_HUMAN	sp|P68036|UB2L3_HUMAN Ubiquitin-conjugating enzyme E2 L3 OS=Homo sapiens OX=9606 GN=UBE2L3 PE=1 SV=1;sp|P68036-3|UB2L3_HUMAN Isoform 3 of Ubiquitin-conjugating enzyme E2 L3 OS=Homo sapiens OX=9606 GN=UBE2L3;sp|P68036-2|UB2L3_HUMAN Isoform 2 of Ubiquitin-co	4	4	3	3	3	41.6	48.906	0.668	0.65585	21.175	0.5452	0.70814	0.6529	0.59907	0.74095	0.60526	1268400000	752710000	515670000	450030000	267560000	182480000	393790000	235650000	158140000	424560000	249500000	175050000
sp|P62841|RS15_HUMAN	sp|P62841|RS15_HUMAN	sp|P62841|RS15_HUMAN 40S ribosomal protein S15 OS=Homo sapiens OX=9606 GN=RPS15 PE=1 SV=2	5	5	3	2	4	53.1	13.566	0.66138	0.65747	39.328	0.87818	0.58502	0.78684	0.88369	0.63226	0.76604	546280000	282120000	264160000	64580000	32177000	32403000	226730000	134920000	91815000	254970000	115020000	139940000
sp|O00767|SCD_HUMAN	sp|O00767|SCD_HUMAN	sp|O00767|SCD_HUMAN Stearoyl-CoA desaturase OS=Homo sapiens OX=9606 GN=SCD PE=1 SV=2	4	4	4	3	3	17.8	25.866	0.70095	0.65762	32.561	0.74202	0.63382	0.73933	0.68554	0.68289	0.68208	657190000	360140000	297050000	248000000	129390000	118610000	227080000	133830000	93255000	182110000	96922000	85186000
sp|Q9Y6A5|TACC3_HUMAN	sp|Q9Y6A5|TACC3_HUMAN	sp|Q9Y6A5|TACC3_HUMAN Transforming acidic coiled-coil-containing protein 3 OS=Homo sapiens OX=9606 GN=TACC3 PE=1 SV=1	4	4	2	2	1	9.4	4.6442	0.62161	0.66171	30.787	0.85862	NaN	NaN	0.81609	NaN	NaN	33108000	16255000	16853000	18111000	7646000	10465000	10929000	8609200	2320200	4067500	0	4067500
sp|Q9P035|HACD3_HUMAN;sp|Q9P035-2|HACD3_HUMAN	sp|Q9P035|HACD3_HUMAN;sp|Q9P035-2|HACD3_HUMAN	sp|Q9P035|HACD3_HUMAN Very-long-chain (3R)-3-hydroxyacyl-CoA dehydratase 3 OS=Homo sapiens OX=9606 GN=HACD3 PE=1 SV=2;sp|Q9P035-2|HACD3_HUMAN Isoform 2 of Very-long-chain (3R)-3-hydroxyacyl-CoA dehydratase 3 OS=Homo sapiens OX=9606 GN=HACD3	10	10	8	8	8	32.6	39.889	0.69777	0.66295	25.533	0.71539	0.74645	0.69313	0.67138	0.79088	0.6486	1057200000	603050000	454130000	317590000	182520000	135070000	425070000	241660000	183410000	314520000	178870000	135650000
sp|Q8N6N3-2|CA052_HUMAN;sp|Q8N6N3|CA052_HUMAN	sp|Q8N6N3-2|CA052_HUMAN;sp|Q8N6N3|CA052_HUMAN	sp|Q8N6N3-2|CA052_HUMAN Isoform 2 of UPF0690 protein C1orf52 OS=Homo sapiens OX=9606 GN=C1orf52;sp|Q8N6N3|CA052_HUMAN UPF0690 protein C1orf52 OS=Homo sapiens OX=9606 GN=C1orf52 PE=1 SV=1	1	1	1	0	1	8.4	2.6244	0.67335	0.66339	4.9993	NaN	NaN	NaN	NaN	NaN	NaN	24652000	10632000	14020000	15336000	4913300	10422000	0	0	0	9316400	5718500	3597900
sp|Q9NPH2-2|INO1_HUMAN;sp|Q9NPH2-3|INO1_HUMAN;sp|Q9NPH2|INO1_HUMAN	sp|Q9NPH2-2|INO1_HUMAN;sp|Q9NPH2-3|INO1_HUMAN;sp|Q9NPH2|INO1_HUMAN	sp|Q9NPH2-2|INO1_HUMAN Isoform 2 of Inositol-3-phosphate synthase 1 OS=Homo sapiens OX=9606 GN=ISYNA1;sp|Q9NPH2-3|INO1_HUMAN Isoform 3 of Inositol-3-phosphate synthase 1 OS=Homo sapiens OX=9606 GN=ISYNA1;sp|Q9NPH2|INO1_HUMAN Inositol-3-phosphate synthase 1	5	5	2	3	2	19.8	8.3876	0.70271	0.66355	41.157	NaN	0.87586	0.65791	NaN	0.93942	0.64599	62653000	43684000	18969000	16737000	15083000	1654000	31596000	20830000	10767000	14320000	7771900	6548000
sp|O75691|UTP20_HUMAN	sp|O75691|UTP20_HUMAN	sp|O75691|UTP20_HUMAN Small subunit processome component 20 homolog OS=Homo sapiens OX=9606 GN=UTP20 PE=1 SV=3	3	3	3	2	1	1.4	3.6694	0.60703	0.66383	45.053	0.64066	0.60817	0.43835	0.69913	0.67475	0.45352	41819000	24384000	17435000	17561000	10436000	7125600	14906000	8974600	5931400	9352000	4973900	4378100
sp|Q9NRP0|OSTC_HUMAN;sp|Q9NRP0-2|OSTC_HUMAN	sp|Q9NRP0|OSTC_HUMAN;sp|Q9NRP0-2|OSTC_HUMAN	sp|Q9NRP0|OSTC_HUMAN Oligosaccharyltransferase complex subunit OSTC OS=Homo sapiens OX=9606 GN=OSTC PE=1 SV=1;sp|Q9NRP0-2|OSTC_HUMAN Isoform 2 of Oligosaccharyltransferase complex subunit OSTC OS=Homo sapiens OX=9606 GN=OSTC	2	2	2	2	1	12.1	19.195	0.65305	0.66704	7.1191	0.64848	0.65227	0.72853	0.58197	0.68199	0.6828	210720000	145380000	65346000	69778000	54503000	15275000	83887000	58570000	25317000	57056000	32303000	24754000
sp|Q9BXW6-2|OSBL1_HUMAN;sp|Q9BXW6-4|OSBL1_HUMAN;sp|Q9BXW6|OSBL1_HUMAN	sp|Q9BXW6-2|OSBL1_HUMAN;sp|Q9BXW6-4|OSBL1_HUMAN;sp|Q9BXW6|OSBL1_HUMAN	sp|Q9BXW6-2|OSBL1_HUMAN Isoform A of Oxysterol-binding protein-related protein 1 OS=Homo sapiens OX=9606 GN=OSBPL1A;sp|Q9BXW6-4|OSBL1_HUMAN Isoform 4 of Oxysterol-binding protein-related protein 1 OS=Homo sapiens OX=9606 GN=OSBPL1A;sp|Q9BXW6|OSBL1_HUMAN Ox	1	1	0	1	1	3.2	2.3724	0.67063	0.66744	18.903	NaN	NaN	0.6218	NaN	NaN	0.60363	16162000	9537700	6624700	0	0	0	5078200	3122700	1955500	11084000	6415000	4669200
sp|O60508|PRP17_HUMAN	sp|O60508|PRP17_HUMAN	sp|O60508|PRP17_HUMAN Pre-mRNA-processing factor 17 OS=Homo sapiens OX=9606 GN=CDC40 PE=1 SV=1	1	1	0	1	1	2.8	2.8236	0.66006	0.67103	2.6186	NaN	NaN	0.66751	NaN	NaN	0.66758	24374000	13763000	10612000	0	0	0	7971100	4511600	3459500	16403000	9250900	7152100
sp|Q9BVK6|TMED9_HUMAN	sp|Q9BVK6|TMED9_HUMAN	sp|Q9BVK6|TMED9_HUMAN Transmembrane emp24 domain-containing protein 9 OS=Homo sapiens OX=9606 GN=TMED9 PE=1 SV=2	2	2	1	2	2	12.8	14.288	0.68135	0.67121	6.6646	NaN	NaN	0.67347	NaN	NaN	0.62907	167750000	129230000	38516000	17772000	9520600	8251100	80245000	70423000	9822400	69734000	49291000	20443000
sp|P31949|S10AB_HUMAN	sp|P31949|S10AB_HUMAN	sp|P31949|S10AB_HUMAN Protein S100-A11 OS=Homo sapiens OX=9606 GN=S100A11 PE=1 SV=2	4	4	4	4	4	43.8	29.693	0.73515	0.67442	33.941	0.71575	0.80389	0.73515	0.64123	0.83973	0.67442	829640000	480990000	348650000	263050000	152330000	110730000	296920000	177480000	119440000	269670000	151180000	118480000
sp|P61586|RHOA_HUMAN	sp|P61586|RHOA_HUMAN	sp|P61586|RHOA_HUMAN Transforming protein RhoA OS=Homo sapiens OX=9606 GN=RHOA PE=1 SV=1	6	1	6	5	6	39.4	94.192	0.73036	0.6788	22.267	0.56308	0.74379	0.75314	0.5141	0.79287	0.69161	255040000	146700000	108340000	65451000	42147000	23305000	87670000	48313000	39357000	101920000	56242000	45674000
sp|P04637-5|P53_HUMAN;sp|P04637-6|P53_HUMAN;sp|P04637-2|P53_HUMAN;sp|P04637-3|P53_HUMAN;sp|P04637-4|P53_HUMAN;sp|P04637|P53_HUMAN;sp|P04637-8|P53_HUMAN;sp|P04637-9|P53_HUMAN;sp|P04637-7|P53_HUMAN	sp|P04637-5|P53_HUMAN;sp|P04637-6|P53_HUMAN;sp|P04637-2|P53_HUMAN;sp|P04637-3|P53_HUMAN;sp|P04637-4|P53_HUMAN;sp|P04637|P53_HUMAN;sp|P04637-8|P53_HUMAN;sp|P04637-9|P53_HUMAN;sp|P04637-7|P53_HUMAN	sp|P04637-5|P53_HUMAN Isoform 5 of Cellular tumor antigen p53 OS=Homo sapiens OX=9606 GN=TP53;sp|P04637-6|P53_HUMAN Isoform 6 of Cellular tumor antigen p53 OS=Homo sapiens OX=9606 GN=TP53;sp|P04637-2|P53_HUMAN Isoform 2 of Cellular tumor antigen p53 OS=Hom	2	2	2	1	2	10.3	12.916	0.71302	0.68119	10.406	0.6946	0.77421	0.71302	0.65619	0.81731	0.68119	191500000	100780000	90721000	50912000	24141000	26770000	66603000	37617000	28986000	73982000	39017000	34965000
sp|Q0VF96|CGNL1_HUMAN	sp|Q0VF96|CGNL1_HUMAN	sp|Q0VF96|CGNL1_HUMAN Cingulin-like protein 1 OS=Homo sapiens OX=9606 GN=CGNL1 PE=1 SV=2	1	1	1	1	1	0.7	2.2462	0.73044	0.68164	3.2171	NaN	NaN	NaN	NaN	NaN	NaN	95416000	53170000	42246000	32505000	18582000	13924000	35694000	20828000	14867000	27216000	13760000	13456000
sp|Q92615|LAR4B_HUMAN	sp|Q92615|LAR4B_HUMAN	sp|Q92615|LAR4B_HUMAN La-related protein 4B OS=Homo sapiens OX=9606 GN=LARP4B PE=1 SV=3	3	3	1	3	0	6.8	6.471	0.65677	0.68201	15.084	NaN	0.70646	NaN	NaN	0.75273	NaN	46726000	32295000	14431000	10878000	6578500	4299200	35849000	25716000	10132000	0	0	0
sp|Q7Z7H8|RM10_HUMAN;sp|Q7Z7H8-2|RM10_HUMAN	sp|Q7Z7H8|RM10_HUMAN;sp|Q7Z7H8-2|RM10_HUMAN	sp|Q7Z7H8|RM10_HUMAN 39S ribosomal protein L10, mitochondrial OS=Homo sapiens OX=9606 GN=MRPL10 PE=1 SV=3;sp|Q7Z7H8-2|RM10_HUMAN Isoform 2 of 39S ribosomal protein L10, mitochondrial OS=Homo sapiens OX=9606 GN=MRPL10	1	1	1	1	1	7.3	3.2287	0.63753	0.68281	14.835	0.53192	0.63753	0.71343	0.52448	0.6965	0.69437	55658000	32612000	23046000	15161000	9944800	5216400	19395000	11118000	8276000	21102000	11548000	9553600
sp|Q9NQ50|RM40_HUMAN	sp|Q9NQ50|RM40_HUMAN	sp|Q9NQ50|RM40_HUMAN 39S ribosomal protein L40, mitochondrial OS=Homo sapiens OX=9606 GN=MRPL40 PE=1 SV=1	3	3	3	2	1	21.8	8.9295	0.70754	0.68306	3.0131	0.69131	0.82616	0.75589	0.6587	0.87491	0.69777	214210000	107260000	106950000	84123000	42816000	41307000	66461000	30028000	36433000	63628000	34413000	29215000
sp|P08243|ASNS_HUMAN;sp|P08243-2|ASNS_HUMAN;sp|P08243-3|ASNS_HUMAN	sp|P08243|ASNS_HUMAN;sp|P08243-2|ASNS_HUMAN;sp|P08243-3|ASNS_HUMAN	sp|P08243|ASNS_HUMAN Asparagine synthetase [glutamine-hydrolyzing] OS=Homo sapiens OX=9606 GN=ASNS PE=1 SV=4;sp|P08243-2|ASNS_HUMAN Isoform 2 of Asparagine synthetase [glutamine-hydrolyzing] OS=Homo sapiens OX=9606 GN=ASNS;sp|P08243-3|ASNS_HUMAN Isoform 3	14	14	11	12	14	34.4	57.681	0.7062	0.68338	27.755	0.83195	0.68291	0.6594	0.75316	0.72591	0.6039	2948300000	1698500000	1249800000	886530000	494400000	392120000	1047100000	617170000	429970000	1014600000	586920000	427680000
sp|P12694|ODBA_HUMAN;sp|P12694-2|ODBA_HUMAN	sp|P12694|ODBA_HUMAN;sp|P12694-2|ODBA_HUMAN	sp|P12694|ODBA_HUMAN 2-oxoisovalerate dehydrogenase subunit alpha, mitochondrial OS=Homo sapiens OX=9606 GN=BCKDHA PE=1 SV=2;sp|P12694-2|ODBA_HUMAN Isoform 2 of 2-oxoisovalerate dehydrogenase subunit alpha, mitochondrial OS=Homo sapiens OX=9606 GN=BCKDHA	1	1	0	1	1	3.6	4.1609	0.63442	0.68339	14.35	NaN	0.67631	0.59284	NaN	0.77132	0.60272	14630000	8307600	6322600	0	0	0	7367900	3806500	3561400	7262400	4501200	2761200
sp|P57076|CF298_HUMAN	sp|P57076|CF298_HUMAN	sp|P57076|CF298_HUMAN Cilia- and flagella-associated protein 298 OS=Homo sapiens OX=9606 GN=CFAP298 PE=1 SV=1	1	1	1	1	1	9	8.1358	0.70084	0.68342	14.053	NaN	0.73991	0.66728	NaN	0.80609	0.67234	83208000	47950000	35258000	10433000	5873300	4559400	37580000	22365000	15215000	35196000	19712000	15483000
sp|Q9NV56|MRGBP_HUMAN	sp|Q9NV56|MRGBP_HUMAN	sp|Q9NV56|MRGBP_HUMAN MRG/MORF4L-binding protein OS=Homo sapiens OX=9606 GN=MRGBP PE=1 SV=1	1	1	0	1	1	6.4	3.037	0.63729	0.68526	3.2027	NaN	0.62406	0.64881	NaN	0.69589	0.66418	18446000	10564000	7881700	0	0	0	9435900	5302300	4133600	9010000	5261900	3748100
sp|O75330-4|HMMR_HUMAN;sp|O75330-2|HMMR_HUMAN;sp|O75330|HMMR_HUMAN;sp|O75330-3|HMMR_HUMAN	sp|O75330-4|HMMR_HUMAN;sp|O75330-2|HMMR_HUMAN;sp|O75330|HMMR_HUMAN;sp|O75330-3|HMMR_HUMAN	sp|O75330-4|HMMR_HUMAN Isoform 4 of Hyaluronan mediated motility receptor OS=Homo sapiens OX=9606 GN=HMMR;sp|O75330-2|HMMR_HUMAN Isoform 2 of Hyaluronan mediated motility receptor OS=Homo sapiens OX=9606 GN=HMMR;sp|O75330|HMMR_HUMAN Hyaluronan mediated mot	2	2	1	2	2	3.4	3.9285	0.69141	0.68541	19.674	NaN	0.84897	0.85283	NaN	0.8942	0.81789	169620000	81783000	87834000	61397000	28025000	33372000	59272000	30982000	28290000	48948000	22776000	26172000
sp|Q9GZZ9|UBA5_HUMAN;sp|Q9GZZ9-2|UBA5_HUMAN	sp|Q9GZZ9|UBA5_HUMAN;sp|Q9GZZ9-2|UBA5_HUMAN	sp|Q9GZZ9|UBA5_HUMAN Ubiquitin-like modifier-activating enzyme 5 OS=Homo sapiens OX=9606 GN=UBA5 PE=1 SV=1;sp|Q9GZZ9-2|UBA5_HUMAN Isoform 2 of Ubiquitin-like modifier-activating enzyme 5 OS=Homo sapiens OX=9606 GN=UBA5	5	5	5	2	3	17.1	11.173	0.70028	0.68561	40.649	0.46271	0.56872	0.52465	0.44626	0.61201	0.51434	122430000	62487000	59940000	46678000	20278000	26400000	25465000	17696000	7768800	50285000	24513000	25771000
sp|Q9UHA4-2|LTOR3_HUMAN;sp|Q9UHA4|LTOR3_HUMAN	sp|Q9UHA4-2|LTOR3_HUMAN;sp|Q9UHA4|LTOR3_HUMAN	sp|Q9UHA4-2|LTOR3_HUMAN Isoform 2 of Ragulator complex protein LAMTOR3 OS=Homo sapiens OX=9606 GN=LAMTOR3;sp|Q9UHA4|LTOR3_HUMAN Ragulator complex protein LAMTOR3 OS=Homo sapiens OX=9606 GN=LAMTOR3 PE=1 SV=1	2	2	1	1	2	28.2	4.8153	0.68055	0.68564	26.391	0.91521	0.73596	0.68055	0.88216	0.79355	0.68564	84437000	45483000	38954000	25283000	12185000	13098000	25674000	14383000	11292000	33480000	18915000	14565000
sp|P13489|RINI_HUMAN	sp|P13489|RINI_HUMAN	sp|P13489|RINI_HUMAN Ribonuclease inhibitor OS=Homo sapiens OX=9606 GN=RNH1 PE=1 SV=2	11	11	9	10	8	38.6	100.02	0.73684	0.68712	34.828	0.73107	0.73328	0.72225	0.66728	0.77716	0.66279	1181700000	600360000	581300000	344970000	143520000	201450000	477130000	283510000	193620000	359560000	173330000	186230000
sp|Q96AC1-2|FERM2_HUMAN;sp|Q96AC1|FERM2_HUMAN;sp|Q96AC1-3|FERM2_HUMAN;sp|Q9BQL6-4|FERM1_HUMAN;sp|Q9BQL6-2|FERM1_HUMAN;sp|Q9BQL6|FERM1_HUMAN	sp|Q96AC1-2|FERM2_HUMAN;sp|Q96AC1|FERM2_HUMAN;sp|Q96AC1-3|FERM2_HUMAN	sp|Q96AC1-2|FERM2_HUMAN Isoform 2 of Fermitin family homolog 2 OS=Homo sapiens OX=9606 GN=FERMT2;sp|Q96AC1|FERM2_HUMAN Fermitin family homolog 2 OS=Homo sapiens OX=9606 GN=FERMT2 PE=1 SV=1;sp|Q96AC1-3|FERM2_HUMAN Isoform 3 of Fermitin family homolog 2 OS=H	5	5	3	5	3	14.2	20.831	0.69741	0.68889	32.641	0.87816	0.66611	0.91063	0.82053	0.70004	0.84579	226740000	127340000	99397000	59598000	37096000	22502000	93652000	49402000	44250000	73488000	40844000	32644000
sp|Q09028-3|RBBP4_HUMAN;sp|Q09028|RBBP4_HUMAN;sp|Q09028-4|RBBP4_HUMAN;sp|Q09028-2|RBBP4_HUMAN	sp|Q09028-3|RBBP4_HUMAN;sp|Q09028|RBBP4_HUMAN;sp|Q09028-4|RBBP4_HUMAN;sp|Q09028-2|RBBP4_HUMAN	sp|Q09028-3|RBBP4_HUMAN Isoform 3 of Histone-binding protein RBBP4 OS=Homo sapiens OX=9606 GN=RBBP4;sp|Q09028|RBBP4_HUMAN Histone-binding protein RBBP4 OS=Homo sapiens OX=9606 GN=RBBP4 PE=1 SV=3;sp|Q09028-4|RBBP4_HUMAN Isoform 4 of Histone-binding protein	6	6	6	5	6	44.4	85.013	0.67538	0.69203	53.887	0.65036	0.73349	0.6526	0.58876	0.77382	0.60562	1518300000	750700000	767560000	590390000	317100000	273290000	457130000	214420000	242710000	470750000	219190000	251570000
sp|Q9NYK5|RM39_HUMAN;sp|Q9NYK5-2|RM39_HUMAN	sp|Q9NYK5|RM39_HUMAN;sp|Q9NYK5-2|RM39_HUMAN	sp|Q9NYK5|RM39_HUMAN 39S ribosomal protein L39, mitochondrial OS=Homo sapiens OX=9606 GN=MRPL39 PE=1 SV=3;sp|Q9NYK5-2|RM39_HUMAN Isoform 2 of 39S ribosomal protein L39, mitochondrial OS=Homo sapiens OX=9606 GN=MRPL39	2	2	1	2	1	8	6.4911	0.75597	0.69396	17.702	0.82747	NaN	NaN	0.73886	NaN	NaN	89374000	46876000	42498000	53447000	29939000	23508000	19214000	9531000	9683000	16712000	7405800	9306500
sp|O14617-4|AP3D1_HUMAN;sp|O14617|AP3D1_HUMAN;sp|O14617-5|AP3D1_HUMAN;sp|O14617-3|AP3D1_HUMAN;sp|O14617-2|AP3D1_HUMAN	sp|O14617-4|AP3D1_HUMAN;sp|O14617|AP3D1_HUMAN;sp|O14617-5|AP3D1_HUMAN;sp|O14617-3|AP3D1_HUMAN;sp|O14617-2|AP3D1_HUMAN	sp|O14617-4|AP3D1_HUMAN Isoform 4 of AP-3 complex subunit delta-1 OS=Homo sapiens OX=9606 GN=AP3D1;sp|O14617|AP3D1_HUMAN AP-3 complex subunit delta-1 OS=Homo sapiens OX=9606 GN=AP3D1 PE=1 SV=1;sp|O14617-5|AP3D1_HUMAN Isoform 5 of AP-3 complex subunit delta	10	10	8	7	9	13.9	47.488	0.67575	0.69416	44.326	0.63456	0.61853	0.75853	0.65369	0.66722	0.73738	246280000	143710000	102560000	86790000	55417000	31373000	58861000	37301000	21560000	100620000	50997000	49628000
sp|P61619|S61A1_HUMAN	sp|P61619|S61A1_HUMAN	sp|P61619|S61A1_HUMAN Protein transport protein Sec61 subunit alpha isoform 1 OS=Homo sapiens OX=9606 GN=SEC61A1 PE=1 SV=2	1	1	1	1	1	2.9	5.1577	0.73838	0.6946	6.2407	0.77453	0.61586	0.73838	0.7515	0.65087	0.6946	180130000	99342000	80787000	47190000	24078000	23112000	57520000	33809000	23711000	75418000	41455000	33963000
sp|O43390-2|HNRPR_HUMAN;sp|O43390-4|HNRPR_HUMAN	sp|O43390-2|HNRPR_HUMAN;sp|O43390-4|HNRPR_HUMAN	sp|O43390-2|HNRPR_HUMAN Isoform 2 of Heterogeneous nuclear ribonucleoprotein R OS=Homo sapiens OX=9606 GN=HNRNPR;sp|O43390-4|HNRPR_HUMAN Isoform 4 of Heterogeneous nuclear ribonucleoprotein R OS=Homo sapiens OX=9606 GN=HNRNPR	1	1	1	1	1	42.1	5.7659	0.74095	0.69557	12.541	0.74502	0.84469	0.72372	0.68729	0.88159	0.66992	187210000	96286000	90928000	66040000	36012000	30028000	55004000	29019000	25985000	66170000	31255000	34914000
sp|P61964|WDR5_HUMAN	sp|P61964|WDR5_HUMAN	sp|P61964|WDR5_HUMAN WD repeat-containing protein 5 OS=Homo sapiens OX=9606 GN=WDR5 PE=1 SV=1	1	1	1	1	0	4.2	2.3518	0.68067	0.69572	5.3009	NaN	NaN	NaN	NaN	NaN	NaN	22442000	12798000	9643300	11534000	6159300	5374800	10908000	6639000	4268500	0	0	0
sp|P13674-3|P4HA1_HUMAN;sp|P13674-2|P4HA1_HUMAN;sp|P13674|P4HA1_HUMAN	sp|P13674-3|P4HA1_HUMAN;sp|P13674-2|P4HA1_HUMAN;sp|P13674|P4HA1_HUMAN	sp|P13674-3|P4HA1_HUMAN Isoform 3 of Prolyl 4-hydroxylase subunit alpha-1 OS=Homo sapiens OX=9606 GN=P4HA1;sp|P13674-2|P4HA1_HUMAN Isoform 2 of Prolyl 4-hydroxylase subunit alpha-1 OS=Homo sapiens OX=9606 GN=P4HA1;sp|P13674|P4HA1_HUMAN Prolyl 4-hydroxylase	3	3	1	3	1	8.1	3.026	0.63435	0.69623	18.49	NaN	0.66731	NaN	NaN	0.73148	NaN	22714000	16302000	6411900	0	0	0	16590000	12364000	4226200	6124300	3938600	2185700
sp|P06280|AGAL_HUMAN	sp|P06280|AGAL_HUMAN	sp|P06280|AGAL_HUMAN Alpha-galactosidase A OS=Homo sapiens OX=9606 GN=GLA PE=1 SV=1	6	6	6	6	6	17.9	23.991	0.68681	0.69635	30.544	0.65167	0.78681	0.84977	0.59578	0.84579	0.85294	345130000	230060000	115070000	124410000	84956000	39458000	132170000	80510000	51656000	88550000	64593000	23958000
sp|Q13557-5|KCC2D_HUMAN;sp|Q13557-8|KCC2D_HUMAN;sp|Q13557-11|KCC2D_HUMAN;sp|Q13557-4|KCC2D_HUMAN;sp|Q13557-9|KCC2D_HUMAN;sp|Q13557-10|KCC2D_HUMAN;sp|Q13557-12|KCC2D_HUMAN;sp|Q13557-6|KCC2D_HUMAN;sp|Q13557-3|KCC2D_HUMAN;sp|Q13557|KCC2D_HUMAN;sp|Q13554-2|KCC2B_HUMAN;sp|Q13555-11|KCC2G_HUMAN;sp|Q13554-7|KCC2B_HUMAN;sp|Q13555-4|KCC2G_HUMAN;sp|Q13555-9|KCC2G_HUMAN;sp|Q13555-2|KCC2G_HUMAN;sp|Q13555-8|K…	sp|Q13557-5|KCC2D_HUMAN;sp|Q13557-8|KCC2D_HUMAN;sp|Q13557-11|KCC2D_HUMAN;sp|Q13557-4|KCC2D_HUMAN;sp|Q13557-9|KCC2D_HUMAN;sp|Q13557-10|KCC2D_HUMAN;sp|Q13557-12|KCC2D_HUMAN;sp|Q13557-6|KCC2D_HUMAN;sp|Q13557-3|KCC2D_HUMAN;sp|Q13557|KCC2D_HUMAN;sp|Q13554-2|KCC2B_HUMAN;sp|Q13555-11|KCC2G_HUMAN;sp|Q13554-7|KCC2B_HUMAN;sp|Q13555-4|KCC2G_HUMAN;sp|Q13555-9|KCC2G_HUMAN;sp|Q13555-2|KCC2G_HUMAN;sp|Q13555-8|K…	sp|Q13557-5|KCC2D_HUMAN Isoform Delta 8 of Calcium/calmodulin-dependent protein kinase type II subunit delta OS=Homo sapiens OX=9606 GN=CAMK2D;sp|Q13557-8|KCC2D_HUMAN Isoform Delta 6 of Calcium/calmodulin-dependent protein kinase type II subunit delta OS=H	2	2	2	2	2	8.8	6.0458	0.71662	0.69853	1.5421	0.62264	0.71224	0.7519	0.60637	0.76362	0.70594	108240000	63463000	44777000	41142000	26075000	15067000	39044000	20526000	18518000	28055000	16863000	11192000
sp|P53634|CATC_HUMAN	sp|P53634|CATC_HUMAN	sp|P53634|CATC_HUMAN Dipeptidyl peptidase 1 OS=Homo sapiens OX=9606 GN=CTSC PE=1 SV=2	2	2	1	1	1	5	3.5006	0.6382	0.69863	46.185	NaN	NaN	NaN	NaN	NaN	NaN	38298000	27721000	10578000	3502800	2189100	1313700	23182000	13918000	9264200	11613000	11613000	0
sp|P11182|ODB2_HUMAN	sp|P11182|ODB2_HUMAN	sp|P11182|ODB2_HUMAN Lipoamide acyltransferase component of branched-chain alpha-keto acid dehydrogenase complex, mitochondrial OS=Homo sapiens OX=9606 GN=DBT PE=1 SV=3	2	2	1	1	1	7.1	4.4736	0.6296	0.69991	24.589	NaN	NaN	NaN	NaN	NaN	NaN	13262000	8206800	5055600	6091900	3716600	2375300	3059700	1703500	1356100	4110800	2786600	1324200
sp|Q99733|NP1L4_HUMAN;sp|Q99733-2|NP1L4_HUMAN	sp|Q99733|NP1L4_HUMAN;sp|Q99733-2|NP1L4_HUMAN	sp|Q99733|NP1L4_HUMAN Nucleosome assembly protein 1-like 4 OS=Homo sapiens OX=9606 GN=NAP1L4 PE=1 SV=1;sp|Q99733-2|NP1L4_HUMAN Isoform 2 of Nucleosome assembly protein 1-like 4 OS=Homo sapiens OX=9606 GN=NAP1L4	5	5	5	5	4	26.9	65.9	0.75091	0.70006	19.361	0.61271	0.79923	0.7595	0.55337	0.82324	0.70902	663460000	379780000	283680000	272170000	163330000	108830000	202190000	110110000	92071000	189100000	106330000	82774000
sp|Q96ST3|SIN3A_HUMAN	sp|Q96ST3|SIN3A_HUMAN	sp|Q96ST3|SIN3A_HUMAN Paired amphipathic helix protein Sin3a OS=Homo sapiens OX=9606 GN=SIN3A PE=1 SV=2	2	2	1	2	2	2	4.4674	0.71473	0.70039	5.4543	NaN	NaN	0.71473	NaN	NaN	0.70039	23348000	18121000	5227100	4107000	4107000	0	1943000	1943000	0	17298000	12071000	5227100
sp|Q86TP1-3|PRUN1_HUMAN;sp|Q86TP1-2|PRUN1_HUMAN;sp|Q86TP1|PRUN1_HUMAN;sp|Q86TP1-5|PRUN1_HUMAN;sp|Q86TP1-7|PRUN1_HUMAN;sp|Q86TP1-4|PRUN1_HUMAN	sp|Q86TP1-3|PRUN1_HUMAN;sp|Q86TP1-2|PRUN1_HUMAN;sp|Q86TP1|PRUN1_HUMAN;sp|Q86TP1-5|PRUN1_HUMAN;sp|Q86TP1-7|PRUN1_HUMAN;sp|Q86TP1-4|PRUN1_HUMAN	sp|Q86TP1-3|PRUN1_HUMAN Isoform 3 of Exopolyphosphatase PRUNE1 OS=Homo sapiens OX=9606 GN=PRUNE1;sp|Q86TP1-2|PRUN1_HUMAN Isoform 2 of Exopolyphosphatase PRUNE1 OS=Homo sapiens OX=9606 GN=PRUNE1;sp|Q86TP1|PRUN1_HUMAN Exopolyphosphatase PRUNE1 OS=Homo sapien	2	2	1	1	2	11.4	4.1714	0.78183	0.70097	14.492	0.67822	0.79965	0.78183	0.58402	0.81859	0.70097	1343800000	729360000	614490000	367800000	213800000	154000000	582510000	311680000	270830000	393530000	203880000	189660000
sp|P61960|UFM1_HUMAN;sp|P61960-2|UFM1_HUMAN	sp|P61960|UFM1_HUMAN;sp|P61960-2|UFM1_HUMAN	sp|P61960|UFM1_HUMAN Ubiquitin-fold modifier 1 OS=Homo sapiens OX=9606 GN=UFM1 PE=1 SV=1;sp|P61960-2|UFM1_HUMAN Isoform 2 of Ubiquitin-fold modifier 1 OS=Homo sapiens OX=9606 GN=UFM1	2	2	2	2	2	50.6	9.878	0.74153	0.70112	19.721	0.71651	0.77913	0.74153	0.6638	0.82213	0.68929	368390000	206640000	161760000	124960000	71579000	53376000	118110000	64633000	53475000	125330000	70426000	54905000
sp|Q8IXB1|DJC10_HUMAN;sp|Q8IXB1-2|DJC10_HUMAN;sp|Q8IXB1-3|DJC10_HUMAN	sp|Q8IXB1|DJC10_HUMAN;sp|Q8IXB1-2|DJC10_HUMAN;sp|Q8IXB1-3|DJC10_HUMAN	sp|Q8IXB1|DJC10_HUMAN DnaJ homolog subfamily C member 10 OS=Homo sapiens OX=9606 GN=DNAJC10 PE=1 SV=2;sp|Q8IXB1-2|DJC10_HUMAN Isoform 2 of DnaJ homolog subfamily C member 10 OS=Homo sapiens OX=9606 GN=DNAJC10;sp|Q8IXB1-3|DJC10_HUMAN Isoform 3 of DnaJ homol	2	2	2	1	1	3.4	5.2489	0.67035	0.70122	32.338	0.60508	NaN	NaN	0.67139	NaN	NaN	17564000	10729000	6835000	10368000	7149700	3218500	3194700	1461900	1732800	4000800	2117100	1883600
sp|Q16836|HCDH_HUMAN;sp|Q16836-3|HCDH_HUMAN;sp|Q16836-2|HCDH_HUMAN	sp|Q16836|HCDH_HUMAN;sp|Q16836-3|HCDH_HUMAN;sp|Q16836-2|HCDH_HUMAN	sp|Q16836|HCDH_HUMAN Hydroxyacyl-coenzyme A dehydrogenase, mitochondrial OS=Homo sapiens OX=9606 GN=HADH PE=1 SV=3;sp|Q16836-3|HCDH_HUMAN Isoform 3 of Hydroxyacyl-coenzyme A dehydrogenase, mitochondrial OS=Homo sapiens OX=9606 GN=HADH;sp|Q16836-2|HCDH_HUMA	5	5	5	5	5	31.8	58.309	0.72049	0.70198	25.299	0.6595	0.72049	0.74269	0.60728	0.75935	0.68155	1584900000	869290000	715650000	444940000	256730000	188210000	627210000	339640000	287580000	512780000	272920000	239870000
sp|Q4G0F5|VP26B_HUMAN	sp|Q4G0F5|VP26B_HUMAN	sp|Q4G0F5|VP26B_HUMAN Vacuolar protein sorting-associated protein 26B OS=Homo sapiens OX=9606 GN=VPS26B PE=1 SV=2	3	3	1	1	1	13.4	4.5897	0.65117	0.70487	43.855	NaN	NaN	NaN	NaN	NaN	NaN	15001000	7576400	7425100	5539700	2390000	3149700	7052900	4059900	2993000	2408800	1126500	1282300
sp|Q9Y617|SERC_HUMAN;sp|Q9Y617-2|SERC_HUMAN	sp|Q9Y617|SERC_HUMAN;sp|Q9Y617-2|SERC_HUMAN	sp|Q9Y617|SERC_HUMAN Phosphoserine aminotransferase OS=Homo sapiens OX=9606 GN=PSAT1 PE=1 SV=2;sp|Q9Y617-2|SERC_HUMAN Isoform 2 of Phosphoserine aminotransferase OS=Homo sapiens OX=9606 GN=PSAT1	20	20	16	19	19	50	140.83	0.77219	0.70506	28.743	0.79011	0.64864	0.76415	0.69923	0.67885	0.68964	5555800000	3074900000	2480900000	1881400000	1017400000	864070000	1840400000	1068900000	771470000	1833900000	988610000	845330000
sp|Q9BQE3|TBA1C_HUMAN	sp|Q9BQE3|TBA1C_HUMAN	sp|Q9BQE3|TBA1C_HUMAN Tubulin alpha-1C chain OS=Homo sapiens OX=9606 GN=TUBA1C PE=1 SV=1	3	3	2	2	3	63.9	98.056	0.75652	0.70543	10.284	0.72037	0.7926	0.77519	0.6753	0.82879	0.70382	919730000	477980000	441750000	403780000	193450000	210320000	317030000	174100000	142930000	198920000	110430000	88492000
sp|Q9BTT0-3|AN32E_HUMAN;sp|Q9BTT0|AN32E_HUMAN;sp|Q9BTT0-2|AN32E_HUMAN	sp|Q9BTT0-3|AN32E_HUMAN;sp|Q9BTT0|AN32E_HUMAN	sp|Q9BTT0-3|AN32E_HUMAN Isoform 3 of Acidic leucine-rich nuclear phosphoprotein 32 family member E OS=Homo sapiens OX=9606 GN=ANP32E;sp|Q9BTT0|AN32E_HUMAN Acidic leucine-rich nuclear phosphoprotein 32 family member E OS=Homo sapiens OX=9606 GN=ANP32E PE=1	3	3	3	3	3	20.9	117.75	0.80941	0.70565	18.457	0.72374	0.82055	0.80966	0.65871	0.86603	0.70565	2542400000	1340900000	1201500000	849240000	449650000	399580000	896170000	473080000	423090000	796960000	418160000	378800000
sp|Q5XKP0|MIC13_HUMAN	sp|Q5XKP0|MIC13_HUMAN	sp|Q5XKP0|MIC13_HUMAN MICOS complex subunit MIC13 OS=Homo sapiens OX=9606 GN=MICOS13 PE=1 SV=1	1	1	1	1	1	18.6	3.7965	0.73014	0.70601	4.7393	NaN	0.69031	NaN	NaN	0.7337	NaN	88965000	67032000	21933000	31952000	25569000	6383300	29697000	19775000	9922100	27316000	21689000	5627600
sp|Q9UHR4|BI2L1_HUMAN	sp|Q9UHR4|BI2L1_HUMAN	sp|Q9UHR4|BI2L1_HUMAN Brain-specific angiogenesis inhibitor 1-associated protein 2-like protein 1 OS=Homo sapiens OX=9606 GN=BAIAP2L1 PE=1 SV=2	2	2	1	1	1	8.8	2.2404	0.6689	0.70636	43.787	NaN	NaN	0.6689	NaN	NaN	0.68261	20636000	10800000	9835800	5363700	3157300	2206400	3559500	1879500	1680000	11713000	5763500	5949400
sp|P46013-2|KI67_HUMAN;sp|P46013|KI67_HUMAN	sp|P46013-2|KI67_HUMAN;sp|P46013|KI67_HUMAN	sp|P46013-2|KI67_HUMAN Isoform Short of Proliferation marker protein Ki-67 OS=Homo sapiens OX=9606 GN=MKI67;sp|P46013|KI67_HUMAN Proliferation marker protein Ki-67 OS=Homo sapiens OX=9606 GN=MKI67 PE=1 SV=2	8	8	6	2	3	5	19.275	0.70841	0.70652	54.701	0.77626	0.5977	0.71551	0.80925	0.64291	0.6758	121990000	65440000	56553000	35521000	21486000	14035000	49147000	27159000	21988000	37325000	16795000	20530000
sp|O60488-2|ACSL4_HUMAN;sp|O60488|ACSL4_HUMAN	sp|O60488-2|ACSL4_HUMAN;sp|O60488|ACSL4_HUMAN	sp|O60488-2|ACSL4_HUMAN Isoform Short of Long-chain-fatty-acid--CoA ligase 4 OS=Homo sapiens OX=9606 GN=ACSL4;sp|O60488|ACSL4_HUMAN Long-chain-fatty-acid--CoA ligase 4 OS=Homo sapiens OX=9606 GN=ACSL4 PE=1 SV=2	2	2	2	2	2	10	3.7352	0.67209	0.70672	3.4871	0.64426	0.71981	0.69275	0.68903	0.78107	0.69501	92559000	53606000	38953000	25796000	14692000	11103000	32762000	19722000	13040000	34001000	19192000	14809000
sp|Q96CX2|KCD12_HUMAN	sp|Q96CX2|KCD12_HUMAN	sp|Q96CX2|KCD12_HUMAN BTB/POZ domain-containing protein KCTD12 OS=Homo sapiens OX=9606 GN=KCTD12 PE=1 SV=1	12	11	11	12	12	52.9	81.378	0.70972	0.70677	36.664	1.1178	0.67287	0.74557	0.98864	0.72341	0.71186	2731600000	1383600000	1347900000	870040000	408080000	461960000	983980000	528870000	455110000	877540000	446660000	430880000
sp|Q9UHI6-2|DDX20_HUMAN;sp|Q9UHI6|DDX20_HUMAN	sp|Q9UHI6-2|DDX20_HUMAN;sp|Q9UHI6|DDX20_HUMAN	sp|Q9UHI6-2|DDX20_HUMAN Isoform 2 of Probable ATP-dependent RNA helicase DDX20 OS=Homo sapiens OX=9606 GN=DDX20;sp|Q9UHI6|DDX20_HUMAN Probable ATP-dependent RNA helicase DDX20 OS=Homo sapiens OX=9606 GN=DDX20 PE=1 SV=2	2	2	1	2	2	18.8	6.5864	0.67984	0.70679	6.1527	0.61579	0.70595	0.64846	0.6021	0.76952	0.62898	102310000	58138000	44168000	19950000	12107000	7843000	49432000	26142000	23289000	32925000	19889000	13036000
sp|O15511|ARPC5_HUMAN;sp|O15511-2|ARPC5_HUMAN	sp|O15511|ARPC5_HUMAN;sp|O15511-2|ARPC5_HUMAN	sp|O15511|ARPC5_HUMAN Actin-related protein 2/3 complex subunit 5 OS=Homo sapiens OX=9606 GN=ARPC5 PE=1 SV=3;sp|O15511-2|ARPC5_HUMAN Isoform 2 of Actin-related protein 2/3 complex subunit 5 OS=Homo sapiens OX=9606 GN=ARPC5	2	2	2	2	2	28.5	8.3642	0.73999	0.70716	3.5208	0.74093	0.68392	0.78083	0.70613	0.73281	0.71748	85340000	48366000	36974000	34365000	18875000	15490000	24490000	13757000	10733000	26484000	15733000	10751000
sp|Q13043-2|STK4_HUMAN;sp|Q13043|STK4_HUMAN	sp|Q13043-2|STK4_HUMAN;sp|Q13043|STK4_HUMAN	sp|Q13043-2|STK4_HUMAN Isoform 2 of Serine/threonine-protein kinase 4 OS=Homo sapiens OX=9606 GN=STK4;sp|Q13043|STK4_HUMAN Serine/threonine-protein kinase 4 OS=Homo sapiens OX=9606 GN=STK4 PE=1 SV=2	1	1	1	1	1	3.5	2.6692	0.6822	0.70739	26.698	0.6822	NaN	0.84261	0.67791	NaN	0.919	36659000	19838000	16820000	19541000	10985000	8555500	5459700	2959500	2500200	11658000	5893600	5764500
sp|Q16658|FSCN1_HUMAN	sp|Q16658|FSCN1_HUMAN	sp|Q16658|FSCN1_HUMAN Fascin OS=Homo sapiens OX=9606 GN=FSCN1 PE=1 SV=3	10	10	6	7	10	30.4	49.894	0.74559	0.70756	33.666	0.68473	0.72715	0.75612	0.64645	0.75915	0.70004	1207200000	689080000	518090000	370590000	217480000	153100000	437590000	250340000	187240000	399000000	221260000	177750000
sp|Q92820|GGH_HUMAN	sp|Q92820|GGH_HUMAN	sp|Q92820|GGH_HUMAN Gamma-glutamyl hydrolase OS=Homo sapiens OX=9606 GN=GGH PE=1 SV=2	2	2	1	2	1	8.5	6.0989	0.70111	0.70777	17.164	0.5761	0.77715	0.71645	0.57162	0.85726	0.71728	62243000	32919000	29325000	15441000	9652800	5788400	26473000	11849000	14624000	20329000	11417000	8912100
sp|Q6DKJ4|NXN_HUMAN;sp|Q6DKJ4-3|NXN_HUMAN;sp|Q6DKJ4-2|NXN_HUMAN	sp|Q6DKJ4|NXN_HUMAN;sp|Q6DKJ4-3|NXN_HUMAN	sp|Q6DKJ4|NXN_HUMAN Nucleoredoxin OS=Homo sapiens OX=9606 GN=NXN PE=1 SV=2;sp|Q6DKJ4-3|NXN_HUMAN Isoform 3 of Nucleoredoxin OS=Homo sapiens OX=9606 GN=NXN	5	5	3	3	5	21.6	11.947	0.64356	0.70807	20.937	0.75311	0.63169	0.75177	0.79738	0.7297	0.74449	96673000	55825000	40847000	25104000	14872000	10233000	27557000	15621000	11937000	44011000	25333000	18678000
sp|Q96EY1|DNJA3_HUMAN;sp|Q96EY1-2|DNJA3_HUMAN;sp|Q96EY1-3|DNJA3_HUMAN	sp|Q96EY1|DNJA3_HUMAN;sp|Q96EY1-2|DNJA3_HUMAN;sp|Q96EY1-3|DNJA3_HUMAN	sp|Q96EY1|DNJA3_HUMAN DnaJ homolog subfamily A member 3, mitochondrial OS=Homo sapiens OX=9606 GN=DNAJA3 PE=1 SV=2;sp|Q96EY1-2|DNJA3_HUMAN Isoform 2 of DnaJ homolog subfamily A member 3, mitochondrial OS=Homo sapiens OX=9606 GN=DNAJA3;sp|Q96EY1-3|DNJA3_HUM	3	3	1	3	1	10.6	7.4048	0.65502	0.71209	6.1941	NaN	0.66441	0.62312	NaN	0.73058	0.57792	151010000	96892000	54121000	5836600	2991000	2845500	73595000	45925000	27670000	71581000	47976000	23605000
sp|P56182|RRP1_HUMAN	sp|P56182|RRP1_HUMAN	sp|P56182|RRP1_HUMAN Ribosomal RNA processing protein 1 homolog A OS=Homo sapiens OX=9606 GN=RRP1 PE=1 SV=1	4	4	2	2	3	11.3	7.8097	0.81026	0.71213	49.885	0.92495	0.70652	1.2032	0.93246	0.79068	1.2409	61895000	26743000	35152000	18982000	9439400	9542600	13190000	7382800	5806800	29724000	9921200	19802000
sp|Q9Y4Y9|LSM5_HUMAN	sp|Q9Y4Y9|LSM5_HUMAN	sp|Q9Y4Y9|LSM5_HUMAN U6 snRNA-associated Sm-like protein LSm5 OS=Homo sapiens OX=9606 GN=LSM5 PE=1 SV=3	1	1	1	1	1	20.9	18.068	0.76777	0.71267	10.843	0.76224	0.78648	0.73374	0.70408	0.82441	0.662	323140000	183560000	139580000	109230000	62218000	47009000	125090000	71389000	53697000	88828000	49952000	38876000
sp|Q15758|AAAT_HUMAN;sp|Q15758-3|AAAT_HUMAN;sp|Q15758-2|AAAT_HUMAN	sp|Q15758|AAAT_HUMAN;sp|Q15758-3|AAAT_HUMAN;sp|Q15758-2|AAAT_HUMAN	sp|Q15758|AAAT_HUMAN Neutral amino acid transporter B(0) OS=Homo sapiens OX=9606 GN=SLC1A5 PE=1 SV=2;sp|Q15758-3|AAAT_HUMAN Isoform 3 of Neutral amino acid transporter B(0) OS=Homo sapiens OX=9606 GN=SLC1A5;sp|Q15758-2|AAAT_HUMAN Isoform 2 of Neutral amino	6	6	4	5	5	16.1	56.72	0.69376	0.71302	35.246	0.69277	0.72808	0.73227	0.64323	0.77745	0.7066	803430000	455110000	348310000	209700000	111610000	98090000	297350000	171220000	126130000	296370000	172280000	124090000
sp|Q5VT66-3|MARC1_HUMAN;sp|Q5VT66|MARC1_HUMAN;sp|Q5VT66-2|MARC1_HUMAN	sp|Q5VT66-3|MARC1_HUMAN;sp|Q5VT66|MARC1_HUMAN;sp|Q5VT66-2|MARC1_HUMAN	sp|Q5VT66-3|MARC1_HUMAN Isoform 3 of Mitochondrial amidoxime-reducing component 1 OS=Homo sapiens OX=9606 GN=MTARC1;sp|Q5VT66|MARC1_HUMAN Mitochondrial amidoxime-reducing component 1 OS=Homo sapiens OX=9606 GN=MTARC1 PE=1 SV=1;sp|Q5VT66-2|MARC1_HUMAN Isofo	1	1	1	1	1	6.7	6.9726	0.72706	0.71348	10.886	0.6663	0.7524	0.74	0.63348	0.82089	0.71348	83546000	50094000	33452000	31566000	20361000	11205000	31613000	18383000	13230000	20367000	11350000	9016200
sp|P08195-2|4F2_HUMAN;sp|P08195-3|4F2_HUMAN;sp|P08195|4F2_HUMAN;sp|P08195-5|4F2_HUMAN;sp|P08195-4|4F2_HUMAN	sp|P08195-2|4F2_HUMAN;sp|P08195-3|4F2_HUMAN;sp|P08195|4F2_HUMAN;sp|P08195-5|4F2_HUMAN;sp|P08195-4|4F2_HUMAN	sp|P08195-2|4F2_HUMAN Isoform 2 of 4F2 cell-surface antigen heavy chain OS=Homo sapiens OX=9606 GN=SLC3A2;sp|P08195-3|4F2_HUMAN Isoform 3 of 4F2 cell-surface antigen heavy chain OS=Homo sapiens OX=9606 GN=SLC3A2;sp|P08195|4F2_HUMAN 4F2 cell-surface antigen	12	12	9	10	11	29.9	67.148	0.75209	0.71368	31.691	0.79538	0.69347	0.75209	0.72605	0.74618	0.69658	1223600000	682260000	541310000	425590000	233880000	191710000	419190000	240030000	179160000	378790000	208340000	170440000
sp|Q9NWY4|HPF1_HUMAN;sp|A8MVJ9|HPF1L_HUMAN	sp|Q9NWY4|HPF1_HUMAN;sp|A8MVJ9|HPF1L_HUMAN	sp|Q9NWY4|HPF1_HUMAN Histone PARylation factor 1 OS=Homo sapiens OX=9606 GN=HPF1 PE=1 SV=2;sp|A8MVJ9|HPF1L_HUMAN Putative histone PARylation factor 1-like OS=Homo sapiens OX=9606 PE=5 SV=1	2	2	1	1	0	8.4	2.4934	0.66046	0.71432	8.1631	NaN	0.66046	NaN	NaN	0.71432	NaN	9079100	6078100	3001000	2461200	2461200	0	6617900	3616900	3001000	0	0	0
sp|Q9UHW5|GPN3_HUMAN;sp|Q9UHW5-2|GPN3_HUMAN;sp|Q9UHW5-3|GPN3_HUMAN	sp|Q9UHW5|GPN3_HUMAN;sp|Q9UHW5-2|GPN3_HUMAN;sp|Q9UHW5-3|GPN3_HUMAN	sp|Q9UHW5|GPN3_HUMAN GPN-loop GTPase 3 OS=Homo sapiens OX=9606 GN=GPN3 PE=1 SV=2;sp|Q9UHW5-2|GPN3_HUMAN Isoform 2 of GPN-loop GTPase 3 OS=Homo sapiens OX=9606 GN=GPN3;sp|Q9UHW5-3|GPN3_HUMAN Isoform 3 of GPN-loop GTPase 3 OS=Homo sapiens OX=9606 GN=GPN3	2	2	0	2	1	14.4	7.6039	0.70367	0.71456	10.44	NaN	0.74026	NaN	NaN	0.7693	NaN	40345000	21382000	18963000	0	0	0	20480000	10710000	9770500	19865000	10672000	9192700
sp|Q86UK7-2|ZN598_HUMAN;sp|Q86UK7-3|ZN598_HUMAN;sp|Q86UK7|ZN598_HUMAN;sp|Q86UK7-4|ZN598_HUMAN	sp|Q86UK7-2|ZN598_HUMAN;sp|Q86UK7-3|ZN598_HUMAN;sp|Q86UK7|ZN598_HUMAN;sp|Q86UK7-4|ZN598_HUMAN	sp|Q86UK7-2|ZN598_HUMAN Isoform 2 of E3 ubiquitin-protein ligase ZNF598 OS=Homo sapiens OX=9606 GN=ZNF598;sp|Q86UK7-3|ZN598_HUMAN Isoform 3 of E3 ubiquitin-protein ligase ZNF598 OS=Homo sapiens OX=9606 GN=ZNF598;sp|Q86UK7|ZN598_HUMAN E3 ubiquitin-protein l	2	2	1	0	2	3.7	2.2379	0.6374	0.71582	36.468	NaN	NaN	0.90887	NaN	NaN	0.85854	13256000	6614100	6641900	4363800	2126200	2237600	0	0	0	8892100	4487900	4404200
sp|Q9UKA9|PTBP2_HUMAN;sp|Q9UKA9-2|PTBP2_HUMAN;sp|Q9UKA9-4|PTBP2_HUMAN;sp|Q9UKA9-3|PTBP2_HUMAN;sp|Q9UKA9-5|PTBP2_HUMAN;sp|Q9UKA9-6|PTBP2_HUMAN	sp|Q9UKA9|PTBP2_HUMAN;sp|Q9UKA9-2|PTBP2_HUMAN;sp|Q9UKA9-4|PTBP2_HUMAN;sp|Q9UKA9-3|PTBP2_HUMAN;sp|Q9UKA9-5|PTBP2_HUMAN;sp|Q9UKA9-6|PTBP2_HUMAN	sp|Q9UKA9|PTBP2_HUMAN Polypyrimidine tract-binding protein 2 OS=Homo sapiens OX=9606 GN=PTBP2 PE=1 SV=1;sp|Q9UKA9-2|PTBP2_HUMAN Isoform 2 of Polypyrimidine tract-binding protein 2 OS=Homo sapiens OX=9606 GN=PTBP2;sp|Q9UKA9-4|PTBP2_HUMAN Isoform 4 of Polypy	3	3	2	1	2	8.1	7.8365	0.73127	0.71616	8.163	0.63023	0.73774	0.71988	0.67315	0.81709	0.72124	60699000	31638000	29061000	15288000	7445000	7843300	25756000	14808000	10949000	19654000	9385100	10269000
sp|O00762-2|UBE2C_HUMAN;sp|O00762|UBE2C_HUMAN;sp|O00762-3|UBE2C_HUMAN	sp|O00762-2|UBE2C_HUMAN;sp|O00762|UBE2C_HUMAN;sp|O00762-3|UBE2C_HUMAN	sp|O00762-2|UBE2C_HUMAN Isoform 2 of Ubiquitin-conjugating enzyme E2 C OS=Homo sapiens OX=9606 GN=UBE2C;sp|O00762|UBE2C_HUMAN Ubiquitin-conjugating enzyme E2 C OS=Homo sapiens OX=9606 GN=UBE2C PE=1 SV=1;sp|O00762-3|UBE2C_HUMAN Isoform 3 of Ubiquitin-conjug	2	2	2	2	2	24.3	11.899	0.74396	0.71645	28.33	0.63758	0.71385	0.76704	0.55281	0.75452	0.72585	160820000	89414000	71402000	47090000	26404000	20686000	61976000	36139000	25837000	51749000	26871000	24878000
sp|P10768|ESTD_HUMAN	sp|P10768|ESTD_HUMAN	sp|P10768|ESTD_HUMAN S-formylglutathione hydrolase OS=Homo sapiens OX=9606 GN=ESD PE=1 SV=2	9	9	8	9	8	53.9	61.889	0.76708	0.71664	29.054	0.88815	0.81034	0.91844	0.81542	0.86329	0.87977	2356200000	1183000000	1173200000	738110000	348980000	389130000	865470000	463150000	402320000	752650000	370880000	381770000
sp|Q8NB90-2|SPAT5_HUMAN;sp|Q8NB90|SPAT5_HUMAN	sp|Q8NB90-2|SPAT5_HUMAN;sp|Q8NB90|SPAT5_HUMAN	sp|Q8NB90-2|SPAT5_HUMAN Isoform 2 of Ribosome biogenesis protein SPATA5 OS=Homo sapiens OX=9606 GN=SPATA5;sp|Q8NB90|SPAT5_HUMAN Ribosome biogenesis protein SPATA5 OS=Homo sapiens OX=9606 GN=SPATA5 PE=1 SV=3	1	1	1	1	1	3.9	8.8854	0.75791	0.71751	19.307	0.56415	0.77117	0.75791	0.54991	0.84372	0.71751	69461000	40414000	29048000	19954000	12795000	7159300	30029000	16460000	13570000	19478000	11159000	8318600
sp|Q06323|PSME1_HUMAN;sp|Q06323-3|PSME1_HUMAN;sp|Q06323-2|PSME1_HUMAN	sp|Q06323|PSME1_HUMAN;sp|Q06323-3|PSME1_HUMAN;sp|Q06323-2|PSME1_HUMAN	sp|Q06323|PSME1_HUMAN Proteasome activator complex subunit 1 OS=Homo sapiens OX=9606 GN=PSME1 PE=1 SV=1;sp|Q06323-3|PSME1_HUMAN Isoform 3 of Proteasome activator complex subunit 1 OS=Homo sapiens OX=9606 GN=PSME1;sp|Q06323-2|PSME1_HUMAN Isoform 2 of Protea	4	4	2	4	3	19.3	10.944	0.69315	0.71774	31.707	0.97625	0.69359	0.88852	0.96616	0.74098	0.8845	236790000	121360000	115430000	46038000	18787000	27250000	116130000	65327000	50806000	74618000	37242000	37376000
sp|P51116|FXR2_HUMAN	sp|P51116|FXR2_HUMAN	sp|P51116|FXR2_HUMAN RNA-binding protein FXR2 OS=Homo sapiens OX=9606 GN=FXR2 PE=1 SV=2	2	2	1	2	1	5.8	10.14	0.7462	0.71782	5.7737	0.7904	0.73341	0.74018	0.72787	0.78286	0.68886	114070000	63927000	50146000	25494000	14078000	11416000	45119000	27474000	17645000	43459000	22374000	21085000
sp|P46821|MAP1B_HUMAN;sp|P78559|MAP1A_HUMAN;sp|P78559-2|MAP1A_HUMAN	sp|P46821|MAP1B_HUMAN;sp|P78559|MAP1A_HUMAN;sp|P78559-2|MAP1A_HUMAN	sp|P46821|MAP1B_HUMAN Microtubule-associated protein 1B OS=Homo sapiens OX=9606 GN=MAP1B PE=1 SV=2;sp|P78559|MAP1A_HUMAN Microtubule-associated protein 1A OS=Homo sapiens OX=9606 GN=MAP1A PE=1 SV=6;sp|P78559-2|MAP1A_HUMAN Isoform 2 of Microtubule-associate	2	2	2	2	1	1.2	4.2859	0.66412	0.71834	38.095	0.92523	0.62139	0.51805	1.029	0.67842	0.53353	43850000	27320000	16530000	15660000	9498800	6161100	17120000	10504000	6616100	11070000	7316500	3753000
sp|Q9Y281-3|COF2_HUMAN;sp|Q9Y281|COF2_HUMAN	sp|Q9Y281-3|COF2_HUMAN;sp|Q9Y281|COF2_HUMAN	sp|Q9Y281-3|COF2_HUMAN Isoform 3 of Cofilin-2 OS=Homo sapiens OX=9606 GN=CFL2;sp|Q9Y281|COF2_HUMAN Cofilin-2 OS=Homo sapiens OX=9606 GN=CFL2 PE=1 SV=1	5	5	5	3	4	52.3	23.124	0.79531	0.71893	31.324	0.77775	0.70753	0.71743	0.70612	0.74425	0.64939	681200000	372210000	308990000	278970000	148040000	130930000	193680000	105560000	88114000	208550000	118600000	89945000
sp|Q6PKG0|LARP1_HUMAN;sp|Q6PKG0-3|LARP1_HUMAN	sp|Q6PKG0|LARP1_HUMAN;sp|Q6PKG0-3|LARP1_HUMAN	sp|Q6PKG0|LARP1_HUMAN La-related protein 1 OS=Homo sapiens OX=9606 GN=LARP1 PE=1 SV=2;sp|Q6PKG0-3|LARP1_HUMAN Isoform 2 of La-related protein 1 OS=Homo sapiens OX=9606 GN=LARP1	8	8	6	5	2	11.5	20.244	0.76457	0.71954	41.242	0.63662	0.82957	0.77757	0.61136	0.86634	0.72535	234310000	119220000	115100000	103850000	56560000	47293000	71438000	35778000	35660000	59021000	26877000	32143000
sp|A6NDU8|RIMC1_HUMAN	sp|A6NDU8|RIMC1_HUMAN	sp|A6NDU8|RIMC1_HUMAN RAB7A-interacting MON1-CCZ1 complex subunit 1 OS=Homo sapiens OX=9606 GN=RIMOC1 PE=1 SV=1	1	1	1	1	1	4.8	2.2627	0.69251	0.72128	11.905	NaN	0.7723	0.68125	NaN	0.84181	0.68089	51466000	33993000	17472000	14203000	11537000	2666400	15774000	10215000	5558600	21489000	12241000	9247200
sp|P07437|TBB5_HUMAN	sp|P07437|TBB5_HUMAN	sp|P07437|TBB5_HUMAN Tubulin beta chain OS=Homo sapiens OX=9606 GN=TUBB PE=1 SV=2	6	5	5	6	6	60.6	323.31	0.77571	0.72147	30.897	0.73878	0.79887	0.77517	0.68363	0.81441	0.70987	23019000000	11168000000	11852000000	6627200000	3105900000	3521300000	8199000000	4173700000	4025200000	8193200000	3888200000	4305100000
sp|Q96EY8|MMAB_HUMAN	sp|Q96EY8|MMAB_HUMAN	sp|Q96EY8|MMAB_HUMAN Corrinoid adenosyltransferase MMAB OS=Homo sapiens OX=9606 GN=MMAB PE=1 SV=1	3	3	3	1	3	19.6	7.564	0.75335	0.72427	5.0643	0.791	NaN	0.71452	0.75165	NaN	0.68463	81619000	50233000	31386000	35591000	23687000	11904000	20408000	14534000	5873200	25621000	12012000	13610000
sp|P04818|TYSY_HUMAN;sp|P04818-2|TYSY_HUMAN;sp|P04818-3|TYSY_HUMAN	sp|P04818|TYSY_HUMAN;sp|P04818-2|TYSY_HUMAN	sp|P04818|TYSY_HUMAN Thymidylate synthase OS=Homo sapiens OX=9606 GN=TYMS PE=1 SV=3;sp|P04818-2|TYSY_HUMAN Isoform 2 of Thymidylate synthase OS=Homo sapiens OX=9606 GN=TYMS	5	5	3	5	3	24.9	15.776	0.72005	0.72431	45.595	0.9559	0.76587	1.0539	0.87981	0.81143	0.99619	209740000	133560000	76175000	57473000	36816000	20658000	90473000	59983000	30490000	61793000	36766000	25027000
sp|Q9UQ05|KCNH4_HUMAN	sp|Q9UQ05|KCNH4_HUMAN	sp|Q9UQ05|KCNH4_HUMAN Potassium voltage-gated channel subfamily H member 4 OS=Homo sapiens OX=9606 GN=KCNH4 PE=2 SV=1	2	2	0	0	2	2.4	2.1189	0.80304	0.72463	50.873	NaN	NaN	0.80304	NaN	NaN	0.72463	210320000	104600000	105710000	0	0	0	0	0	0	210320000	104600000	105710000
sp|Q6PGP7|SKI3_HUMAN	sp|Q6PGP7|SKI3_HUMAN	sp|Q6PGP7|SKI3_HUMAN SKI3 subunit of superkiller complex protein OS=Homo sapiens OX=9606 GN=SKIC3 PE=1 SV=1	1	1	1	1	1	1.2	2.208	0.68787	0.72471	13.386	0.73636	0.69721	0.67206	0.78757	0.76208	0.67349	45659000	26327000	19331000	12370000	6737000	5632600	17173000	10163000	7010500	16115000	9427400	6688000
sp|Q99956|DUS9_HUMAN;sp|Q16828-2|DUS6_HUMAN;sp|Q16829-2|DUS7_HUMAN;sp|Q16828|DUS6_HUMAN;sp|Q16829|DUS7_HUMAN	sp|Q99956|DUS9_HUMAN;sp|Q16828-2|DUS6_HUMAN;sp|Q16829-2|DUS7_HUMAN;sp|Q16828|DUS6_HUMAN;sp|Q16829|DUS7_HUMAN	sp|Q99956|DUS9_HUMAN Dual specificity protein phosphatase 9 OS=Homo sapiens OX=9606 GN=DUSP9 PE=1 SV=1;sp|Q16828-2|DUS6_HUMAN Isoform 2 of Dual specificity protein phosphatase 6 OS=Homo sapiens OX=9606 GN=DUSP6;sp|Q16829-2|DUS7_HUMAN Isoform 2 of Dual spec	2	2	2	1	1	8.1	5.5319	0.73175	0.72522	13.319	NaN	NaN	NaN	NaN	NaN	NaN	31119000	24793000	6325700	5631400	5631400	0	11111000	7689500	3421800	14376000	11472000	2903900
sp|Q16740|CLPP_HUMAN	sp|Q16740|CLPP_HUMAN	sp|Q16740|CLPP_HUMAN ATP-dependent Clp protease proteolytic subunit, mitochondrial OS=Homo sapiens OX=9606 GN=CLPP PE=1 SV=1	3	3	1	2	3	17.3	12.642	0.68772	0.72585	34.526	NaN	0.68899	NaN	NaN	0.7281	NaN	206620000	126840000	79773000	49763000	40724000	9038200	86063000	52129000	33934000	70790000	33989000	36801000
sp|Q8NF37|PCAT1_HUMAN	sp|Q8NF37|PCAT1_HUMAN	sp|Q8NF37|PCAT1_HUMAN Lysophosphatidylcholine acyltransferase 1 OS=Homo sapiens OX=9606 GN=LPCAT1 PE=1 SV=2	2	2	2	2	2	5.1	8.7879	0.72319	0.72613	13.609	0.73721	0.70217	0.73458	0.71599	0.75331	0.71581	106420000	59408000	47007000	26436000	14574000	11861000	51162000	28648000	22515000	28817000	16186000	12631000
sp|A6NHR9|SMHD1_HUMAN;sp|A6NHR9-2|SMHD1_HUMAN;sp|A6NHR9-3|SMHD1_HUMAN	sp|A6NHR9|SMHD1_HUMAN;sp|A6NHR9-2|SMHD1_HUMAN;sp|A6NHR9-3|SMHD1_HUMAN	sp|A6NHR9|SMHD1_HUMAN Structural maintenance of chromosomes flexible hinge domain-containing protein 1 OS=Homo sapiens OX=9606 GN=SMCHD1 PE=1 SV=2;sp|A6NHR9-2|SMHD1_HUMAN Isoform 2 of Structural maintenance of chromosomes flexible hinge domain-containing p	4	4	2	3	2	2.2	8.6503	0.67747	0.72695	24.539	0.80842	0.58967	0.66778	0.8774	0.65391	0.68169	59452000	31540000	27912000	14057000	6566300	7490600	28203000	15718000	12485000	17193000	9255900	7936600
sp|Q6UX04-2|CWC27_HUMAN;sp|Q6UX04|CWC27_HUMAN	sp|Q6UX04-2|CWC27_HUMAN;sp|Q6UX04|CWC27_HUMAN	sp|Q6UX04-2|CWC27_HUMAN Isoform 2 of Spliceosome-associated protein CWC27 homolog OS=Homo sapiens OX=9606 GN=CWC27;sp|Q6UX04|CWC27_HUMAN Spliceosome-associated protein CWC27 homolog OS=Homo sapiens OX=9606 GN=CWC27 PE=1 SV=1	2	2	2	2	2	9	10.642	0.73113	0.72738	12.077	0.70658	0.80216	0.73454	0.70457	0.85902	0.71301	88289000	50413000	37877000	30161000	17696000	12465000	25609000	14179000	11430000	32520000	18538000	13982000
sp|Q9BRG1|VPS25_HUMAN	sp|Q9BRG1|VPS25_HUMAN	sp|Q9BRG1|VPS25_HUMAN Vacuolar protein-sorting-associated protein 25 OS=Homo sapiens OX=9606 GN=VPS25 PE=1 SV=1	1	1	1	1	1	8.5	4.1032	0.69698	0.72746	5.9928	NaN	0.70296	0.68131	NaN	0.7728	0.70096	37097000	21551000	15546000	3273100	3273100	0	14932000	7940200	6991400	18892000	10337000	8554600
sp|O14802|RPC1_HUMAN	sp|O14802|RPC1_HUMAN	sp|O14802|RPC1_HUMAN DNA-directed RNA polymerase III subunit RPC1 OS=Homo sapiens OX=9606 GN=POLR3A PE=1 SV=2	4	4	1	2	2	5.3	3.8324	0.71268	0.72831	16.501	NaN	NaN	NaN	NaN	NaN	NaN	20230000	3574600	16656000	3132000	1471500	1660400	10445000	0	10445000	6653600	2103000	4550600
sp|P31350|RIR2_HUMAN;sp|P31350-2|RIR2_HUMAN	sp|P31350|RIR2_HUMAN;sp|P31350-2|RIR2_HUMAN	sp|P31350|RIR2_HUMAN Ribonucleoside-diphosphate reductase subunit M2 OS=Homo sapiens OX=9606 GN=RRM2 PE=1 SV=1;sp|P31350-2|RIR2_HUMAN Isoform 2 of Ribonucleoside-diphosphate reductase subunit M2 OS=Homo sapiens OX=9606 GN=RRM2	2	2	1	2	2	6.7	5.8559	0.75996	0.72845	40.143	NaN	NaN	0.8181	NaN	NaN	0.75214	63092000	32903000	30189000	12228000	6405800	5821800	21362000	9715700	11646000	29502000	16782000	12721000
sp|Q86TU7|SETD3_HUMAN;sp|Q86TU7-3|SETD3_HUMAN;sp|Q86TU7-2|SETD3_HUMAN	sp|Q86TU7|SETD3_HUMAN;sp|Q86TU7-3|SETD3_HUMAN;sp|Q86TU7-2|SETD3_HUMAN	sp|Q86TU7|SETD3_HUMAN Actin-histidine N-methyltransferase OS=Homo sapiens OX=9606 GN=SETD3 PE=1 SV=1;sp|Q86TU7-3|SETD3_HUMAN Isoform 3 of Actin-histidine N-methyltransferase OS=Homo sapiens OX=9606 GN=SETD3;sp|Q86TU7-2|SETD3_HUMAN Isoform 2 of Actin-histid	3	3	2	1	3	6.7	9.7366	0.71552	0.72865	40.97	0.927	0.89198	0.94129	0.97919	0.9777	0.93848	70079000	41545000	28534000	28527000	16843000	11683000	15007000	8043800	6963300	26545000	16658000	9887100
sp|Q14676-3|MDC1_HUMAN;sp|Q14676-2|MDC1_HUMAN;sp|Q14676|MDC1_HUMAN;sp|Q14676-4|MDC1_HUMAN	sp|Q14676-3|MDC1_HUMAN;sp|Q14676-2|MDC1_HUMAN;sp|Q14676|MDC1_HUMAN;sp|Q14676-4|MDC1_HUMAN	sp|Q14676-3|MDC1_HUMAN Isoform 3 of Mediator of DNA damage checkpoint protein 1 OS=Homo sapiens OX=9606 GN=MDC1;sp|Q14676-2|MDC1_HUMAN Isoform 2 of Mediator of DNA damage checkpoint protein 1 OS=Homo sapiens OX=9606 GN=MDC1;sp|Q14676|MDC1_HUMAN Mediator of	8	8	4	7	3	9.2	15.823	0.68811	0.73	24.429	0.36529	0.59649	0.56828	0.38256	0.6475	0.56366	111410000	75884000	35528000	34258000	24333000	9924900	53335000	35400000	17935000	23819000	16151000	7667800
sp|P13995|MTDC_HUMAN;sp|P13995-2|MTDC_HUMAN	sp|P13995|MTDC_HUMAN;sp|P13995-2|MTDC_HUMAN	sp|P13995|MTDC_HUMAN Bifunctional methylenetetrahydrofolate dehydrogenase/cyclohydrolase, mitochondrial OS=Homo sapiens OX=9606 GN=MTHFD2 PE=1 SV=2;sp|P13995-2|MTDC_HUMAN Isoform 2 of Bifunctional methylenetetrahydrofolate dehydrogenase/cyclohydrolase, mit	4	4	3	4	3	14.9	17.686	0.76404	0.73021	29.756	0.77888	0.62255	0.76532	0.77304	0.6764	0.7006	557570000	318530000	239040000	176940000	94088000	82855000	213260000	130180000	83076000	167370000	94262000	73105000
sp|P42696-2|RBM34_HUMAN;sp|P42696|RBM34_HUMAN	sp|P42696-2|RBM34_HUMAN;sp|P42696|RBM34_HUMAN	sp|P42696-2|RBM34_HUMAN Isoform 2 of RNA-binding protein 34 OS=Homo sapiens OX=9606 GN=RBM34;sp|P42696|RBM34_HUMAN RNA-binding protein 34 OS=Homo sapiens OX=9606 GN=RBM34 PE=1 SV=2	2	2	1	2	0	15.1	5.219	0.673	0.73056	19.657	NaN	0.673	NaN	NaN	0.73056	NaN	34173000	14382000	19791000	5200700	0	5200700	28973000	14382000	14591000	0	0	0
sp|P41223|BUD31_HUMAN;sp|P41223-2|BUD31_HUMAN	sp|P41223|BUD31_HUMAN;sp|P41223-2|BUD31_HUMAN	sp|P41223|BUD31_HUMAN Protein BUD31 homolog OS=Homo sapiens OX=9606 GN=BUD31 PE=1 SV=2;sp|P41223-2|BUD31_HUMAN Isoform 2 of Protein BUD31 homolog OS=Homo sapiens OX=9606 GN=BUD31	3	3	2	3	3	25	7.5906	0.69658	0.73098	33.748	0.5967	0.69658	0.77497	0.54876	0.74217	0.76677	213240000	132020000	81211000	74793000	47934000	26859000	83044000	51173000	31871000	55398000	32917000	22482000
sp|O95376|ARI2_HUMAN	sp|O95376|ARI2_HUMAN	sp|O95376|ARI2_HUMAN E3 ubiquitin-protein ligase ARIH2 OS=Homo sapiens OX=9606 GN=ARIH2 PE=1 SV=1	2	2	1	2	1	6.7	5.9901	0.7078	0.73177	44.254	0.49824	0.71148	0.55515	0.48217	0.77959	0.53514	96787000	64699000	32088000	30228000	20997000	9230500	38098000	23475000	14623000	28461000	20227000	8234200
sp|Q13541|4EBP1_HUMAN	sp|Q13541|4EBP1_HUMAN	sp|Q13541|4EBP1_HUMAN Eukaryotic translation initiation factor 4E-binding protein 1 OS=Homo sapiens OX=9606 GN=EIF4EBP1 PE=1 SV=3	4	4	3	2	3	70.3	9.9282	0.78343	0.73196	2.3689	0.84643	0.57713	0.78547	0.78636	0.61386	0.74013	522200000	301300000	220900000	183720000	97740000	85980000	171610000	102060000	69547000	166870000	101500000	65371000
sp|P25440|BRD2_HUMAN;sp|P25440-2|BRD2_HUMAN;sp|P25440-4|BRD2_HUMAN;sp|P25440-3|BRD2_HUMAN	sp|P25440|BRD2_HUMAN;sp|P25440-2|BRD2_HUMAN;sp|P25440-4|BRD2_HUMAN;sp|P25440-3|BRD2_HUMAN	sp|P25440|BRD2_HUMAN Bromodomain-containing protein 2 OS=Homo sapiens OX=9606 GN=BRD2 PE=1 SV=2;sp|P25440-2|BRD2_HUMAN Isoform 2 of Bromodomain-containing protein 2 OS=Homo sapiens OX=9606 GN=BRD2;sp|P25440-4|BRD2_HUMAN Isoform 4 of Bromodomain-containing	5	5	5	2	1	11.1	9.3638	0.72872	0.73229	49.115	0.7526	0.58254	NaN	0.74498	0.62377	NaN	120990000	81326000	39660000	78261000	48029000	30232000	33283000	23855000	9428300	9443100	9443100	0
sp|Q96K17|BT3L4_HUMAN;sp|Q96K17-2|BT3L4_HUMAN	sp|Q96K17|BT3L4_HUMAN;sp|Q96K17-2|BT3L4_HUMAN	sp|Q96K17|BT3L4_HUMAN Transcription factor BTF3 homolog 4 OS=Homo sapiens OX=9606 GN=BTF3L4 PE=1 SV=1;sp|Q96K17-2|BT3L4_HUMAN Isoform 2 of Transcription factor BTF3 homolog 4 OS=Homo sapiens OX=9606 GN=BTF3L4	4	4	4	2	4	48.7	35.562	0.71717	0.73284	21.552	0.9818	0.8382	0.72594	0.89025	0.87632	0.69152	719620000	374570000	345050000	232890000	135610000	97283000	247170000	129710000	117460000	239560000	109250000	130300000
sp|Q9UK61-2|TASOR_HUMAN;sp|Q9UK61-3|TASOR_HUMAN;sp|Q9UK61-4|TASOR_HUMAN;sp|Q9UK61|TASOR_HUMAN	sp|Q9UK61-2|TASOR_HUMAN;sp|Q9UK61-3|TASOR_HUMAN;sp|Q9UK61-4|TASOR_HUMAN;sp|Q9UK61|TASOR_HUMAN	sp|Q9UK61-2|TASOR_HUMAN Isoform 2 of Protein TASOR OS=Homo sapiens OX=9606 GN=TASOR;sp|Q9UK61-3|TASOR_HUMAN Isoform 3 of Protein TASOR OS=Homo sapiens OX=9606 GN=TASOR;sp|Q9UK61-4|TASOR_HUMAN Isoform 4 of Protein TASOR OS=Homo sapiens OX=9606 GN=TASOR;sp|Q	1	1	1	0	1	1.2	4.0364	0.64922	0.73298	4.7719	0.64909	NaN	0.7483	0.7061	NaN	0.77265	24066000	15416000	8650000	13305000	8111000	5194200	0	0	0	10761000	7305100	3455800
sp|Q00577|PURA_HUMAN	sp|Q00577|PURA_HUMAN	sp|Q00577|PURA_HUMAN Transcriptional activator protein Pur-alpha OS=Homo sapiens OX=9606 GN=PURA PE=1 SV=2	2	2	2	1	1	14.9	5.1121	0.72524	0.73303	7.0331	0.71131	0.73778	NaN	0.70293	0.78082	NaN	35197000	21967000	13230000	15575000	10342000	5233200	13343000	7987500	5355200	6278900	3636800	2642000
REV__sp|Q8WXX0|DYH7_HUMAN;sp|P09131-2|P3_HUMAN;sp|P09131|P3_HUMAN	REV__sp|Q8WXX0|DYH7_HUMAN	sp|Q8WXX0|DYH7_HUMAN Dynein axonemal heavy chain 7 OS=Homo sapiens OX=9606 GN=DNAH7 PE=1 SV=2	3	3	0	3	0	1.6	2.536	0.69484	0.73386	24.943	NaN	0.69484	NaN	NaN	0.73386	NaN	45066000	27655000	17411000	0	0	0	45066000	27655000	17411000	0	0	0
sp|Q96G61|NUD11_HUMAN;sp|Q8NFP7|NUD10_HUMAN	sp|Q96G61|NUD11_HUMAN;sp|Q8NFP7|NUD10_HUMAN	sp|Q96G61|NUD11_HUMAN Diphosphoinositol polyphosphate phosphohydrolase 3-beta OS=Homo sapiens OX=9606 GN=NUDT11 PE=1 SV=1;sp|Q8NFP7|NUD10_HUMAN Diphosphoinositol polyphosphate phosphohydrolase 3-alpha OS=Homo sapiens OX=9606 GN=NUDT10 PE=1 SV=1	1	1	1	1	1	12.2	9.1758	0.7646	0.73468	9.9481	0.7646	0.75234	0.85991	0.71141	0.82251	0.8268	104160000	56350000	47810000	35943000	19424000	16519000	35485000	19351000	16134000	32732000	17575000	15157000
sp|Q15404-2|RSU1_HUMAN;sp|Q15404|RSU1_HUMAN	sp|Q15404-2|RSU1_HUMAN;sp|Q15404|RSU1_HUMAN	sp|Q15404-2|RSU1_HUMAN Isoform 2 of Ras suppressor protein 1 OS=Homo sapiens OX=9606 GN=RSU1;sp|Q15404|RSU1_HUMAN Ras suppressor protein 1 OS=Homo sapiens OX=9606 GN=RSU1 PE=1 SV=3	4	4	3	2	2	29.5	4.5146	0.7016	0.73494	44.72	0.52702	0.70945	0.73812	0.57017	0.76143	0.73351	58390000	31820000	26569000	20705000	10375000	10330000	17355000	9686100	7668800	20330000	11760000	8570500
sp|Q14315-2|FLNC_HUMAN;sp|Q14315|FLNC_HUMAN	sp|Q14315-2|FLNC_HUMAN;sp|Q14315|FLNC_HUMAN	sp|Q14315-2|FLNC_HUMAN Isoform 2 of Filamin-C OS=Homo sapiens OX=9606 GN=FLNC;sp|Q14315|FLNC_HUMAN Filamin-C OS=Homo sapiens OX=9606 GN=FLNC PE=1 SV=3	5	5	4	3	2	6.5	6.3766	0.69812	0.73515	58.112	0.64307	0.70949	1.0225	0.71397	0.73515	0.96815	92467000	64208000	28259000	30633000	21533000	9100200	43597000	32396000	11201000	18237000	10279000	7957800
sp|Q9P1F3|ABRAL_HUMAN	sp|Q9P1F3|ABRAL_HUMAN	sp|Q9P1F3|ABRAL_HUMAN Costars family protein ABRACL OS=Homo sapiens OX=9606 GN=ABRACL PE=1 SV=1	3	3	3	2	3	46.9	19.847	0.83253	0.7352	27.844	0.79163	0.81886	0.83253	0.68672	0.86012	0.7352	1216800000	666600000	550190000	454980000	248010000	206970000	423710000	232480000	191230000	338100000	186110000	151990000
sp|P36507|MP2K2_HUMAN	sp|P36507|MP2K2_HUMAN	sp|P36507|MP2K2_HUMAN Dual specificity mitogen-activated protein kinase kinase 2 OS=Homo sapiens OX=9606 GN=MAP2K2 PE=1 SV=1	6	3	5	5	6	24	16.141	0.67977	0.73524	11.336	0.67977	0.6754	0.69088	0.68251	0.73594	0.70141	162170000	101700000	60472000	49665000	29848000	19816000	71176000	48621000	22555000	41333000	23233000	18100000
sp|O60216|RAD21_HUMAN;sp|Q9H4I0|RD21L_HUMAN	sp|O60216|RAD21_HUMAN;sp|Q9H4I0|RD21L_HUMAN	sp|O60216|RAD21_HUMAN Double-strand-break repair protein rad21 homolog OS=Homo sapiens OX=9606 GN=RAD21 PE=1 SV=2;sp|Q9H4I0|RD21L_HUMAN Double-strand-break repair protein rad21-like protein 1 OS=Homo sapiens OX=9606 GN=RAD21L1 PE=2 SV=3	2	2	1	1	1	4.4	4.1284	0.68443	0.73709	42.687	0.92382	NaN	NaN	1.0229	NaN	NaN	23972000	12993000	10979000	13422000	6921300	6500500	4841000	3082100	1758900	5709400	2990100	2719300
sp|O75506|HSBP1_HUMAN	sp|O75506|HSBP1_HUMAN	sp|O75506|HSBP1_HUMAN Heat shock factor-binding protein 1 OS=Homo sapiens OX=9606 GN=HSBP1 PE=1 SV=1	2	2	2	2	2	50	28.779	0.7201	0.73826	19.735	0.635	0.71631	0.80358	0.59188	0.75802	0.76906	397010000	225370000	171650000	117690000	67371000	50314000	124320000	71637000	52687000	155000000	86359000	68644000
sp|Q9H7Z7|PGES2_HUMAN	sp|Q9H7Z7|PGES2_HUMAN	sp|Q9H7Z7|PGES2_HUMAN Prostaglandin E synthase 2 OS=Homo sapiens OX=9606 GN=PTGES2 PE=1 SV=1	2	2	2	2	1	11.9	2.468	0.73793	0.73844	9.4709	0.72748	0.8185	0.74282	0.72915	0.88424	0.73241	65374000	39484000	25890000	22839000	14923000	7915100	16396000	9864500	6531500	26139000	14696000	11443000
sp|Q969Z0|FAKD4_HUMAN;sp|Q969Z0-2|FAKD4_HUMAN	sp|Q969Z0|FAKD4_HUMAN;sp|Q969Z0-2|FAKD4_HUMAN	sp|Q969Z0|FAKD4_HUMAN FAST kinase domain-containing protein 4 OS=Homo sapiens OX=9606 GN=TBRG4 PE=1 SV=1;sp|Q969Z0-2|FAKD4_HUMAN Isoform 2 of FAST kinase domain-containing protein 4 OS=Homo sapiens OX=9606 GN=TBRG4	4	4	3	3	2	9.8	8.7191	0.75209	0.73864	12.024	0.78923	0.75438	0.75108	0.7441	0.80907	0.7048	163560000	93712000	69851000	93611000	52577000	41034000	41251000	22204000	19047000	28702000	18931000	9771100
sp|Q13547|HDAC1_HUMAN	sp|Q13547|HDAC1_HUMAN	sp|Q13547|HDAC1_HUMAN Histone deacetylase 1 OS=Homo sapiens OX=9606 GN=HDAC1 PE=1 SV=1	3	3	1	3	1	21.4	6.8537	0.68965	0.7396	18.067	1.1024	0.68965	1.083	0.9971	0.7396	1.0079	145590000	71899000	73692000	35158000	17484000	17674000	64603000	34244000	30358000	45831000	20170000	25660000
[truncated: 2,487 more rows]

## Sheet: Table S7 
Ratio H/L normalized L4H4	Ratio H/L normalized L5H5	Ratio H/L normalized L6H6	N: Score	N: Intensity	N: Intensity L	N: Intensity H	N: -Log T-test p-value	N: T-test Difference	T: Protein IDs
-0.544687	-0.550275	-0.551987	25.866	657190000	360140000	297050000	4.79267	-0.548983	sp|O00767|SCD_HUMAN
[truncated: 1,886 more rows]

## Sheet: Table S8 
	Reference list		Negative responders		Positive responders
[truncated: 21 more rows]

## Sheet: Table S9
pos	A_neg	A_bg	A_pos	T_neg	T_bg	T_pos	G_neg	G_bg	G_pos	C_neg	C_bg	C_pos
[truncated: 40 more rows]

[truncated: 1 more sheets: Table S10]
