# Supplementary figures and images for: Insufficiency of 40S ribosomal proteins, RPS26 and RPS25, negatively affects biosynthesis of polyglycine-containing proteins in fragile-X associated conditions
Source: eLife journal article supplement (doi:10.7554/elife.98631), 2024-07-01

Images corresponding to **Figure 1:**

**
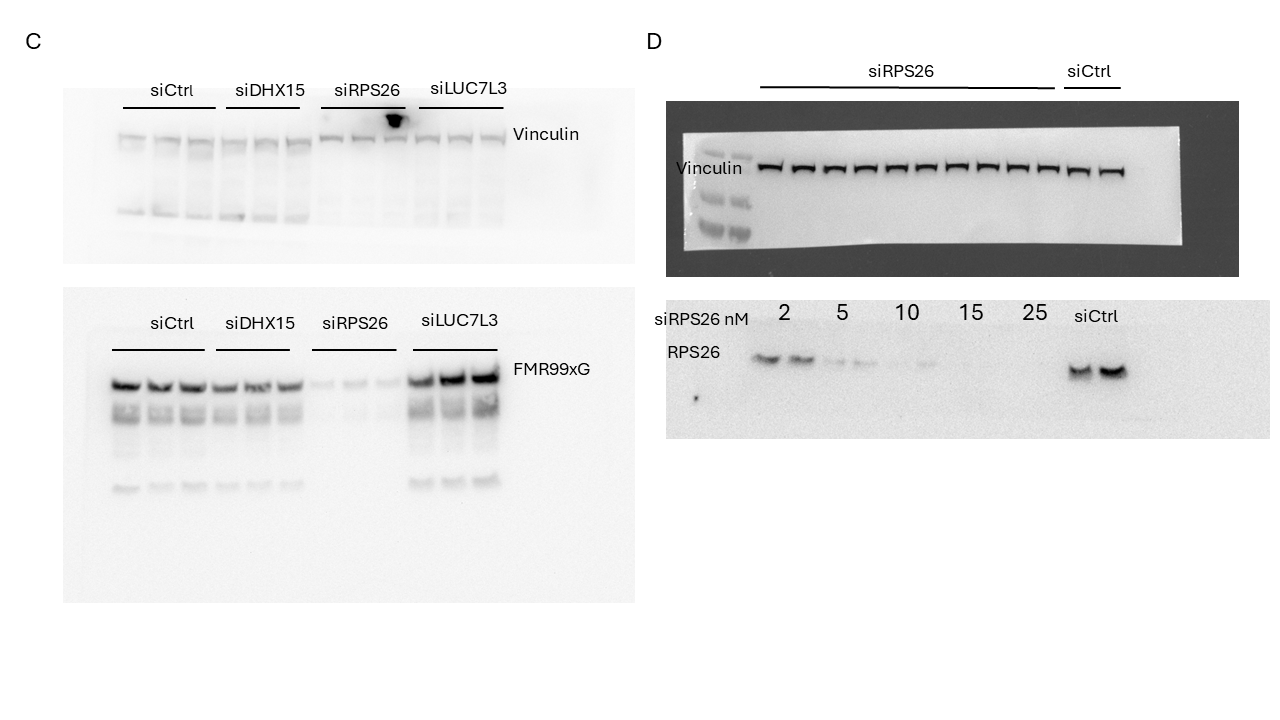
**

Supplement: fig1-data1 [file elife-98631-fig1-data1-v1.zip]

Images corresponding to **Figure 1 – figure supplement 1**:

B

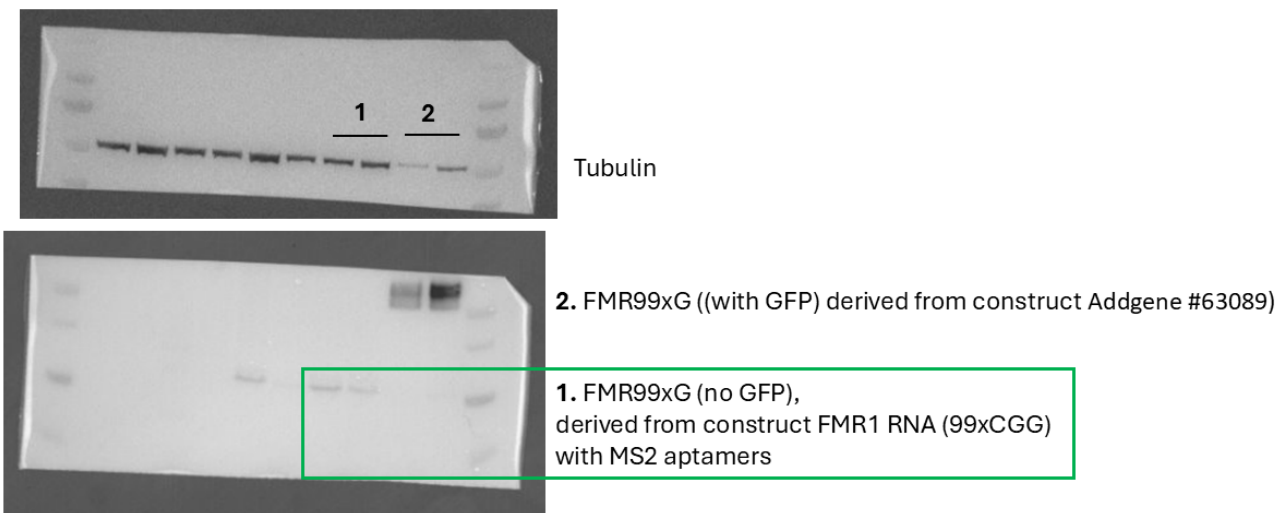

D

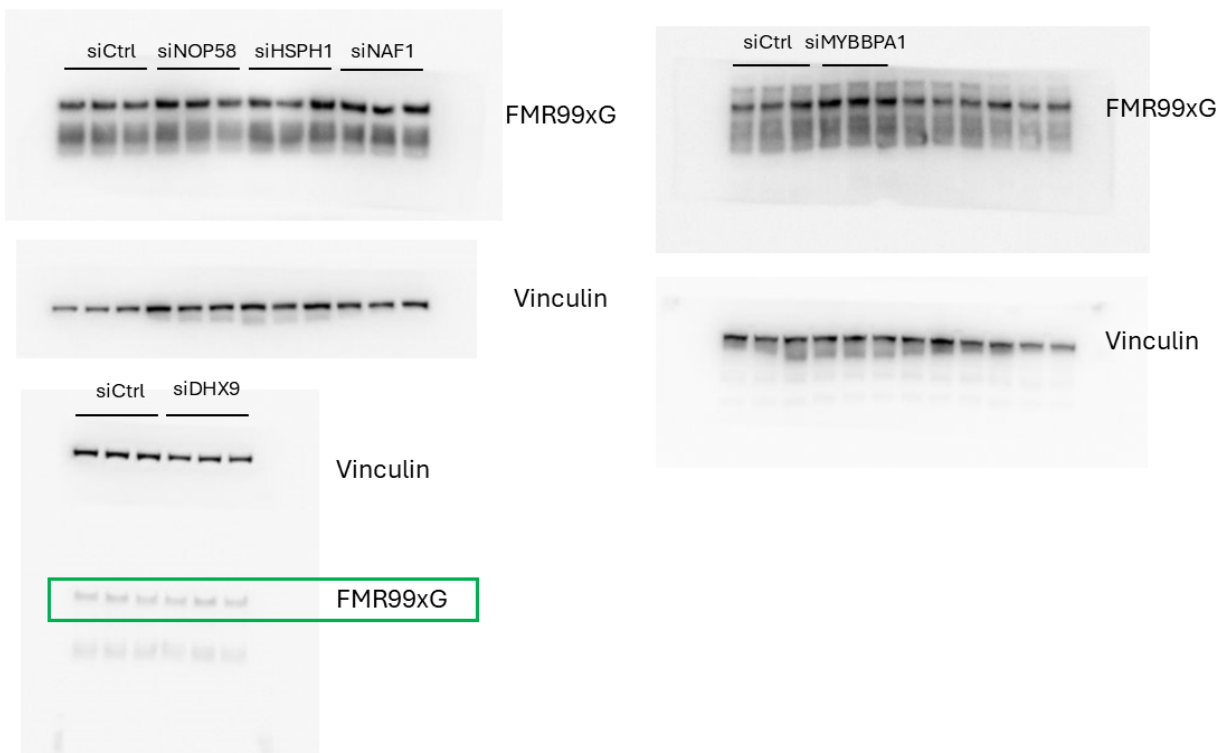

G

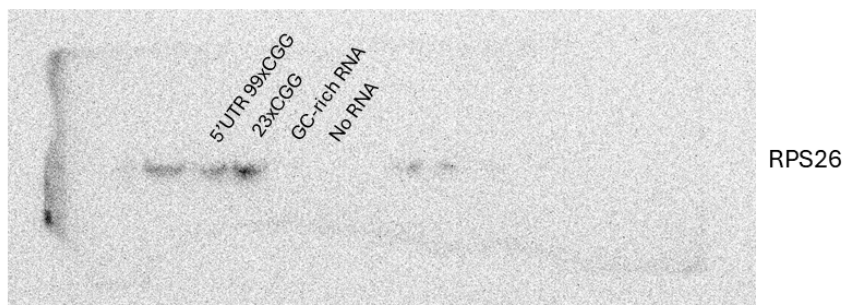

H

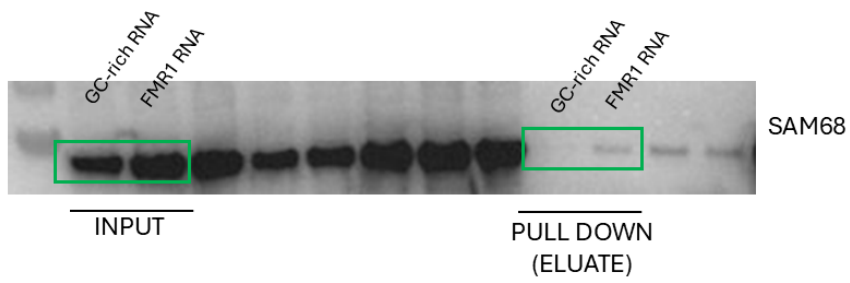

Supplement: fig1-figsupp1-data1 [file elife-98631-fig1-figsupp1-data1-v1.zip]

Images corresponding to **Figure 2**:

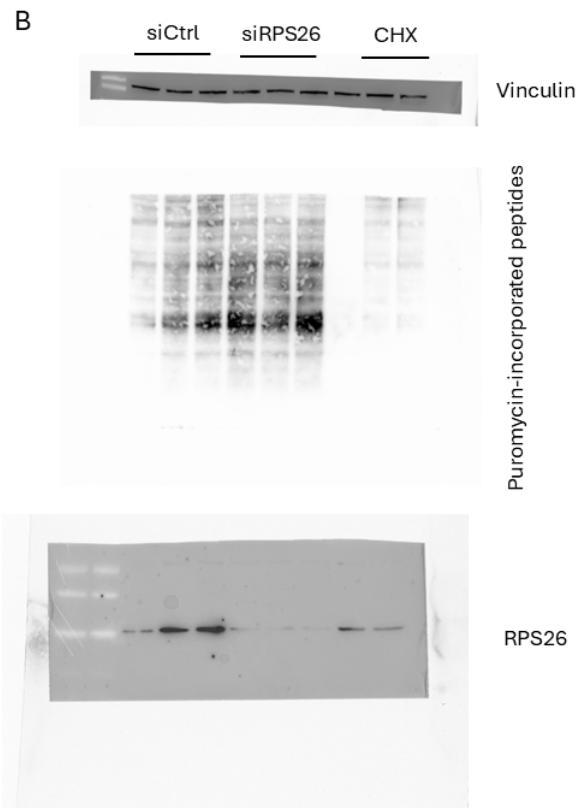

Supplement: fig2-data1 [file elife-98631-fig2-data1-v1.zip]

Images corresponding to **Figure 3**:

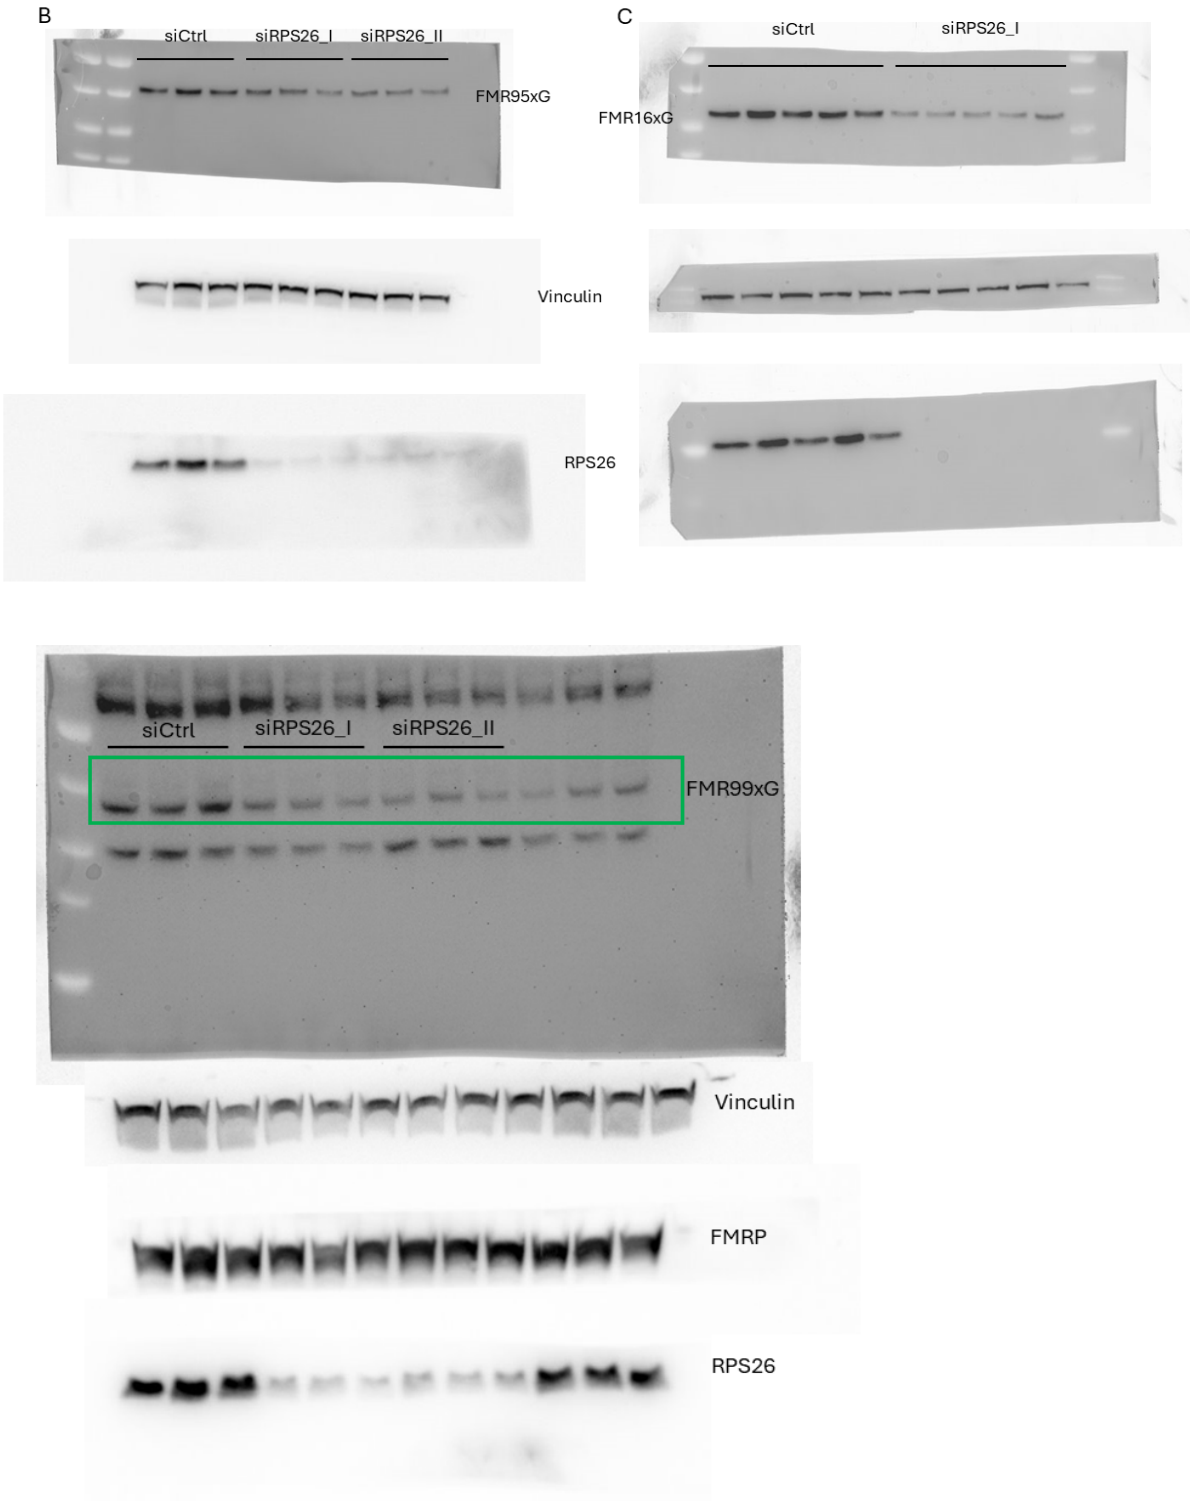

F

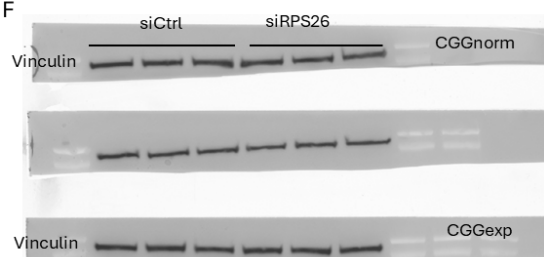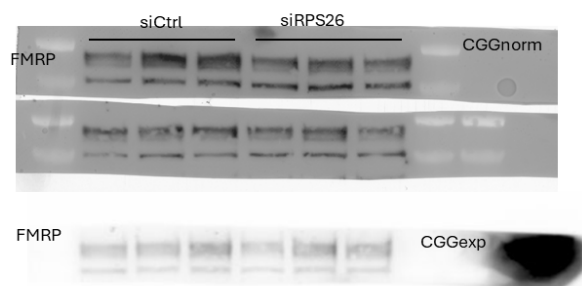

Supplement: fig3-data1 [file elife-98631-fig3-data1-v1.zip]

Images corresponding to **Figure 3 – figure supplement 1**:

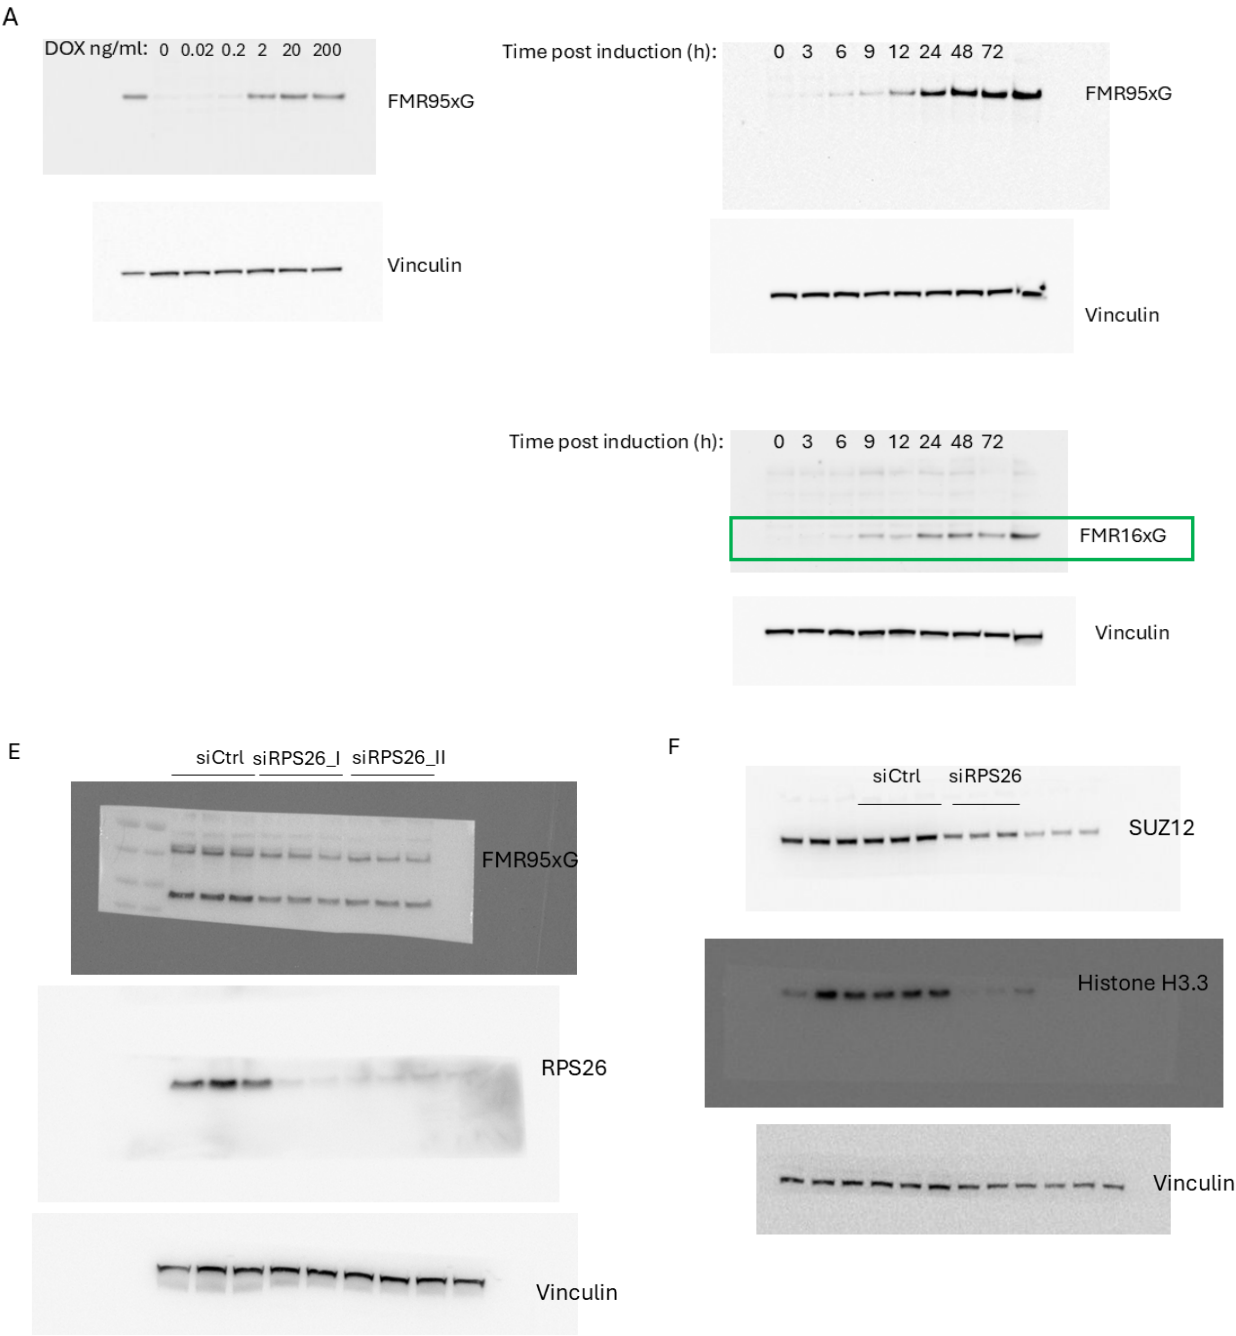

Supplement: fig3-figsupp1-data1 [file Figure 3 - figure supplement 1 - source data 1.pdf › Figure 3 - figure supplement 1 - source data 1.pdf]

Images corresponding to **Figure 4**:

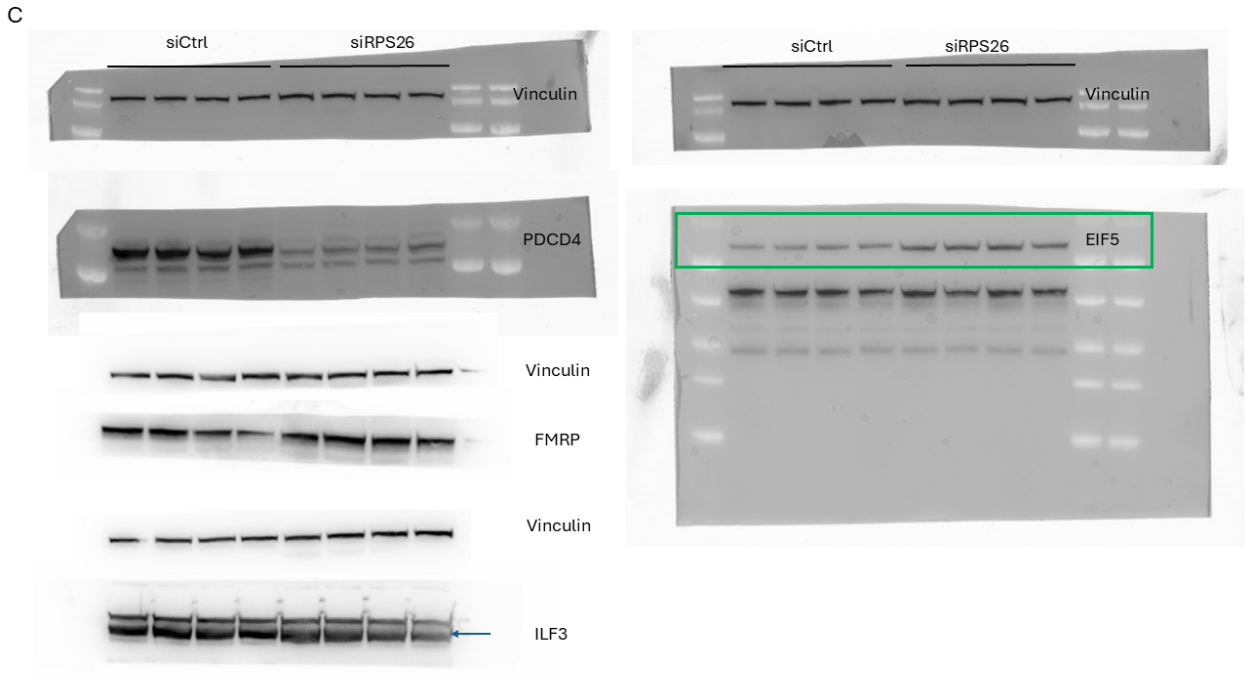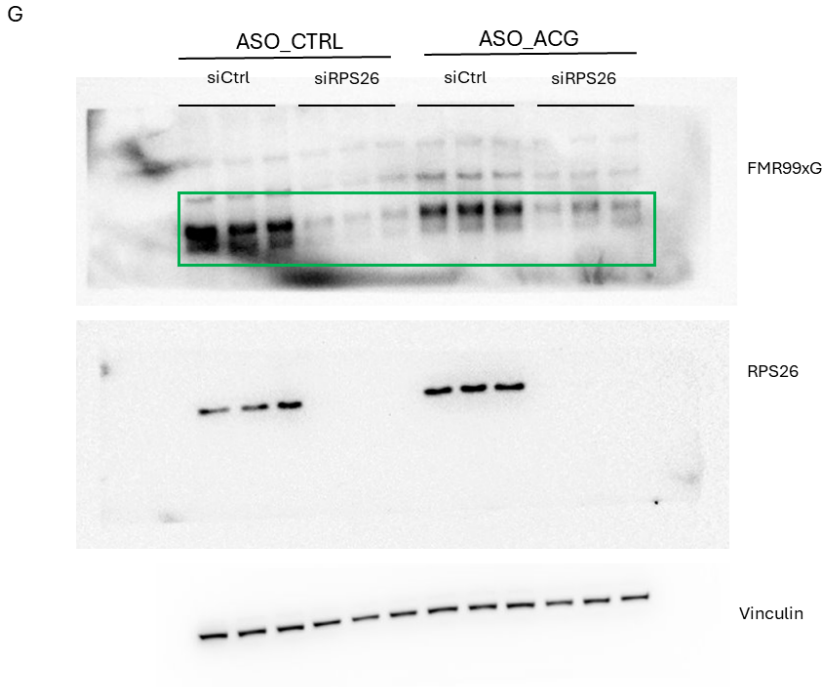

Supplement: fig4-data1 [file elife-98631-fig4-data1-v1.zip]

Images corresponding to **Figure 4 – figure supplement 1**:

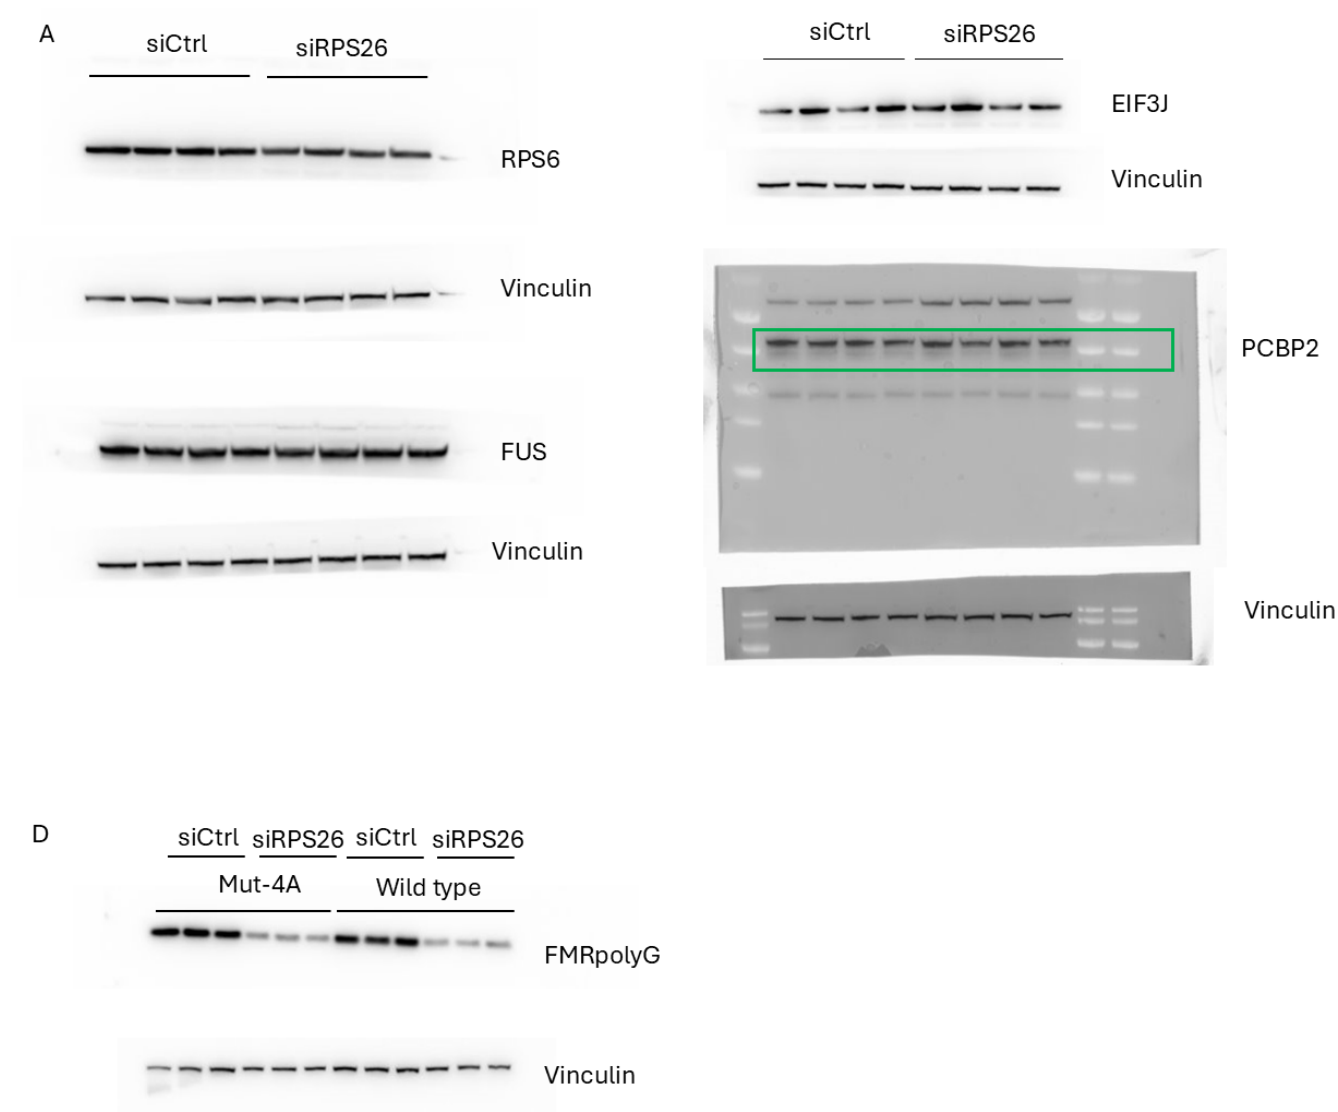

Supplement: fig4-figsupp1-data1 [file elife-98631-fig4-figsupp1-data1-v1.zip]

Images corresponding to **Figure 5**:

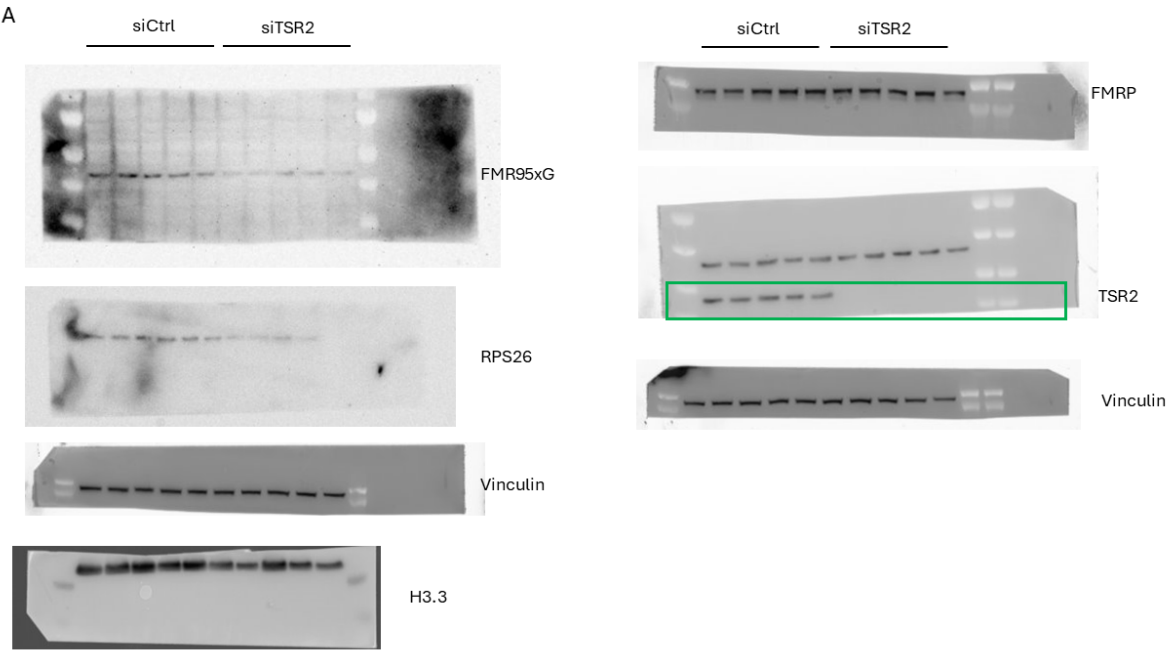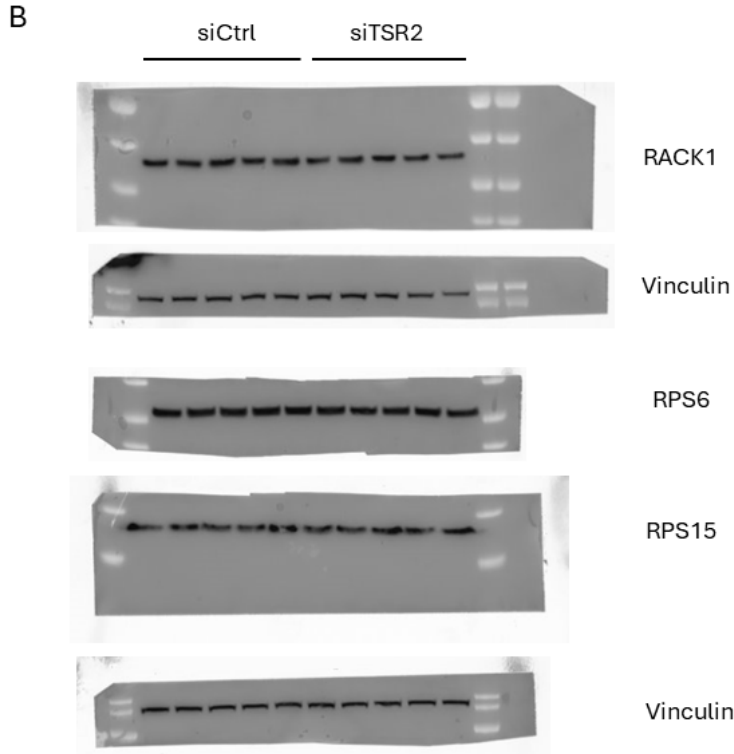

C

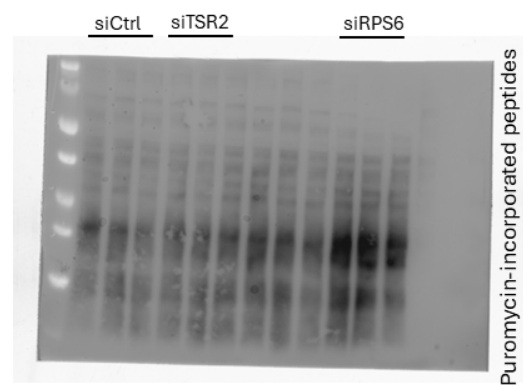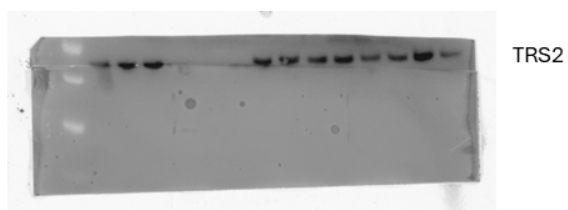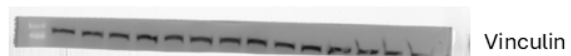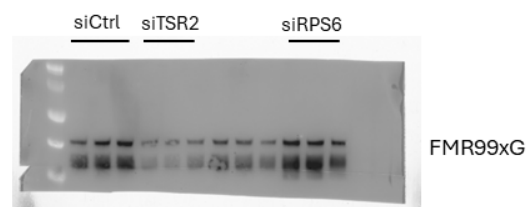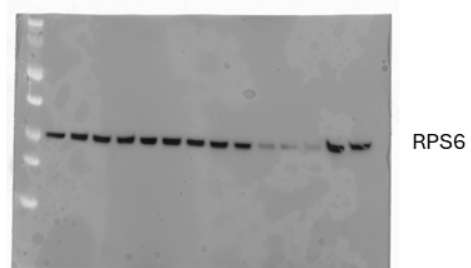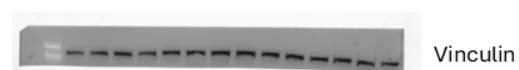

Supplement: fig5-data1 [file elife-98631-fig5-data1-v1.zip]

Images corresponding to **Figure 5 – figure supplement 1:**

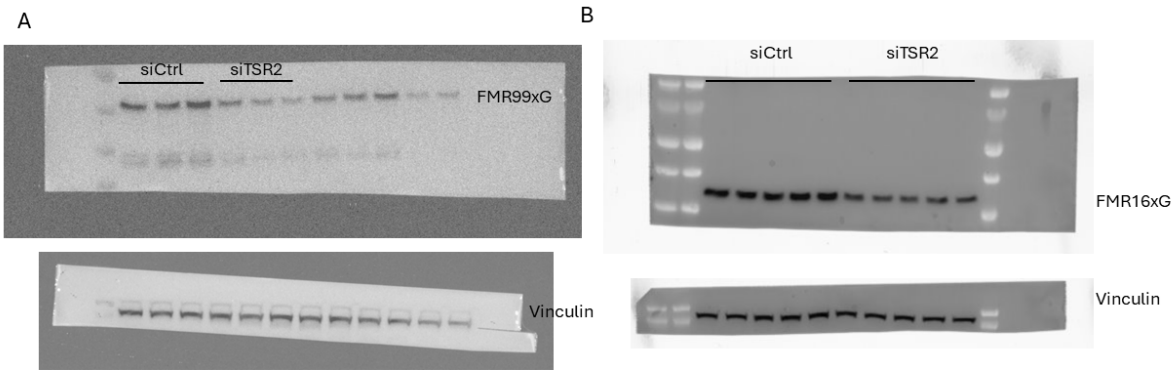

Supplement: fig5-figsupp1-data1 [file elife-98631-fig5-figsupp1-data1-v1.zip]

Images corresponding to **Figure 6**:

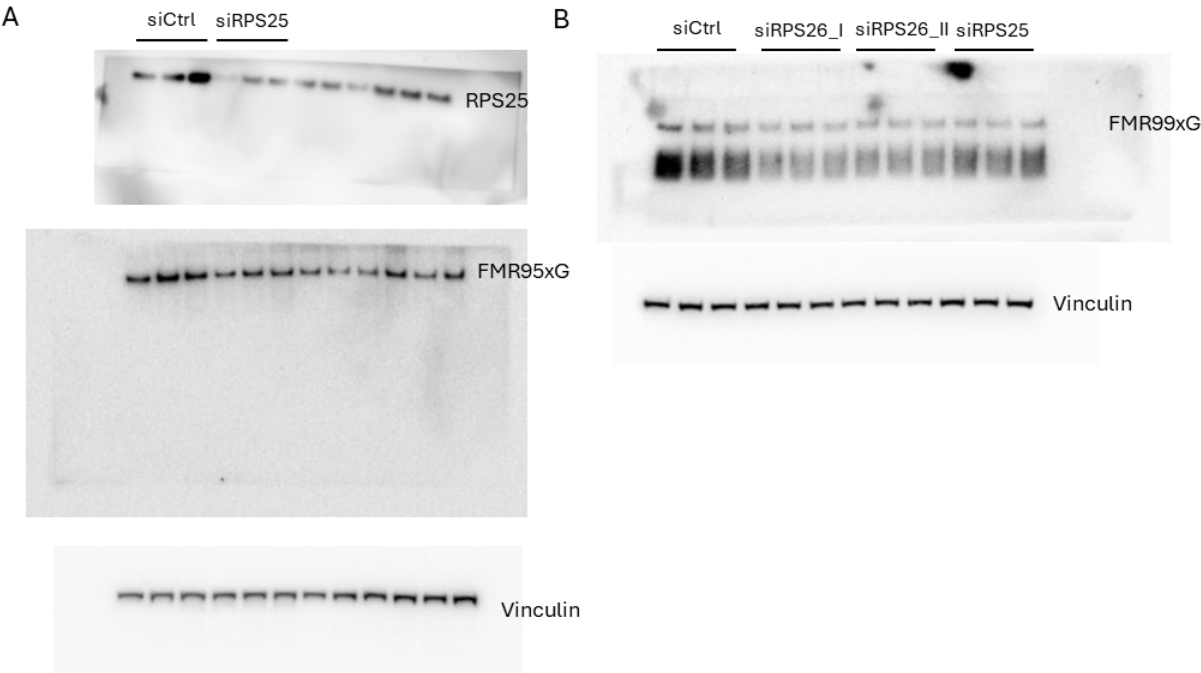

Supplement: fig6-data1 [file elife-98631-fig6-data1-v1.zip]

Images corresponding to **Figure 6 – figure supplement 1**:

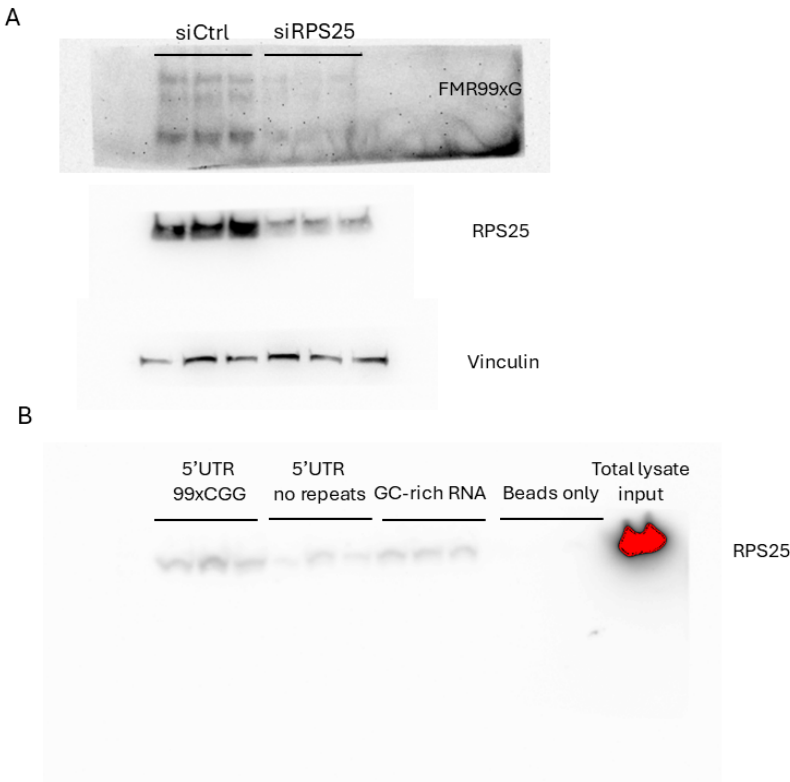

Supplement: fig6-figsupp1-data1 [file elife-98631-fig6-figsupp1-data1-v1.zip]
